# Supplementary material for: Plasma and Urine Metabolite Profiles Impacted by Increased Dietary Navy Bean Intake in Colorectal Cancer Survivors: A Randomized-Controlled Trial
Source: Oxford University Press journal article supplement (doi:10.1158/1940-6207.capr-20-0270), 2020-12-24
Supplement: 19406207capr200270-sup-244212_4_supp_6781601_ql74yj.xlsx [file 19406207capr200270-sup-244212_4_supp_6781601_ql74yj.xlsx]

## Sheet: Supplementary Table 2
Supplementary Table 2. Identified metabolites for the four study foods organized into the chemical classes for control (no navy bean powder) and navy bean (17.5g/serving navy bean powder).
CHEMICAL CLASS	METABOLIC PATHWAY	BIOCHEMICAL	COMP_ID	PLATFORM	CHEMICAL_ID	RI	MASS	CAS	PUBCHEM	KEGG	Group HMDB	Control Baked Pasta Marinara	Navy Bean Baked Pasta Marinara	Control Blackberry Cobbler	Navy Bean Blackberry Cobbler	Control Caraway Crackers	Navy Bean Caraway Crackers	Control Strawberry Pineapple Smoothie	Navy Bean Strawberry Pineapple Smoothie
Amino Acid	Alanine and Aspartate Metabolism	alanine	1126	LC/MS Pos Early	811	1700	90.055	56-41-7	5950	C00041	HMDB00161	470812480	490531936	817338688	566008256	135668560	99929968	214453344	197922896
		asparagine	512	LC/MS Pos Early	917	1225	133.061	70-47-3	6267	C00152	HMDB00168	1220182528	1386687104	1301353984	716322560	347986272	311911840	1246343040	1413470720
		aspartate	443	LC/MS Pos Early	234	1165	134.045	56-84-8	5960	C00049	HMDB00191	928686720	1023324928	197518784	306447552	139408304	138999824	147129280	168300608
		N-acetylalanine	1585	LC/MS Polar	1110	1564.8	130.051	97-69-8	88064	C02847	HMDB00766	1397699	1590589	1152177	818144	697477	596989	3378261	1979409
		N-acetylasparagine	33942	LC/MS Pos Early	100001257	785	175.071	4033-40-3	99715		HMDB06028	1130074	999826			466146	438279	509066	444224
		N-acetylaspartate (NAA)	22185	LC/MS Polar	100000787	3143	174.041	997-55-7;997-55-7	65065	C01042	HMDB00812	409671	536724	284877	276310	122435	536042	128879	207475
		N-methylaspartate	42996	LC/MS Pos Early	100004044	1039	148.06	6384-12-05	4376			99380	1881516	901842	1252472	174265	2.08807e+06		1253757
	Creatine Metabolism	creatine	27718	LC/MS Pos Early	1221	1947	132.077	57-00-1	586	C00300	HMDB00064	291377920	361717440	5254261	5290123	50110736	68581424	825001856	564001344
		creatinine	513	LC/MS Pos Early	275	2055	114.066	60-27-5	588	C00791	HMDB00562	132362520	180353152	4052215	7778988	54369496	84961720	447768480	246178944
		guanidinoacetate	43802	LC/MS Pos Early	344	1937	118.061	352-97-6	763	C00581	HMDB00128	360301	352342	971730	1156540	680620	486557	1.02442e+06	852280
	Glutamate Metabolism	4-hydroxyglutamate	40499	LC/MS Pos Early	100002544	1141	164.055	2485-33-8	439902	C03079	HMDB01344	649450	370335	226516	518138	302056	178935	508748	595500
		beta-citrylglutamate	54923	LC/MS Neg	100003271	530	320.062	73590-26-8				823159	1126800	61593	150397	66378	120243	1574000	1023930
		carboxyethyl-GABA	40007	LC/MS Pos Early	100003260	2085	176.092	4386-03-02	2572		HMDB02201	9707363	6457976	4521819	5179763	2039347	2214261	4.18266e+06	6881341
		gamma-aminobutyrate (GABA)	1416	LC/MS Pos Early	141	2048	104.071	56-12-2	119	C00334	HMDB00112	800507456	943037760	453149504	406488064	261478448	86487152	433432224	473315808
		glutamate	57	LC/MS Pos Early	561	1500	148.06	56-86-0	611	C00025	HMDB00148	3466317312	3644948224	624255296	633697152	859974144	514104160	312122080	300777792
		glutamate, gamma-methyl ester	33487	LC/MS Pos Early	100001103	2170	162.076	1499-55-4	68662			2339784	2.63601e+06		1293629	1463683	641988
		glutamine	53	LC/MS Pos Early	563	1291	147.076	56-85-9	5961	C00064	HMDB00641	1225647488	630512256	459318592	147459408	76781960	48254396	463739904	611881600
		N-acetylglutamate	15720	LC/MS Pos Early	100000282	1050	190.071	5817-08-03	70914	C00624	HMDB01138	752348	1150688	3.34838e+06	1178453	3980717	2853028	2503597	2961181
		N-acetylglutamine	33943	LC/MS Pos Early	100001253	845	189.087	2490-97-3	182230	C02716	HMDB06029	1551491	2.01784e+06	3322121	533123	1712894	674708	1844342	5033817
		pyroglutamine*	46225	LC/MS Pos Early	100001540	1900	129.066	2353-44-8	134508			22281104	42008704	17308294	16746114	10030384	8978815	3165704	6862483
	Glutathione Metabolism	5-oxoproline	1494	LC/MS Neg	1021	738.5	128.035	98-79-3	7405	C01879	HMDB00267	994760000	1370758912	95456120	144627248	66635868	121918480	40017960	101763624
		cysteinylglycine	35637	LC/MS Pos Early	278	2132	179.048	19246-18-5	439498	C01419	HMDB00078	993768	114862		238546	757129
		glutathione, oxidized (GSSG)	27727	LC/MS Pos Early	448	2667	613.159	103239-24-3	65359	C00127	HMDB03337	284396		401668	362186	368360		144179	166047
		glutathione, reduced (GSH)	2127	LC/MS Pos Early	496	2000	308.091	70-18-8	124886	C00051	HMDB00125	225589	177343	375309	1503542	112750		1601347	448084
		ophthalmate	34592	LC/MS Pos Early	100001311	2085	290.135	495-27-2	7018721		HMDB05765	112728						561880
		S-methylglutathione	33944	LC/MS Pos Early	100001259	2200	322.107	2922-56-7	3605667	C11347		79170		91625	110948
	Glycine, Serine and Threonine Metabolism	2-methylserine	53229	LC/MS Pos Early	100009246	1652	120.066		94309			3881456	4.01283e+06	554619	1559519	1636737	1384802	1776213	5789154
		betaine	3141	LC/MS Pos Early	799	1064	118.086	107-43-7	247	C00719	HMDB00043	1500770944	941418048	326410560	219998000	222209952	116166584	446710304	337077408
		dimethylglycine	5086	LC/MS Pos Early	806	1104	104.071	1118-68-9	673	C01026	HMDB00092	1229864				812242
		glycine	58	LC/MS Pos Early	340	1375	76.0393	56-40-6	750	C00037	HMDB00123	58733428	47847240	12705292	11143118	25711876	17878928	14858156	17076316
		N-acetylglycine	27710	LC/MS Pos Early	100001006	826	118.05	543-24-8	10972		HMDB00532	1492064	2.6519e+06	477172	459638	1148511	1112276	1090746	796193
		N-acetylserine	37076	LC/MS Pos Early	100001851	811	148.06	97-14-3	65249		HMDB02931	3454353	3983767	1849167	1758665	1.03565e+06	725796	1930616	1927923
		O-acetylhomoserine	31539	LC/MS Polar	100001129	1850	160.062	7540-67-2	439389	C01077		1232146	2419106	385234	364970	484454	129729	3.95333e+06	2086189
		serine	1648	LC/MS Pos Early	503	1239	106.05	56-45-1	5951	C00065	HMDB00187	364233856	293854656	288087488	205866112	116268984	58022872	138799872	130721768
		threonine	1284	LC/MS Pos Early	564	1514	120.066	72-19-5	6288	C00188	HMDB00167	470103200	455844288	169489824	115013568	106534592	56263488	130614152	141204192
	Guanidino and Acetamido Metabolism	1-methylguanidine	48114	LC/MS Pos Early	100000715	2149	74.0713	22661-87-6	10111	C02294	HMDB01522	512552	478230		184978		173314	215557	257944
		4-guanidinobutanoate	15681	LC/MS Pos Early	100000096	2320	146.092	463-003;463-00-3	500	C01035	HMDB03464	78433168	63243444	21236932	22072334	60927284	35835656	11871458	15085469
	Histidine Metabolism	1-methylimidazoleacetate	32350	LC/MS Pos Early	100001208	2064	141.066	2625-49-2	75810	C05828	HMDB02820	330738	231834	118918	248294	184397	147915	539578	372642
		4-imidazoleacetate	32349	LC/MS Pos Early	100001207	2055	127.05	645-65-8	96215	C02835	HMDB02024	5440971	4733406	3549020	2998836	3537894	3037219	956751	1662579
		histamine	1574	LC/MS Pos Early	354	3035	112.087	51-45-6	774	C00388	HMDB00870	3392837	4.04533e+06	281561
		histidine	59	LC/MS Neg	355	755.9	154.062	5934-29-2	6274	C00135	HMDB00177	42217292	35076696	7720735	9136098	13680236	8969840	3803398	21945440
		imidazole lactate	15716	LC/MS Pos Early	100000263	2040	157.061	14403-45-3	440129	C05568	HMDB02320	1384396	2157114	80762	289658	1140299	1581207	966838	625459
		imidazole propionate	40730	LC/MS Pos Early	100003434	2263	141.066	1074-59-5	70630		HMDB02271	341283	152591				210625	420198	174329
		N-acetylhistidine	33946	LC/MS Pos Early	100001293	2065	198.087	39145-52-3	75619	C02997	HMDB32055	8937670	5839844			6022635	3509023	5259453	4763626
		trans-urocanate	607	LC/MS Pos Early	537	2285	139.05	104-98-3	736715	C00785	HMDB00301	1119160	770084	333212	784354	723861	1747132	497632	699454
	Leucine, Isoleucine and Valine Metabolism	2-hydroxy-3-methylvalerate	36746	LC/MS Neg	100001541	1800	131.071	488-15-3	164623		HMDB00317	7740347	8463760	239290	276933	10039483	5390057	10291589	4126780
		2-methylbutyrylcarnitine (C5)	45095	LC/MS Pos Early	100001509	3035	246.17	31023-25-3	6426901		HMDB00378	7712959	6660862			1108406	1223172	17605532	8389837
		3-hydroxy-2-ethylpropionate	32397	LC/MS Neg	100001170	975	117.056	4374-62-3	188979		HMDB00396	235903	329642			128238	151452	73277	278732
		3-hydroxyisobutyrate	1549	LC/MS Polar	111	1619	103.04	2068-83-9	87	C06001	HMDB00336	264233	324044					953977	196734
		3-methyl-2-oxobutyrate	44526	LC/MS Polar	100000936	911	115.04	3715-29-5	49	C00141	HMDB00019	1025996	878202	365504	520830		300207	530239	3482229
		3-methyl-2-oxovalerate	15676	LC/MS Neg	100000036	2064.2	129.056	1460-34-0;51829-07-3	47	C00671	HMDB03736	679815	255229	695737	465646	522088		2947345	584083
		4-methyl-2-oxopentanoate	22116	LC/MS Neg	100000551	2170	129.056	816-66-0	70	C00233	HMDB00695	2624047	1209121	652945	792765	493074	616563	5874148	2896031
		alpha-hydroxyisocaproate	22132	LC/MS Neg	100000706	1840	131.071	10303-64-7	83697	C03264	HMDB00746	11734856	20211010	329341	249639	15963153	9963095	12633417	5264501
		alpha-hydroxyisovalerate	46537	LC/MS Polar	100001300	1052	117.056	600-37-3	99823		HMDB00407	15418857	14032385	592487	818543	11696548	6138494	8742806	20450754
		beta-hydroxyisovalerate	12129	LC/MS Polar	1442	1149.8	117.056	625-08-1	69362		HMDB00754	549607	1563872	207510	462648	629149	525234	702563	494312
		isobutyrylcarnitine (C4)	33441	LC/MS Pos Early	100001055	2810	232.154	25518-49-4	168379		HMDB00736	24969968	32698058	321115	772233	4267904	5520230	63108264	34847920
		isoleucine	1125	LC/MS Pos Early	376	2800	132.102	73-32-5	6306	C00407	HMDB00172	1383030016	1140244608	143944720	215295168	557882688	343558816	191102992	226528144
		isovalerylcarnitine (C5)	34407	LC/MS Pos Early	100001393	3085	246.17	31023-24-2	6426851		HMDB00688	1847634	1171690				227526	1.92305e+06	1306885
		isovalerylglycine	35107	LC/MS Neg	100001452	1950	158.082	16284-60-9	546304		HMDB00678	454419	474655			276773	357338	461111	304032
		leucine	60	LC/MS Pos Early	397	2864	132.102	61-90-5	6106	C00123	HMDB00687	1414502272	1087079936	140692480	194211776	494135968	293222112	170691504	282689472
		methylsuccinate	15745	LC/MS Polar	2051	2800	131.035	498-21-5	10349		HMDB01844	11089881	7.87259e+06	6696372	12880561	6.78718e+06	1569405	5914861	3117829
		N-acetylisoleucine	33967	LC/MS Neg	100001276	2325	172.098	3077-46-1	2802421			153962	410567	128694	112596	248038	156144	81906	79095
		N-acetylleucine	1587	LC/MS Neg	1082	2400	172.098	1188-21-2	70912	C02710	HMDB11756	471665	401455	196251	150056	319476	184262	93338	126827
		N-acetylvaline	1591	LC/MS Neg	1084	1704	158.082	96-81-1	66789		HMDB11757	93619	231325	214772	103376	250204	181676		106915
		N-methylleucine	35666	LC/MS Pos Early	100001581	2787	146.118	66866-69-1	2777993				62035680		57296444		72696368		71719568
		tiglylcarnitine (C5:1-DC)	35428	LC/MS Pos Early	100001597	2962	244.154	64191-86-2	22833596		HMDB02366	711990	619057					890359	486689
		valine	1649	LC/MS Pos Early	566	2479	118.086	72-18-4	6287	C00183	HMDB00883	796663488	563063296	206188416	135557744	228770784	126424728	74929960	112944872
	Lysine Metabolism	6-oxopiperidine-2-carboxylate	43231	LC/MS Neg	100004499	964.5	142.051	34622-39-4	3014237			2186954	1883111	370701	868681	2558467	487136	661949	842920
		glutarate (pentanedioate)	396	LC/MS Polar	339	2900	131.035	110-94-1	743	C00489	HMDB00661	721534			1749041	1415290
		lysine	1301	LC/MS Pos Early	407	2850	147.113	56-87-1	5962	C00047	HMDB00182	549738048	443113696	18952144	18231412	160574400	90287176	55931228	68435432
		N6,N6,N6-trimethyllysine	1498	LC/MS Pos Early	189	2825	189.16	23284-33-5	440120	C03793	HMDB01325	112834256	108556760	4181984	10227695	10715191	7640308	10172528	14937816
		N6-acetyllysine	36752	LC/MS Pos Early	100001734	2131	189.123	692-04-6	92832	C02727	HMDB00206	60052168	45958908	15566227	29819480	5798646	2985724	3004340	5484478
		pipecolate	1444	LC/MS Pos Early	1025	2200	130.086	4043-87-2	849	C00408	HMDB00070	130784616	3176435456	274760736	3019021056	118069432	3453012224	135901168	3473510656
		saccharopine	1495	LC/MS Pos Early	392	2530	277.139	997-68-2	160556	C00449	HMDB00279	7.11548e+06	4968084	381165	308374	712702	109018		208753
	Methionine, Cysteine, SAM and Taurine Metabolism	2-hydroxybutyrate/2-hydroxyisobutyrate	52281	LC/MS Polar	100008928	1258	103.04					858821	595397	1012671	831883	749165	444590	4.13091e+06	2310685
		cystathionine	15705	LC/MS Pos Early	310	2270	223.075	535-34-2	439258	C02291	HMDB00099	16568163	4040166					160714
		cysteine	1868	LC/MS Pos Early	800	1488	122.027	52-90-4;56-89-3	5862	C00097	HMDB00574		117080	181207	240866	1221962	511983	467086	736783
		hypotaurine	590	LC/MS Pos Early	358	724	110.027	300-84-5	107812	C00519	HMDB00965	1090864	1117825					492699	117000
		methionine	1302	LC/MS Pos Early	415	2526	150.058	63-68-3	6137	C00073	HMDB00696	336298752	286462944	72779600	48523008	119561504	85280416	97017976	138392064
		methionine sulfone	44878	LC/MS Pos Early	100004635	1250	182.048	820-10-0	69961			1350294	1252455	706762	774734	835864	393349	228397	488969
		methionine sulfoxide	18374	LC/MS Pos Early	100000039	1272	166.053	3226-65-1	158980	C02989	HMDB02005	75064016	41143688	66139204	18247748	34751600	14271460	30206984	14847176
		N-acetylmethionine	1589	LC/MS Neg	1083	1787	190.054	65-82-7	448580	C02712	HMDB11745	1259691	1731520	279650	833042	361597	834032	683263	1482741
		N-acetyltaurine	48187	LC/MS Neg	100005466	800	166.018		159864			171870	133239	67026	59254	100442	56374
		N-formylmethionine	2829	LC/MS Neg	194	1543.8	176.039	4289-98-9	439750	C03145	HMDB01015	306972	256642				123454	286351	281853
		S-adenosylhomocysteine (SAH)	42382	LC/MS Neg	197	1832.4	383.114	979-92-0	439155	C00021	HMDB00939	777217	349056	47556	112126	119279	83162		44866
		S-methylcysteine	39592	LC/MS Pos Early	100002749	1955	119.016	1187-84-4	24417		HMDB02108	10834626	74051176	215700	79921568	568949	63864336	2333979	71616624
		S-methylmethionine	38127	LC/MS Pos Early	100002183	2584	164.074	3493-12-07	458	C05319		211973584	87471760	14913020	998928	947095	93532	119349728	118523720
		taurine	2125	LC/MS Polar	512	2120	124.007	107-35-7	1123	C00245	HMDB00251	1048684	1353510			145758	142638	2241157	1527710
	Phenylalanine and Tyrosine Metabolism	3-(4-hydroxyphenyl)lactate	32197	LC/MS Neg	240	1379	181.051	6482-98-0	9378	C03672	HMDB00755	16450735	18064554	485202	470035	16035523	13209268	42263800	13512154
		3-(4-hydroxyphenyl)propionate	39587	LC/MS Neg	100002914	1670	165.056	501-97-3	10394	C01744	HMDB02199	98232	203522	254213	200551	120986		220273	84571
		3-methoxytyramine	38630	LC/MS Pos Early	118	2635	168.102	1477-68-5	1669	C05587	HMDB00022	813666	1009984	1313000	1038272	202122	129181
		3-methoxytyrosine	12017	LC/MS Pos Early	1342	2555	212.092	300-48-1	1670		HMDB01434	338049	536234	401724	406258		281125		241555
		4-hydroxycinnamate	36770	LC/MS Neg	100001675	1457	163.04	501-98-4	637542	C00811	HMDB02035	865796	1720243	1816132	1.01933e+06	2530269	1.99406e+06	6734507	8581381
		4-hydroxyphenylacetate	541	LC/MS Neg	144	1361.1	151.04	156-38-7	127	C00642	HMDB00020					13551500	1651881
		4-hydroxyphenylpyruvate	1669	LC/MS Neg	1141	1690.1	179.035	156-39-8	979	C01179	HMDB00707	927180	511011	605517	251590	276157	198868	2114248	1532902
		gentisate	18280	LC/MS Polar	100000447	905	153.019	490-79-9	3469	C00628	HMDB00152	453488	1092333	32925392	36562616	2950606	525160	1548640	2270862
		N-acetylphenylalanine	33950	LC/MS Pos Early	100001256	2680	208.097	2018-61-3	74839	C03519	HMDB00512	1152885	2313645	209550	323026	840278	713979	181519	231618
		N-acetyltyrosine	32390	LC/MS Neg	100001104	1680	222.077	537-55-3	68310		HMDB00866	185963	396820			209743	74610
		N-formylphenylalanine	48433	LC/MS Neg	100006056	2360	192.067	13200-85-6	759256			594873	629455	57246	132614	351080	491764		100651
		p-cresol sulfate	36103	LC/MS Neg	100001315	2890	187.007	3233-57-7	4615423	C01468	HMDB11635	9709102	13697885	198864	193253	1388881	1823499	25171702	14675270
		phenethylamine	12142	LC/MS Pos Early	1207	3065	122.096	64-04-0	1001	C05332	HMDB02017	5743143	7679971	1653386	577904	961670	1214879	959198	2771227
		phenol sulfate	32553	LC/MS Neg	100001510	2156	172.991	937-34-8	74426	C02180	HMDB60015	1083585	1356453		26054	177418	221805	2934754	1.6485e+06
		phenylalanine	64	LC/MS Pos Early	460	2878	166.086	63-91-2	6140	C00079	HMDB00159	1407820032	1409532160	111216608	173416544	424298944	283910368	139369840	207784656
		phenyllactate (PLA)	22130	LC/MS Neg	100000774	2208	165.056	828-01-3	3848	C05607	HMDB00779	24660104	21520992	554346	545317	16910448	13056217	13653753	4473061
		phenylpyruvate	566	LC/MS Neg	241	2517.6	163.04	156-06-9	997	C00166	HMDB00205	630174	267384	239831	174381		150739	1041949	544275
		tyramine	1603	LC/MS Pos Early	1133	2540	138.091	60-19-5	5610	C00483	HMDB00306	7485195	11283282	5345882	832387	770098	1013379	1218466	5530126
		tyrosine	1299	LC/MS Pos Early	815	2430	182.081	60-18-4	6057	C00082	HMDB00158	343360864	296286976	63484056	89237200	92782824	83280560	40889316	68449512
	Polyamine Metabolism	4-acetamidobutanoate	1558	LC/MS Pos Early	1113	1350	146.081	3025-96-5	18189	C02946	HMDB03681	16412077	38696424	872785	1393576	3.26033e+06	2274337	1966053	1.88814e+06
		5-methylthioadenosine (MTA)	1419	LC/MS Pos Early	212	2752	298.097	2457-80-9	439176	C00170	HMDB01173	53912360	70041168	7395789	15429448	2608513	5095562	1160863	2407175
		agmatine	15496	LC/MS Pos Early	100000103	3057	131.129	2482-00-0	199	C00179	HMDB01432	3923143	2652575	54810	330254	252274	246644	384436	1045997
		N(4)-acetylspermidine	32356	LC/MS Pos Early	100001214	3095	188.176	66039-56-3	128317			1.84266e+06	1844436	447483	338320	63285	9683	855413	626039
		N-acetylputrescine	37496	LC/MS Pos Early	192	2230	131.118	18233-70-0	122356	C02714	HMDB02064	24811746	22862892	6876862	768333	833758		3582990	2317050
		putrescine	1408	LC/MS Pos Early	49	3027	89.1073	110-60-1	1045	C00134	HMDB01414	7291846	5878193	1298616	699405	284614		1209398	2107263
		spermidine	485	LC/MS Pos Early	50	3355	146.165	124-20-9	1102	C00315	HMDB01257	5264121	3107939	528352	1545285	198898	133476	4602133	3143043
	Tryptophan Metabolism	indole-3-carboxylic acid	38116	LC/MS Neg	100002185	1708.8	160.04	771-50-6	69867	C19837	HMDB03320	350235	273942		46533	102720	100065		35372
		indoleacetate	27513	LC/MS Pos Early	100001034	2850	176.071	6505-45-9	802	C00954	HMDB00197	1152204	1328910	720138	1448878	4185900	4133133	367858	182163
		indolelactate	18349	LC/MS Pos Early	100000463	2600	206.081	832-97-3	92904	C02043	HMDB00671	3547266	5638176			4248186	5250597	3503451	1076979
		kynurenate	1417	LC/MS Neg	98	2224	188.035	492-27-3	3845	C01717	HMDB00715	1.58655e+06	1711009	48062	55810	736106	332069	361516	334566
		kynurenine	15140	LC/MS Pos Early	100000265	2739	209.092	2922-83-0	161166	C00328	HMDB00684	1521040	1053130	466644	556288	792344		925898	375931
		N-acetyltryptophan	33959	LC/MS Neg	100001254	2630	245.093	1218-34-4	700653	C03137	HMDB13713	496108	917725		154471	103836	127622		131364
		N-methyltryptophan	37456	LC/MS Pos Early	100002083	2910	219.113	526-31-8	914	C02983			364417		273558	390180	459392		335452
		serotonin	2342	LC/MS Pos Early	504	2550	177.102	153-98-0	5202	C00780	HMDB00259	424819	162291	51640564	133582144	179235	324495		44353736
		thioproline	53231	LC/MS Pos Early	100009232	1250	134.027	34592-47-4	93176;6973609			2374501	810560	199085	762850	1310902	471208	619826	1444876
		tryptamine	6104	LC/MS Pos Early	1095	3062	161.107	61-54-1	1150	C00398	HMDB00303	5414223	4408139	3131790	4103956	194916	456653	78954	5349036
		tryptophan	54	LC/MS Pos Early	565	2986	205.097	73-22-3	6305	C00078	HMDB00929	234320160	186458416	48020644	101369960	121006352	64067048	62857568	103883936
		tryptophan betaine	37097	LC/MS Pos Early	100001743	2673	247.144	20671-76-5	442106	C09213	HMDB61115					129552792
	Urea cycle; Arginine and Proline Metabolism	2-oxoarginine*	55072	LC/MS Neg	100002784	963	172.073	3715-10-04	558	C03771	HMDB04225	1780173	1426304	50147	199676	294096	466025		1377508
		argininate*	57461	LC/MS Pos Early	100002769	2150	176.103	157-07-3	160437		HMDB03148	480819	554512	414822	402694	959472	370175	554846	398131
		arginine	1638	LC/MS Pos Early	231	2825	175.119	1119-34-2	232	C00062	HMDB00517	1325956992	1842044800	826036992	957946752	1190889984	609383936	140425840	737793728
		argininosuccinate	15497	LC/MS Pos Early	232	2745	291.13	156637-58-0	16950;828	C03406	HMDB00052	1176266	161222	115978		907803
		citrulline	2132	LC/MS Pos Early	391	1520	176.103	372-75-8	9750	C00327	HMDB00904	135501168	143171776	46925236	43988872	52355220	37062152	6556992	25761048
		dimethylarginine (SDMA + ADMA)	36808	LC/MS Pos Early	100001810	2850	203.15	102783-24-4	123831	C03626	HMDB01539	26749948	21872432	3479280	3993014	11444333	3198555	5941963	6603272
		homocitrulline	22138	LC/MS Pos Early	100000963	1908	190.119	1190-49-4	65072	C02427	HMDB00679	7498913	2181550	101492	1295141	1670240	1453040	860214	1687607
		trans-4-hydroxyproline	32306	LC/MS Pos Early	1001	1064	132.066	51-35-4	5810	C01157	HMDB00725	18726222	15420482	11241258	9757693	7248366	7847459	33334226	33169114
		N-acetylarginine	33953	LC/MS Pos Early	100001266	2245	217.13	155-84-0	67427	C02562	HMDB04620	3.22662e+06	1618700	1381040	135263	10873709	1255176	2291766	517398
		N-acetylproline	34387	LC/MS Pos Early	100001334	1695	158.081	1074-79-9	322640			23417880	11265744	15833801	8047547	5507620	864076	1219296	802726
		N-alpha-acetylornithine	32984	LC/MS Pos Early	100000285	2000	175.108	6205-08-09	439232	C00437	HMDB03357	340407	211218	570260	570245	2157524	426586	1701363	1.57174e+06
		N-delta-acetylornithine	43249	LC/MS Pos Early	100004523	1877	175.108		9920500			161848736	281854688	28326900	91438728	9060813	52151996	4139257	79178552
		N-methylproline	37431	LC/MS Pos Early	100001956	1335	130.086	475-11-6	557			10685334	7503359	268618656	140496432	5749358	3323894	39086936	9287437
		N-monomethylarginine	43586	LC/MS Pos Early	100004488	2845	189.135	53308-83-1	132862	C03884	HMDB29416	22000118	34712308	6.28128e+06	17884944	19593544	8986717	1705180	16824248
		ornithine	1493	LC/MS Pos Early	444	2800	133.097	3184-13-2	6262	C00077	HMDB03374	142993136	57406608	3545034	4765419	4476440	4032122	4056954	6292567
		proline	1898	LC/MS Pos Early	480	1603	116.071	147-85-3	145742	C00148	HMDB00162	2039321344	1401923200	1363499392	977265920	1365328640	815099456	634559424	617765568
Carbohydrate	Advanced Glycation End-product	N6-carboxymethyllysine	36713	LC/MS Pos Early	100001768	2500	205.118	5746-04-03				146413			77683	202206			152113
	Aminosugar Metabolism	erythronate*	42420	LC/MS Polar	100001320	2186	135.03	88759-55-1	2781043		HMDB00613	100740456	117766280	277974784	374845024	141713168	56553732	68825120	65683712
		glucuronate	15443	LC/MS Polar	100000257	3233.3	193.035	207300-70-7	444791	C00191	HMDB00127	11434136	12407527	14675958	4230488	4921704	4.10546e+06	39877824	27563252
		N-acetyl-glucosamine 1-phosphate	15741	LC/MS Polar	1212	4052	300.049	31281-59-1	440364	C04256	HMDB01367	31788250	41213144	213861	370686	3716813	5482108	59649752	54666800
		N-acetylglucosamine/N-acetylgalactosamine	46539	LC/MS Polar	100006435	1897	220.083					17259156	21833358	1314055	1068736	2779773	3374154	45232120	26455344
		N-acetylglucosaminylasparagine	48149	LC/MS Pos Early	1215	1212	336.14	2776-93-4	123826	C04540	HMDB00489	146269	288454		90637				138871
		N-acetylneuraminate	32377	LC/MS Polar	1162	3072.6	308.099	131-48-6	439197	C00270	HMDB00230	2328703	2889678			138684	238565	7.41914e+06	2332530
	Disaccharides and Oligosaccharides	galactinol	34706	LC/MS Polar	100000908	4656	341.109	16908-86-4	439451	C01235	HMDB05826	1735974	4050775	306470	2174292	3063505	2216470		1573183
		lactose	567	LC/MS Polar	393	3500	387.114	5965-66-2	84571	C00243	HMDB00186	1305806336	1515645824	14700083	22837692	267935856	289067520	2410974720	1556433792
		raffinose	586	LC/MS Neg	879	978	503.162	17629-30-0	10542	C00492	HMDB03213	17235510	28949984	6.46267e+06	47407112	95476712	30700554	5732741	46476208
		stachyose	15960	LC/MS Neg	934	920	665.215	10094-58-3	439531	C01613	HMDB03553	6967367	112064488	3106074	64795708	70316464	126001176	782566	84594280
		sucrose	1519	LC/MS Polar	935	3092	387.114	57-50-1	5988	C00089	HMDB00258	485209376	566768320	1150309376	2950407424	567033472	475579904	920003392	3977410560
		trehalose 6-phosphate	36828	LC/MS Neg	100000296	608	421.075	136632-28-5	122336	C00689	HMDB01124	2070813	2459824		347550	1519187	1156435	5152673	3987975
		verbascose	37132	LC/MS Neg	100001864	935	827.267	546-62-3	441434	C08252		353324	1207729		838617	1700296	1582056		991482
	Fructose, Mannose and Galactose Metabolism	fructose	48195	LC/MS Polar	878	2022.2	225.062	57-48-7	5984	C00095	HMDB00660	772641728	837750912	2151569920	1673019904	787494272	853711424	3563806208	1582738304
		galactonate	27719	LC/MS Polar	100001026	3085	195.051	299-28-5	128869	C00880	HMDB00565	120604000	132448504	148809584		104076488	112666648	56837344	108473224
		galactose 1-phosphate	15706	LC/MS Polar	100000300	4552	259.022	19046-60-7	123912	C00446	HMDB00645	4879332	5980158	170822	210619	212041	558853	20141324	12706188
		mannitol/sorbitol	46142	LC/MS Polar	100001740	2260	181.072		5780	C01507	HMDB00247	914409280	390889152	45588524	31005528	49599544	26497900	64233768	13629265
		mannose-6-phosphate	1469	LC/MS Polar	294	4510	259.022	70442-25-0;104872-94-8	439198	C00275	HMDB01078	2126090	2486587				132221	3486656	2008344
	Glycogen Metabolism	isomaltose	39777	LC/MS Polar	100002764	3950	387.114	499-40-1	439193	C00252	HMDB02923	6.39558e+06	4560841	3972169	4637400	1979097
		maltose	15586	LC/MS Polar	913	3329.4	387.114	6363-53-7	10991489	C00208	HMDB00163	180291392	83419600	11712222	6680900	70959800	51531548	25023536
		maltotriose	44688	LC/MS Neg	100000276	812	503.162	1109-28-0	439586	C01835	HMDB01262	14626046	16522772	13985142	27708612	69955896	24474266	25930090	15844419
	Glycolysis, Gluconeogenesis, and Pyruvate Metabolism	glucose	48152	LC/MS Polar	572	2342	225.062	50-99-7	79025	C00031	HMDB00122	1422134784	1644436736	3100098560	2444772864	938220544	1056504768	4837169664	2802442240
		glucose 1-phosphate	15561	LC/MS Polar	1233	4277	259.022	56401-20-8	65533	C00103	HMDB01586	3746814	3.81547e+06	1427890	1151079	723658		9667874	3.90444e+06
		glucose 6-phosphate	31260	LC/MS Polar	291	4537	259.022	103192-55-8	5958	C00668	HMDB01401	2607159	2215585					4016074	4306827
		glycerate	1572	LC/MS Polar	1052	2070.4	105.019	600-19-1	752	C00258	HMDB00139	56266840	54562800	117599856	105789448	31924954	21690228	191633024	126958560
		Isobar: fructose 1,6-diphosphate, glucose 1,6-diphosphate, myo-inositol 1,4 or 1,3-diphosphate	46896	LC/MS Neg	100002180	551	338.989					36764	73305	193289	237372		70160	955314	1560161
		lactate	527	LC/MS Polar	482	1468.8	89.0244	79-33-4	612	C00186	HMDB00190	264383712	376396896	71885360	70613112	173363072	110070272	3452883200	2184592896
		pyruvate	48990	LC/MS Polar	823	1083	87.0088	127-17-3	1060	C00022	HMDB00243	3106804	18714124	1972615	1496132	430008	1872607	7558278	3472239
	Nucleotide Sugar	UDP-galactose	15860	LC/MS Polar	100000298	4000	565.048	2956-16-3;91183-98-1;137868-52-1	18068	C00052	HMDB00302		51160
		UDP-glucose	32344	LC/MS Polar	1096	3950	565.048	117756-22-6	8629	C00029	HMDB00286	303926	538972	410253	207062			93447	179505
	Pentose Metabolism	arabinose	575	LC/MS Polar	828	1804.5	195.051	28697-53-2	66308	C00216	HMDB00646	3.28025e+06	3.73007e+06		3249246	889822	427935
		arabitol/xylitol	48885	LC/MS Polar	100006430	1932.4	151.061					2835806	4244444	10857551	5765538	11164096	5755037	1466766	1510444
		arabonate/xylonate	48255	LC/MS Polar	100006115	2664.6	165.04					204462368	301373152	184738048	307249088	63161468	54662512	205380896	104441048
		ribitol	15772	LC/MS Polar	100000406	1789.6	151.061	488-81-3	6912	C00474	HMDB00508	369527	523341	349372	290468	899961	207720	245286	260461
		ribonate	27731	LC/MS Polar	100001007	2425	165.04	5336-08-03	5460677	C01685	HMDB00867	78695056	75773544	54548344	103565824	70100336	20679876	30743398	17675052
		ribose	1471	LC/MS Polar	914	1508.2	195.051	50-69-1	5779	C00121	HMDB00283	7072939	4700360	2970666	1.72331e+06	311189	302146	6482876	6991370
		ribulose/xylulose	54671	LC/MS Polar	100006122	1400	195.051					1861485	1731559	1184792	1012722	629795	859265	1447913	1039500
		sedoheptulose	53237	LC/MS Polar	100002619	2255	209.067	3019-74-7	5459879		HMDB03219	60876928	80390776	4687934	5037817	730184		5997450	5250800
		xylose	15581	LC/MS Polar	826	1727	195.051	609-06-3	135191	C00181	HMDB00098	4771179	4681361	48016624	16456955	281142	393153	65589856	61374376
	Pentose Phosphate Pathway	sedoheptulose-7-phosphate	35649	LC/MS Pos Early	100001628	540	273.037	2646-35-7	616	C05382	HMDB01068	754079	437289					292531	338193
Cofactors and Vitamins	Ascorbate and Aldarate Metabolism	ascorbate (Vitamin C)	32354	LC/MS Pos Early	233	770	177.039	134-03-2		C00072	HMDB00044	9227933	3010047	1882658	2702695	336341		1354280	496682
		dehydroascorbate	1659	LC/MS Polar	301	1130	173.009	490-83-5	835	C05422	HMDB01264	8.03676e+06	4085034	151864352	37528816			300266080	258536208
		glucarate (saccharate)	1476	LC/MS Polar	1020	3850	209.03	5793-88-4	33037	C00818	HMDB00663	216189	561719	2360695	9293195		955899	1365525	3129087
		gulonate*	46957	LC/MS Polar	100001586	2750	195.051	20246-53-1	9794176		HMDB03290	27038192	27616182		25514712	37593360	24573772	14642874	28270688
		oxalate (ethanedioate)	20694	LC/MS Neg	100000841	603	88.988	144-62-7	971	C00209	HMDB02329	1683362	931508	5388303	2266911	4963227	4186997	739438	1645020
		threonate	27738	LC/MS Polar	100001022	2384	135.03	70753-61-6	151152	C01620	HMDB00943	152315088	159393776	105588656	89835776	90529792	23898218	300447104	210928928
	Nicotinate and Nicotinamide Metabolism	nicotinamide	594	LC/MS Pos Early	432	1942	123.055	98-92-0	936	C00153	HMDB01406	60074320	21964302	7.84783e+06	27021006	20163324	21018592	15071110	23334152
		nicotinamide ribonucleotide (NMN)	22152	LC/MS Pos Early	1312	766	335.064	1094-61-7	14180	C00455	HMDB00229	916677	348030	1739393	948622	279649		197720	1408826
		nicotinamide riboside	33013	LC/MS Pos Early	100001310	2040	255.098	1341-23-7	439924	C03150	HMDB00855	32012182	2748595	7950728	3256302	416553		60656800	34857720
		nicotinate	1504	LC/MS Pos Early	567	1673	124.039	59-67-6	938	C00253	HMDB01488	60680576	88839952	4578445	9540949	34388592	31806668	10018326	10716115
		nicotinate ribonucleoside	33471	LC/MS Pos Early	100001316	1536	256.082	2625-49-2	161234	C05841	HMDB06809	144467264	36630100	26891788	32804972	15027364	6066490	49070324	20587330
		trigonelline (N'-methylnicotinate)	32401	LC/MS Pos Early	100001092	1388	138.055	535-83-1	5570	C01004	HMDB00875	645393024	1471024896	451688800	1118337024	943143936	1282474240	344525280	1321152512
	Pantothenate and CoA Metabolism	pantothenate	1508	LC/MS Neg	1024	1498.7	218.103	137-08-6	6613	C00864	HMDB00210	25298410	19212484	9664910	9640441	8388747	4458560	40846352	29590096
	Riboflavin Metabolism	flavin mononucleotide (FMN)	15797	LC/MS Neg	100000251	2390	455.097	130-40-5	710	C00061	HMDB01520	49348	66658		48183	98972
		riboflavin (Vitamin B2)	1827	LC/MS Pos Early	500	2292	377.146	83-88-5	493570	C00255	HMDB00244	1484646	859990	69556	75413	209549	125403	1275268	673455
	Thiamine Metabolism	5-(2-Hydroxyethyl)-4-methylthiazole	27673	LC/MS Pos Early	100000098	2310	144.048	137-00-8	1136	C04294		1101248	2830562	2875949	4859757	1177064	1619892	200004	2403328
		thiamin (Vitamin B1)	5341	LC/MS Pos Early	873	3050	265.112	59-43-8	1130	C00378	HMDB00235	9744554	6466740	1017933	2715690	3799255	4625639	4764879	4574158
	Tocopherol Metabolism	alpha-tocopherol	1561	LC/MS Pos Late	1105	2522	430.378	59-02-9;10191-41-0	14985	C02477	HMDB01893	34108628	42519436	31859848	15648107	17622036	8107370	10129456	9005800
		alpha-tocopherol acetate	38288	LC/MS Pos Late	100002328	2702	490.425	7695-31-2	2117	C13202	HMDB34227	338125	1955882
		alpha-tocotrienol	37502	LC/MS Pos Late	100001979	1986	424.334	58864-81-6	5282347	C14153	HMDB06327	385639	78555	195302	290335	357762	360611
		delta-tocopherol	33418	LC/MS Pos Late	100001216	2259	402.349	119-13-1	92094	C14151	HMDB02902	690764	555253	1021879	1.7758e+06				98817
		gamma-tocopherol/beta-tocopherol	52473	LC/MS Pos Late	100008998	2384	416.364					10700045	11914881	23707256	31275164	9474967	6683414	1735160	5392793
		gamma-tocotrienol	37501	LC/MS Pos Late	100001981	1918	410.318	14101-61-2	5282349	C14155	HMDB12958	1138203	201773			1.02023e+06
	Vitamin B6 Metabolism	pyridoxal	1651	LC/MS Pos Early	491	2343	168.066	65-22-5	1050	C00250	HMDB01545	4478209	7287629	2324024	2919563	1891023	1910501	7570159	9079219
		pyridoxamine	2150	LC/MS Pos Early	568	2975	169.097	58052-48-5	1052	C00534	HMDB01431	13066582	11842366	1270667	2341915	1573282	2053975	5947241	12141429
		pyridoxate	31555	LC/MS Neg	100001121	2185	182.046	82-82-6	6723	C00847	HMDB00017	16650987	18324666	1455331	1756437	2392191	2410033	12616902	7927960
		pyridoxine (Vitamin B6)	608	LC/MS Pos Early	936	2442	170.081	58-56-0	1054	C00314	HMDB02075	10336276	10081991	5380094	3696911	2840436	2820306	3866544	10478472
Energy	Oxidative Phosphorylation	phosphate	42109	LC/MS Pos Early	461	576	98.9842	7664-38-2	1061	C00009	HMDB01429	124832888	123936560	21182750	22980314	35312992	34433692	199494752	136674192
	TCA Cycle	2-methylcitrate	37483	LC/MS Polar	90	4565.3	205.035	6061-96-7	439681	C02225	HMDB00379	3208649	2258899	2350218	6068095			11119077	4913359
	TCA Cycle	alpha-ketoglutarate	528	LC/MS Polar	93	2700	145.014	305-72-6;328-50-7;22202-68-2	51	C00026	HMDB00208	48019720	40646128	47593112	53529816	36212044	38831460	83060704	28067688
	TCA Cycle	citraconate/glutaconate	47076	LC/MS Polar	100006438	2600	129.019					7658613	11385208	4571616	10969638	3.83232e+06	6087980	3219769	6378325
	TCA Cycle	citrate	1564	LC/MS Neg	1124	582	191.02	77-92-9	311	C00158	HMDB00094	1897936384	2295864320	9280122880	7525538816	939535616	1236104192	4740619264	4320378880
	TCA Cycle	fumarate	1643	LC/MS Polar	330	3084	115.004	100-17-8	444972	C00122	HMDB00134	45467380	22880980	5132501	2769682	4520904	3438846	8005901	25085040
	TCA Cycle	isocitrate	12110	LC/MS Polar	1206	4400	191.02	20226-99-7	1198	C00311	HMDB00193	42763688	41509808	4719916544	6082580992	4766857	963890	1238919808	319133408
	TCA Cycle	isocitric lactone	54724	LC/MS Polar	100009239	2970	173.009	4702-32-3	98259			15410387	26985912	1771848576	2093757696	1303873	3313969	36519996	30265248
	TCA Cycle	itaconate	18373	LC/MS Polar	100000455	2969	129.019	97-65-4	811	C00490	HMDB02092	2483291	6613650	3438353	1846678	1915198	3841447	670546	6028809
	TCA Cycle	malate	1303	LC/MS Neg	409	615.6	133.014	6915-15-7	525	C00149	HMDB00156	222583456	73944984	681504640	833543552	586503680	104406520	864524992	89990952
	TCA Cycle	mesaconate (methylfumarate)	18493	LC/MS Polar	100000446	3000	129.019	498-24-8	638129	C01732	HMDB00749		1196366	35114476	42466280	534609		1966811	2099446
	TCA Cycle	oxaloacetate	47173	LC/MS Neg	447	575	130.999	328-42-7	970	C00036	HMDB00223	100619464	86899872	125313160	166727024	2331006	3662861	274646976	236673344
	TCA Cycle	succinate	1437	LC/MS Polar	252	3149	117.019	110-15-6	1110	C00042	HMDB00254	220796384	213537072	89517264	63260048	153173872	90171800	281443104	171922288
	TCA Cycle	succinylcarnitine (C4-DC)	37058	LC/MS Pos Early	100001948	2291	262.129	256928-74-2			HMDB61717	5122847	2910889	1654385		7053878	4796147	5.16275e+06
Lipid	Carnitine Metabolism	carnitine	15500	LC/MS Pos Early	100000007	1978	162.112	461-05-2	10917	C00318	HMDB00062	110438976	99043096	3558451	4723771	19203952	18889348	297432096	145144288
		deoxycarnitine	36747	LC/MS Pos Early	100001662	2052	146.118	6249-56-5	134	C01181	HMDB01161	57688624	50115496	683171	5137326	9451963	11738174	97015824	56611468
	Ceramides	ceramide (d18:1/20:0, d16:1/22:0, d20:1/18:0)*	57440	LC/MS Pos Late	100015755	3920	594.582					651835	586863	246475	406456	755565	726961	867049	407589
	Diacylglycerol	diacylglycerol (12:0/18:1, 14:0/16:1, 16:0/14:1) [2]*	55001	LC/MS Pos Late	100010959	2716	556.494					4342827	4907622	1213050	3256452	3866202	4794990	3469626	2958865
		diacylglycerol (14:0/18:1, 16:0/16:1) [1]*	54953	LC/MS Pos Late	100010934	3057	584.525					259438	323497	271970	304381	1834873	1277645	108335	77129
		diacylglycerol (14:0/18:1, 16:0/16:1) [2]*	54954	LC/MS Pos Late	100010935	3183	584.525					2480059	3105291	1798168	3159128	1859783	2261592	1288343	1291690
		diacylglycerol (16:1/18:2 [2], 16:0/18:3 [1])*	54966	LC/MS Pos Late	100010940	2733	608.525					1582365	1530651	2663153	3369448	1322262	1956193	556657	1564001
		linolenoyl-linolenoyl-glycerol (18:3/18:3) [1]*	54951	LC/MS Pos Late	100010932	2229	630.509					1.37415e+06	1420078	7171689	4578252		1818031	607806	2.13114e+06
		linolenoyl-linolenoyl-glycerol (18:3/18:3) [2]*	54952	LC/MS Pos Late	100010933	2268	630.509					10168841	4796499	9261994	16380399	220710	1931870	2893626	9052496
		linoleoyl-linolenoyl-glycerol (18:2/18:3) [1]*	54963	LC/MS Pos Late	100010926	2426	632.525					6828775	5733806	40457360	33939080	5150953	4992671	1260376	3921974
		linoleoyl-linolenoyl-glycerol (18:2/18:3) [2]*	54964	LC/MS Pos Late	100010927	2478	632.525					22932628	10780180	43088432	117109248	2883177	3715516	9285513	19348558
		linoleoyl-linoleoyl-glycerol (18:2/18:2) [1]*	54968	LC/MS Pos Late	100010941	2689	634.541					67482688	53260048	124667336	111987144	111181264	50308264	5316381	8738532
		oleoyl-arachidonoyl-glycerol (18:1/20:4) [1]*	54960	LC/MS Pos Late	100010936	2907	660.556					277878	212085	225445	209841	1087261	929940	73688
		oleoyl-arachidonoyl-glycerol (18:1/20:4) [2]*	54961	LC/MS Pos Late	100010937	2990	660.556					1418456	1279324	837280	1404476	960278	1406220	671554	650059
		oleoyl-linoleoyl-glycerol (18:1/18:2) [1]	46798	LC/MS Pos Late	100002989	3115	636.556	106292-55-1				6588769	6556744	15199769	13986926	32349592	16981450	810227	1328914
		oleoyl-linoleoyl-glycerol (18:1/18:2) [2]	46799	LC/MS Pos Late	100002990	3223	636.556	104346-53-4				21285616	19668706	24010006	71520272	29545322	16950892	4385516	9759822
		oleoyl-oleoyl-glycerol (18:1/18:1) [1]*	54945	LC/MS Pos Late	100010918	3571	638.572					894288	2255256		934463	9214735	6579729	199042
		oleoyl-oleoyl-glycerol (18:1/18:1) [2]*	54946	LC/MS Pos Late	100010919	3695	638.572					11445754	9879634	4226481		11772712	7520788	2128989	1.67023e+06
		palmitoleoyl-linoleoyl-glycerol (16:1/18:2) [1]*	54967	LC/MS Pos Late	100010930	2664	608.525					1196141	1289239	1508514	1325980	3255803	1.76561e+06	230024	198519
		palmitoyl-arachidonoyl-glycerol (16:0/20:4) [2]*	54958	LC/MS Pos Late	100010925	3015	634.541					615944	495853	231759	429003	314106	360631	193621	123496
		palmitoyl-linolenoyl-glycerol (16:0/18:3) [2]*	54965	LC/MS Pos Late	100010939	2834	608.525					3940343	2465369	4911432	14856609	736931	1350796	925611	5005519
		palmitoyl-linoleoyl-glycerol (16:0/18:2) [1]*	52633	LC/MS Pos Late	100009052	3080	610.541		9543695		HMDB05207,HMDB07103	6150350	4282838	9497700	10957428	10181543	6806967	288792	1484880
		palmitoyl-linoleoyl-glycerol (16:0/18:2) [2]*	52634	LC/MS Pos Late	100009055	3197	610.541					19378788	13877112	17139756	61458348	9396188	7635671	3.21338e+06	10003026
		palmitoyl-myristoyl-glycerol (16:0/14:0) [2]	57364	LC/MS Pos Late	100015610	3180	558.509					1122620	1397030	828905	1526535	953343	1206129	742771	654294
		palmitoyl-oleoyl-glycerol (16:0/18:1) [1]*	54943	LC/MS Pos Late	100010916	3562	612.556					800803	801391	972941	878042	6256502	3906991
		palmitoyl-oleoyl-glycerol (16:0/18:1) [2]*	54942	LC/MS Pos Late	100010917	3695	612.556					7.18921e+06	6842312	5985502	10736801	6580870	6421826	4010232	4.15432e+06
		palmitoyl-palmitoyl-glycerol (16:0/16:0) [2]*	54990	LC/MS Pos Late	100010948	3734	586.541					2239346	2032869	1995202	3304426	2.06786e+06	2210188	1459920	1322122
	Endocannabinoid	linoleoyl ethanolamide	52608	LC/MS Neg	100006726	6150	322.275	68171-52-8	5283446		HMDB12252	28696350	25580326	6545830	3.79516e+06	6301431	5384268	786047	219244
		oleoyl ethanolamide	38102	LC/MS Neg	1137	6450	324.291	11-58-0;111-58-0	5283454		HMDB02088	3362900	5368548	2657521	1268509	3970832	3616231	836896	268928
		palmitoyl ethanolamide	38165	LC/MS Neg	1489	6300	298.275	544-31-0	4671	C16512	HMDB02100	1316574	2860709	895016	1154251	1823764	2563121	418661	291919
		stearoyl ethanolamide	38625	LC/MS Pos Late	100002254	1787	328.321	111-57-9	27902		HMDB13078	616706	816963	940185	947970	800946	750274	460745	872228
	Fatty Acid Metabolism (Acyl Choline)	linoleoylcholine*	57463	LC/MS Pos Late	100015760	1388	366.337					564242	575972	2253111	184189	2.65931e+06	1549027	99901	198098
		oleoylcholine	53260	LC/MS Pos Late	100009331	1449	368.352					116113	200875	1111215	88511	3.6896e+06	1212483		125603
		palmitoylcholine	52944	LC/MS Pos Late	100009233	1482	342.337		151731			468788	682187	604837	188173	1582327	663308		218532
		stearoylcholine*	57464	LC/MS Pos Late	100015759	1520	370.368						67925			188915	56629
	Fatty Acid Metabolism (also BCAA Metabolism)	butyrylcarnitine (C4)	32412	LC/MS Pos Early	100001054	2860	232.154	25576-40-3	439829	C02862	HMDB02013	4754198	3438917					8598857	4615519
		methylmalonate (MMA)	1496	LC/MS Polar	418	3078.4	117.019	516-05-2	487	C02170	HMDB00202	826027	649811	638458	609238	335186		2950276	791227
		propionylcarnitine (C3)	32452	LC/MS Pos Early	100001162	2590	218.139	17298-37-2	107738	C03017	HMDB00824	28525850	27291078		338757	2992279	3817702	70957320	39673700
	Fatty Acid Metabolism(Acyl Carnitine)	3-hydroxybutyrylcarnitine (1)	43264	LC/MS Pos Early	100003926	2400	248.149		53481617		HMDB13127	1192709	1.04026e+06		89064	458219	548776	3224268	1821507
		3-hydroxybutyrylcarnitine (2)	52984	LC/MS Pos Early	100009271	2340	248.149					1382762	1502751		151974	476069	211919	4256731	2435679
		acetylcarnitine (C2)	32198	LC/MS Pos Early	100000802	2282	204.123	5080-50-2	1	C02571	HMDB00201	253589488	270917856	2193081	4334793	35066988	41084004	658399424	387206464
		margaroylcarnitine*	57512	LC/MS Pos Late	100004054	1424	414.358	106182-29-0
		octanoylcarnitine (C8)	33936	LC/MS Pos Late	100001247	950	288.217	3671-77-0	123701	C02838	HMDB00791	239520	142806					215293	131433
		palmitoylcarnitine (C16)	44681	LC/MS Pos Late	100000776	1425	400.342	6865-14-1	461	C02990	HMDB00222	47628	58188	157698	39635			79393
	Fatty Acid Synthesis	malonate	15872	LC/MS Neg	818	612	103.004	141-82-2;26522-22-85-0	867	C00383	HMDB00691	48491600	62053204	12409685	13433738	95101280	23503300	13704190	14292374
	Fatty Acid, Branched	15-methylpalmitate	38768	LC/MS Neg	100002945	5695	269.249		17903417			12393154	9832246	2638609	3478388	9855511	15349831	4221571	1373951
	Fatty Acid, Dicarboxylate	2-hydroxyglutarate	37253	LC/MS Polar	100002070	3352.8	147.03	40951-21-1	43	C02630	HMDB00606	73004728	89107632	45930636	28745686	48785024	22312040	99013784	75975072
		3-carboxyadipate	54723	LC/MS Polar	100009325	4135	189.04	923-42-2	222467			1270643	659586	460161	1063025	739631	285041	949855	307020
		adipate	21134	LC/MS Polar	100000863	3000	145.051	124-04-9	196	C06104	HMDB00448	439902		1977924	1469910	521294		1348522	1135252
		azelate (nonanedioate)	18362	LC/MS Neg	2029	1276	187.098	123-99-9	2266	C08261	HMDB00784	1636191	1977928	1137306	443479	4664876	2075840	406595	429696
		dodecanedioate	32388	LC/MS Neg	100001102	2990	229.145	693-23-2	12736	C02678	HMDB00623	201139	243254	145230		203012	108652	67476	181360
		hexadecanedioate	35678	LC/MS Neg	100001614	4615	285.207	505-54-4	10459	C19615	HMDB00672	293647	169932	239062	246116	265729	80762	94156	81362
		maleate	20676	LC/MS Polar	100000707	2510	115.004	110-16-7	444266	C01384	HMDB00176	2576901	6242786	2662502	2744965	1874804	1687907	1636238	1034246
		sebacate (decanedioate)	32398	LC/MS Neg	100001211	1788	201.113	111-20-6	5192	C08277	HMDB00792	387156	373082	280073	149059	687790	407848	119739	153530
		suberate (octanedioate)	15730	LC/MS Neg	100000016	804.3	173.082	505-48-6	10457	C08278	HMDB00893	761880	1117763	610336	386564	899601	665964		241939
		undecanedioate	42395	LC/MS Neg	100001617	2440	215.129	1852-04-6	15816		HMDB00888	469679	524917	250780	195174	544668	291047	212727	171455
	Fatty Acid, Dihydroxy	12,13-DiHOME	38395	LC/MS Neg	62	5137	313.238	263399-35-5	10236635	C14829	HMDB04705	19740484	12526631	10859548	1953164	13740996	3494584	661401	551966
		9,10-DiHOME	38399	LC/MS Neg	179	5180	313.238	263399-34-4	9966640	C14828	HMDB04704	7590135	5143345	6262005	1106117	16671285	3429069	366877	405096
	Fatty Acid, Monohydroxy	13-HODE + 9-HODE	37752	LC/MS Neg	100002196	5275	295.228		43013			66324584	64272152	35611864	6940038	153731296	84286184	2.94667e+06	5941170
		16-hydroxypalmitate	39609	LC/MS Neg	100002953	5236.2	271.228	506-13-8	10466	C18218	HMDB06294	1723865	1913257	1214160	757008	2134206	988252	256213	639657
		2-hydroxydecanoate	42489	LC/MS Neg	100004089	4840	187.134	5393-81-7	21488			139835	142329		148417	92164	164648	99929
		2-hydroxyoleate	54920	LC/MS Neg	100010866	5560	297.244	56472-29-8	9796304			1367361	1697189	243869	283654	137287696	923506
		2-hydroxypalmitate	35675	LC/MS Neg	100001579	5511.2	271.228	764-67-0	92836		HMDB31057	12551112	10566911	1808381	1576243	153932704	2723711	965315	818660
		2-hydroxystearate	17945	LC/MS Neg	1239	5695	299.259	629-22-1	69417	C03045		1772911	1701531	1.66937e+06	371871	7228673	1123881	684387	334772
		3-hydroxydecanoate	22053	LC/MS Neg	100000997	4634.7	187.134	5561-87-5	26612		HMDB02203	2977322	4313445	3779068	2188992	668538	1700934	2366125	3561218
		3-hydroxyhexanoate	53230	LC/MS Neg	100006367	1725	131.071	10191-24-9	151492			199932	145547	272312		109460	129767	5.3978e+06	1097177
		3-hydroxylaurate	32457	LC/MS Neg	100001112	5175	215.165	53941-38-1	94216		HMDB00387	448255	424337	338590	218384	1.72047e+06	2182082	326050	441296
		3-hydroxyoctanoate	22001	LC/MS Neg	100000773	3446	159.103	88930-08-9	26613		HMDB01954	322522	408794	473110	224323	384532	359777	584414	327424
		8-hydroxyoctanoate	21239	LC/MS Neg	100000956	2300.4	159.103	764-89-6	69820			295892	342368	221782	194116	747737	450596		49302
	Glycerolipid Metabolism	digalactosylglycerol*	57346	LC/MS Neg	100003065	781	415.146					2.07749e+06	3.72924e+06	557934	3996533	4634374	3493214	1516470	5386796
		galactosylglycerol*	57345	LC/MS Polar	100003064	2518	299.098	16232-91-0	16048618			2145766	1587933	738580	608598	661831	482809	7742013	5040043
		glycerol	15122	LC/MS Neg	1254	758	91.0401	56-81-5	753	C00116	HMDB00131	17020772	14530302	17225140	7477686	22905664	14737594	4355041	2762287
		glycerol 3-phosphate	43847	LC/MS Pos Early	100000258	580	173.021	29849-82-9	754	C00093	HMDB00126	23500250	19240512	3384053	3912518	10487904	7768578	9609520	16449987
		glycerophosphoglycerol	48857	LC/MS Polar	100001619	2430	245.043		439964	C03274		6682920	10768581	19169372	9046939	9737085	3740354	22481412	15841704
	Glycolipid Metabolism	1,2-dilinolenoyl-galactosylglycerol (18:3/18:3)*	54891	LC/MS Pos Late	100010877	2046	792.562		5282287	C13871		54708284	55759728	34145096	4235862	942241	4616772	6015614	11399979
		1,2-dilinoleoyl-digalactosylglycerol (18:2/18:2)*	54897	LC/MS Pos Late	100010873	2256	958.646					80296792	40027132	14430906	18347924	1385918	2328302	906059	4207199
		1,2-dilinoleoyl-galactosylglycerol (18:2/18:2)*	54899	LC/MS Pos Late	100010879	2415	796.593		6535011			150949632	81543184	20723452	16867736	1433241	5678404	3922804	14303298
		1-linoleoyl-2-linolenoyl-galactosylglycerol (18:2/18:3)*	54898	LC/MS Pos Late	100010878	2209	794.578					31908444	25283950	23008470	7702540	413956	4274706	1262505	7361626
		1-palmitoyl-2-linolenoyl-galactosylglycerol (16:0/18:3)*	54900	LC/MS Pos Late	100010894	2455	770.578					7.10486e+06	5007511	1455167	1663181	226459	406674	1354566	2725564
		1-palmitoyl-2-linoleoyl-digalactosylglycerol (16:0/18:2)*	54887	LC/MS Pos Late	100010874	2498	934.646					51588816	26591434	12894398	17941350	1423197	1287422	958073	6382076
		1-palmitoyl-2-linoleoyl-galactosylglycerol (16:0/18:2)*	54901	LC/MS Pos Late	100010893	2731	772.593					38897140	24010606	3.63306e+06	4478224	830664	1136896	751764	5128777
	Inositol Metabolism	inositol 1-phosphate (I1P)	43849	LC/MS Polar	370	4785	259.022	573-35-3;106032-59-1	440194	C04006	HMDB00213		362775		157364	271453		892069	518539
		inositol pentakisphosphate	38388	LC/MS Neg	100002880	522	578.888		439468	C01284	HMDB03529			20400
		inositol triphosphate	38389	LC/MS Neg	100002881	541	418.955		439455	C01243	HMDB01143			83221	57465
		myo-inositol	1124	LC/MS Polar	363	3506.3	225.062	87-89-8	892	C00137	HMDB00211	140048816	155080064	59067124	48596864	37175156	26397770	293741504	161340864
		pinitol	37086	LC/MS Polar	100001860	2039.6	239.077	10284-63-6	164619	C03844	HMDB34219					36179072	12794148
	Ketone Bodies	3-hydroxybutyrate (BHBA)	542	LC/MS Polar	254	1443.3	103.04	625-72-9	441	C01089	HMDB00357	609057	632103	1.03968e+06	392630		140170	4394501	2794206
	Long Chain Fatty Acid	10-heptadecenoate (17:1n7)	33971	LC/MS Neg	100001278	5555	267.233	29743-97-3	5312435		HMDB60038	6373045	9181520	2733267	2498131	14583483	8485068	2768918	2069008
		10-nonadecenoate (19:1n9)	33972	LC/MS Neg	100001277	5780	295.264	73033-09-7	5312513		HMDB13622	1.21839e+06	1.03903e+06	769108	670325	2.13578e+06	1531245	475764	85033.5
		arachidate (20:0)	1118	LC/MS Neg	893	6295	311.296	506-30-9	10467	C06425	HMDB02212	15609918	18727000	10708136	9695633	80958136	42400688	9045247	2360151
		behenate (22:0)*	12125	LC/MS Neg	314	6745	339.327	112-85-6	8215	C08281	HMDB00944	3620615	4869729	3844524	3504819	33704696	12026287	2600592	669447
		eicosenoate (20:1)	33587	LC/MS Neg	100001335	5950	309.28		5282768		HMDB02231	7206533	6584242	11679195	3622954	49590736	24740792	5.86722e+06	551753
		erucate (22:1n9)	1552	LC/MS Neg	1087	6355.6	337.311	112-86-7	5281116	C08316	HMDB02068	463700	652732	433893	431314	2966905	1593445	232432
		margarate (17:0)	1121	LC/MS Neg	891	5731	269.249	506-12-7	10465		HMDB02259	12631253	15233761	6754858	8664820	18440770	16565781	7815298	2817527
		myristate (14:0)	1365	LC/MS Neg	519	5440	227.202	544-63-8	11005	C06424	HMDB00806	119559288	145816272	16586262	28157528	184825472	267728816	31510890	14036604
		myristoleate (14:1n5)	32418	LC/MS Neg	100001198	5346.9	225.186	544-64-9	5281119	C08322	HMDB02000	13466523	16390391	1960945	3063956	12798047	25976760	2303737	2638859
		nervonate (24:1n9)*	52674	LC/MS Neg	100001231	6804	365.342	506-37-6	5281120	C08323	HMDB02368	399295	153762	146556	238506	883176	471850
		nonadecanoate (19:0)	1356	LC/MS Neg	892	6068	297.28	646-30-0	12591	C16535	HMDB00772	1.9575e+06	2559079	1715846	1.42373e+06	3557077	3011289	1251772	515497
		oleate/vaccenate (18:1)	52285	LC/MS Neg	100008930	5655	281.249					465797536	652223680	615541824	192361904	3491065600	2215681792	187842784	43488864
		palmitate (16:0)	1336	LC/MS Neg	424	5618	255.233	57-10-3	985	C00249	HMDB00220	1083799808	1251900672	670449856	467509408	2460353792	2033947776	417486336	142026048
		palmitoleate (16:1n7)	33447	LC/MS Neg	452	5475	253.217	373-49-9	445638	C08362	HMDB03229	36574144	47181084	13143873	6.77254e+06	62924828	54114652	7832610	6.64645e+06
		stearate (18:0)	1358	LC/MS Neg	439	5872	283.264	57-11-4	5281	C01530	HMDB00827	654275968	685053184	390253600	467847520	1035787136	998353984	421754464	171590752
	Lysolipid	1-linolenoyl-GPA (18:3)*	52693	LC/MS Neg	100009084	5420	431.22					1229602	906718	927443			98206
		1-linolenoyl-GPC (18:3)*	45951	LC/MS Pos Late	100005350	1422	518.324					49581044	17737612	3935596	6310992	918384	2736273	1918686	5687033
		1-linoleoyl-GPA (18:2)*	52690	LC/MS Neg	100009082	5483	433.236				HMDB07856	5120574	7.41149e+06	1358400	285689	976890	972988	371049	149281
		1-linoleoyl-GPC (18:2)	34419	LC/MS Pos Late	100001395	1465	520.34		11988421	C04100	HMDB10386	614575232	375927360	85886288	52037988	34156652	34490488	8173333	13390159
		1-linoleoyl-GPE (18:2)*	36600	LC/MS Pos Late	100001570	1482	478.293		52925130		HMDB11507	44125504	30632096	14003978	13348990	5713908	5735300	864447	4192736
		1-linoleoyl-GPG (18:2)*	54885	LC/MS Neg	100009227	5516	507.273					19908132	10979601	2756149	2258276	3.44891e+06	2376506
		1-linoleoyl-GPI (18:2)*	36594	LC/MS Neg	100001778	5494	595.289					8160081	14387487	4.09679e+06	6209350	7269263	4634038	671692	139038
		1-linoleoyl-GPS (18:2)*	43676	LC/MS Neg	100004606	5500	520.268					1898845	1552521	577621	702769	326120	204349
		1-oleoyl-GPA (18:1)	36812	LC/MS Neg	100001671	5615	435.252	325465-93-8	5497152			726890	1205092	1814810	186765			477625
		1-oleoyl-GPC (18:1)	48258	LC/MS Pos Late	100001272	1540	522.355	19420-56-5	16081932		HMDB02815	79270000	44845032	42343620	28639822	15722121	12101952	12177291	13068515
		1-oleoyl-GPE (18:1)	35628	LC/MS Pos Late	100001569	1554	480.308	89576-29-4	9547071		HMDB11506	4257969	3210722	4314144	5913209	1159807	948852	801221	2819644
		1-oleoyl-GPG (18:1)*	45968	LC/MS Neg	100005716	5610	509.288					5122931	4236386	1043986	906923	275929	890226
		1-oleoyl-GPI (18:1)*	36602	LC/MS Neg	100001777	5599	597.305					515810	1613063	1108124	1887922	1948284	1481953	535952
		1-palmitoleoyl-GPC (16:1)*	33230	LC/MS Pos Late	100001511	1450	494.324		24779461		HMDB10383	4278711	2.49822e+06	2475329	627691	190607	240199	232903	395468
		1-palmitoyl-GPA (16:0)	34428	LC/MS Neg	100001445	5600	409.236	17618-08-5	6419701	C04036	HMDB00327	2837214	3596314	1077031	640068	927178	1128164	559259	308574
		1-palmitoyl-GPC (16:0)	33955	LC/MS Pos Late	100001263	1525	496.34	17364-16-8	86554		HMDB10382	389335488	217806432	110315880	56737608	54304780	45452344	19792806	22592480
		1-palmitoyl-GPE (16:0)	35631	LC/MS Pos Late	100001567	1544	454.293	53862-35-4	9547069		HMDB11503	16408509	12139115	11223096	10846833	5196290	4394353	1.72385e+06	9527395
		1-palmitoyl-GPG (16:0)*	45970	LC/MS Neg	100005717	5570	483.273		3300276			53511744	43178332	11322822	19314578	12478160	15894543	1301819	1093268
		1-palmitoyl-GPI (16:0)	35305	LC/MS Neg	100001655	5564	571.289				HMDB61695	6634579	12694879	3102288	10326218	4804110	4671206	2489705	887618
		1-stearoyl-GPC (18:0)	33961	LC/MS Pos Late	100001271	1606	524.371	19420-57-6	497299		HMDB10384	9161558	4855048	3147030	3413321	3.87153e+06	1.76468e+06	2718670	1400889
		1-stearoyl-GPE (18:0)	42398	LC/MS Pos Late	100001461	1626	482.324	69747-55-3	9547068		HMDB11130	545355	481899	392712	655612	113317		349478	346857
		1-stearoyl-GPG (18:0)	34437	LC/MS Neg	100001462	5816	511.304					1114424	581864	124617	210977
		1-stearoyl-GPI (18:0)	19324	LC/MS Neg	100000656	5794.3	599.32	796963-93-4			HMDB61696	232169	485320	349910	933286	223866	257883	752845
		2-palmitoleoyl-GPC (16:1)*	35819	LC/MS Pos Late	100001561	1425	494.324					313580	102668	394187	161940				311121
		2-palmitoyl-GPC (16:0)*	35253	LC/MS Neg	100001562	6215	570.341		15061532		HMDB61702	12166941	7255882	1246909	1172498	1827609	1841114	384499
	Medium Chain Fatty Acid	5-dodecenoate (12:1n7)	33968	LC/MS Neg	100001232	5224	197.155	2430-94-6	5312378		HMDB00529	1146196	2085778		160763	1307466	2172461	137726	397685
		caprate (10:0)	1642	LC/MS Neg	888	5090.7	171.139	112-37-8	2969	C01571	HMDB00511	12409248	18631408	4067444	5872959	12638607	19861780	4747350	4.01289e+06
		caproate (6:0)	32489	LC/MS Neg	926	2713.7	115.076	142-62-1	8892	C01585	HMDB00535	2211838	2210053			1993084	3091443		1333875
		caprylate (8:0)	32492	LC/MS Neg	932	4362	143.108	124-07-2	379	C06423	HMDB00482	3930350	5708420	4185050	1912297	1906769	5663164	779084	2.00255e+06
		heptanoate (7:0)	1644	LC/MS Neg	925	3670	129.092	111-14-8	8094	C17714	HMDB00666	3843971	6156942	6657514	4022475	531413	3015057	4801976	12339557
		laurate (12:0)	1645	LC/MS Neg	181	5300	199.17	143-07-7	3893	C02679	HMDB00638	28670440	37913788	8449442	11223998	40040660	69360360	8014153	7.14857e+06
	Mevalonate Metabolism	3-hydroxy-3-methylglutarate	531	LC/MS Polar	112	2700	161.046	503-49-1	1662	C03761	HMDB00355	59410128	57397712	16182814	29700634	30162904	25767660	147613968	105085792
	Monoacylglycerol	1-linolenoylglycerol (18:3)	34393	LC/MS Neg	100001435	6214	277.217	124151-74-2	53480978		HMDB11569	13810492	10361879	2902393	4233218	2550259	4522941	1113644	459224
		1-linoleoylglycerol (18:2)	27447	LC/MS Neg	100001040	6477	279.233	2277-28-3	5283469			120444192	144619328	31490658	30435288	62536184	52827444	6234488	1544979
		1-margaroylglycerol (17:0)	34391	LC/MS Neg	100001429	6571	269.249	68002-72-2	107036			1407679	1308422	389415	561743	814491	766999
		1-myristoylglycerol (14:0)	35625	LC/MS Neg	100001618	6353.3	227.202	75685-84-6	79050	C01885	HMDB11561	15026441	14584624	1928850	4884355	18266222	16810596	850771
		1-oleoylglycerol (18:1)	21184	LC/MS Neg	100000924	6650	281.249	111-03-5	5283468		HMDB11567	81375200	79824560	17902746	18675854	56824240	34294588	10583843	2766889
		1-palmitoleoylglycerol (16:1)*	52431	LC/MS Neg	100008952	6094	253.217					4674771	3674086	2268611	902040	1924080	1707409	240141
		1-palmitoylglycerol (16:0)	21127	LC/MS Neg	100000827	6550	255.233	542-44-9	14900		HMDB31074	98782640	118220552	17719100	24905258	66209556	53864280	18730412	8543898
		1-pentadecanoylglycerol (15:0)	47898	LC/MS Neg	100001431	6200	241.217	104140-07-0	190750			1886741	1729616	360325	607811	1071236	1166188	378874
		2-linoleoylglycerol (18:2)	32506	LC/MS Neg	100000987	6250	279.233	3443-82-1	5365676		HMDB11538	20919542	38356200	34155116	7655257	6448985	6414738	2354045
		2-myristoylglycerol (14:0)	34383	LC/MS Neg	100001408	6230	227.202	27214-38-6	137938			5163599	2846286	810668	1312145	2031406	2.08648e+06	379272
		2-oleoylglycerol (18:1)	21232	LC/MS Neg	100000943	6500	281.249	3443-84-3	5319879			15941634	11227747	2627144	5243996	6374003	4172821	2.79746e+06	540778
		2-palmitoleoylglycerol (16:1)*	52432	LC/MS Neg	100008953	6016	253.217					1085745	652825	253694	158237	191225	217442
		2-palmitoylglycerol (16:0)	33419	LC/MS Neg	100001048	6400	255.233	23470-00-0	123409		HMDB11533	16067856	14794212	4987090	10481380	7769320	8218904	2597465	2163676
	Neurotransmitter	acetylcholine	18790	LC/MS Pos Early	1749	2220	146.118	60-32-1		C01996	HMDB00895	1176550	6046400	609281	3722864	7702734	10774253	183508	4902750
	Phospholipid Metabolism	1,2-dilinolenoyl-GPA (18:3/18:3)*	57329	LC/MS Pos Late	100009117	2100	710.476		9547161			1155705	866996	2887625	1112630	241529	2366669	888632	1321385
		1,2-dilinolenoyl-GPC (18:3/18:3)*	53179	LC/MS Pos Late	100009344	1800	778.538					106846624	75696544	2868435	21744868	371749	6928950	2611235	23969966
		1,2-dilinoleoyl-GPA (18:2/18:2)*	52680	LC/MS Pos Late	100009072	2530	714.507					6652371	8433172	15389042	9083469	7986036	11918657	6395514	7659259
		1,2-dilinoleoyl-GPC (18:2/18:2)	52603	LC/MS Pos Late	100008903	2006	782.569	998-06-1	5288075			208889808	278583296	67035580	251511152	87033632	81681952	31368796	191242240
		1,2-dilinoleoyl-GPE (18:2/18:2)*	53174	LC/MS Pos Late	100009217	2083	740.522		9546812			53921440	63096852	17159908	51910124	7687047	10067832	16460446	35556164
		1,2-dilinoleoyl-GPI (18:2/18:2)*	52734	LC/MS Pos Late	100009185	2388	876.56					387459	2555427	1442189	5029774	2548246	2414033	545619	2904681
		1,2-dioleoyl-GPE (18:1/18:1)	52609	LC/MS Pos Late	100008906	2485	744.554	4004-05-01	9546757			3.37661e+06	8.20756e+06	8747397	15473708	4.92892e+06	3.77512e+06	19398286	16654940
		1,2-dipalmitoyl-GPC (16:0/16:0)	19130	LC/MS Pos Late	100000657	2365	734.569	63-89-8	452110		HMDB00564	11070750	16129648	7103738	14990073	8026430	9468837	21678742	17130360
		1,2-dipalmitoyl-GPE (16:0/16:0)*	57341	LC/MS Pos Late	100009204	2498	692.522		11802774;445468				206046	375854	406053			316413	295556
		1,2-dipalmitoyl-GPG (16:0/16:0)	52625	LC/MS Pos Late	100000652	3157	740.544	200880-41-7	11846227			923343	1458563	414765	1059873		385571		1342989
		1-linoleoyl-2-linolenoyl-digalactosylglycerol (18:2/18:3)*	54896	LC/MS Pos Late	100010872	2073	956.63					12152340	7.96961e+06	5134320	4249800	460198	1.82567e+06	253246	2731263
		1-linoleoyl-2-linolenoyl-GPA (18:2/18:3)*	52695	LC/MS Pos Late	100009086	2300	712.491					1579368	2917549	4816450	3329985	915599	7013330	2.96392e+06	3807745
		1-linoleoyl-2-linolenoyl-GPC (18:2/18:3)*	53176	LC/MS Pos Late	100009343	1939	780.554					94263584	138045232	8869899	94296888	2036714	26600020	10562839	113867560
		1-oleoyl-2-linoleoyl-GPA (18:1/18:2)*	57348	LC/MS Pos Late	100009093	2800	716.522					3.52025e+06	4894349	8.26992e+06	3684909	8281542	9405545	3904590	4915755
		1-oleoyl-2-linoleoyl-GPC (18:1/18:2)*	52453	LC/MS Pos Late	100008981	2165	784.585					34477992	126579056	40205952	125392984	110795944	68425920	37793644	146521264
		1-oleoyl-2-linoleoyl-GPE (18:1/18:2)*	52687	LC/MS Pos Late	100009078	2270	742.538		9546753		HMDB05349	15124215	26606624	12221163	30313804	8752305	9107458	21500492	28837814
		1-oleoyl-2-linoleoyl-GPI (18:1/18:2)*	52451	LC/MS Polar	100008979	902	859.534					330942	766541	852554	2146298	1401087	1209289	418583	1.02747e+06
		1-palmitoleoyl-2-linolenoyl-GPC (16:1/18:3)*	53180	LC/MS Pos Late	100009345	1850	754.538					4252919	3.72114e+06	5306072	3601849		368724	203457	1619901
		1-palmitoyl-2-alpha-linolenoyl-GPC (16:0/18:3n3)*	52684	LC/MS Pos Late	100009076	2034	756.554					140817664	153163120	28889840	112286384	3486866	52830880	13312875	126966624
		1-palmitoyl-2-arachidonoyl-GPE (16:0/20:4)*	52464	LC/MS Pos Late	100008990	2198	740.522		9546800		HMDB05323	694844	761075	211007	465652		202187	1177926	791730
		1-palmitoyl-2-linolenoyl-GPA (16:0/18:3)*	52694	LC/MS Pos Late	100009089	2526	688.491					2587565	3305418	9876854	4267064	1443512	7134725	3651126	5236759
		1-palmitoyl-2-linoleoyl-GPA (16:0/18:2)*	52679	LC/MS Pos Late	100009070	2820	690.507		9547167		HMDB07860	8528980	10136067	17389334	10157219	7591541	12547551	6379298	8789798
		1-palmitoyl-2-linoleoyl-GPC (16:0/18:2)	42446	LC/MS Pos Late	1537	2160	758.569	40811-94-7	5287971			121255440	240470624	81711520	219867264	60532388	97458560	37200276	223107376
		1-palmitoyl-2-linoleoyl-GPE (16:0/18:2)	42449	LC/MS Pos Late	100001870	2275	716.522		9546747		HMDB05322	48756080	88043648	21843842	96295120	8601957	27540624	24726196	90033128
		1-palmitoyl-2-linoleoyl-GPG (16:0/18:2)	52628	LC/MS Polar	1543	717	745.503	322647-44-9				1427959	1978493	724581	1717869		806756	338804	1428029
		1-palmitoyl-2-linoleoyl-GPI (16:0/18:2)	52450	LC/MS Polar	1528	910	833.518					3306735	6927840	3542266	11568362	7121232	7499465	1491888	7350659
		1-palmitoyl-2-oleoyl-GPC (16:0/18:1)	52461	LC/MS Pos Late	1539	2358	760.585	26853-31-6;26853-31-6	6436017			32300702	127115456	81196368	172741184	68717976	72076128	68337688	171217024
		1-palmitoyl-2-oleoyl-GPE (16:0/18:1)	19263	LC/MS Pos Late	1526	2509	718.538	26662-94-2	5283496		HMDB05320	4535608	27830474	10390210	39060296	3896848	13470556	12397201	43052104
		1-palmitoyl-2-oleoyl-GPI (16:0/18:1)*	52669	LC/MS Polar	100009066	893	835.534					624300	1652008	1485119	3467191	3343801	2415663	808309	2216070
		1-palmitoyl-2-palmitoleoyl-GPC (16:0/16:1)*	52470	LC/MS Pos Late	100008984	2160	732.554					8794523	11174402	19080188	25268566	2773749	2922679	10563756	12392463
		1-palmitoyl-2-stearoyl-GPC (16:0/18:0)	52616	LC/MS Pos Late	100008921	2653	762.601	59403-51-9				1863714	2760123	960520	3561559	1740245	1784548	3652048	3159922
		1-stearoyl-2-linoleoyl-GPE (18:0/18:2)*	52446	LC/MS Pos Late	100008976	2522	744.554		9546749			12063716	15175255	2.66988e+06	9545909	2.5442e+06	3.58224e+06	9270619	7357945
		1-stearoyl-2-oleoyl-GPC (18:0/18:1)	52438	LC/MS Pos Late	100008904	2644	788.616	56421-10-4				4221078	11793629	7869815	31410852	9678127	9409443	7494650	17300374
		1-stearoyl-2-oleoyl-GPE (18:0/18:1)	42448	LC/MS Pos Late	100001856	2858	746.569					2578198	3685287	2136855	3713477	1566175	1627636	7001282	5164407
		choline	15506	LC/MS Pos Early	1256	1961	104.107	67-48-1	305	C00114	HMDB00097	1193304704	1249659392	586235200	774646720	1149562496	1095202816	963475904	1064118528
		glycerophosphoethanolamine	37455	LC/MS Pos Early	100001620	659	216.063	33049-08-0	123874	C01233	HMDB00114	11943825	19211182	9882505	7668688	9553670	5440311	35560624	26486822
		glycerophosphoinositol*	47155	LC/MS Polar	100001621	3850	333.059	16824-65-0				12826057	19237320	26769398	17344586	13159394	9268395	34611064	28855704
		glycerophosphorylcholine (GPC)	15990	LC/MS Pos Early	100000269	672	258.11	28319-77-9	71920	C00670	HMDB00086	340146144	805922752	134574672	123440848	495827168	305169984	925895680	728933504
		glycerophosphoserine*	57404	LC/MS Pos Early	100015666	577	260.053		3081457			850850	933204	1545748	1344277	390452	277559	1659314	1174115
		choline phosphate	34396	LC/MS Pos Early	267	700	184.073	72556-74-2	1014	C00588	HMDB01565	149994048	195479616	32754562	27126780	51087968	28906184	99419720	120915488
		phosphoethanolamine	1600	LC/MS Neg	1026	638	140.012	1071-23-4	1015	C00346	HMDB00224	1802484	1781638	570253	405849	228592	315445	2472972	2947090
		trimethylamine N-oxide	40406	LC/MS Pos Early	100003397	2100	76.0757	1184-78-7	1145	C01104	HMDB00925	5595693	6514122		587048	498462	430576	13391131	6707979
	Polyunsaturated Fatty Acid (n3 and n6)	dihomo-linoleate (20:2n6)	17805	LC/MS Neg	1231	5730	307.264	2091-39-6	6439848	C16525	HMDB05060	2142588	2112951	889702	640984	3344224	1975986	478980
		dihomo-linolenate (20:3n3 or n6)	35718	LC/MS Neg	100001739	5596	305.249	17046-59-2	5280581	C03242	HMDB02925	2600250	3.42694e+06	209939	466955	1545681	2167068	901094
		docosadienoate (22:2n6)	32415	LC/MS Neg	100001182	6034	335.296	7370-49-2	5282807	C16533	HMDB61714	426680	427357			168019
		linoleate (18:2n6)	1105	LC/MS Neg	180	5535	279.233	60-33-3	5280450	C01595	HMDB00673	1102128896	1056784192	810086272	239976064	3744726784	2248499968	75745896	15162145
		linolenate [alpha or gamma; (18:3n3 or 6)]	34035	LC/MS Neg	100001337	5450	277.217		5280934	C06426	HMDB03073	322153216	149919376	56626160	51834380	241207520	147192960	38523036	24998964
	Primary Bile Acid Metabolism	cholate	22842	LC/MS Neg	136	5165	407.28	81-25-4	221493	C00695	HMDB00619	222961	203812					1237596	303332
	Short Chain Fatty Acid	valerate	33443	LC/MS Neg	1136	1718	101.061	109-52-4	7991	C00803	HMDB00892								458072
	Sphingolipid Metabolism	behenoyl dihydrosphingomyelin (d18:0/22:0)*	57331	LC/MS Pos Late	100009026	3150	789.684					541893	612032	139827	292229	560024	465996	1535534	701400
		behenoyl sphingomyelin (d18:1/22:0)*	48492	LC/MS Pos Late	100006294	3083	787.669					4977899	9059208	1.01098e+06	7.32439e+06	9479022	8107705	13241242	13685135
		lignoceroyl sphingomyelin (d18:1/24:0)	57330	LC/MS Pos Late	100006298	3437	815.7	60037-60-7				1160671	1064904	255643	561880	1048254	1208938	3018644	1454015
		myristoyl dihydrosphingomyelin (d18:0/14:0)*	57365	LC/MS Pos Late	100009038	2060	677.559					1056942	1232745		501762	543607	786216	2.05636e+06	1286521
		N-palmitoyl-sphinganine (d18:0/16:0)	52604	LC/MS Pos Late	100009028	3090	540.535	5966-29-0	5283572		HMDB11760	936851	1148809	903985	608305	439034	347423	367589	276421
		N-palmitoyl-sphingosine (d18:1/16:0)	44877	LC/MS Pos Late	1518	2893	538.519	24696-26-2	5283564		HMDB04949	623237	563925	399388	663683	883725	628318	719065	285294
		palmitoyl dihydrosphingomyelin (d18:0/16:0)*	52434	LC/MS Pos Late	100008954	2290	705.591		9939965			1359676	1668880	258873	637239	624898	919697	2616590	1758012
		palmitoyl sphingomyelin (d18:1/16:0)	37506	LC/MS Pos Late	100002107	2168	703.575	6254-89-3	9939941			22342872	22791772	4.07789e+06	10951742	7883390	11017413	33726832	23481456
		phytosphingosine	1510	LC/MS Pos Late	469	1367	318.3	554-62-1	122121	C12144	HMDB04610	29630762	22496290	58335868	38209744	2.84008e+06	3327163	21410828	39608376
		sphingadienine*	57426	LC/MS Pos Late	100015643	1315	298.274	25696-03-1	6449795			4682971	9646350	29429964	1279308	4585293	4197488	1837884	1654124
		sphinganine	17769	LC/MS Pos Late	313	1413	302.305	3102-56-5	3126	C00836	HMDB00269	16440066	10194643	9373698	3074587	387985	317959	2967212	4358430
		stearoyl sphingomyelin (d18:1/18:0)	19503	LC/MS Pos Late	1538	2400	731.606	85187-10-6;85187-10-6	6453725	C00550	HMDB01348	1458656	2075742	422997	634922	971629	1342481	4659484	2142786
		sphingomyelin (d18:0/18:0, d19:0/17:0)*	57473	LC/MS Pos Late	100009027	2362	733.622					177819	244395			107026		536080	273275
		sphingomyelin (d18:0/20:0, d16:0/22:0)*	57476	LC/MS Pos Late	100015786	2600	761.653					911220	882767		370852	783811	781729	2603900	1109648
		sphingomyelin (d18:1/14:0, d16:1/16:0)*	42463	LC/MS Pos Late	100004328	1998	675.544		11433862			2405927	3104363	553725	1233406	1307650	1970106	4646873	3111776
		sphingomyelin (d18:1/15:0, d16:1/17:0)*	52433	LC/MS Pos Late	100006314	2082	689.559	121999-58-4				1883895	2123498	452641	792701	900400	1400405	3156905	2391874
		sphingomyelin (d18:1/17:0, d17:1/18:0, d19:1/16:0)	52615	LC/MS Pos Late	100008920	2312	717.591	121999-64-2				345084	241899		101067	163205	200130	647866	330915
		sphingomyelin (d18:1/19:0, d19:1/18:0)*	57475	LC/MS Pos Late	100015787	2330	745.622					191971	187613		79044	139472	100284	563519	270659
		sphingomyelin (d18:1/20:0, d16:1/22:0)*	48490	LC/MS Pos Late	100006290	2685	759.638					3.78539e+06	5111893	875135	2892285	2727855	3546459	7984695	6.94461e+06
		sphingomyelin (d18:1/21:0, d17:1/22:0, d16:1/23:0)*	52495	LC/MS Pos Late	100009025	2793	773.653					3164117	3507628	813429	1827140	2988221	3482924	9106089	4681211
		sphingomyelin (d18:1/22:1, d18:2/22:0, d16:1/24:1)*	48493	LC/MS Pos Late	100006295	2666	785.653					646045	809015		147654	466687	664613	1629902	1.27666e+06
		sphingomyelin (d18:1/24:1, d18:2/24:0)*	47153	LC/MS Pos Late	100005986	3033	813.684	94359-13-4					324052		576861	489163	473734	1307630	994861
		sphingomyelin (d18:2/16:0, d18:1/16:1)*	42459	LC/MS Pos Late	100004329	2002	701.559					422602	487667	319100	246621	147718	278969	647958	487009
		tricosanoyl sphingomyelin (d18:1/23:0)*	52436	LC/MS Pos Late	100008955	3200	801.684					2552343	1440041	429510	1024884	2106666	2400015	5916311	2867180
	Sterol	4-cholesten-3-one	38125	LC/MS Pos Late	100002227	2520	385.346	601-57-0	91477	C00599	HMDB00921	99043	104962	80854	102274	139745	132843
		beta-sitosterol	27414	LC/MS Pos Late	100001033	3054	397.383	83-46-5	222284	C01753	HMDB00852	3955977	3226043	3.48324e+06	4408294	2242242	2813675	2856872	3.8769e+06
		campesterol	33997	LC/MS Pos Late	100001269	2873	383.367	474-62-4	173183	C01789	HMDB02869	774165	667718	491094	461263	317736	235159	254071	471672
		ergosterol	27553	LC/MS Pos Late	100001020	2420	379.336	57-87-4	444679	C01694	HMDB00878	2508995	1982127
Nucleotide	Purine and Pyrimidine Metabolism	methylphosphate	37070	LC/MS Pos Early	100001805	544	113	7023-27-0	13130		HMDB61711	2801911	86601	120872		159968	67673	237959	263888
	Purine Metabolism, (Hypo)Xanthine/Inosine containing	2'-deoxyinosine	15076	LC/MS Neg	100000135	1688	251.079	890-38-0	65058	C05512	HMDB00071	1029374	369115
		allantoic acid	33434	LC/MS Neg	218	652	175.047	99-16-1	203	C00499	HMDB01209	3719067	1460897			518376	80113
		allantoin	1107	LC/MS Polar	1002	1672	157.037	97-59-6	204	C02350	HMDB00462	24754060	29137102	4371314	5738428	10073676	10495055	21193116	19072766
		hypoxanthine	3127	LC/MS Pos Early	171	1295	137.046	68-94-0	790	C00262	HMDB00157	10430565	9437430	2480614	2349147	18995866	1119051	22110256	20528984
		inosine	1123	LC/MS Pos Early	361	1269	269.088	58-63-9	6021	C00294	HMDB00195	5358105	2766656	409491	1171343	1546776	2240343	490959	1888685
		inosine 5'-monophosphate (IMP)	2133	LC/MS Polar	362	4267.7	347.04	4691-65-0	8582	C00130	HMDB00175
		urate	1604	LC/MS Pos Early	1134	776	169.036	69-93-2;120K5305	1175	C00366	HMDB00289	4276127	8349923	365666	357046	996110	2083009	12524722	7620817
		xanthine	3147	LC/MS Polar	1004	2023	151.026	69-89-6	1188	C00385	HMDB00292	9362022	10971229	828167	2240121	10653077	633026	275377	2624300
		xanthosine	15136	LC/MS Neg	100000299	1075	283.068	146-80-5	64959	C01762	HMDB00299	2051255	740846	290088	762434	1808398	748979		618518
	Purine Metabolism, Adenine containing	1-methyladenine	1527	LC/MS Pos Early	54	2133	150.077	5142-22-3	78821	C02216	HMDB11599	10084291	12442119	1057265	3410376	1549766	4326466	4555096	6538252
		N1-methyladenosine	15650	LC/MS Pos Early	1242	2120	282.12	15763-06-1	27476	C02494	HMDB03331	6422442	3.85954e+06						195791
		adenosine 2'-monophosphate (2'-AMP)	36815	LC/MS Neg	100001694	1497.7	346.056	130-49-4	94136	C00946	HMDB11617	941558	400576	157591	159994	191428	92240	56657	464241
		2'-deoxyadenosine	1553	LC/MS Pos Early	211	2252	252.109	16373-93-6	13730	C00559	HMDB00101	142018880	10497498	2503336	682206	1025186	1961391	1156640	2439073
		2'-O-methyladenosine	42607	LC/MS Pos Early	100004047	2375	282.12	2140-79-6	102213			22858776	4829375	721189	478276	328623	611698	529016	1054972
		adenosine 3'-monophosphate (3'-AMP)	35142	LC/MS Neg	100001449	1245	346.056	84-21-9	41211	C01367	HMDB03540	130911	1257993	165099		318235	107264
		adenine	554	LC/MS Pos Early	880	2221	136.062	73-24-5	190	C00147	HMDB00034	525068224	196354096	152664944	67410168	74315088	59629964	412671680	312824288
		adenosine	555	LC/MS Pos Early	798	2169	268.104	58-61-7	60961	C00212	HMDB00050	802800064	568499776	133427144	280177760	233504848	327239264	12546205	231601920
		adenosine 3',5'-cyclic monophosphate (cAMP)	2831	LC/MS Neg	207	1952.2	328.045	60-92-4	6076	C00575	HMDB00058	434029	650463			55271	114270	1320131	718925
		adenosine-2',3'-cyclic monophosphate	37467	LC/MS Neg	72	1793	328.045	37063-35-7	2024	C02353	HMDB11616	4313068	3064935	93870		2423495	234005
		adenosine 5'-monophosphate (AMP)	32342	LC/MS Pos Early	209	1013	348.07	149022-20-8	6083	C00020	HMDB00045	129981	97352808	5750869	16212479	6631397	5572562		480938
		N6,N6-dimethyladenosine	42081	LC/MS Pos Early	100003867	2415	296.135	2620-62-4	348206			1368246	208406
		N6-carbamoylthreonyladenosine	35157	LC/MS Neg	100001415	2164	411.127	24719-82-2	161466		HMDB41623	374135	296442	56913	81989	84246	35160	159085	153086
		N6-methyladenosine	37114	LC/MS Pos Early	213	2264	282.12	1867-73-8	102175		HMDB04044	3836613	2585680	85525	332265	256768	850207		745235
		N6-succinyladenosine	48130	LC/MS Pos Early	100001664	1930	384.115	4542-23-8			HMDB00912	913389	253799	999999	675671	345810	92229	108320	186849
	Purine Metabolism, Guanine containing	2'-deoxyguanosine	1411	LC/MS Neg	348	1751	266.089	961-07-9	187790	C00330	HMDB00085	3858615	482168			35388
		guanosine 5'- monophosphate (5'-GMP)	2849	LC/MS Polar	347	4400	362.051	5550-12-09	6804	C00144	HMDB01397		191933
		7-methylguanine	35114	LC/MS Pos Early	100001456	2175	166.072	578-76-7	11361	C02242	HMDB00897	7724520	9254196	620046	3367813	1.58923e+06	4477958	13319809	9981487
		7-methylguanosine	31580	LC/MS Pos Early	100001118	2214	298.115	20241-86-4				2520488	326185	83414					97744
		guanine	32352	LC/MS Pos Early	172	2032	152.057	73-40-5	764	C00242	HMDB00132	28569504	11309085	5771122	5470799	2890690	10677524	10193471	16244553
		guanosine	1573	LC/MS Pos Early	1099	1728	284.099	118-00-3	6802	C00387	HMDB00133	87044648	40146424	6769615	10664587	8472778	16829852	10206172	26443580
		guanosine 2'-monophosphate (2'-GMP)*	52442	LC/MS Neg	100002733	1241	362.051		444571			562000	258048	81374	74545	72827	37034	50846	200833
		guanosine 3'-monophosphate (3'-GMP)	39786	LC/MS Neg	100002704	773.9	362.051	117-68-0	3522			1805486	1166507	137159
		guanosine-2',3'-cyclic monophosphate	37139	LC/MS Neg	74	1480	344.04	15718-49-7	92823	C06194	HMDB11629	2617756	6.98839e+06	267457		1422349	260679
		N2,N2-dimethylguanosine	35137	LC/MS Pos Early	100001412	2210	312.13	2140-67-2	92919		HMDB04824	2669555	768718	99162		70414		769136	683475
	Pyrimidine Metabolism, Cytidine containing	2'-deoxycytidine	15949	LC/MS Pos Early	100000125	2193	228.098	951-77-9	13711	C00881	HMDB00014	8055172	4048360	506821	471370	272667	958702	964650	1350671
		cytidine 3'-monophosphate (3'-CMP)	2959	LC/MS Polar	105	4000	322.045	84-52-6	66535	C05822		3.83477e+06	4859402	91920	49062	335367	670984	92791	452019
		3-methylcytidine	35132	LC/MS Pos Early	100001466	2176	258.108	21028-20-6	159649			894808	711564						80399
		5-methyl-2'-deoxycytidine	38159	LC/MS Pos Early	100002300	2303	242.114	838-07-3	440055	C03592	HMDB02224	3558681	2353863	61914	402469		672274		650401
		5-methylcytidine	22119	LC/MS Neg	100000763	1608	256.094	2140-61-6	92918		HMDB00982	368458	326502				76869
		cytidine 5'-monophosphate (5'-CMP)	2372	LC/MS Polar	282	4500	322.045	63-37-6	6131	C00055	HMDB00095		1181909	660556	515087				350348
		cytidine	514	LC/MS Pos Early	827	2124	244.093	65-46-3	6175	C00475	HMDB00089	75790504	58411364	8954672	8.05124e+06	4592798	9596961	48057996	31225300
		cytidine 2',3'-cyclic monophosphate	37465	LC/MS Neg	73	937	304.034	15718-51-1	417654	C02354	HMDB11691	872631	2755442			1.57985e+06	1.81798e+06
		cytosine	573	LC/MS Pos Early	881	2060	112.051	71-30-7	597	C00380	HMDB00630	17043588	14320032	835846	1412143	13249194	6807255	2995743	1880575
	Pyrimidine Metabolism, Orotate containing	dihydroorotate	601	LC/MS Polar	923	1910	157.025	155-54-4	648	C00337	HMDB03349	5357110	7501897			296633	869432	16973474	10298043
		N-carbamoylaspartate	1594	LC/MS Polar	1108	3800	175.036	923-37-5	93072	C00438	HMDB00828	374427	444866		37973	32144	80536	1010239	609935
		orotate	1505	LC/MS Polar	445	1638.1	155.01	50887-69-9	967	C00295	HMDB00226	631419392	853035392	9554202	11685643	140004192	202541744	1396959360	900865024
	Pyrimidine Metabolism, Thymine containing	3-aminoisobutyrate	1566	LC/MS Pos Early	1114	2215	104.071	10569-72-9;214139-20-5	64956	C05145	HMDB03911	5626652	8041708	681468			476826	368509	1099073
		thymidine	2183	LC/MS Neg	872	1963.7	241.083	50-89-5	5789	C00214	HMDB00273	5707137	1201299	84214	191590	100934	443197	216377	254539
		thymine	604	LC/MS Neg	882	1654	125.036	65-71-4	1135	C00178	HMDB00262	599850	345343				85171	242638	142151
	Pyrimidine Metabolism, Uracil containing	2'-deoxyuridine	1412	LC/MS Polar	536	1100	273.073	951-78-0	13712	C00526	HMDB00012	2493191	450750				66974
		3-ureidopropionate	3155	LC/MS Pos Early	1053	875	133.061	462-88-4	111	C02642	HMDB00026	2199940	1367893	1797555	524451	405520	329383	1762696	2418776
		5-methyluridine (ribothymidine)	35136	LC/MS Neg	100001446	1778.1	257.078	1463-10-1	445408		HMDB00884	871714	319665			130537	65462	62618	56618
		beta-alanine	55	LC/MS Pos Early	244	1905	90.055	56-41-7;107-95-9	239	C00099	HMDB00056	22402122	23474640	20555298	17787764	6261409	5488030	20278132	21237646
		pseudouridine	33442	LC/MS Neg	821	1100	243.062	1445-07-4	15047	C02067	HMDB00767	5520562	2615994	215497	189330	348088	686643	1078021	707020
		uridine 5'-monophosphate (UMP)	2856	LC/MS Polar	869	4150	323.029	3387-36-8	6030	C00105	HMDB00288		7100449	576396	794888		80433
		uracil	605	LC/MS Polar	825	1089.7	111.02	66-22-8	1174	C00106	HMDB00300	6958529	5733319	322941	375886	1214291	984060	743517	375753
		uridine	606	LC/MS Neg	535	1457.6	243.062	58-96-8	6029	C00299	HMDB00296	68025152	33341432	7920098	11168597	8503494	8658492	16693739	15150208
		uridine 2'-monophosphate (2'-UMP)*	52444	LC/MS Neg	100008975	824	323.029					461742	191490			124400	98646
		uridine 3'-monophosphate (3'-UMP)	39764	LC/MS Polar	106	3800	323.029	35170-0-7;35170-03-7	101543	C01368		4005735	4427669	182182	110735	184055	396389		288815
		uridine-2',3'-cyclic monophosphate	37137	LC/MS Neg	75	1090	305.018	40632-52-8	439715	C02355	HMDB11640	1768300	3959241	105656		1522409	2743569
Peptide	Acetylated Peptides	phenylacetylglycine	33945	LC/MS Neg	100001275	2375	192.067	500-98-1	68144	C05598	HMDB00821	7.19443e+06	12731831	74110	178381	1312337	2115210	21902696	10349486
	Dipeptide	alanylleucine	37093	LC/MS Pos Early	100001890	3055	203.139	1638-60-4	259583		HMDB28691	613541	293309					382421	265245
		glycylleucine	34398	LC/MS Pos Early	100001258	3059	189.123	869-19-2	92843	C02155	HMDB00759	560050	252975			62771	61632
		glycylvaline	18357	LC/MS Pos Early	100000487	2734	175.108	1963-21-9	97417		HMDB28854	683311	124603			131337		110695
		isoleucylglycine	40008	LC/MS Neg	100003169	1992	187.109	868-28-0	342532			610196	536525	223797	125916			1268648	1257893
		leucylalanine	40010	LC/MS Pos Early	100003179	2801	203.139	7298-84-2	259321			583484	667866	632084	220542			2.06014e+06	3375230
		leucylglutamine*	48189	LC/MS Pos Early	100003183	2620	260.161		4305457			961598	811609	452948	191204	73575		1622692	2310780
		leucylglycine	40045	LC/MS Pos Early	100003185	2778	189.123	686-50-0	79070			933384	884297	368563	164990	108585	74351	1829682	3737738
		lysylleucine	40020	LC/MS Pos Early	100003196	3370	260.197	7369-79-1	4682588			927928	413122		117037	87223		58686	143400
		phenylalanylalanine	41374	LC/MS Pos Early	100003589	2909	237.123	3918-87-4	6993123;5488196			177155	191893	97270				314059	1021812
		phenylalanylglycine	41370	LC/MS Pos Early	100003588	2898	223.108	721-90-4	98207			161481	215926	100644				458657	857892
		prolylglycine	40703	LC/MS Pos Early	100003674	2136	173.092	2578-57-6	7408076;6426709			177402	312877			135068	144131	254540	259695
		valylglutamine	42079	LC/MS Pos Early	100003640	2295	246.145	42854-54-6	5253209			1183010	939685	417765		184268	90099	2692610	1694837
		valylglycine	40475	LC/MS Pos Early	100003641	2444	175.108	686-43-1	136487		HMDB29127	359714	504936	104782				1594993	2148448
		valylleucine	39994	LC/MS Pos Early	100003210	3138	231.17	22906-55-4	352039		HMDB29131	3.47002e+06	3029149	1539717	410228	432043	217408	3.27131e+06	2509652
	Dipeptide Derivative	carnosine	1768	LC/MS Pos Early	249	2942	227.114	305-84-0	439224	C00386	HMDB00033	390264	441369					629361	545628
	Gamma-glutamyl Amino Acid	gamma-glutamylalanine	37063	LC/MS Pos Early	100001843	1986	219.098	5875-41-2	440103		HMDB29142	1436842	1894502	3906747	2971689	1506288	1572362	233796	723079
		gamma-glutamyl-alpha-lysine	55015	LC/MS Pos Early	100010901	2784	276.155		65254			1177893	523933			451138
		gamma-glutamyl-epsilon-lysine	33934	LC/MS Pos Early	100001262	2717	276.155	17105-15-6	7015684;7015685		HMDB03869	427219				115380
		gamma-glutamylglutamate	36738	LC/MS Pos Early	331	1775	277.103	1116-22-9	92865	C05282	HMDB11737	7220882	5739503	602412	700295	2226795	1197502	126731	394255
		gamma-glutamylglutamine	2730	LC/MS Pos Early	1140	1430	276.119	10148-81-9	150914	C05283	HMDB11738	32394324	24106660	4867514	2163862	4924884	3.28303e+06	2921457	8958883
		gamma-glutamylglycine	33949	LC/MS Pos Early	100001294	1535	205.082	1948-29-4	165527		HMDB11667	11235468	2935073			867001	176822		183421
		gamma-glutamylhistidine	18245	LC/MS Pos Early	1235	2740	285.119	37460-15-4	7017195			4317843	3674145	84083	479488	4751604	1207802		1022073
		gamma-glutamylisoleucine*	34457	LC/MS Neg	100001485	1635	259.13		14253342		HMDB11170	5826941	7039830	165672	146791	1286947	1452950		171355
		gamma-glutamylleucine	18369	LC/MS Neg	1268	1685	259.13	2566-39-4	151023		HMDB11171	2691934	13357644	68378	11006396	819895	10150073		13658807
		gamma-glutamylmethionine	44872	LC/MS Pos Early	100001313	2640	279.101	17663-87-5	7009567		HMDB29155	20399812	50601340	157962	2728469	4948013	11060964		3006071
		gamma-glutamylphenylalanine	33422	LC/MS Neg	100000491	1825	293.114	7432-24-8	111299		HMDB00594	22821620	43758836		195115	42861836	6465944		248730
		gamma-glutamylthreonine	33364	LC/MS Pos Early	100001314	1750	249.108	5652-48-2			HMDB29159	1111126	333132			334516	52950		52347
		gamma-glutamyltryptophan	33947	LC/MS Neg	100001295	1960	332.125	66471-20-3	3989307		HMDB29160	751561	1263702		146637	1457465	254085		168463
		gamma-glutamyltyrosine	2734	LC/MS Neg	1102	1240	309.109	7432-23-7	94340		HMDB11741	274063	309367			14037274
		gamma-glutamylvaline	43829	LC/MS Pos Early	100001126	2700	247.129	2746-34-1	7015683		HMDB11172	12125076	20067136	1348688	2157693	2468748	4383735	197240	1838381
Xenobiotics	Benzoate Metabolism	2,4,6-trihydroxybenzoate	35892	LC/MS Neg	100001718	1574	169.014	83-30-7	66520			684823	77229	637884	405093	534165	190527	218936	151478
		2-hydroxyhippurate (salicylurate)	18281	LC/MS Neg	1869	2184	194.046	487-54-7	10253	C07588	HMDB00840	2770985	2816855		89103	464656	505269	3498710	2907083
		4-ethylphenylsulfate	36099	LC/MS Neg	100001756	3580	201.023	123-07-9		C13637		475778	717381			125128	45786	4195951	1686459
		4-hydroxybenzoate	21133	LC/MS Neg	100000862	820	137.024	99-96-7	135	C00156	HMDB00500	592486	860689	1286795	947381	2062643	994133	1274309	1221520
		4-methylcatechol sulfate	46146	LC/MS Neg	100004111	2665	203.002					1223790	2131616			184058	335459	4111976	2270300
		benzoate	15778	LC/MS Neg	100000008	1750	121.029	65-85-0	243	C00180	HMDB01870	1595295	1429938	14235569	33119714	2018841	1507870	7056450	1600444
		catechol sulfate	35320	LC/MS Neg	100001605	1906	188.986	4918-96-1	3083879	C00090	HMDB59724	1611533	2382024			234230	433059	5652867	2769453
		hippurate	15753	LC/MS Neg	100000014	2106.9	178.051	495-69-2	464	C01586	HMDB00714	59651268	81126096	638966	789493	9082714	13823880	84223712	87662296
		methyl-4-hydroxybenzoate	34386	LC/MS Neg	100001252	3671	151.04	99-76-3	7456	D01400	HMDB32572					3329859	943935
	Chemical	2-pyrrolidinone	31675	LC/MS Pos Early	100001081	1262	86.06	616-45-5	12025		HMDB02039	10191069	22135056	2.02299e+06	2685178	2699998	4906790	2137605	3133230
		3-hydroxypyridine	21169	LC/MS Pos Early	100000905	2292	96.0444	109-00-2	7971			3131234	14879509	794331	6834863	947497	6355382	523961	6159133
		3-hydroxypyridine sulfate	48448	LC/MS Neg	100006098	1595.5	173.987	1955-23-3				142078	117788					673975	271074
		dimethyl sulfone	43424	LC/MS Pos Early	100004284	832	95.0161	67-71-0	6213	C11142	HMDB04983	592423	784692	253721	218405	258707	286706	1104694	563156
		ectoine	35651	LC/MS Pos Early	100001635	1980	143.082	96702-03-3	126041	C06231		1380235	3495562	241871	2291866	845230	2527251	76658	2156507
		gentisic acid-5-glucoside	48729	LC/MS Neg	100006372	1434	315.072	1820-89-9	10914066			1498434	1079764	2838987	3587057	18151308	1359400	978144	1761012
		indole-3-acetamide	37448	LC/MS Pos Early	100002095	2306	175.087	879-37-8	397	C02693		3158046	2291820	186792
		O-sulfo-L-tyrosine	45413	LC/MS Neg	100005384	990	260.023		514186			390758	280433	65626	86162	228098	22138		144239
		sulfate*	46960	LC/MS Neg	100002528	616	96.9601	14808-79-8	1118	C00059	HMDB01448	63931500	75633040	19741598	24199896	45117884	32124518	24713044	25465792
	Drug	salicylate	1515	LC/MS Polar	501	802	137.024	69-72-7	338	C00805	HMDB01895	6101564	7.37391e+06	5886803	5664665	6374908	3.28574e+06	4200689	1452466
		salidroside	45419	LC/MS Neg	100005462	2534	299.114	10338-51-9	159278			663280	921783	471287	413715	2524562	729003	8740738	2448887
		S-carboxymethyl-L-cysteine	47897	LC/MS Pos Early	100002324	1490	180.033	638-23-3	1080	C03727	HMDB29415	6663904	6658486		325177	276562	244956	667672	981828
	Food Component/Plant	1,1-kestotetraose	39796	LC/MS Neg	100003047	1381	665.215	13133-07-8	166775		HMDB39176	32356996	89467904	204314	189088	10763467	13144940
		1,2-dilinolenoyl-digalactosylglycerol (18:3/18:3)	54892	LC/MS Pos Late	100009392	1941	954.615					18045976	13921622	11190477	4550004	1731469	4731878	2743433	6721033
		1-kestose	22012	LC/MS Polar	100000980	3970	549.167	470-69-9	440080	C03661	HMDB11729	13715125	31942960	6195236	6372791	16911398	18104370	8012370	10007668
		1-palmitoyl-2-linolenoyl-digalactosylglycerol (16:0/18:3)	54893	LC/MS Pos Late	100010875	2278	932.63					12300148	8264049	2859355	2767912	2097563	1368705	1211393	3559919
		2,3-dihydroxyisovalerate	38276	LC/MS Polar	100002417	1050	133.051	1756-18-9	677	C04039	HMDB12141	10777679	12616210	9975265	3810370	865464	873851	59602380	57910516
		2,8-quinolinediol sulfate	48691	LC/MS Neg	100004321	2612	239.997					23405842	29810716	267807	302564	5412919	7600300	50307712	34614648
		2-isopropylmalate	15667	LC/MS Polar	100000409	2605	175.061	3237-44-3	77	C02504	HMDB00402	80190824	114098432	34964620	17412390	41781804	5561223	174079712	182135072
		2-oxindole-3-acetate	40479	LC/MS Neg	100003109	2076	190.051	2971-31-5	3080590			214580	86614	147823	88898		67219
		abscisate	21156	LC/MS Neg	100000879	3170	263.129	14375-45-2	5280896	C06082	HMDB35140	515724	499039	7050479	4447846	128892	66808	2038101	1.71559e+06
		alliin	41494	LC/MS Neg	100003473	1003.3	176.039	556-27-4	87310	C08265	HMDB33592	4387503	304538
		apigenin	21189	LC/MS Neg	100000935	3845.4	269.046	520-36-5	5280443	C01477	HMDB02124	2904750	706183	567977		22273060	15963205
		apigenin 7-O-glucoside	37127	LC/MS Neg	100001903	3720	431.098	578-74-5	5280704	C04608	HMDB37340	1081616	142928			5707070	2019492
		azetidine-2-carboxylic acid	37068	LC/MS Pos Early	100001802	1040	102.055	2133-34-8	17288	C08267	HMDB29615	550483	4.17001e+06		572701	984392	2514356		699120
		beta-guanidinopropanoate	35101	LC/MS Pos Early	100001411	2145	132.077	353-09-3	67701	C03065	HMDB13222	5633633	3435070	1360074	1915349	1637895	1741032	2962926	3045064
		biochanin A	21181	LC/MS Neg	100000918	4681.8	283.061	491-80-5	5280373	C00814	HMDB02338					9104758
		caffeate	21177	LC/MS Neg	100000914	1165	179.035	331-39-5	689043	C01197	HMDB01964	10255166	11257699	6605934	1592737	30695024	9550938	5143037	9605296
		catechin	17668	LC/MS Neg	2068	2429	289.072	18829-70-4;225937-10-0	9064	C06562	HMDB02780	23826		3335079	3432750			17522644	7824343
		chlorogenate	34120	LC/MS Neg	100001349	1732	353.088	6001-76-9	5315832			27695158	24255494			71252800	2932266	214395	99528
		chrysoeriol	40474	LC/MS Neg	100002959	3870	299.056	491-71-4	5280666	C04293	HMDB30667	196805	296817	140289		1515974	1323092
		cinnamoylglycine	38637	LC/MS Neg	100002253	3127	204.067	16534-24-0	709625		HMDB11621	662294	906355			77656	126742	1784929	1477463
		coniferin	43500	LC/MS Neg	100003866	2607	341.124	531-29-3	5280372	C00761	HMDB13682	254171	145845	296786	130062	1498694	177041	79963	103798
		coumaroylquinate (2)	54927	LC/MS Neg	100010907	2345	337.093					1374066	950375	264409	177877	1768391	100439
		coumaroylquinate (3)	54928	LC/MS Neg	100010908	2152	337.093					674222	333059	417457	284771	180881
		coumaroylquinate (4)	54929	LC/MS Neg	100010909	1982	337.093					4316737	2116219	841445	256526	1238489
		coumaroylquinate (5)	54930	LC/MS Neg	100010910	1934	337.093					989453	600471	1041654	434499	1106500	72748
		coumestrol	38134	LC/MS Neg	100002264	4375	267.03	479-13-0	5281707	C10205	HMDB02326
		cryptochlorogenic acid	41924	LC/MS Neg	100003802	2087	353.088	905-99-7	5315599			8031546	7351386	529481	645047	28311760	1310586
		cyanidin glucoside	34129	LC/MS Pos Early	100001352	2808	449.108	7084-24-4	441667	C08604	HMDB30684			394985696	261128528
		daidzein	32453	LC/MS Neg	100001219	3566	253.051	486-66-8	5281708	C10208	HMDB03312	128453	107759						42541
		dihydroferulic acid	40481	LC/MS Neg	100003432	1928	195.066	1135-23-5	14340			92842	252842	76485	157961		148873		37916
		dihydrokaempferol	37116	LC/MS Neg	100001819	2510	287.056	480-20-6;5150-32-3	122850	C00974	HMDB30847	8.18887e+06	138062	331063	231632		20551	1817301	819653
		dihydroquercetin	47896	LC/MS Neg	100002229	2198	303.051	480-18-2	471	C12316		3223074	49009	455745	205829			88302
		epicatechin	17774	LC/MS Neg	2070	2868	289.072	490-46-0	72276	C09727	HMDB01871			3691752	28979344			155626	151606
		equol sulfate	40478	LC/MS Neg	100003429	3630	321.044					172074	222338					888241	312022
		ergothioneine	37459	LC/MS Pos Early	100002154	850	230.096	58511-63-0	3032311	C05570	HMDB03045	7082761	2.78256e+06		985562	74008	743927
		eriocitrin	48365	LC/MS Neg	100006015	3375	595.167	13463-28-0			HMDB05811	831837		27863824	14473837	202305		52068
		eriodictyol	39611	LC/MS Neg	100002887	3120	287.056	552-58-9	11095	C05631	HMDB05810	7335074	1450967	724721	115816	311346	76796
		erythritol	20699	LC/MS Polar	100000846	1491	167.056	149-32-6	222285	C00503	HMDB02994	964853	1271986	877051	813193	590683	324695	345930	255276
		ferulate	35630	LC/MS Neg	100001542	1755	193.051	537-98-4	445858	C01494	HMDB00954	672703	1767208	1042535	1685465	1674456	2473885	532742	1564757
		ferulic acid 4-sulfate	47114	LC/MS Neg	100005389	1225	273.007	86321-29-1	6305574		HMDB29200	201876	213352	84033	629295		18945	688034	347483
		feruloylputrescine	48518	LC/MS Pos Early	100006048	2862	265.155	501-13-3	5281796	C10497		4269688	5.18897e+06	2296255				580716	625790
		galacturonate	20758	LC/MS Polar	100000873	3527.2	193.035	91510-62-2	84740	C08348	HMDB02545	7.58484e+06	21629736			235361	1954676	5595497	3551207
		genistein	32448	LC/MS Neg	100001221	3754	269.046	446-72-0	5280961	C06563	HMDB03217	174875	77879			362889
		glucoheptose	20705	LC/MS Polar	100000852	2573	209.067	62475-58-5	71306729			2688461	1107064	815917	767279	785429	103066	1082797	422032
		gluconate	587	LC/MS Polar	338	2922	195.051	527-07-1	10690	C00257	HMDB00625	239707232	405441856	28205004	32230218	352588480	210514912	49860496	54222876
		glucoraphanin	42571	LC/MS Neg	100003835	1320	436.041	21411-41-5	9548634			9539649	6882202
		hesperidin	21300	LC/MS Neg	100000838	3867	609.182	520-26-3	10621	C09755	HMDB03265	2044925		33743544	27413050	10325156	4.0322e+06	232638	31422
		homocitrate	39601	LC/MS Polar	100002554	4416	205.035	320573-06-6	439459	C01251	HMDB03518	1.64366e+06	1964616	3258311	3337540	394314		5590275	2443878
		homostachydrine*	33009	LC/MS Pos Early	100001550	1750	158.118	1195-94-4	441447	C08283	HMDB33433	10648836	10269239	1365927	1348991	24641732	30874920	28833652	7763223
		hydroquinone beta-D-glucopyranoside	38160	LC/MS Neg	100002220	1520	271.082	497-76-7	346	C06186	HMDB29943	295303	213647	704643	776102			253243	150486
		indoleacetylaspartate	39613	LC/MS Neg	100003110	1685	289.083	2456-73-7	446620		HMDB38666	345311	702144	1185950	4547057	170046	52314		33620
		jasmonic acid	35659	LC/MS Neg	100001643	3530	209.118	77026-92-7	5281166	C08491	HMDB32797	83223				3066920	734997
		kaempferol 3-O-glucoside/galactoside	48676	LC/MS Neg	100006353	3130	447.093					740431	756192	280777	458952			5668384	2946250
		methyl glucopyranoside (alpha + beta)	46144	LC/MS Pos Early	100005864	832	212.113					5473374	734987	189562880	42890288	1950525	8190830	46973644	31100662
		naringenin	44663	LC/MS Neg	100000920	3437	271.061	67604-48-2	932	C00509	HMDB02670	70617896	51915436	662552	389693	940137	1287609	76338	195691
		naringenin 7-O-glucoside	37471	LC/MS Neg	100002143	3760	433.114	529-55-5	92794	C09099		3003896	5225531	552261	335769	182208	68763	136902	214121
		nicotianamine	43026	LC/MS Pos Early	100004035	1800	304.15	34441-14-0	9882882	C05324		5873150	9617364	10478331	14821242	15616356	8847625	188779	9682411
		oleanolate	38286	LC/MS Neg	100002313	5563	455.353	508-02-1	10494	C17148	HMDB02364	11468260	11863528	1259283	366926	336949440	274038688	360834	88619
		pheophorbide A	35879	LC/MS Neg	100001689	5677	591.261	15664-29-6	5323510	C18021		1990741	2488383
		pinoresinol	42963	LC/MS Neg	100003495	4290	357.134	487-36-5	73399					236326	148784	118058	1278537	74068
		piperidine	38183	LC/MS Pos Early	100002398	2500	86.0964	110-89-4	8082	C01746	HMDB34301	12879723	17398904	1347492	2066427	3342199	3.0151e+06	39476248	29192964
		piperine	33935	LC/MS Pos Late	100001267	1168	286.144	94-62-2	638024	C03882	HMDB29377	727967680	746323776	781626	452268	1366495		205640	60527
		pyrraline	48428	LC/MS Neg	100001767	2304	253.119	74509-14-1				531561	906436			179724	581241	724252	589710
		quercetin 3-galactoside	34114	LC/MS Neg	100001355	2700	463.088	482-36-0	5281643	C10073	HMDB30775		242747	5987087	2573558	862573
		quercetin 3-glucoside	37131	LC/MS Neg	100001920	2800	463.088	21637-25-2	5280804	C05623	HMDB37362	1.77646e+06	1.53272e+06	2710932	1975520	1441886	236178	1163813	729217
		quercitrin	21186	LC/MS Neg	100000929	2990	447.093	522-12-3	5280459	C01750	HMDB33751	1558271	1728293	428317	349083	194268
		quinate	18335	LC/MS Polar	100000442	2432.9	191.056	77-95-2	6508	C00296	HMDB03072	635332992	488277600	731857344	552539264	1581990144	690596672	432559424	434438656
		rosmarinate	39785	LC/MS Neg	100002776	2785	359.077	537-15-5	5281792	C01850	HMDB03572	36518164	35638456	944736	227699	439093056	123084784		580974
		rutin	18382	LC/MS Neg	2071	2770	609.146	207671-50-9	5280805	C05625	HMDB03249	7955935	9721205	4045893	1709398			194870	143099
		S-allylcysteine	43239	LC/MS Pos Early	100004509	2690	162.058	21593-77-1	98280			7.81517e+06	5080407
		secoisolariciresinol	38105	LC/MS Neg	100002144	3945	361.166	29388-59-8	65373	C18167	HMDB13692			276558	140606	475773
		sinapate	21150	LC/MS Neg	100000869	1973	223.061	530-59-6	637775	C00482	HMDB32616	610010	581219	354120	639286	175122	285884	92101	255704
		solanidine	39788	LC/MS Pos Late	100002773	1010	398.342	80-78-4	65727	C06543	HMDB03236					3095031	3456571
		soyasaponin I	43590	LC/MS Neg	100004481	5163	941.512	51330-27-9	122097	C08983	HMDB34649		15526312		13913725	3751036	10603051		16531325
		soyasaponin II	43589	LC/MS Neg	100004482	5175	911.501	55319-36-3	171435	C12081	HMDB34650		242715		228917		147109		230525
		soyasaponin III	54925	LC/MS Neg	100010905	5176	795.454			C19865			2395402		2199492		1743373		2579844
		stachydrine	34384	LC/MS Pos Early	100001296	1440	144.102	4136-37-2	115244	C10172	HMDB04827	15733081	16467861	1337634304	1171114240	65687768	72373088	26937876	6102665
		sulforaphane	38697	LC/MS Pos Early	100002816	2535	178.035	4478-93-7	5350		HMDB05792	9337058	184344
		syringic acid	37091	LC/MS Neg	100001919	1450	197.046	530-57-4	10742	C10833	HMDB02085	155451	130048	510840	624177	173162	230048	190583	124244
		tartarate	15336	LC/MS Neg	100000295	615.3	149.009	87-69-4;6106-24-7	444305	C00898	HMDB00956	27270304	40038652	4875703	4311345	44388072	14126752	2304227	2842656
		traumatic acid	42964	LC/MS Neg	100004226	2833	227.129	6402-36-4	5283028	C16308	HMDB00933				98370				385675
		tribuloside	38175	LC/MS Neg	100002261	3933	593.13	20316-62-5	5320686	C17140				256290				415785	1095734
		turanose	21048	LC/MS Polar	100000938	3188	387.114	547-25-1	5460935	C19636	HMDB11740					46436384	52761612
		vanillate	35639	LC/MS Neg	100001634	1100	167.035	121-34-6	8468	C06672	HMDB00484	264350	340706	1032121	1163908	4774561	1945882	1678419	1005869
		vanillin	37442	LC/MS Neg	100002051	2311.9	151.04	121-33-5	1183	C00755	HMDB12308	340441	592627	266148	554520	980657	373686	92792776	5802450
*Indicates tentative metabolite identification and no purified chemical standard.
