# Supplementary material for: Plasma and Urine Metabolite Profiles Impacted by Increased Dietary Navy Bean Intake in Colorectal Cancer Survivors: A Randomized-Controlled Trial
Source: Oxford University Press journal article supplement (doi:10.1158/1940-6207.capr-20-0270), 2020-12-24
Supplement: 19406207capr200270-sup-244212_4_supp_6781602_ql74yj.xlsx [file 19406207capr200270-sup-244212_4_supp_6781602_ql74yj.xlsx]

## Sheet: Supplementary Table 3
Supplementary Table 3. Plasma metabolites classified into metabolic pathways for all participants.
CHEMICAL CLASS	METABOLIC PATHweeksAY	BIOCHEMICAL	COMP_ID	PLATFORM	CHEMICAL_ID	RI	MASS	CAS	PUBCHEM	KEGG	Group HMDB	Control Baseline	Control Baseline	Control Baseline	Control Baseline	Control Baseline	Control Baseline	Control Baseline	Control Baseline	Control Baseline	Control Baseline	Navy Beans Baseline	Navy Beans Baseline	Navy Beans Baseline	Navy Beans Baseline	Navy Beans Baseline	Navy Beans Baseline	Navy Beans Baseline	Navy Beans Baseline	Navy Beans Baseline	Navy Beans Baseline	Control 2weeks	Control 2weeks	Control 2weeks	Control 2weeks	Control 2weeks	Control 2weeks	Control 2weeks	Control 2weeks	Control 2weeks	Navy Beans 2weeks	Navy Beans 2weeks	Navy Beans 2weeks	Navy Beans 2weeks	Navy Beans 2weeks	Navy Beans 2weeks	Navy Beans 2weeks	Navy Beans 2weeks	Navy Beans 2weeks
Amino Acid	Alanine and Aspartate Metabolism	alanine	1126	LC/MS Pos Early	811	1700	90.055	56-41-7	5950	C00041	HMDB00161	630233920	501493824	498562688	542440320	583548800	747340096	681435392	790360256	540276800	525052512	665691840	509846304	531374336	589000960	539129280	635595456	601031936	501250368	455694304	673553728	471495392	534023776	526724160	578380928	679591616	633221568	620783488	440453344	572109696	655555648	445813472	587291648	525364352	622697792	640084992	582514816	667602112	492498688
		asparagine	512	LC/MS Pos Early	917	1225	133.061	70-47-3	6267	C00152	HMDB00168	418955360	335600640	279774624	312839744	331401120	311074048	306990336	401215872	336572032	135428880	525462336	353081984	343202592	410534528	400352064	341252000	171466368	82468456	367482752	383252544	381344704	310302304	305924224	336026880	317097152	385699552	51187704	72838456	175953344	345661056	359621408	340189376	409236352	418733664	334082848	66249088	369639456	307637536
		aspartate	443	LC/MS Pos Early	234	1165	134.045	56-84-8	5960	C00049	HMDB00191	25665370	27436152	17442536	16675606	49704360	17911672	19854058	23501812	31247800	2680208	20029156	12798933	20636800	14245671	15816827	27415720	13861392	2320837	20692380	29669940	22216162	12929929	70984312	28140740	23737160	25640756	2114858	5237859	18491084	17214948	11067755	16688222	14896302	24604044	30661798	9899843	15022493	23173380
		N-acetylalanine	1585	LC/MS Neg	1110	861.2	130.051	97-69-8	88064	C02847	HMDB00766	3804307	2412031	2992553	2050968	3604263	2614388	2495506	4034856	2771182	1888815	3.36779e+06	2753402	4416985	2.35653e+06	3290737	2430721	2676136	1606999	2467215	3056481	2554961	2743726	2215330	3128117	2560978	2296107	3058691	1877195	2183595	2393201	3344879	3702698	3013516	3178921	3051469	2902275	2052742	2.75891e+06
		N-acetylasparagine	33942	LC/MS Pos Early	100001257	785	175.071	4033-40-3	99715	-	HMDB06028	ND	ND	ND	ND	ND	ND	ND	ND	ND	567171	ND	ND	ND	ND	ND	ND	ND	429141	ND	ND	ND	ND	ND	ND	ND	ND	627174	1606345	ND	ND	ND	ND	ND	ND	ND	ND	ND	ND
		N-acetylaspartate (NAA)	22185	LC/MS Polar	100000787	3143	174.041	997-55-7;997-55-7	65065	C01042	HMDB00812	3956787	13880821	3323055	2579418	6211948	5947431	5723677	6907959	3857437	725676	4094522	11123454	3336363	3.55354e+06	3015677	8371035	1105265	476971	7459986	8358453	9265730	2612752	3.59004e+06	9445673	4906550	3025609	700108	709662	1017792	5882015	13086573	3351514	2928711	5351162	6096494	822755	4182296	9343628
	Creatine Metabolism	creatine	27718	LC/MS Pos Early	1221	1947	132.077	57-00-1	586	C00300	HMDB00064	1205213952	835095360	437323200	1540185600	835845760	1194570752	974088000	453759008	1218952448	1131003008	1090937728	931358272	887559488	1573908608	596351296	718165568	785853120	743940928	971779072	579436672	860483584	478346720	1805092096	585551232	1225487360	993855488	388155456	1204811136	1181862144	585063424	862123200	990358208	1456385280	675149184	725451456	760675648	674439680	1131676032
		creatinine	513	LC/MS Pos Early	275	2055	114.066	60-27-5	588	C00791	HMDB00562	839519296	817170688	888542080	805251776	941726016	730965056	857061952	978273152	792652032	848482560	763586496	832549824	975175360	773732096	861437696	913161728	827995712	710374720	815722816	948705024	797586048	881235904	760370496	934927296	708546560	872002496	911192704	737489664	863625344	824125376	819956032	931367360	787598912	887281728	893364288	801249216	825048320	822347328
		guanidinoacetate	43802	LC/MS Pos Early	344	1937	118.061	352-97-6	763	C00581	HMDB00128	31505390	44344144	66536288	50934312	62200832	42911392	43103112	43304344	42993568	58845888	54159596	72624256	53239840	35440840	37608996	45588864	53965696	29541608	46256656	83660480	64273712	78014112	28534110	32916776	79599024	65607828	28647008	58660492	38164128	35485820	69351816	28706040	52586292	41610000	45953484	28042632	47580928	64141948
	Glutamate Metabolism	beta-citrylglutamate	54923	LC/MS Pos Early	100003271	900	322.077	73590-26-8	-	-	-	1083536	1168368	1342886	1300044	1976409	1046382	882365	1179058	1224737	3666196	955412	837096	1283759	864466	774629	1496777	1318394	762815	1191472	1468285	825883	763904	2826316	927526	1392057	1071877	1389666	984846	2476401	695479	991970	844110	857341	1223348	1213433	1148547	711215	1526567
		glutamate	57	LC/MS Pos Early	561	1500	148.06	56-86-0	611	C00025	HMDB00148	359878016	355383456	390222816	377212352	830486656	393257344	375914592	506579808	255415056	124733480	301323488	199961184	354441120	273549536	311183040	474990848	601326400	222193344	588186112	395124928	289229056	334113792	755908544	695173760	401927072	355832864	380649888	189320016	260439568	279798784	188894912	189411280	315314464	432278208	506151520	689306944	303027584	749359040
		glutamine	53	LC/MS Pos Early	563	1291	147.076	56-85-9	5961	C00064	HMDB00641	2840864256	2482814464	2435617280	2185591552	2280574208	2220025600	2628035072	2367570688	2323697920	1852525952	2974169600	2575837696	2698777088	2366887936	2928904448	2552655872	2086375680	2036083200	1744431488	2482582272	2582406656	2462797824	2060243840	2329788416	2143779328	2615027712	1752235136	1887037056	1959799552	2375250432	2489592320	2656436224	2259325952	2844909056	2381320448	2005796608	3046229760	2053810048
		N-acetyl-aspartyl-glutamate (NAAG)	35665	LC/MS Pos Early	100001612	1035	305.098	3106-85-2	5255	C12270	HMDB01067	221192	209095	374571	260896	165877	209601	237733	164165	149216	271658	112285	115793	344749	266787	337233	176578	173909	238908	183435	ND	157134	254142	166781	ND	227589	255488	ND	296084	276133	104142	138046	148313	281398	262442	147071	ND	311347	170101
		N-acetylglutamate	15720	LC/MS Polar	100000282	3106	188.056	5817-08-03	70914	C00624	HMDB01138	1.79156e+06	1213331	2.08973e+06	936897	1350873	1456407	967104	1870003	1071675	153845	2.07469e+06	640427	1519735	1517725	1849486	1428251	223237	101190	1607582	1116524	992873	1450269	1087018	1516508	1.04757e+06	883122	150373	163888	169484	1371068	857185	1530833	1076158	1287487	1244524	192520	1395238	1783534
		N-acetylglutamine	33943	LC/MS Polar	100001253	2140	187.072	2490-97-3	182230	C02716	HMDB06029	156274	81521	128543	125183	142719	35249	73784	91935	145984	117474	143960	77121	100503	117462	269982	74579	47954	69724	100073	294630	112796	96399	188445	168196	ND	78019	59564	123710	120156	69557	94077	96709	96242	232716	65471	88613	160714	87534
		pyroglutamine*	46225	LC/MS Pos Early	100001540	1900	129.066	2353-44-8	134508	-	-	135956400	168184112	281530592	40830196	206565136	57651916	230910832	326159936	82706128	138379856	129363200	194775296	272678848	49391776	190564672	296964704	123579424	259256560	81184744	399900736	147476832	268707648	34218176	165152320	69236664	239314992	297572224	95406592	112971768	235713632	214251536	272339456	45421072	177805504	261179728	120621216	250539648	131082848
		S-1-pyrroline-5-carboxylate	42370	LC/MS Pos Early	35	1528	114.055	2906-39-0	1196	C04322	HMDB01301	3.72486e+06	2029041	1828519	1515455	1354793	2478585	2010763	2179998	2.04817e+06	1192581	2477295	2666824	3413466	3.37459e+06	2120626	1.7944e+06	2622556	2194297	2989907	4594345	3377344	2546129	2616847	1569825	2587930	2634169	719695	867431	3.34994e+06	1826199	1331897	2800659	3488696	2459001	2479691	2048830	4596242	1832284
	Glutathione Metabolism	5-oxoproline	1494	LC/MS Neg	1021	738.5	128.035	98-79-3	7405	C01879	HMDB00267	68057584	55685800	53027012	47379144	51163544	50010028	46753360	66206028	54936932	34025488	54217436	47016620	57928600	46242736	64900808	59086992	40797772	34179012	52293980	55813552	51611596	57224168	102117568	46894936	44007516	44726556	55954836	42717000	36086568	42288972	49002612	55669260	46271184	71786824	54211656	36226216	48860796	40963372
		cys-gly, oxidized	18368	LC/MS Neg	1224	925	353.06	7729-20-6	333293	-	-	1068727	1261378	1763159	1387211	3304346	1101516	1535808	1647683	936377	535397	626439	1245714	1042452	883872	995820	1622315	1433264	887652	510915	1151885	970479	1057036	4818651	1.89774e+06	1061190	1537525	908872	105312	1107155	858106	994552	840561	306367	1355007	1718491	905656	1.86926e+06	646455
		cysteine-glutathione disulfide	35159	LC/MS Pos Early	100001437	2465	427.095	13081-14-6	4247235	-	HMDB00656	2.6048e+06	3280416	8119717	2354200	5943866	1.65289e+06	3202314	3370110	5.38205e+06	7319158	2797968	6315456	3963774	1249010	3.14563e+06	2951647	644320	3.09049e+06	ND	8015232	2685190	5258725	52961676	3635237	966345	4375255	9362771	2706977	5681276	920742	4412024	2.6108e+06	ND	4233378	5589533	ND	4203740	389779
		cysteinylglycine	35637	LC/MS Pos Early	278	2132	179.048	19246-18-5	439498	C01419	HMDB00078	1400159	1664880	3929277	3462277	2997130	2283303	2629907	3587752	3194413	1924463	1888131	1225055	1.54726e+06	2475379	1919326	2710719	2626651	2.01382e+06	918882	2632224	1288214	2319159	7519437	ND	1807804	3115787	1.6641e+06	1055860	3376000	1276865	2134721	1274183	1978710	3560860	1836362	1710263	1717241	1794367
		glutathione, oxidized (GSSG)	27727	LC/MS Pos Early	448	2667	613.159	103239-24-3	65359	C00127	HMDB03337	ND	ND	ND	ND	ND	ND	ND	ND	ND	ND	ND	ND	ND	ND	ND	ND	ND	ND	ND	ND	ND	ND	13436981	ND	ND	ND	ND	ND	ND	ND	ND	ND	ND	ND	ND	ND	ND	ND
		glutathione, reduced (GSH)	2127	LC/MS Pos Early	496	2000	308.091	70-18-8	124886	C00051	HMDB00125	ND	ND	ND	ND	ND	ND	ND	ND	ND	ND	ND	ND	ND	ND	ND	ND	ND	ND	ND	ND	ND	ND	275894	ND	ND	ND	ND	ND	ND	ND	ND	ND	ND	ND	ND	ND	ND	ND
		ophthalmate	34592	LC/MS Pos Early	100001311	2085	290.135	495-27-2	7018721	-	HMDB05765	ND	ND	ND	ND	ND	ND	ND	ND	ND	ND	ND	57945	ND	ND	ND	ND	ND	ND	ND	ND	ND	96509	1363781	ND	ND	ND	ND	ND	ND	ND	ND	ND	ND	ND	ND	ND	ND	ND
	Glycine, Serine and Threonine Metabolism	betaine	3141	LC/MS Pos Early	799	1064	118.086	107-43-7	247	C00719	HMDB00043	1067938944	1077939712	1467704576	805959680	1158728832	1294156416	1382637184	1048859520	1037992064	1240238720	1129391488	1023381568	634473024	1128164224	1171518976	1078750848	985167488	955978880	1081459200	1261923072	1354296704	1259121408	825167424	1093866752	1166847616	1317134208	909146240	950310912	1174352768	1192425472	914173760	575882944	1078902656	1151664384	971265920	882781632	1616212480	1153995008
		dimethylglycine	5086	LC/MS Pos Early	806	1104	104.071	1118-68-9	673	C01026	HMDB00092	64744288	31561884	39003952	35162552	69253624	37463628	35981976	47227308	29666120	16307776	64449652	43317776	19171224	91241440	36087292	42852636	30347710	17377660	33804048	40641240	39356552	38027032	31890436	63984172	44272848	44158496	8432488	42373320	17339644	38821240	39830716	19012188	105227256	40015832	44423724	33278380	28421940	32306316
		glycine	58	LC/MS Pos Early	340	1375	76.0393	56-40-6	750	C00037	HMDB00123	183072272	148160096	176793872	109849168	116498008	150909088	185182864	147544432	225561008	191898416	175821376	189862912	210021520	159275104	146845088	138958384	155602592	125952904	129104592	148927440	150121984	185653264	118926728	107715776	138067536	171532112	112988008	184971648	193725792	134323808	184569136	199210416	148884320	149165632	123530704	136790304	174148560	143783808
		N-acetylglycine	27710	LC/MS Neg	100001006	731	116.035	543-24-8	10972	-	HMDB00532	1126002	2321867	3019620	1.87867e+06	1317123	1967531	1645651	2211863	3425093	2860996	1081016	6220762	3514362	2880137	2410045	2.03932e+06	1470253	1060529	1.97541e+06	2507292	1.71028e+06	3049921	1986649	1548014	1617442	2756380	1426265	3.69521e+06	3.14533e+06	1769082	9237718	3.75118e+06	2493715	1352806	2038451	1457931	1.92933e+06	2390064
		N-acetylserine	37076	LC/MS Polar	100001851	2000	146.046	97-14-3	65249	-	HMDB02931	10600376	6996831	9557229	6129719	15057120	7.18363e+06	6064331	10754073	7.12892e+06	5832349	15275390	7396242	11158268	8298364	9046307	8975873	7.26204e+06	3.77827e+06	7671197	9761425	8483995	7550626	7212802	12707256	6895848	9085073	6689506	5884834	6559262	7629015	9442846	9086484	9311554	9525560	8698517	6.79021e+06	6500354	7131385
		N-acetylthreonine	33939	LC/MS Neg	100001274	821.6	160.062	17093-74-2	152204	-	-	6804322	4650852	4230897	3.44528e+06	4637675	3126141	3635813	7.3593e+06	3401460	1110928	6790132	3907412	6685824	4502785	5153109	5001190	3.65914e+06	999073	4311836	5677573	4167618	4020804	3.29349e+06	4925374	2985565	3304859	2475410	1051324	2957362	4751517	3.83494e+06	5159699	3644315	7.10929e+06	5091102	3.1861e+06	3248868	4131829
		O-acetylhomoserine	31539	LC/MS Polar	100001129	1850	160.062	7540-67-2	439389	C01077	-	94495	56780	92287	ND	104984	2378239	ND	109927	63391	ND	100391	ND	121609	ND	210618	ND	36717	68411	84772	106693	102840	87386	70773	225392	82607	ND	ND	59221	ND	39752	49339	74283	70538	ND	ND	ND	239528	ND
		sarcosine	1516	LC/MS Pos Early	1023	1280	90.055	107-97-1	1088	C00213	HMDB00271	6401803	16255894	4854728	5870575	4897500	10737343	6205344	7.89679e+06	8971026	2516468	11835235	21125096	4328668	5427423	6157373	9809102	5133257	1600257	9489994	8.24342e+06	12847856	5573307	6266671	11197616	5708141	4298260	2625658	1187615	4622612	6.72486e+06	20710484	3726627	7.77913e+06	5120370	8981228	2674876	7221692	8.06474e+06
		serine	1648	LC/MS Pos Early	503	1239	106.05	56-45-1	5951	C00065	HMDB00187	201314816	190326336	165411808	151293696	177695520	189551424	198976592	140727568	192113568	192199008	222856256	226986976	186196912	231335104	182831616	169650784	146470288	139164288	167560592	190703120	210018688	173342416	148630736	125159552	191841568	208732832	102911848	163816640	204126672	170266560	230844624	161730800	223386448	180225232	161439280	125326608	190843840	209240320
		threonine	1284	LC/MS Pos Early	564	1514	120.066	72-19-5	6288	C00188	HMDB00167	638548608	363266368	312563872	372684896	354063584	334965888	383913504	460019072	371413440	356380288	735254784	326936032	694482368	539432640	492839072	322567136	316350464	329324096	263726352	395650112	404676960	348004800	344792256	318379552	353416672	377744896	319257216	314465536	389732992	378691424	358561728	628268672	545297920	449474464	336328736	270481664	458499168	315447296
	Guanidino and Acetamido Metabolism	4-guanidinobutanoate	15681	LC/MS Pos Early	100000096	2320	146.092	463-003;463-00-3	500	C01035	HMDB03464	994958	619918	848698	1002224	908241	446988	1451058	1297609	1020323	758887	1085370	509911	1823138	564679	1042913	635702	317614	1058200	1531986	1793717	1.01161e+06	908172	1037063	823190	579479	1100805	1.33426e+06	780224	667252	1623946	410097	605867	595977	1049923	572895	467171	2358382	700971
		guanidinosuccinate	32446	LC/MS Polar	100001212	3550	174.052	6133-30-8	97856	C03139	HMDB03157	128199	127760	204251	106751	116723	80841	70919	183823	185097	122235	169652	202627	87553	92986	76906	145287	73222	26301	223272	152040	96070	222736	80379	111788	114973	100123	104922	139420	135686	100713	284745	125197	117861	72490	133680	67493	42679	171021
	Histidine Metabolism	1-methylhistamine	43831	LC/MS Pos Early	100001204	3040	126.103	501-75-7	3614	C05127	HMDB00898	ND	150232	100142	ND	731001	ND	159450	116669	214293	ND	88618	196225	355472	ND	225641	299556	ND	ND	128501	405412	ND	ND	448696	243425	71172	209235	ND	ND	ND	166227	103302	246999	92254	592811	340885	ND	ND	106509
		1-methylhistidine	30460	LC/MS Neg	100001051	1227	168.078	332-80-9	92105	C01152	HMDB00001	706886	427413	797816	939895	777742	325556	380564	972246	593627	252983	499931	569466	1082705	389378	545187	448022	675169	194731	551295	647576	519422	899587	524500	533262	378794	361611	522558	327669	321927	604035	537041	868849	618656	554959	575485	649453	328876	563616
		1-methylimidazoleacetate	32350	LC/MS Pos Early	100001208	2064	141.066	2625-49-2	75810	C05828	HMDB02820	3342771	3.0331e+06	4061909	3025444	5.48002e+06	2795607	2891866	3737711	3834050	2307755	3653610	3964986	6733361	3339163	3989865	2761072	3.71218e+06	1709130	3075958	4702697	3315700	3340161	3152830	4493621	2681294	2984609	3331741	2847490	2196479	4584613	4289102	6823044	2786679	3650930	2895981	3602136	2329671	2.62183e+06
		3-methylhistidine	15677	LC/MS Neg	100000042	906.3	168.078	368-16-1	64969	C01152	HMDB00479	33793724	4635161	31062006	25506732	18966872	1335165	12478104	12230397	12640132	305402	25162096	25458588	14378788	26885280	4801686	2250075	1239665	5871266	6524966	3562489	14663972	14801014	7.30851e+06	3.44771e+06	1943167	11181226	850615	5907922	496228	20691384	7372519	11246819	25479890	1251753	17168892	1342932	9500822	4.01203e+06
		4-imidazoleacetate	32349	LC/MS Pos Early	100001207	2055	127.05	645-65-8	96215	C02835	HMDB02024	657338	476962	1323297	543093	350851	197113	487303	117806	316095	129200	1082328	402788	284197	169142	804600	623596	258027	ND	363666	500627	599379	1114741	540504	317963	313788	262377	ND	341674	392015	682890	463843	503373	277981	471910	590493	256860	333141	ND
		histidine	59	LC/MS Neg	355	755.9	154.062	5934-29-2	6274	C00135	HMDB00177	67246856	81252520	54968448	72792288	69697968	58523936	72567936	67897112	63970352	42509356	75366008	75943936	72555128	67809152	76596520	85931408	53793904	45235188	56268760	68611904	80069144	67181520	73678008	74057760	64176172	73408696	43519044	41977060	62875604	62844432	72292640	71704304	74930768	76722928	87553416	49673564	77744032	55584484
		hydantoin-5-propionic acid	40473	LC/MS Polar	100002514	2080	171.041	5624-26-0	782	C05565	HMDB01212	244496	87281	ND	164157	320631	77354	96209	163668	58805	70337	378659	110807	109537	60228	282649	210330	77807	ND	217976	144251	110907	44212	200720	214389	77466	115970	169779	28522	73421	69588	126346	81596	83515	267560	324172	115818	ND	114183
		imidazole lactate	15716	LC/MS Pos Early	100000263	2040	157.061	14403-45-3	440129	C05568	HMDB02320	11394122	11164107	15451300	12619465	15604252	10129850	12732640	9036181	9364280	11717502	15411366	10844183	29173378	10064658	27344112	22158848	14512554	12978783	10098579	15328098	11079784	17032748	12144520	10679288	8977733	16234678	9680170	9684805	11505692	17658144	10232426	23559496	9777404	33628920	24280560	12693061	14898705	12629950
		imidazole propionate	40730	LC/MS Pos Early	100003434	2263	141.066	1074-59-5	70630	-	HMDB02271	673462	444008	877748	381386	1191930	2344225	609685	488638	205595	491428	1.01683e+06	246152	242927	296611	625676	1365001	499764	2172147	894871	525803	450986	951833	391298	660485	1.42527e+06	465481	388702	188141	1034936	331110	311099	155719	1233005	1096786	1.51514e+06	743725	2649386	1026941
		N-acetyl-1-methylhistidine*	43255	LC/MS Pos Early	100004299	2100	212.103	-	-	-	-	899409	786581	1093533	3292648	2716225	ND	448933	1774602	2.0323e+06	629169	734961	791296	764491	651351	1320721	690095	1212897	545701	1202538	2660357	516961	1328431	2122347	1912335	198176	343203	1366808	1637004	575377	1140249	660268	759761	835957	1549396	1115079	1470355	492699	781178
		N-acetyl-3-methylhistidine*	43256	LC/MS Neg	100002204	1360	210.088	37841-04-6	193270	-	-	171053	36060	182490	232349	199181	ND	46889	93019	116858	ND	108784	100097	54717	106121	28530	ND	ND	15125	35865	45870	96628	89206	82023	25694	ND	36592	ND	33586	ND	112319	39728	ND	83365	ND	83034	ND	55655	21507
		N-acetylhistamine	48679	LC/MS Pos Early	100006123	2287	154.097	673-49-4	69602	C05135	HMDB13253	ND	ND	ND	ND	ND	ND	ND	ND	ND	ND	ND	ND	1.65885e+06	ND	ND	ND	ND	ND	ND	ND	ND	ND	ND	ND	ND	ND	ND	ND	ND	ND	ND	1873010	ND	ND	ND	ND	ND	ND
		N-acetylhistidine	33946	LC/MS Pos Early	100001293	2065	198.087	39145-52-3	75619	C02997	HMDB32055	1242236	1.04821e+06	966540	865515	1067650	567541	533697	880474	1106281	687238	1618864	923630	867683	813149	1.01433e+06	907328	845460	662611	697649	1141008	1113302	974969	1133458	997756	516241	725689	807002	1122577	620943	763397	825606	756662	947553	840782	721610	826293	859348	578334
		trans-urocanate	607	LC/MS Pos Early	537	2285	139.05	104-98-3	736715	C00785	HMDB00301	3836361	6370608	6.00244e+06	1514744	5.5102e+06	4314315	4254005	6785545	5731049	5319886	5300947	2973393	6.32094e+06	1.42558e+06	5978958	6208268	6040815	2906833	2227313	3117712	4791364	7178333	2417150	3637128	5108820	2275037	5259205	8736544	4321126	2879764	4748610	3553901	1676733	9185492	6.16449e+06	6790462	2156352	2801074
	Leucine, Isoleucine and Valine Metabolism	2,3-dihydroxy-2-methylbutyrate	57547	LC/MS Neg	100010869	787	133.051	14868-24-7	301941	-	HMDB29576	423046	206550	399208	312102	371087	378388	280884	1328908	216990	169678	339599	257092	637989	250468	559577	391115	192412	214830	346227	262779	348348	305955	278189	440255	483632	212711	546297	331923	314083	608480	612012	536969	700787	782088	548098	433305	311739	274562
		2-hydroxy-3-methylvalerate	36746	LC/MS Neg	100001541	1800	131.071	488-15-3	164623	-	HMDB00317	648772	361474	769123	520499	863874	910713	657736	1000563	281002	493528	736206	545834	749706	528180	450368	1208965	731302	557091	479935	480335	274174	938221	440881	857708	630108	678282	974868	321268	604687	859706	615593	907837	689247	414667	1218422	926701	673810	395323
		2-methylbutyrylcarnitine (C5)	45095	LC/MS Pos Early	100001509	3035	246.17	31023-25-3	6426901	-	HMDB00378	2689295	1290587	2501617	2067806	3797594	2.53866e+06	1931016	3.99038e+06	1970985	789914	3594790	1889483	2716977	1.92326e+06	2635621	2616541	2191083	1.08281e+06	3014412	2432542	1412073	2908237	2598699	2632929	2399416	3062600	1.55721e+06	1106748	1243028	2439916	2298900	2512683	2399601	2295040	2714051	1.8905e+06	1611445	1878639
		3-hydroxy-2-ethylpropionate	32397	LC/MS Neg	100001170	975	117.056	4374-62-3	188979	-	HMDB00396	1124022	501490	2.06743e+06	823670	1561069	943184	651594	1215360	1218557	640773	869330	1571808	1423408	582516	1104600	806032	847280	502258	641237	1112415	602707	913606	784511	1188948	916124	742189	1328127	728651	549864	828839	1.93463e+06	1130263	1110601	597714	1389327	969038	411652	857726
		3-hydroxyisobutyrate	1549	LC/MS Polar	111	1619	103.04	2068-83-9	87	C06001	HMDB00336	3.45432e+06	3114845	9771707	7062666	12529474	11211859	7646332	9791604	4699960	2686758	6440590	6450708	5564341	6392801	7849631	7397586	6457111	6003952	5760201	4641614	4067619	7744283	10204360	6434455	11584116	9320978	9464974	5847896	3054160	7288767	12093827	3672980	11733621	4749028	6913170	6803332	2342926	7147005
		3-methyl-2-oxobutyrate	44526	LC/MS Neg	100000936	1465	115.04	3715-29-5	49	C00141	HMDB00019	14861891	10165794	17181088	17436130	17710876	20192816	13801421	10901931	10963659	9144022	14411280	18867764	17686212	18178236	14657961	13732382	14162858	12203888	10564904	9457828	9870213	12172269	16433895	15329378	20067220	14022258	11230489	9810320	10471103	13709318	19577024	14067187	21588946	14833357	18906876	16262250	10502572	12959828
		3-methyl-2-oxovalerate	15676	LC/MS Neg	100000036	2064.2	129.056	1460-34-0;51829-07-3	47	C00671	HMDB03736	43048216	29301768	54533224	49247268	62698240	67581520	46803064	49241252	39564416	29010580	42861940	59946300	60993004	57249072	46324128	65202368	47720252	42943024	25407486	36880424	28682248	40524756	45832692	55057952	56059384	56085980	35953288	23468006	36272820	58856420	62444448	53112348	70963816	43979984	68817312	43921680	43259436	31503612
		4-methyl-2-oxopentanoate	22116	LC/MS Neg	100000551	2170	129.056	816-66-0	70	C00233	HMDB00695	71358352	50807896	77005872	89312688	101159168	109924144	80712360	79727856	58897036	51980000	77847936	107218000	94170640	91394576	75774624	104259840	69449256	74449976	40431760	57995048	52353100	59414228	87737736	87414664	99045728	99416536	66726468	44886136	59932764	99314992	107729040	73601968	110751816	80494712	119093216	63125428	73215240	44304564
		alpha-hydroxyisocaproate	22132	LC/MS Neg	100000706	1840	131.071	10303-64-7	83697	C03264	HMDB00746	467397	458025	1129721	642571	756506	1074656	656526	881619	318577	701271	483224	837213	790243	530536	645042	1132657	471519	593897	413750	323501	300134	590046	733960	678006	670621	661173	1079743	399045	685937	788576	964490	655738	842757	546505	1161570	573106	593775	491604
		alpha-hydroxyisovalerate	33937	LC/MS Neg	100001300	1126	117.056	600-37-3	99823	-	HMDB00407	9717647	2880702	12954821	5836879	7903218	9183783	6883681	9227394	3527127	5640199	8845437	6.92207e+06	8190221	6491391	5416248	10075733	7.62266e+06	4235331	5789119	3583688	2968305	8465044	5579392	7.97772e+06	9686107	5171701	10067321	2699935	6.36061e+06	5117754	7.27925e+06	7980884	7.31188e+06	4546194	13083712	10823098	5826256	5378269
		beta-hydroxyisovalerate	12129	LC/MS Neg	1442	1027	117.056	625-08-1	69362	-	HMDB00754	1654097	663338	1287346	1476666	1631458	1384001	1275725	1840940	1242875	1377727	1745853	1.73918e+06	2.05771e+06	1080318	1615490	922587	1233567	1569957	1420392	917235	920321	675916	1375965	1175252	1972795	1081525	2906816	1572881	1189204	1079848	1699548	1349132	2280384	894297	1729116	1561749	615618	1310358
		ethylmalonate	15765	LC/MS Polar	2054	2785	131.035	601-75-2	11756	-	HMDB00622	5491709	2821638	10237562	4407737	5629711	4518828	3531598	5363393	4226545	5716831	5173103	16854540	5383641	2928333	4361498	4637399	3.53244e+06	950993	3635535	3.45085e+06	3331701	6013805	4393437	4657280	3.08201e+06	4093854	3525543	3.38583e+06	4920571	3140387	28366414	4754773	3.15295e+06	3.81189e+06	4929991	3.53844e+06	2123063	6488816
		isobutyrylcarnitine (C4)	33441	LC/MS Pos Early	100001055	2810	232.154	25518-49-4	168379	-	HMDB00736	24981856	5723706	27729058	7.47648e+06	11031690	11975877	7835942	12646294	17188168	5552447	53853740	9479652	18908028	12656597	9123854	3359037	10657631	8776245	23963826	18517032	9096872	36395840	11265275	6452388	16162710	12464930	15073121	15601164	10935841	7476965	11621350	19583944	26521628	9279195	5277515	13239601	6062128	8502828
		isobutyrylglycine	35437	LC/MS Neg	100001590	1420	144.067	15926-18-8	10855600	-	HMDB00730	ND	102696	182482	129221	128762	110935	139513	155623	389572	106397	171401	107482	564710	131660	123372	ND	114321	86796	247038	156788	ND	233445	131728	100931	149489	ND	162923	246257	272964	78790	93851	496618	231135	ND	131257	114922	ND	151100
		isoleucine	1125	LC/MS Pos Early	376	2800	132.102	73-32-5	6306	C00407	HMDB00172	850498816	697013312	939890688	820811456	1123773696	872382144	924804224	955103552	697100416	718672768	823671232	781754176	883697088	928883072	858539840	1047636032	789832448	742859776	821508160	798289472	659053760	847129280	806145984	1021222592	918829888	951478912	806080128	525959840	802227200	941190400	800829184	908048896	992571904	877535680	1080041216	777640384	923810624	802216256
		isovalerate	44656	LC/MS Neg	100000708	1564	101.061	503-74-2	10430	C08262	HMDB00718	ND	ND	822277	ND	1.02341e+06	862358	475677	ND	ND	1727647	812032	ND	765335	397553	463200	ND	ND	1.91539e+06	ND	ND	351435	ND	ND	ND	713222	ND	2327261	1578998	ND	ND	676593	ND	815390	ND	1022743	1621767	ND	ND
		isovalerylcarnitine (C5)	34407	LC/MS Pos Early	100001393	3085	246.17	31023-24-2	6426851	-	HMDB00688	4812547	3.61604e+06	6178740	5076249	13015742	6.62388e+06	9504169	11533716	4503281	3340994	11106734	4866405	5220855	4512526	4829867	7547713	9204584	5408621	9478804	5080513	2425465	8270290	7937418	8034398	7295917	10394294	9243844	5492377	3934704	4854678	4516849	3675502	6119701	6862150	9962724	10038695	4952049	6446306
		isovalerylglycine	35107	LC/MS Neg	100001452	1950	158.082	16284-60-9	546304	-	HMDB00678	166294	265223	148336	110812	199624	157607	258404	303493	447333	233387	174184	221457	470321	158394	180268	84496	140869	266594	688882	257411	221630	279742	162919	169525	175590	344232	69636	504195	459939	ND	133625	769103	306865	153977	ND	233001	361912	216772
		leucine	60	LC/MS Pos Early	397	2864	132.102	61-90-5	6106	C00123	HMDB00687	916323968	761519104	864322112	944274176	1146463872	915786048	1034973184	1045542784	737799680	708867648	866172672	812294144	883168064	954880512	893910976	1115635840	739742592	791559808	850343936	823048320	713705472	808466880	997114176	1063947520	1025726848	999429056	955794944	521511232	827383296	1000126784	814216704	782442816	1043652736	988869056	1201405824	727538816	897330496	788866752
		methylsuccinate	15745	LC/MS Polar	2051	2800	131.035	498-21-5	10349	-	HMDB01844	735290	511692	770120	249634	570443	566032	570662	799433	464473	308481	890536	678066	647486	368701	646729	166630	326221	305727	822028	436657	780132	488976	315365	697646	618371	585967	424974	303455	296661	437540	1215449	472317	441580	348277	51889	355244	321644	516815
		methylsuccinoylcarnitine (1)	53031	LC/MS Pos Early	100009275	2589	276.144	-	-	-	-	554202	326483	231319	340827	780338	262994	657631	652045	758357	ND	522530	677371	358847	226576	1097368	263746	393697	331703	297013	426145	456074	329659	385632	826213	245573	660235	726835	609769	439304	583693	816038	494660	186239	1132774	199486	327122	412922	169048
		N-acetylisoleucine	33967	LC/MS Neg	100001276	2325	172.098	3077-46-1	2802421	-	-	195356	102442	138878	97852	211399	86257	131528	183274	102347	81146	160817	125860	153046	173820	162076	165134	148329	94001	155767	153918	104954	107344	122476	171366	85851	141418	145174	81845	82879	160461	130953	145317	167593	146546	137217	155852	119270	108423
		N-acetylleucine	1587	LC/MS Neg	1082	2400	172.098	1188-21-2	70912	C02710	HMDB11756	189617	112879	176547	175967	303093	118725	152348	218833	139631	111816	191887	93508	179503	165834	208736	179017	155350	92358	159236	279218	107069	171536	220789	243886	107891	155696	174720	115039	179413	148520	117694	140341	161779	232312	175303	169608	154540	106763
		N-acetylvaline	1591	LC/MS Neg	1084	1704	158.082	96-81-1	66789	-	HMDB11757	451426	301055	411432	343664	526813	265923	331937	535158	387491	211308	499879	360418	531469	364548	315670	299431	360482	172520	375004	424080	322445	374771	323624	376865	274894	320642	ND	300661	368783	395802	368048	392545	449144	406353	386585	277267	314767	302672
		tiglylcarnitine (C5:1-DC)	35428	LC/MS Pos Early	100001597	2962	244.154	64191-86-2	22833596	-	HMDB02366	1366165	812436	1774281	1400330	1528200	1.71084e+06	1643487	2944480	1266890	1349368	3280697	786783	577310	688672	2144065	1394916	1.88493e+06	1381545	1399234	1702013	850938	1200281	1485244	1369617	2327970	1689672	2833614	1226561	780329	1498498	1380179	536367	1550300	1.56393e+06	1793831	1703428	1133110	1082190
		valine	1649	LC/MS Pos Early	566	2479	118.086	72-18-4	6287	C00183	HMDB00883	1096279424	822711232	964825088	1095913856	1280918144	1057746880	1116485632	1003992576	818425152	801833600	986025536	820324800	959421184	1115377152	1051839488	1064987328	869490176	569130176	1019333312	832615744	758131008	867784576	1101141888	1077086208	1226206592	1127624704	990486592	689165504	996666048	1009548864	772718784	851185664	1292862592	1037239808	1284288512	945820160	906823488	864764672
	Lysine Metabolism	2-aminoadipate	6146	LC/MS Polar	381	3500	160.062	542-32-5;1118-90-7	469	C00956	HMDB00510	278744	165825	509643	378228	830177	505734	352967	713083	280760	126370	515652	301080	210518	189882	342140	463103	207119	136330	282459	388333	269641	307693	338890	646137	470387	469604	345542	187179	142935	551210	477628	182207	383318	332566	607351	206380	191114	413040
		3-methylglutarylcarnitine (2)	46548	LC/MS Pos Early	100005850	2675	290.16	-	128145	-	HMDB00552	3.57376e+06	1496697	2494257	1162484	2470157	786627	6238147	3443947	1652677	1445923	3041976	4.01039e+06	7.44527e+06	1223307	2209938	1049882	2710902	1048756	740723	2666365	1375058	2934133	944827	1693517	787520	6357687	4.17115e+06	346129	1378751	1.84497e+06	3539834	5207232	1.03743e+06	2367962	980071	2074172	355016	854739
		5-(galactosylhydroxy)-L-lysine	43582	LC/MS Pos Early	100002462	2755	325.161	32448-36-5	-	-	-	777928	607050	706679	575273	830169	449943	483822	878873	406567	273839	701688	409413	977311	259632	501216	665444	611990	133307	564684	752813	537109	700021	335119	659644	394756	423423	476319	267549	264681	691126	685352	767742	456746	503528	504384	482657	305067	439269
		5-hydroxylysine	15685	LC/MS Pos Early	100000054	2790	163.108	13204-98-3	1029	C16741	HMDB00450	2409519	944650	454168	671357	1591132	646438	452526	1.01685e+06	1058128	1091184	1406504	672320	1283708	558367	779211	605380	864045	344837	942239	977932	1067463	414889	541203	1023451	598030	618645	792441	972451	1945231	759370	655206	843393	502300	773987	586014	781229	410881	1010635
		6-oxopiperidine-2-carboxylate	43231	LC/MS Neg	100004499	964.5	142.051	34622-39-4	3014237	-	-	265413	242766	174467	451689	518574	279861	314596	328537	433687	94333	572409	328721	610977	209435	360515	424291	366342	63563	390785	291006	245317	232798	330708	341286	401332	368129	140643	187641	224808	257823	576216	435077	560057	414629	638983	198431	ND	350032
		glutarate (pentanedioate)	396	LC/MS Polar	339	2900	131.035	110-94-1	743	C00489	HMDB00661	423066	305710	749344	462495	581832	3271125	233390	422779	542172	1839546	732045	522487	586465	400699	417523	1157208	557340	1450196	4791642	495111	395709	431512	437691	255851	4160322	568966	913524	799316	2085673	321426	556633	356813	479185	585426	2822220	1219101	633439	3228269
		glutarylcarnitine (C5-DC)	44664	LC/MS Pos Early	100001593	2393	276.144	102636-82-8	71464488	-	HMDB13130	2526487	2588423	3192543	3317108	3761786	2520683	3235016	5193733	4582691	2646105	3378604	2204760	3214184	1843248	4120019	3833430	2722942	1673172	3085110	3961733	2854862	2891689	2943123	3700555	2782744	3902340	3220335	3250567	2979781	4145748	2874143	2475615	1991372	4430113	4232798	2462504	2516073	2989276
		lysine	1301	LC/MS Pos Early	407	2850	147.113	56-87-1	5962	C00047	HMDB00182	693140672	622990208	421670400	618345984	548442112	568255552	590748224	703818816	595529600	504185888	776305152	554591808	650778432	640788992	586020032	662596672	542722432	502146304	545146112	603485120	603781760	496633472	594588096	537033984	548302144	642554624	622554688	498101856	504048128	672748736	527484064	578303040	621616576	639654144	679431360	511509312	395526336	528012992
		N2-acetyllysine	36751	LC/MS Polar	100001721	3372.6	187.109	1946-82-3	92907	C12989	HMDB00446	31199	46641	14315	94149	46809	ND	ND	60123	92618	20450	41856	ND	64972	30709	94364	21320	ND	ND	31158	110256	22340	ND	92442	81427	ND	28175	ND	61706	30341	ND	ND	27835	50552	75374	ND	ND	ND	34888
		N6,N6,N6-trimethyllysine	1498	LC/MS Pos Early	189	2825	189.16	23284-33-5	440120	C03793	HMDB01325	41239240	23716156	32638598	32039630	48408668	23108964	23769118	47383672	21226912	16770498	39462864	19938646	29229090	31975650	22922866	31607484	27244948	21025796	30057348	26595936	24504908	37716860	46704544	33976612	22182058	27281420	27966408	19008064	18423300	43224288	20143460	33538988	69116440	23080896	35231496	23016196	22952572	23420908
		N6-acetyllysine	36752	LC/MS Neg	100001734	1059	187.109	692-04-6	92832	C02727	HMDB00206	828908	701459	521082	580746	872700	606515	722147	1277433	691378	260295	742269	655057	1115773	783427	648276	633927	599304	172515	816296	669484	780561	549648	640587	892752	527196	682134	447298	333411	549446	715771	714520	927247	697001	787943	654025	517020	451205	552092
		N-acetyl-cadaverine	43530	LC/MS Pos Early	100002249	2385	145.134	32343-73-0	-	-	-	166868	71333	ND	ND	ND	70298	101997	ND	ND	129823	413051	ND	2599432	51729	93925	73761	ND	223403	287612	ND	72599	70759	ND	ND	404295	121234	ND	ND	405787	56628	167452	3671324	87288	207914	217108	ND	745930	142427
		pipecolate	1444	LC/MS Pos Early	1025	2200	130.086	4043-87-2	849	C00408	HMDB00070	43336052	50972648	103075504	55340116	34667988	30874212	48824896	64787900	52883556	35812056	58803044	34041128	284237184	90718432	345208736	159693808	55229940	43824460	51872504	44753768	139868416	60060312	51435632	49587664	32022058	49107688	63525376	57516736	41466012	138795456	253697872	239663392	295539104	427572992	166516656	173487456	87888456	93715016
	Methionine, Cysteine, SAM and Taurine Metabolism	2-aminobutyrate	42374	LC/MS Pos Early	1128	2059	104.071	1492-24-6	439691	C02261	HMDB00650	68582904	44763340	82265144	101343432	114924624	77754224	81356712	88840752	66169676	78405904	117005800	60440712	42999144	70929696	76255256	60021692	70243832	52888524	52158704	87205184	42911868	65393216	77753520	61049444	86908392	99572256	75686816	55711820	75317600	83699296	66549560	34378992	70141408	88897880	85166280	58053024	51527672	83280904
		2-hydroxybutyrate/2-hydroxyisobutyrate	52281	LC/MS Polar	100008928	1258	103.04	-	-	-	-	6590642	7972110	34032136	22563092	35446680	33384804	11475704	13887319	8727154	12001016	14291639	17192526	7509762	12482334	11781822	16669814	24031540	13349141	14440668	8123197	7827214	16463059	25308890	16644616	38798136	15087680	21325192	11187187	7714163	19562054	30104684	5710650	16507697	10411775	25906608	28655444	4944975	18669364
		alpha-ketobutyrate	4968	LC/MS Polar	796	940	101.024	600-18-0	58	C00109	HMDB00005	542674	723641	2669146	2071930	2577781	2077082	979677	1066686	839491	ND	1059837	520878	765605	1355772	1345138	1633601	1755665	ND	1247262	889982	709398	1187227	2019938	1180316	2812904	1061409	245635	266687	279098	1326423	2044691	491871	1520080	1477341	2365448	1998138	218878	644551
		cystathionine	15705	LC/MS Pos Early	310	2270	223.075	535-34-2	439258	C02291	HMDB00099	1915741	929781	669171	353521	1499244	888508	389944	2975132	495469	734118	6002539	409482	538689	463653	909781	475718	1932734	303686	731032	944982	922383	935184	325968	902506	800467	528437	1567415	623046	903343	1043413	976725	650026	613698	766242	676753	2143785	287769	554199
		cysteine	1868	LC/MS Pos Early	800	1488	122.027	52-90-4;56-89-3	5862	C00097	HMDB00574	13529976	10081207	14639318	14831710	9682735	10558195	12214767	14655262	18291072	11138409	10463702	8384019	8710994	14860940	13146057	12502241	8786706	7867334	9033664	13533234	9597309	11944192	15381718	3.9917e+06	9177224	11137157	7344287	14152743	16193095	11034327	12695278	10607126	15211888	13674723	11037819	6025555	8259098	10881062
		cysteine s-sulfate	22176	LC/MS Pos Early	100000808	565	201.984	1637-71-4	115015	C05824	HMDB00731	1.64418e+06	1585613	1235364	1290708	978228	1827011	3215735	2542781	1452055	1.60127e+06	1544836	1.02442e+06	1944417	1382359	1295106	1.02223e+06	2528453	1493733	938283	1216780	1209927	1368630	826021	1.53091e+06	1178521	2208563	945342	517903	1.60492e+06	1940058	1194951	1.60829e+06	365072	2170052	1.02574e+06	1.90841e+06	1.00803e+06	1584593
		cysteine sulfinic acid	37443	LC/MS Pos Early	100002113	597	154.017	207121-48-0	109	C00606	HMDB00996	93088	169187	156764	112131	ND	87698	124266	146176	266139	ND	131560	88739	237841	102987	179147	62635	134662	156522	134870	85566	154927	166241	246074	ND	ND	179008	68843	290326	120482	82330	111426	218825	108333	190199	ND	313252	94978	154667
		cystine	56	LC/MS Polar	279	3424	239.017	56-89-3	67678	C00491	HMDB00192	8647666	10485948	27978056	7498550	17512620	13652972	10144334	7633187	6169004	4650193	17037580	10764200	13274490	4.04527e+06	4847570	13251398	7781946	2569270	15455254	9431233	11233932	14287841	2711082	13471155	13762147	16146425	5073087	1735075	4.15859e+06	9596342	10217383	9142847	2068850	8077140	18283036	6317470	14174845	17321436
		hypotaurine	590	LC/MS Pos Early	358	724	110.027	300-84-5	107812	C00519	HMDB00965	5320135	3310527	2721374	1940783	13982343	1760941	2071889	1760330	3466211	1564340	6773132	2501314	1886465	2961102	1454141	4000920	1672944	1225810	1791389	4414706	2154671	1.32503e+06	7328510	5672661	2824832	2.58529e+06	1474870	2082122	3501154	1773340	2318972	895750	2233350	2780316	2918033	1037654	1898255	1.63416e+06
		methionine	1302	LC/MS Pos Early	415	2526	150.058	63-68-3	6137	C00073	HMDB00696	343706912	223019360	241537632	243249856	320074528	302840000	299319616	358838176	235454640	256075584	478323424	278013728	249150848	329886528	284863456	300843072	257909488	238928176	195495488	295973984	234832256	281294112	263163888	329518720	262456736	337133664	302305376	205870800	273480896	308714816	247733440	247446336	335384320	319510336	317672800	237767104	304732768	227404256
		methionine sulfone	44878	LC/MS Pos Early	100004635	1250	182.048	820-10-0	69961	-	-	5169695	5382278	6270787	2631389	5174426	7095633	4226778	5390735	6943223	3390219	5241657	6490955	7531756	3665802	9330917	4842361	7.10583e+06	2791128	5268073	3952784	5256461	6459412	2457132	3.93247e+06	5848578	4499067	3.20725e+06	6633474	2590460	3981167	6156000	8512288	4490098	9233628	4436874	5836188	4602235	6522332
		methionine sulfoxide	18374	LC/MS Pos Early	100000039	1272	166.053	3226-65-1	158980	C02989	HMDB02005	14843803	8.27471e+06	11041005	8480058	17142972	11171952	10979086	13418206	7981273	8698428	19037310	8090757	11416407	13135511	11460179	9299596	13546910	6625377	13463685	8602328	8740211	13892464	9471266	12102297	10259241	11459995	7941651	9191517	16144933	10792701	8019892	11251252	14544156	12312213	10676358	10750309	6899894	11714146
		N-acetylmethionine	1589	LC/MS Neg	1083	1787	190.054	65-82-7	448580	C02712	HMDB11745	1329890	1.00945e+06	1147320	811976	1358767	762001	759288	1270728	693539	301934	1244466	930766	1295621	921215	912138	887714	565830	81213	953354	1218555	857019	1017112	3012332	1098968	579110	1075845	ND	290389	556936	853099	1221854	1237064	956199	1282288	799253	454604	829639	854719
		N-acetyltaurine	48187	LC/MS Neg	100005466	800	166.018	-	159864	-	-	1986256	1435897	1305718	655119	1320625	994795	1230069	1428540	1074498	478089	1846193	1190449	3.05118e+06	864135	974658	1093181	1150660	539840	1354417	1076360	1431327	1.02147e+06	1074400	1301689	899820	1256146	911590	481933	1036853	1381420	1394261	2360260	895123	1412743	1018520	1250397	1574533	1311391
		N-formylmethionine	2829	LC/MS Neg	194	1543.8	176.039	4289-98-9	439750	C03145	HMDB01015	2780678	2.05149e+06	2380490	1785939	2620803	1796276	2361101	3036425	1637183	886394	2448824	2366189	3292669	2187011	2114970	2383314	2108445	668565	1961673	2853511	2016129	2113843	1837753	2183703	1773551	2255933	1252691	844076	1678239	2129215	2660274	2749487	2187284	2600714	2379684	1703093	1851280	1801418
		S-adenosylhomocysteine (SAH)	42382	LC/MS Neg	197	1832.4	383.114	979-92-0	439155	C00021	HMDB00939	113135	82204	98660	61405	130863	80263	87908	131760	81737	17208	101929	93073	130617	73450	70929	86342	76835	ND	107836	106782	68041	78442	259538	99772	86697	79400	33152	22720	54267	61390	67292	89301	59665	70356	101376	46994	72583	119214
		S-methylcysteine	39592	LC/MS Neg	100002749	880	134.028	1187-84-4	24417	-	HMDB02108	759368	504889	740097	410374	386915	495670	492068	508736	1115278	340405	1486089	962205	1282131	598529	1762268	802167	357606	384467	320599	1.04766e+06	1053337	464350	358131	584259	770331	424833	627415	550087	539924	1207791	2900611	1236037	1547358	1947404	1384368	780706	881888	935201
		S-methylcysteine sulfoxide	43378	LC/MS Pos Early	100002927	900	152.038	6853-87-8	82142	-	-	12909194	10545646	12891342	6888549	7705458	5905455	8588929	7.73282e+06	21026820	10922955	40991744	10850358	17472780	6949698	19898280	8680105	5402742	6577780	2818198	14784323	28770770	13206746	5716303	13554433	12029768	11484760	15085313	18493276	13798807	20804144	31571384	19965644	19421420	28385174	19393826	11865098	9724107	7879235
		S-methylmethionine	38127	LC/MS Pos Early	100002183	2584	164.074	3493-12-07	458	C05319	-	401749	828355	ND	1270080	67971	605972	748367	1196344	1383651	1459061	2247994	106978	360809	523280	2845546	ND	ND	ND	401345	1815591	2889781	158863	1782307	912076	103248	554303	660963	910216	1980321	1886150	210024	526942	328779	966464	695132	118220	533929	344396
		taurine	2125	LC/MS Neg	512	690	124.007	107-35-7	1123	C00245	HMDB00251	14058658	12753740	11109392	7.26293e+06	30582578	7559127	9247181	7558095	13345107	3.48671e+06	11992860	8901484	6.73812e+06	9692362	7559517	12429870	8.23575e+06	2744136	7.5319e+06	7361666	8635572	6508415	21312220	15518762	9922195	11554070	3.64486e+06	4267131	14126429	8733406	8187886	5194270	7.7583e+06	12111826	10529548	5405714	5671324	11684158
	Phenylalanine and Tyrosine Metabolism	2-hydroxyphenylacetate	1432	LC/MS Polar	235	858.6	151.04	614-75-5	11970	C05852	HMDB00669	339316	405540	537675	399169	648823	478583	485984	410021	234209	496422	633998	433303	785785	418925	771361	483077	522682	276775	348292	407920	959140	826769	441707	675447	438866	445911	565598	247277	564837	353753	274415	393771	244234	363662	370511	506540	533847	372437
		3-(3-hydroxyphenyl)propionate	35635	LC/MS Neg	100001624	1980	165.056	621-54-5	91	C11457	HMDB00375	137042	314246	166145	ND	ND	7525040	552911	294313	1077365	ND	ND	137583	297545	1654525	10593126	ND	1027696	1201683	1328198	3568778	1774021	ND	ND	301541	284022	514032	579089	550538	421178	ND	185144	241702	2717582	7873316	215037	1538753	1323828	1669979
		3-(3-hydroxyphenyl)propionate sulfate	45415	LC/MS Neg	100005391	1294	245.013	86321-32-6	187488	-	-	ND	274379	455580	207106	144628	2989834	195657	174180	833519	27608	45115	55194	258190	352409	3160099	ND	216863	177503	1130709	1560873	692093	755313	225834	128728	133988	307856	150516	156836	473035	489970	271605	202259	503774	2540709	187584	310712	618986	1226201
		3-(4-hydroxyphenyl)lactate	32197	LC/MS Neg	240	1379	181.051	6482-98-0	9378	C03672	HMDB00755	16900028	6552623	15699909	10024915	24442712	12500035	15102474	15927987	5856152	5082265	16567280	8904649	12175957	13075679	12983163	14230815	17116688	5498700	17295172	12163579	6901870	13455164	9048340	14408971	11949286	11990677	12200147	3787761	9176990	14352256	10132087	9475358	10524713	13966922	15814763	14154831	11080214	14385943
		3-(4-hydroxyphenyl)propionate	39587	LC/MS Neg	100002914	1670	165.056	501-97-3	10394	C01744	HMDB02199	ND	ND	ND	ND	ND	121452	75977	26866	ND	ND	ND	ND	ND	410337	319912	ND	202399	132458	122845	524476	81294	ND	ND	ND	140935	ND	ND	ND	126329	ND	ND	70863	278879	4604147	ND	165287	165811	121384
		3-methoxytyramine sulfate	44618	LC/MS Neg	100004634	1722	246.044	-	-	-	-	315633	41911	37158	55168	56899	29996	45716	132262	42941	ND	3012098	36312	37807	28009	39906	39630	40322	ND	85193	49030	41160	36431	51934	69613	63689	45713	ND	ND	19134	50988	35685	31821	40340	44056	36867	35630	ND	29430
		3-methoxytyrosine	12017	LC/MS Pos Early	1342	2555	212.092	300-48-1	1670	-	HMDB01434	39335448	1.87867e+06	1458229	1013098	894111	1411854	1058763	2296161	1.49338e+06	1076479	90488976	1437571	1793193	961359	1831786	928411	1132774	756633	1287813	1641536	1907005	1463541	844939	1027229	1151552	1158531	1811822	1524638	1172910	1.24222e+06	1541751	1298479	1182170	1774128	701137	1083833	1131426	1796383
		3-phenylpropionate (hydrocinnamate)	15749	LC/MS Neg	100000010	2860	149.061	501-52-0	107	C05629	HMDB00764	1243640	2364496	247226	832183	1171378	162650	2009424	722298	4033142	141225	1574919	893157	1264199	71808	275651	ND	147672	139011	170365	877698	2347755	457927	876827	1480036	ND	2128719	1382911	2135328	145751	1.89476e+06	1611430	469940	ND	267493	ND	79698	199407	ND
		4-hydroxyphenylacetate	541	LC/MS Neg	144	1361.1	151.04	156-38-7	127	C00642	HMDB00020	331069	ND	ND	ND	228686	850267	238227	249605	ND	ND	ND	201214	874503	209431	ND	ND	ND	128222	ND	327172	373554	134898	251783	242552	697973	ND	ND	ND	778985	ND	292117	447966	ND	267081	716606	342306	297959	ND
		4-hydroxyphenylpyruvate	1669	LC/MS Neg	1141	1690.1	179.035	156-39-8	979	C01179	HMDB00707	1013463	900735	972893	1022623	2182465	1633081	1606486	1614507	842051	736771	2207466	1114524	1279036	1769439	1165056	1785121	1960161	650278	2130319	1090558	977235	872419	623382	1966946	1408320	1322308	985925	651394	1149463	1399376	1339229	771895	1260642	1043409	1545654	1461270	627012	1561235
		5-bromotryptophan	53242	LC/MS Neg	100009338	3525	280.993	-	96735	-	-	875197	750787	767493	1783280	1462497	2007518	1462178	1344087	749315	1013767	700405	1590019	1554319	1232741	1133705	1567439	1959435	576811	1055881	2089580	719574	684576	1408561	1253915	1645993	1589289	613786	579051	1331174	1421267	1351780	843970	1148347	1378850	1393372	1652100	872900	974012
		catechol glucuronide	53243	LC/MS Neg	100009326	1742	285.062	-	-	-	-	270425	52322	ND	ND	31344	ND	ND	29181	62482	ND	23380	24401	49851	ND	37745	ND	ND	ND	357371	ND	63800	52589	ND	30238	ND	76942	ND	ND	ND	15674	37119	83052	ND	71269	ND	ND	ND	ND
		dopamine 3-O-sulfate	48407	LC/MS Neg	100006361	1556.2	232.028	-	122136	C13690	HMDB06275	2112997	478199	143651	668706	220774	269101	201844	3.96775e+06	319166	203152	14893343	362031	918509	286004	801870	215769	390058	67995	479410	473938	432594	244714	555043	670660	271544	169831	916982	195409	301899	378693	226766	264611	269344	379558	217983	326339	216847	214869
		dopamine 4-sulfate	48406	LC/MS Neg	100006360	1511	232.028	-	123932	C13691	HMDB04148	463650	84881	ND	98543	71590	47802	25464	721851	85876	50044	5752509	73202	228134	53444	132610	23080	74564	ND	140082	82691	104135	40845	60303	210954	53297	ND	240497	28103	48206	92129	41691	ND	58110	57838	ND	78694	20978	46918
		gentisate	18280	LC/MS Neg	100000447	1459.8	153.019	490-79-9	3469	C00628	HMDB00152	ND	192465	ND	ND	379824	ND	ND	ND	595633	214663	400998	ND	230525	175425	101537	ND	366570	ND	ND	ND	887735	51443	ND	426881	751251	525083	253316	163422	171094	984458	129199	230466	401125	132011	ND	494957	77025	38558
		homovanillate (HVA)	1101	LC/MS Neg	117	1649	181.051	306-08-1	1738	C05582	HMDB00118	117806	ND	111993	ND	76336	112421	74402	137210	ND	102724	2628090	50962	143321	96162	112327	43108	106104	27775	103463	71378	100191	208921	65726	73412	100293	76346	169153	ND	113997	69454	121290	73066	89548	62713	118876	74311	ND	ND
		homovanillate sulfate	38349	LC/MS Neg	100002250	1047	261.007	38339-06-9	29981063	-	HMDB11719	71894	ND	45221	ND	85167	ND	ND	73852	ND	ND	1197091	ND	42793	10942	19883	58187	ND	ND	58143	28892	25963	52464	ND	52822	ND	23223	ND	ND	30453	61939	ND	20400	ND	ND	83695	ND	15274	30315
		N-acetylphenylalanine	33950	LC/MS Neg	100001256	2597	206.082	2018-61-3	74839	C03519	HMDB00512	336375	255007	246431	419097	790775	131537	308939	476811	273009	204151	433233	214632	228004	257040	314679	330842	347953	140426	380322	514345	258715	283176	473705	652934	112401	273615	260098	233489	368980	376928	217589	214144	234148	518265	392206	377946	333325	301808
		N-acetyltyrosine	32390	LC/MS Neg	100001104	1680	222.077	537-55-3	68310	-	HMDB00866	234594	97665	240382	208199	334813	57194	170498	240122	188307	65838	260380	97898	154598	145775	178626	160992	210687	67874	260700	297759	109576	333561	196775	277983	ND	178645	97631	136857	164772	163167	100627	127614	119288	253161	142646	169675	136071	197569
		N-formylphenylalanine	48433	LC/MS Neg	100006056	2360	192.067	13200-85-6	759256	-	-	109639	ND	75442	129000	ND	122670	147231	205908	116977	29971	192619	96470	72641	146116	82704	178942	65835	ND	109020	163834	ND	65621	232029	94606	97191	216996	71085	ND	209806	134156	103703	68860	159158	198838	212468	71360	ND	97951
		o-cresol sulfate	36845	LC/MS Neg	100001806	2796	187.007	-	11615528	-	-	321450	993836	92635	64487	133375	26986	25863	207969	160760	34836	48942	371176	47613	56222	100808	32921	88334	163082	702192	169991	1100437	467831	171599	239796	ND	34462	114142	327396	42323	218807	ND	ND	71287	287806	ND	38300	58085	25356
		p-cresol sulfate	36103	LC/MS Neg	100001315	2890	187.007	3233-57-7	4615423	C01468	HMDB11635	770449088	820391104	342730112	325612032	458951872	383597376	190820400	580925696	1078455424	116699536	744394112	598994176	634177152	350265312	134374080	6.4251e+06	555637824	373391968	364363232	495590240	759993088	503282400	285473824	329440832	588229184	230323008	324353120	889531584	331762912	236080736	613355008	613758208	295610560	302656992	4362373	587514880	443445184	100784880
		p-cresol-glucuronide*	48841	LC/MS Neg	100006191	2420	283.082	17680-99-8	154035	-	HMDB11686	5236242	10168034	1.87233e+06	2426660	1.94245e+06	2307930	579427	2389914	5221143	44963	3.90271e+06	2966369	3858692	809808	863548	ND	3411398	944882	1.99425e+06	1.99566e+06	7.85331e+06	4587737	1617586	1378185	3611583	928933	662284	3050133	702049	215923	5241352	8.19115e+06	668285	1983215	ND	5874949	2321179	218439
		phenol sulfate	32553	LC/MS Neg	100001510	2156	172.991	937-34-8	74426	C02180	HMDB60015	56906952	50993524	47317960	29675588	69366368	86832096	34811808	40020404	62267276	41050128	46065196	44769576	94251000	95150312	147510736	14110683	82257640	219830688	347171104	48036376	62233200	101320096	51698280	59640272	129069664	38977892	29388718	59133308	43297984	94532368	42678704	48096176	110757464	112928072	16219651	27636984	279450720	238735360
		phenylacetate	15958	LC/MS Neg	100000011	2150	135.045	103-82-2	999	C07086	HMDB00209	581261	210238	136585	141351	204816	330337	80391	224323	682135	ND	753321	288830	323652	152590	199133	ND	ND	149458	278194	211334	224821	ND	184486	157072	612072	ND	ND	397420	ND	ND	359993	324125	286744	ND	117663	236932	129759	ND
		phenylalanine	64	LC/MS Pos Early	460	2878	166.086	63-91-2	6140	C00079	HMDB00159	967529280	895581312	752653312	864259392	1057565952	938063296	972542720	1057894464	734422848	857668672	1094698752	832725568	848750976	900011392	943790272	1012756416	856555200	745939712	1021741056	889611584	924986944	807978496	906823232	1050908288	885743488	1040170816	966093120	659266496	987713472	916819840	899428224	772817792	995981824	999691520	1041147712	815478144	875517248	906911168
		phenyllactate (PLA)	22130	LC/MS Neg	100000774	2208	165.056	828-01-3	3848	C05607	HMDB00779	1527388	889024	1269971	1222105	2621971	1434421	1510060	3144486	757633	1531221	1.85156e+06	1246424	1378398	1.46913e+06	1.88201e+06	2574602	2193150	1227669	1652400	1459253	1240878	1312741	1202240	2604046	1155513	1506791	2558465	639357	2198905	1.5196e+06	1337229	1077948	1.50281e+06	2287805	2794831	2344474	1.61298e+06	1152379
		phenylpyruvate	566	LC/MS Neg	241	2517.6	163.04	156-06-9	997	C00166	HMDB00205	256746	258305	166306	280078	393170	284347	259490	331454	183005	303178	337269	183590	252367	245824	311610	414421	342937	218435	392180	255948	283760	148993	277013	417972	204011	363720	273967	251988	426533	311190	319937	305571	380481	382549	304476	346169	256018	263271
		thyroxine	2761	LC/MS Neg	1094	4808	775.679	51-48-9	5819	C01829	HMDB01918	1211651	1021661	857025	1.04514e+06	834009	1.00903e+06	711340	756106	652532	912786	810180	1125401	1100452	1167923	1174561	613872	804158	715482	1028581	912253	937042	743354	981825	842193	1071055	687373	641814	573054	996100	788829	1173619	1047979	1118675	1106602	609803	750818	962834	1228415
		tyramine O-sulfate	48408	LC/MS Neg	100006092	1565	216.034	30223-92-8	153005	-	HMDB06409	51624	105325	54952	88355	171245	790640	130535	207241	91104	35959	236891	255117	436862	98013	131665	265508	315615	731637	342071	72294	116236	122045	78284	121995	896601	108121	39365	31133	181444	100214	202143	755394	174341	58249	955465	220319	168242	ND
		tyrosine	1299	LC/MS Pos Early	815	2430	182.081	60-18-4	6057	C00082	HMDB00158	343758784	233021200	349366848	276929184	350046784	369429888	311805376	376129920	241318240	162036992	400540512	260658272	320652000	297913248	292013440	444973856	332719680	176981376	378027840	348600448	237267344	350433792	272832960	316862688	341871840	286208576	264911424	204647824	189825600	329442048	313818144	235065344	383616608	302963872	300356160	262083600	259448112	432088128
		vanillactate	54910	LC/MS Neg	100006129	1625	211.061	2475-56-1	160637	-	HMDB00913	4957871	129886	241142	90426	134209	117593	98046	326606	81083	79408	9716938	86494	188824	102954	118199	103983	131140	ND	187239	134132	173365	161148	146611	140055	118702	141747	194050	53625	104574	105684	111211	186933	71643	128780	121957	164191	103169	95802
		vanillylmandelate (VMA)	1567	LC/MS Neg	1111	941	197.046	55-10-7	1245	C05584	HMDB00291	924333	594789	529401	654482	605588	505742	580951	687498	334831	199030	686323	628871	527136	696914	480792	388744	421087	151438	597057	972293	704269	531249	571857	524323	612427	509709	305362	177818	315591	623190	835044	394352	538569	514838	401290	367020	438389	471968
	Polyamine Metabolism	4-acetamidobutanoate	1558	LC/MS Pos Early	1113	1350	146.081	3025-96-5	18189	C02946	HMDB03681	14012300	8839933	7962298	6112372	14392951	13110328	9763973	19067924	13785635	21303132	11081970	6620387	13450092	9085824	12429935	8108294	7946171	6142970	10853685	16445338	9024893	9993978	7852094	10337705	9399142	9008900	11022647	14198066	8837016	11026273	10112268	15772149	7725991	9776792	9869245	7921979	9102684	8974045
		5-methylthioadenosine (MTA)	1419	LC/MS Pos Early	212	2752	298.097	2457-80-9	439176	C00170	HMDB01173	1780911	1256974	1486070	1343997	2385788	1765875	1420786	2385300	1359862	903310	1872286	1116942	1774924	1167928	1471017	1164095	1563699	779724	2173819	2002621	1190713	1459474	513133	2355150	1749513	1380311	1259428	953662	1105989	1164232	1228737	1496846	1399834	1449283	1747251	1306149	1302571	1867223
		acisoga	43258	LC/MS Neg	100004541	2297	183.114	106692-36-8	129397	-	-	124547	82416	236584	145608	126308	79609	83356	172302	71390	135901	187043	162713	98197	117744	97559	94768	118670	88777	89713	142934	116543	194064	127146	193188	107855	111903	145522	66456	80705	68594	196800	83661	109827	134404	170245	142717	71972	128205
		N-acetylputrescine	37496	LC/MS Pos Early	192	2230	131.118	18233-70-0	122356	C02714	HMDB02064	2869390	2257737	1738053	2066309	2623044	2530987	2551095	3.18071e+06	3363563	1590891	2898871	2328839	3889938	3562320	2091063	2.5944e+06	2840929	1600424	2141168	2834420	2669868	1757977	2116438	2128546	2495827	2170398	2788460	3003235	1456923	2497798	2418120	3571875	2833558	2373761	2866355	2679790	2797560	1830856
		spermidine	485	LC/MS Pos Early	50	3355	146.165	124-20-9	1102	C00315	HMDB01257	642671	861178	1342147	297905	2656242	618196	1128572	586045	1347416	255172	537256	722240	670850	437095	535424	1064948	689376	96918	582807	1101069	487668	582968	10709919	1.38321e+06	835891	1244879	123263	267683	775126	525683	406971	518149	469898	1010623	967502	367466	288134	736857
	Tryptophan Metabolism	3-indoxyl sulfate	27672	LC/MS Neg	100000467	2222.2	212.002	2642-37-7	10258	-	HMDB00682	71928816	81681312	42414300	51271756	107029744	86063344	59992540	60765860	50444284	58030200	105377960	36632096	99047896	74153176	52267992	39112416	79283864	90219416	86965504	94923440	65595068	59872676	62636896	98407488	90462104	64949968	24101166	48574604	84388840	60302956	37754928	83310616	72482336	70364096	79754248	96390824	135495312	41594440
		5-hydroxyindoleacetate	437	LC/MS Neg	71	1510.2	190.051	54-16-0	1826	C05635	HMDB00763	138861	66048	66734	63877	102115	50984	61773	147986	64587	29783	109061	42183	87042	77571	57345	75603	53202	21171	73705	79275	66873	68062	86607	110172	47180	58605	60461	28370	58416	64724	46039	85182	56245	94086	83316	56483	45354	56137
		C-glycosyltryptophan	48782	LC/MS Pos Early	100006379	2685	367.15	180509-18-6	10981970	-	-	2149498	1439704	913744	984577	1738844	1172925	1087625	1666248	1637740	1500710	1456986	779804	1038728	1216813	1558753	711599	1507263	761792	1135287	1218855	1214711	776440	1328834	1950995	842517	1433199	1797376	1043970	1620693	1473259	1002940	1700416	612162	1888902	1397445	1461441	889183	1387975
		indole-3-carboxylic acid	38116	LC/MS Neg	100002185	1708.8	160.04	771-50-6	69867	C19837	HMDB03320	121477	112384	58862	68018	93469	48620	63407	97414	218744	ND	113279	120395	64728	60817	34811	76846	62118	17285	52592	47703	80742	42064	79148	75483	47901	74060	ND	103605	30938	74584	132118	46151	57689	42835	87392	40992	43457	55341
		indoleacetate	27513	LC/MS Pos Early	100001034	2850	176.071	6505-45-9	802	C00954	HMDB00197	33111236	36645900	35978780	47223112	59813636	172362112	30905232	34072372	54333884	80710080	45668808	35819808	48616808	59584372	35756620	62206672	57978972	44241948	34199740	62446072	70752400	40607824	77014544	53649928	195356848	32959212	22418360	36013036	129201568	53380084	57670720	26135416	49972256	25145948	116193472	45716864	86871032	36247644
		indoleacetylglutamine	42087	LC/MS Pos Early	100001731	2185	304.129	-	25200879	-	HMDB13240	537051	ND	ND	563444	730443	1475375	253678	777814	334465	723088	1116350	116857	816086	114798	ND	779930	236849	457768	189706	608387	377138	91949	1.17367e+06	848903	1283042	265127	529324	263690	1038514	364626	130556	630210	120771	ND	1375241	147134	924870	222338
		indolelactate	18349	LC/MS Pos Early	100000463	2600	206.081	832-97-3	92904	C02043	HMDB00671	18221336	15027690	14671732	18930864	38215680	15288449	21561176	32814408	15504578	25471332	19864404	13742524	29018316	17472788	20968028	26953772	27502392	16278683	33240286	31490592	21121748	14370896	24777804	40331224	14894936	21416928	22285690	13023087	31672342	26153456	12933510	18690324	18906740	23079844	21655936	27009980	24514592	20799308
		indolepropionate	32405	LC/MS Pos Early	100001083	3205	190.086	830-96-6	3744	-	HMDB02302	29084154	68562904	18304764	25816520	5804002	8299979	26447444	18925140	38726824	6672901	25011484	38052480	19636316	59564680	113985344	ND	27899560	10151422	6731731	73258664	53900096	17592916	24748620	15075166	9269007	37624404	34416048	21655432	1818774	110468768	40178992	12214846	116124512	161275936	67048	35879420	20994412	8757621
		indolepropionylglycine	54917	LC/MS Neg	100010863	2926	245.093	-	7677842	-	-	47025	106019	ND	68284	ND	ND	80320	81027	33240	ND	36536	80792	69590	49834	79424	ND	31758	ND	ND	132433	54713	ND	65488	25747	ND	103084	72615	ND	ND	220167	70004	94270	138993	112936	ND	27976	62844	ND
		kynurenate	1417	LC/MS Neg	98	2224	188.035	492-27-3	3845	C01717	HMDB00715	927661	784350	1055765	1268620	1776795	524140	1261319	2199694	394955	369272	965008	844012	942595	874020	1002410	1.54039e+06	933880	387034	1117564	1170792	883331	702611	1.68951e+06	1795128	600095	1317480	1048786	299324	751770	1411693	1066333	1022759	1396084	995863	1559185	806206	879560	1222269
		kynurenine	15140	LC/MS Pos Early	100000265	2739	209.092	2922-83-0	161166	C00328	HMDB00684	40517780	24418440	26780160	27580066	49841228	24821792	34550032	50411752	37340520	37175600	28220682	26177926	40081652	29821016	33920128	40590044	47603268	26244918	43747052	37475896	24497248	23656916	29639846	43427572	26184000	38958300	46672364	34233488	37499248	37731560	25217532	37123352	24653702	34796112	41786896	42084740	24469568	45471184
		N-acetylkynurenine (2)	48757	LC/MS Pos Early	100006378	2364	251.103	-	-	-	-	332721	129699	ND	854145	1269587	ND	576423	827178	487966	ND	454391	ND	ND	201214	413470	618905	ND	ND	342242	650302	ND	ND	1210072	1.03318e+06	77900	284308	ND	ND	ND	984062	ND	152836	ND	376670	737899	ND	430527	ND
		N-acetyltryptophan	33959	LC/MS Neg	100001254	2630	245.093	1218-34-4	700653	C03137	HMDB13713	285848	167451	99476	257676	265022	92333	262623	624368	124252	100737	317269	170161	201333	201216	122701	339082	337818	128811	343661	274774	180866	125484	306964	301694	84896	236360	191074	110936	168016	344421	123897	166663	147239	192877	303794	325620	317271	193555
		picolinate	1512	LC/MS Pos Early	1022	910	124.039	98-98-6	1018	C10164	HMDB02243	1409584	560693	1147079	1179188	1696079	643355	705557	1447690	1005851	410043	1637345	681872	829131	1503269	1175544	733150	989920	579542	1134643	858146	577957	767510	1635649	852545	1711616	860829	1164058	1284171	547554	905160	1.045e+06	512639	2252935	1266059	733064	988002	465795	816616
		serotonin	2342	LC/MS Pos Early	504	2550	177.102	153-98-0	5202	C00780	HMDB00259	18551540	14946288	14270354	11788058	87493400	6556548	10989933	9636187	3.89257e+06	174576	12745519	8975481	337931	13239607	9695608	25348184	8617976	ND	201211	10999875	9135989	5720877	24322888	35843020	12971545	15107434	716653	77906	21281658	12110865	8.11758e+06	215219	11615329	18441656	21231052	4368994	3.5221e+06	372420
		thioproline	53231	LC/MS Pos Early	100009232	1250	134.027	34592-47-4	93176;6973609	-	-	24405074	19190420	19479352	33270984	28516464	18460058	20690916	20830938	24506420	51093336	11699125	16131393	16871640	27422892	27912620	21688184	21637288	26531210	20955892	46733112	22660252	14369510	47393772	15174030	22675962	20336538	12415155	21760456	33626484	21829252	20119184	18710376	22147216	24215856	23547852	6488707	24605556	28547980
		tryptophan	54	LC/MS Pos Early	565	2986	205.097	73-22-3	6305	C00078	HMDB00929	510863360	462169088	395939200	552798272	544774528	607020160	569376896	531069376	458302784	448046528	546667264	475758624	555238912	504772256	472175936	586919040	530482464	421095264	550596416	555510656	453869920	401965728	530970656	520608736	542565376	557854976	462081600	417337536	470392384	573960640	468722880	438322880	537806528	527588768	577192128	474570912	452634880	447696352
		tryptophan betaine	37097	LC/MS Pos Early	100001743	2673	247.144	20671-76-5	442106	C09213	HMDB61115	82418864	9229433	62224880	10844117	28798330	67339496	108224240	16203691	29869116	81980224	91928768	93486840	24809188	14402009	140658944	21623952	90841144	66457996	47760996	116434056	8792259	60747440	19823572	23959930	51465448	93278368	13746210	17202984	98153992	15500632	81698488	9054804	8246025	145893920	15108439	80278440	77886856	31081600
		xanthurenate	15679	LC/MS Neg	100000015	1476	204.03	59-007	5699	C02470	HMDB00881	93055	74295	65875	222558	236693	71849	94822	157858	29702	36400	128749	58578	105295	94704	55329	185192	96359	42695	241426	141770	87016	63833	319927	166702	134194	84075	47687	ND	93257	198459	81749	89971	155034	67089	200802	69512	133521	152314
	Urea cycle; Arginine and Proline Metabolism	2-oxoarginine*	55072	LC/MS Pos Early	100002784	1760	174.087	3715-10-04	558	C03771	HMDB04225	237850	148376	60216	440406	620228	228983	414926	296705	131630	84112	486558	167612	371540	191165	203859	397941	365049	222202	337143	186908	229433	133064	436566	414218	529926	356867	103459	70455	237742	143087	98827	304806	359041	217601	375326	263958	189002	ND
		argininate*	57461	LC/MS Pos Early	100002769	2150	176.103	157-07-3	160437	-	HMDB03148	4480675	2645696	2246599	6197882	4974100	2047320	5929626	3767432	1.96917e+06	2133444	7870160	2036965	4256774	2936967	3664330	5082163	4505898	3412124	3043600	4096587	3.29987e+06	3330151	6104499	3167801	6023145	4907956	3398951	2056933	2590361	3655580	1465210	2946491	5991626	2628874	5885707	3.83159e+06	3.65445e+06	2621110
		arginine	1638	LC/MS Pos Early	231	2825	175.119	1119-34-2	232	C00062	HMDB00517	801207808	746420480	584645760	546656704	756413696	624532992	769009856	566005184	680956800	572365824	912414656	739116480	565735488	809819776	753980928	633900608	544399488	641146304	644891456	764858048	802738944	653792128	272387072	709541184	718547392	787682112	377714304	521200480	590815360	667711424	622376000	561937280	738311744	742191488	640367744	508015264	873057408	657359360
		citrulline	2132	LC/MS Pos Early	391	1520	176.103	372-75-8	9750	C00327	HMDB00904	915358784	783615168	853993472	839086912	1001233728	631195136	812016320	664642048	769766080	927050560	1100607744	836260864	968821312	798893824	941326080	851741312	800118016	823130112	798695552	855829888	1042499776	919793856	704501824	882183040	860338496	912022208	569090368	846494400	778670592	864301952	853242496	837463616	879611712	937501056	910626432	611410112	999247936	880433984
		dimethylarginine (SDMA + ADMA)	36808	LC/MS Pos Early	100001810	2850	203.15	102783-24-4	123831	C03626	HMDB01539	65050432	49456696	46820080	43302308	70887024	54130076	46385240	72890816	50323564	38900272	69867344	53828692	57243272	47840988	54883660	52942068	45345296	32892980	52426888	55967124	53668384	47337880	39216072	68683032	46473120	48569056	53009384	42963788	39909484	52348212	52347744	50634888	43866704	67158080	52041328	41315148	47752500	49612764
		homoarginine	22137	LC/MS Pos Early	100000961	2882	189.135	156-86-5	9085	C01924	HMDB00670	34423776	36743824	12923196	57290868	44174208	50462324	35420384	31843760	18071604	18202698	33522618	25179550	43840384	35164592	32922812	36539344	26221520	25633684	23917234	22584658	46301500	14166111	42635544	46409960	55663524	40228784	22363618	13803083	13897352	28912488	23226890	40195244	35711576	41656980	35883836	23589822	26259486	27361544
		homocitrulline	22138	LC/MS Pos Early	100000963	1908	190.119	1190-49-4	65072	C02427	HMDB00679	8438501	3628214	8659527	6951519	6721501	4081434	1930344	7213377	5815942	5728518	14244503	10156858	19548964	1848421	6082749	5641729	7652367	395631	10286815	6821433	9498905	20342712	4110100	6126991	7224421	5425324	4516464	8058977	2254684	3818272	16042492	11445883	7642090	7851099	5430741	4758565	1312658	14879609
		N-acetylarginine	33953	LC/MS Pos Early	100001266	2245	217.13	155-84-0	67427	C02562	HMDB04620	4909187	4500054	4403689	7442850	7.9824e+06	508552	3.70818e+06	3636578	6271921	3552956	6.85829e+06	3446976	3209416	4333602	7828991	2343024	3844092	3422208	3249376	7587636	3767863	5096714	7337015	4789413	597813	3264057	2732703	5289310	4271403	3393132	2925823	2751774	5092679	6889440	2462940	3942490	4323203	3193465
		N-acetylcitrulline	48434	LC/MS Neg	100001577	940	216.099	33965-42-3	656979	C15532	HMDB00856	164447	95428	111290	383933	789225	ND	114322	245447	210458	42662	331128	76016	124486	100192	302686	84055	183210	43481	180789	350759	112967	98187	286194	291514	ND	118228	66843	92997	123223	158072	67777	93363	146969	272197	103525	143796	101690	68601
		N-alpha-acetylornithine	32984	LC/MS Pos Early	100000285	2000	175.108	6205-08-09	439232	C00437	HMDB03357	418392	270573	186965	213466	394249	366253	260356	663593	380365	152254	725716	178686	281187	285068	551257	316986	260331	ND	233038	396808	306067	200891	649594	346933	195478	239035	504227	287825	408200	271077	194623	231207	270039	453869	404860	301368	158121	203415
		N-delta-acetylornithine	43249	LC/MS Neg	100004523	858	173.093	-	9920500	-	-	4263668	4048828	1.57523e+06	972818	924666	6841268	1665147	7010097	1646881	1107723	3233997	2434702	2818806	2754473	3013379	4375266	1990646	776596	2429517	1075909	4593444	2521503	719823	1413731	7805246	2250681	3883316	789298	2003816	5059933	4438483	3779390	3337924	4400889	4503518	3.27148e+06	2198763	2781058
		N-methylproline	37431	LC/MS Pos Early	100001956	1335	130.086	475-11-6	557	-	-	201865440	294636544	72276112	38065680	12075792	8729622	19955688	143774992	44616888	17928378	50990788	19615656	17876220	231352176	264683232	117554472	40252928	4985833	15424639	5.79541e+06	52945640	63471120	9541049	153236864	11556571	20647164	195906976	13419777	88357728	130690728	46903616	33181552	57125184	295267168	147952736	32039508	8075355	11737997
		ornithine	1493	LC/MS Pos Early	444	2800	133.097	3184-13-2	6262	C00077	HMDB03374	505070112	417398464	374471328	432273952	396559040	489842496	432580032	487118080	439014176	412153472	560468864	348095392	319818752	413091744	532463616	436688576	357024992	460103840	390212160	394844352	381848064	434356512	487460128	357700960	496772224	423337952	492591360	389738848	438848256	533821248	334631168	280880384	352159616	549614272	447300608	365843168	442200736	350963168
		pro-hydroxy-pro	35127	LC/MS Pos Early	100001167	2128	229.118	18684-24-7	11673055	-	HMDB06695	11747548	15974359	10774971	8894520	18207232	9496867	8853349	10311969	17721276	23975272	8684946	12833798	16368219	6.24648e+06	16323469	10440245	9132925	6458542	6493949	17065398	15975423	12015112	7229256	9105080	12993040	9570370	7231098	26677868	20910020	10328365	12421866	13201300	12574545	18821392	8575705	7266322	10889201	7002363
		proline	1898	LC/MS Pos Early	480	1603	116.071	147-85-3	145742	C00148	HMDB00162	2002475648	1628935424	1770462464	1524598528	1733149056	1723443328	2048091648	1808872192	1652689792	1589789824	2030844032	1597117312	2008795776	1705224064	2109061888	1697894272	1956115968	1588734720	1455784832	1901601408	1761615360	2104925696	1525975936	1619221248	1591126656	1791378176	1494996480	1493179520	1824107264	1686843904	1488884480	1870622336	1596484992	1958056064	1715511424	1638082304	2395820544	1514610688
		trans-4-hydroxyproline	32306	LC/MS Pos Early	1001	1064	132.066	51-35-4	5810	C01157	HMDB00725	184536384	139665136	81297368	144892336	178579376	143278176	100286504	164182528	146571728	192350752	115891616	128281424	240336320	114468728	153051712	227476768	150902992	101911448	89129696	122557936	119353880	176317680	135409248	117371032	113998184	82311104	69125440	144903616	245813120	105966640	92308760	300711808	214208800	143810544	144544032	129781760	117876016	99282456
		urea	1670	LC/MS Pos Early	533	700	121.072	57-13-6	1176	C00086	HMDB00294	624514304	514219968	663810496	563134848	641575424	385799488	414456704	649363456	415339264	408836608	1064471168	636708864	539703744	358264032	555389504	480180320	461957696	427772992	691324672	432417440	607572288	800124416	552018496	444996416	532714208	439028448	648928768	485287392	490660992	581657344	696730560	563188864	496989568	413777536	603073792	447010464	345756864	541015360
Carbohydrate	Advanced Glycation End-product	N6-carboxymethyllysine	36713	LC/MS Pos Early	100001768	2500	205.118	5746-04-03	-	-	-	748616	635269	356937	497538	595966	955716	783806	977105	834416	88439	1166370	234231	564310	547952	785527	823739	862840	ND	1004750	604502	572687	818984	880178	659114	933505	983791	357881	265022	545347	977251	482612	553634	635338	527341	540216	490938	478217	570950
	Aminosugar Metabolism	erythronate*	42420	LC/MS Polar	100001320	2186	135.03	88759-55-1	2781043	-	HMDB00613	180970576	116855472	116971664	112040952	176510928	162546032	136833536	265187008	145102048	89806336	191216576	110430192	184109744	123348480	163518384	178010368	161948384	62631540	155536688	148088752	127574632	118885336	119251520	219082144	118504328	131867912	168586672	107370856	103788808	149889936	124238504	175510512	119034384	147541952	158727120	187786928	115401832	131750792
		glucuronate	15443	LC/MS Polar	100000257	3233.3	193.035	207300-70-7	444791	C00191	HMDB00127	12093709	15486140	43092912	8618280	22709902	23089916	11771849	26743750	14460163	2308335	20134692	10532873	19938192	7.4644e+06	11887283	14170130	4925053	1570055	17125958	11070897	14819077	37639288	7058027	24535778	17786792	13985050	4589390	3818274	2.97116e+06	12769429	13503970	31117672	8005811	12262515	14473436	4625172	10883742	11793858
		N-acetylglucosamine/N-acetylgalactosamine	46539	LC/MS Pos Early	100006435	715	222.097	-	-	-	-	3711479	2100127	2648846	1732330	2.83407e+06	2428882	2194015	2700470	1.73925e+06	2248104	3602677	2055893	2486751	1828154	1.66855e+06	2720135	2392180	2237830	2353488	2629150	1.74695e+06	2345019	3934708	2585068	2182247	1944393	2938307	2546224	1575741	2034776	2093701	2403482	1985978	1859546	2466628	2506402	1.96148e+06	2508329
		N-acetylglucosaminylasparagine	48149	LC/MS Pos Early	1215	1212	336.14	2776-93-4	123826	C04540	HMDB00489	272252	355674	420519	461589	845402	651994	353531	652627	762530	ND	355366	351463	479830	223620	460299	495901	321797	ND	379053	628773	260613	333798	1.04456e+06	577819	204333	349990	92738	ND	330461	384014	295067	379427	170546	425817	408843	212110	395004	381052
		N-acetylneuraminate	32377	LC/MS Pos Early	1162	660	310.113	131-48-6	439197	C00270	HMDB00230	2204170	1939262	1485302	1302892	3138340	892984	1474714	2589873	2495408	1065293	1868973	1178084	2162742	2401811	1756419	2334651	1874482	738926	1732833	2721864	1770776	1177215	2225600	2505983	1.56513e+06	1957436	1427720	1324416	2271279	4108511	1.73251e+06	1854449	2085531	2475336	2544210	1551317	1.02356e+06	1639127
	Disaccharides and Oligosaccharides	sucrose	1519	LC/MS Polar	935	3092	387.114	57-50-1	5988	C00089	HMDB00258	817587	125525	73308	ND	170412	93247	62310	238223	58440	54990	1120193	ND	1115362	ND	43153	ND	354658	19507	403329	28441	224890	177999	78177	130086	164456	52882	176105	69621	ND	260980	ND	645119	45561	119256	165618	152321	378318	41917
	Fructose, Mannose and Galactose Metabolism	fructose	577	LC/MS Polar	878	2022.2	179.056	57-48-7	5984	C00095	HMDB00660	11884187	15396776	11179962	10526259	12794690	22682724	8403932	12717324	18917548	7360478	17929946	9278653	26949000	31040598	28908730	32590240	13953292	13135766	41354676	7726295	19937918	8074712	15784902	16324782	20356208	15812773	6937048	11419643	3797466	10601936	16416530	53867120	18104338	10299580	8357076	13060863	22908340	34545864
		galactonate	27719	LC/MS Polar	100001026	3085	195.051	299-28-5	128869	C00880	HMDB00565	8882319	7281830	ND	2823751	175223	ND	5728716	11388455	5235900	313804	4138974	556532	10579137	ND	6244304	6181558	103757	ND	3128044	2088234	5409271	4399348	7765813	8887143	ND	7.38058e+06	1.48788e+06	201802	647777	9270655	944046	1104895	3.91143e+06	ND	2246096	206975	1262192	2690665
		mannitol/sorbitol	46142	LC/MS Polar	100001740	2260	181.072	-	5780	C01507	HMDB00247	13157253	6442317	3582604	2940307	4234930	2549056	1785229	22320448	3834224	8592599	5949871	4.1896e+06	17681772	2337599	23036732	2162752	6185153	9297678	3.54913e+06	6.25055e+06	11112101	3868404	3488804	4419018	3970396	2307889	16281507	15466491	5476816	4590170	3.59072e+06	13013057	2712214	12397634	3.22319e+06	7766443	3306338	38732856
		mannose	48153	LC/MS Polar	803	2200	225.062	3458-28-4	18950	C00159	HMDB00169	5385477	5190373	7344322	3651143	8842848	5634395	4786946	4082365	3907219	2413881	6507248	5048826	6058357	3603875	5450378	6110630	4171808	3283565	3431031	5539287	4884796	6187022	3018479	7804698	4581372	5516705	2934942	2752569	2213074	4025675	5101822	4669466	3619694	5164068	5122674	3558713	3982477	6383492
	Glycolysis, Gluconeogenesis, and Pyruvate Metabolism	1,5-anhydroglucitol (1,5-AG)	20675	LC/MS Neg	100000580	802	163.061	154-58-5	64960	C07326	HMDB02712	151855424	128466232	100003272	63087952	67273152	113903064	164823920	80401984	106636288	50456828	136377072	176724224	133368152	122598400	108315368	107107880	145678272	135857280	180992128	118051960	134911056	103140904	59106948	95761840	101561992	154455376	59437952	68784832	64902072	139955104	165163952	127211456	128286136	102673200	109454480	140425968	205197760	174806496
		glucose	20488	LC/MS Polar	572	2342	179.056	50-99-7	79025	C00031	HMDB00122	815057216	742838592	935091520	727144128	921640960	1116901504	725736000	756439168	787767040	562210624	831474816	759344064	865127040	880632576	1026392448	855150016	713394304	612687296	1144650752	775363648	795844736	786731328	691715712	851634496	943917376	811702848	626441600	747579328	589697152	800947648	766465280	851409088	799348864	840431424	783346880	718466560	785328768	891336960
		glycerate	1572	LC/MS Polar	1052	2070.4	105.019	600-19-1	752	C00258	HMDB00139	48140796	36923356	31230714	26945404	35014036	43348576	52344084	42278604	50838744	16702194	33566276	25134106	35622764	43023752	49503676	47782200	30795184	8794170	33954072	34105520	40927916	27897392	27414624	39524092	35801556	50604936	17007580	32783954	48685896	42665276	29013402	33374136	42218048	46314196	32429384	25941532	19711688	27989092
		lactate	527	LC/MS Neg	482	681.6	89.0244	79-33-4	612	C00186	HMDB00190	341790656	243970608	257996624	309938336	299614176	636240192	368962496	439619648	216531216	237634960	412797984	332224224	238098576	348593504	224877296	343343200	349322848	362318048	267923824	171906240	184475536	259780864	372779840	328472032	406029888	342677792	499814368	198935136	271717536	346612000	272072000	386644800	230776976	270254240	350331072	378108512	480846496	223839120
		pyruvate	48990	LC/MS Polar	823	1083	87.0088	127-17-3	1060	C00022	HMDB00243	16301201	12459603	13251927	18015196	14297074	28195932	16033057	21200216	10409290	6.79505e+06	28009590	8707781	18619812	19018440	12709136	22154002	22419630	13818750	14595937	8343711	10878452	13013542	15673432	13870606	22013036	17095452	14238681	9723863	15394675	19212136	16187233	19915308	13457921	15795283	19072444	28267868	13886361	6285440
	Pentose Metabolism	arabinose	575	LC/MS Polar	828	1804.5	195.051	28697-53-2	66308	C00216	HMDB00646	137149	114321	ND	ND	140132	222770	ND	164599	106208	ND	ND	ND	145763	ND	115088	166976	ND	ND	ND	ND	79342	ND	98844	ND	93857	ND	ND	ND	88162	243934	ND	100087	ND	ND	186327	ND	48302	ND
		arabitol/xylitol	48885	LC/MS Polar	100006430	1932.4	151.061	-	-	-	-	2066133	1.60955e+06	2566880	1671547	1.91865e+06	1465960	1462206	2845983	1584787	3626315	1.60233e+06	1462708	2934845	1374372	1975076	1332956	2157839	2607904	2076646	2045850	2448287	2256725	1404373	2.05597e+06	1642532	1.62816e+06	3829611	3415404	2.00335e+06	1.98662e+06	1659036	3099301	1701747	2109588	1399248	2301744	2110225	1751456
		arabonate/xylonate	48255	LC/MS Polar	100006115	2664.6	165.04	-	-	-	-	15813666	12159043	15959002	10774796	9845313	11965121	8153798	23060916	12898013	17329038	17804384	7882538	14215585	11492029	18941494	12806930	8153216	5626460	14912368	14118099	15152952	8284769	18475392	16026576	8322414	8901192	16897614	8036997	10043127	15587634	9917055	16513303	7.48523e+06	13638254	13224594	12298071	12993797	10846683
		ribitol	15772	LC/MS Polar	100000406	1789.6	151.061	488-81-3	6912	C00474	HMDB00508	336743	208084	294615	268312	264294	320724	268874	285553	189332	179941	375454	212616	331558	236926	261721	251517	271018	166340	270195	141448	200281	233805	335283	266797	297130	220241	326432	166352	192950	262047	250608	446771	180387	169348	294244	360898	274047	265036
		ribonate	27731	LC/MS Polar	100001007	2425	165.04	5336-08-03	5460677	C01685	HMDB00867	26417200	21967592	20449332	20788826	25434042	24374304	18065984	34333312	20801544	13194830	25883236	19877084	25574112	21308260	28431820	26950474	21142190	11373554	32050872	20999800	22487920	19633838	25378072	27010016	19951012	19755490	23115904	16391659	14634020	17752508	19756360	26406498	18338904	18437906	23356620	21589018	18078904	25771368
		sedoheptulose	53237	LC/MS Polar	100002619	2255	209.067	3019-74-7	5459879	-	HMDB03219	ND	221765	ND	ND	ND	263433	304427	465376	ND	ND	445508	ND	398636	ND	ND	323485	318910	ND	228030	ND	ND	ND	ND	429666	ND	435455	286962	ND	ND	368967	ND	ND	ND	243648	326584	320106	ND	ND
		xylose	15581	LC/MS Polar	826	1727	195.051	609-06-3	135191	C00181	HMDB00098	139036	71493	257012	ND	ND	229709	57170	216859	172650	ND	ND	ND	171140	ND	135877	ND	ND	ND	ND	ND	148544	ND	189274	ND	ND	ND	ND	ND	57806	144166	ND	488086	73904	ND	132507	ND	ND	ND
Cofactors and Vitamins	Ascorbate and Aldarate Metabolism	ascorbate (Vitamin C)	32354	LC/MS Pos Early	233	770	177.039	134-03-2	-	C00072	HMDB00044	ND	ND	ND	ND	ND	ND	ND	ND	ND	3400365	ND	ND	ND	ND	ND	ND	ND	114748	ND	ND	ND	ND	ND	ND	ND	ND	1.52625e+06	ND	ND	ND	ND	ND	ND	ND	ND	ND	ND	ND
		gulonate*	46957	LC/MS Polar	100001586	2750	195.051	20246-53-1	9794176	-	HMDB03290	9701209	7677229	9496189	5880454	15020485	8656192	8050584	17725104	7851290	5184529	11633583	4655068	13431129	5002091	9733892	13347312	8216387	3.77652e+06	9983024	7513680	9550119	7.68409e+06	13215655	15392860	6977803	9131135	10181407	6666956	4926462	9902350	7808192	12301791	4518765	7.00661e+06	10001808	9654447	8.21147e+06	8066682
		oxalate (ethanedioate)	20694	LC/MS Neg	100000841	603	88.988	144-62-7	971	C00209	HMDB02329	18815086	23294496	16410917	16919000	20142168	21363766	26779232	25471046	28513270	5060727	19351254	15798577	18093088	24082086	19007366	24934492	11233394	ND	20242238	22307308	22378004	12007852	15639531	27980004	20437526	26571324	3.45555e+06	3486658	20795108	18174020	21110852	19024180	22569308	25647050	25095476	7393183	11047945	18219044
		threonate	27738	LC/MS Polar	100001022	2384	135.03	70753-61-6	151152	C01620	HMDB00943	16125443	82827120	71879888	46986160	68920640	71241272	55162728	45498324	73167208	140905040	43658484	62637900	31392708	19449694	13547073	62481028	65770040	32227036	29254532	64344232	85712240	43524600	14363868	73676440	94444000	139943040	81531504	65395184	110609344	52768680	73059016	24018548	58780688	8013910	79019736	80556000	13057105	20981608
	Hemoglobin and Porphyrin Metabolism	bilirubin (E,E)*	32586	LC/MS Neg	100001950	4294	583.256	114-25-0	5315454	-	-	12072595	4437586	9460441	9676499	10333096	10413693	7246674	12549625	10834932	6391994	13507380	11075767	6.25617e+06	5639108	5108938	17600188	5687728	5113255	9117399	7045156	4094286	4166137	2153239	8150099	10433500	6316422	12991104	7450849	3198236	9843087	12457152	4594275	7227095	4869658	14211176	6.33608e+06	4388009	17453644
		bilirubin (E,Z or Z,E)*	47886	LC/MS Pos Late	100001951	1270	585.271	-	5799469	-	-	610376	578960	700507	1421031	1529701	1886324	1067203	1092702	1587464	1898535	1.67589e+06	878842	794154	947118	429241	2331551	909979	697982	1435546	937147	921912	432347	ND	1262654	1658116	2233907	1615344	2418815	1283615	1455310	1409778	716634	1599431	1474986	3405506	762715	340522	1009618
		bilirubin (Z,Z)	43807	LC/MS Neg	1090	4796	583.256	635-65-4	5280352	C00486	HMDB00054	ND	866355	716942	2032617	2466361	3672176	1865308	1498304	4838292	3760028	3824259	1.00586e+06	723967	1961788	77233	5341019	1566487	560409	3920223	458857	1221347	183634	ND	1669887	2.02304e+06	2927374	1529643	1310326	1956723	1659388	1145388	773809	2569239	245471	10453473	1652876	454415	929914
		biliverdin	2137	LC/MS Pos Late	250	1016	583.255	55482-27-4;55482-27-4	5353439	C00500	HMDB01008	11736018	2596174	9573093	6248326	8.1948e+06	9239080	4477709	6571772	3965140	4117219	7464941	9634969	3.92973e+06	3772456	4719868	10497871	2807835	2206954	8029227	11683100	2813991	7372515	37000024	8086838	11267258	4430869	4950499	2722686	3232325	7376346	7.70733e+06	2368070	3982518	5676559	9898898	1914821	5.97087e+06	9084258
		heme	41754	LC/MS Pos Late	100001386	1124	616.176	14875-96-8	26945	C00032	HMDB03178	10142029	9782286	9262824	14288504	7888951	7240407	7.62871e+06	4381039	1.46285e+06	1507344	5059804	14329500	6626304	2.75668e+06	10794309	6834534	2205555	3.77278e+06	6427417	15912768	5153738	7.86801e+06	222679616	8731337	5198702	5.68418e+06	2404527	1623081	1.89813e+06	8740763	5008875	3756980	1927181	5497516	12468995	4012188	17940880	4285900
		I-urobilinogen	32426	LC/MS Neg	100001226	4190	591.319	14684-37-8	26818	C05790	HMDB04157	ND	ND	ND	ND	ND	996134	ND	109842	ND	58922	ND	ND	168210	33440	ND	655637	200115	44201	314832	ND	ND	ND	ND	ND	486334	ND	ND	ND	75001	ND	ND	141936	ND	ND	541983	26886	147486	135300
		L-urobilin	40173	LC/MS Pos Late	100002568	901	595.349	34217-90-8	5280818	C05793	HMDB04159	475033	ND	832912	191581	2337278	ND	ND	314623	ND	ND	601128	7233971	324850	ND	ND	ND	ND	ND	ND	630997	ND	774825	859912	3558832	ND	ND	ND	ND	ND	386614	4900196	274626	ND	ND	ND	ND	ND	ND
	Nicotinate and Nicotinamide Metabolism	1-methylnicotinamide	27665	LC/MS Pos Early	55	1940	137.071	1005-24-9	10129985	C02918	HMDB00699	3348511	3.6563e+06	249816512	6938642	12835523	3.57943e+06	8.35376e+06	9261910	8925130	2965492	2233518	6147370	23061640	6714928	9659934	7.19731e+06	3.70137e+06	11701860	6.19322e+06	5312819	3796301	160230304	7.94241e+06	7610163	7505081	12331401	8825697	8.25496e+06	5349868	6390640	4194784	13218119	6094890	8226707	7.61679e+06	3448430	10064196	3874602
		adenosine 5'-diphosphoribose (ADP-ribose)	558	LC/MS Neg	215	920	558.064	68414-18-6	192	C00301	HMDB01178	153875	224850	688139	62490	639956	87111	144916	110288	289744	ND	160589	109099	58303	62229	72590	201134	109381	ND	99323	124542	100648	190238	2200313	338380	152196	192166	ND	ND	301523	101634	109794	ND	28621	179845	178093	ND	52042	172211
		N1-Methyl-2-pyridone-5-carboxamide	40469	LC/MS Neg	100001468	1668	151.051	701-44-0	69698	C05842	HMDB04193	11691517	7832959	351830080	20378902	22846160	10918980	14238244	26641434	16157144	5365934	13761915	11676871	35572720	17074638	15658184	15068576	16141414	8408992	22449920	19405388	9864469	272442432	17716544	15807604	14857359	20352120	9211965	13297753	7708243	11790363	10785427	20815944	20224708	15654875	17233064	17097612	6934388	17832606
		N1-Methyl-4-pyridone-3-carboxamide	57584	LC/MS Pos Early	100001469	1260	153.066	769-49-3	440810	C05843	HMDB04194	23538054	13856844	622182464	43009712	53851392	23604804	31065778	60264424	36243276	13632620	26774982	18686664	63168292	33661856	33679680	29660028	33194176	19791418	42719768	46003000	17815044	522254464	40038496	39702524	26593536	44389676	14000891	41676744	16279526	27196320	16175410	39111140	29034144	33016220	35256744	34074480	14428026	35022676
		nicotinamide	594	LC/MS Pos Early	432	1942	123.055	98-92-0	936	C00153	HMDB01406	18195262	20163582	101472160	13252111	67272048	11025052	15869696	16162484	23528084	3354542	13835169	16777456	23619532	12291615	12824518	21211536	15158998	6.2857e+06	17709340	21612364	14676093	54323816	147018624	32636498	19898168	21922394	9931447	3659550	23326374	13547762	11409401	12725669	11028504	20983552	22183334	9930069	11598971	22612948
		nicotinurate	35121	LC/MS Neg	100001455	1467	179.046	583-08-4	68499	C05380	HMDB03269	ND	ND	16129158	ND	ND	ND	ND	ND	ND	ND	ND	ND	ND	ND	ND	ND	ND	ND	ND	ND	ND	5761002	ND	ND	ND	ND	ND	ND	ND	ND	ND	ND	ND	ND	ND	ND	ND	ND
		quinolinate	1899	LC/MS Polar	182	3000	166.015	89-00-9	1066	C03722	HMDB00232	1375955	1509849	758487	765387	1.61107e+06	507211	1471259	2466406	982457	178876	537421	1553728	1247656	721905	1054374	1370133	408651	108929	1265727	1832961	1110861	614731	798893	1912085	731588	1117878	435015	218276	247761	905046	1773861	1058868	774215	1432690	888459	289020	528251	2.03746e+06
		trigonelline (N'-methylnicotinate)	32401	LC/MS Pos Early	100001092	1388	138.055	535-83-1	5570	C01004	HMDB00875	53934444	11573175	188171808	21447112	50922944	314444032	36301332	107022688	124064768	11185158	30212356	12010938	86009936	13192118	148249872	15076766	13146972	16980964	186976128	34228088	47239576	155301008	28698396	65084264	5587272	62223632	63187668	199813392	18518408	45090484	21131648	35690824	37503136	146384752	17992224	37764476	41672128	92107048
	Pantothenate and CoA Metabolism	pantothenate	1508	LC/MS Neg	1024	1498.7	218.103	137-08-6	6613	C00864	HMDB00210	6413866	7796519	13050061	7981979	14481847	10892787	26222950	12693501	23163964	3598783	4684733	3842494	9997947	4217769	5325457	10113358	8302571	2350918	4528956	8631622	8145239	11529447	9072251	13886037	10713980	25420698	5435096	16209356	4798788	13097159	2994682	8746016	3460899	7513856	7999869	8576939	4485945	4601052
	Riboflavin Metabolism	flavin adenine dinucleotide (FAD)	2134	LC/MS Neg	327	2425	784.15	146-14-5;84366-81-4	643975	C00016	HMDB01248	68330	86734	89753	92463	194386	89184	74219	100349	148015	ND	87612	62021	113748	92467	92757	122441	68051	ND	67006	60344	63309	59482	219488	115684	89044	74541	ND	ND	78704	84891	75109	91522	109763	71901	143907	57289	73725	83379
	Tocopherol Metabolism	alpha-CEHC	48188	LC/MS Neg	100002206	4045	277.145	4072-32-6	9943542	-	HMDB01518	ND	102419	ND	ND	109328	275107	302596	179736	127603	ND	83487	ND	126489	204360	ND	219964	260836	ND	ND	ND	ND	ND	ND	ND	308767	505442	270518	ND	ND	124094	ND	ND	ND	ND	157507	151317	ND	ND
		alpha-CEHC glucuronide*	39346	LC/MS Neg	100003101	2616	453.177	477200-36-5	-	-	-	ND	ND	72373	30702	102338	282020	228889	394698	84497	ND	ND	ND	170094	21189	ND	85543	159333	ND	ND	188881	ND	97504	43850	66021	201478	306948	165750	ND	ND	65595	ND	48930	ND	ND	81142	99916	ND	ND
		alpha-CEHC sulfate	47666	LC/MS Neg	100005972	3090	357.101	-	-	-	-	ND	64238	154183	109868	120093	894504	250440	830420	88626	37705	60435	ND	324790	234523	ND	316002	456263	24431	ND	482696	32705	154882	135154	81032	626112	279564	247837	ND	ND	172857	ND	120454	59028	ND	228859	327036	39635	ND
		alpha-tocopherol	1561	LC/MS Pos Late	1105	2522	430.378	59-02-9;10191-41-0	14985	C02477	HMDB01893	519637376	553226816	429241376	562546560	663700096	793980672	804654720	671228160	590484032	398061824	505604704	357288576	445268448	440315392	539228736	748470464	505142368	441355488	460670912	488798944	445436608	427493568	430220416	731362432	647726208	774573184	632166848	493039488	503644832	662445440	352446240	507293568	437627872	556230528	762645824	621939200	480101568	469848704
		delta-tocopherol	33418	LC/MS Pos Late	100001216	2259	402.349	119-13-1	92094	C14151	HMDB02902	418068	418593	358553	232492	346145	1184401	319857	168116	121701	149362	504589	174505	136090	73085	296137	347511	299662	ND	118003	171132	182081	333947	ND	136480	529756	457797	171437	ND	ND	151394	252931	159983	70888	124882	282076	245418	538526	208362
		gamma-CEHC	44876	LC/MS Neg	100002094	3843	263.129	178167-75-4	133098	-	HMDB01931	767455	1343703	315865	480420	630347	2082168	1145637	1027767	1.03056e+06	445925	479102	716592	1333184	2391545	422324	930872	924203	1474063	970011	793474	460283	407590	456804	303276	1230972	1612490	438140	516277	591463	514533	404484	939726	481049	311209	607854	872195	1496521	425092
		gamma-CEHC glucuronide*	42381	LC/MS Neg	100004243	2500	439.161	-	-	-	-	65003	118193	26604	23705	66837	225485	70533	172067	108699	ND	60862	37541	300071	81117	66723	63533	109527	92752	115168	115402	25266	ND	23703	27097	129124	149184	55221	ND	28415	27804	29989	213010	22844	ND	64028	103222	145730	32333
		gamma-tocopherol/beta-tocopherol	52473	LC/MS Pos Late	100008998	2384	416.364	-	-	-	-	26741044	30866012	12956048	14642898	12385330	26369636	15078822	10446057	8052715	11529707	20326240	14952065	8476720	10780844	19650650	16505294	12988188	20658514	8844416	14129015	15975761	13533425	8245193	15231793	12025189	11490244	13955112	6662062	16175898	8690680	17351532	15945148	8870463	17353132	18045624	19375102	32034040	14186890
	Vitamin A Metabolism	retinol (Vitamin A)	1806	LC/MS Pos Late	498	1636	269.226	68-26-8	445354	C00473	HMDB00305	41414500	43663600	36130104	55094224	56575608	68624064	41688664	55988448	51373508	44199556	51511844	43683712	59087080	36876008	46895596	56660128	51495076	31671740	38484660	48411668	41189880	38888776	42540332	58498612	65876648	47088344	61632488	44010296	53782000	73778248	34444640	52679372	45758108	49264700	57702960	52287560	41646816	26876620
	Vitamin B6 Metabolism	pyridoxal	1651	LC/MS Pos Early	491	2343	168.066	65-22-5	1050	C00250	HMDB01545	68871	193621	869528	1042035	535376	803904	1264827	569430	1336948	ND	156044	313240	1550997	2112542	350632	716306	563065	ND	337394	431401	284874	551597	863220	517930	636520	1712142	ND	2539425	ND	648385	305457	280093	3438510	242661	718053	ND	476990	309400
		pyridoxate	31555	LC/MS Neg	100001121	2185	182.046	82-82-6	6723	C00847	HMDB00017	3.6041e+06	3112445	6647523	9553802	7842797	5974187	14064367	13962967	11996007	3266348	3136875	3062641	7394174	22754332	3268406	9814554	9464944	1268561	3022810	7.47773e+06	4.15267e+06	6014303	7985121	8091192	4471880	18301452	4698308	15190173	3157460	5821351	2634781	5460219	29682008	4933588	7.65203e+06	10234254	3266523	1.93766e+06
Energy	Oxidative Phosphorylation	phosphate	42109	LC/MS Pos Early	461	576	98.9842	7664-38-2	1061	C00009	HMDB01429	36265984	32409342	28889208	36514616	29080092	28446064	28143760	28895198	46005284	24459834	22103232	37472908	35833508	48772308	34110960	23478728	34171096	16021960	36886336	30926312	39610884	25433338	37498032	30037674	36397516	26544256	29463796	33024920	28388586	22307188	42600664	26689046	50589760	29999916	24053504	33772156	26971936	35183796
	TCA Cycle	2-methylcitrate	37483	LC/MS Polar	90	4565.3	205.035	6061-96-7	439681	C02225	HMDB00379	ND	ND	ND	ND	ND	ND	ND	ND	ND	2311987	ND	ND	ND	ND	ND	ND	ND	2070162	ND	ND	ND	ND	ND	ND	ND	ND	2294357	1.65602e+06	226984	ND	ND	ND	ND	ND	ND	832605	ND	ND
		alpha-ketoglutarate	528	LC/MS Polar	93	2700	145.014	305-72-6;328-50-7;22202-68-2	51	C00026	HMDB00208	12337378	13466931	25528506	18431618	18725430	29922116	14354917	21869044	10185394	5477263	16996394	20712352	20180484	14871105	14005405	19268924	19927330	7971029	24787232	12693311	12524401	21323380	10565390	20559672	23924848	14462677	11858743	8851598	6676477	15602025	27619346	17618448	17193444	13437717	22614684	20187736	12427708	21117408
		citrate	1564	LC/MS Neg	1124	582	191.02	77-92-9	311	C00158	HMDB00094	560917824	587693376	592476608	479105248	575349632	598768640	593486528	581201088	555540032	16385504256	363118176	645550784	659494592	487839552	607389952	469870592	8181416448	17119403008	450181280	580827840	581384576	530066944	461121504	559419456	617973504	484121024	15961563136	15797943296	10012286976	453349632	753439744	653973056	510048192	574438336	417186880	13104757760	418721248	438891392
		fumarate	1643	LC/MS Polar	330	3084	115.004	100-17-8	444972	C00122	HMDB00134	857652	687455	953147	568678	1113257	1054764	701982	1106707	666689	779554	845759	735335	579650	733033	709542	947721	3543970	4321591	779377	646405	515687	749731	1395780	713933	977054	1.01499e+06	4987147	1.02291e+06	4235898	768515	1118341	828223	820984	691078	961416	4215770	748099	677745
		malate	1303	LC/MS Polar	409	3343.1	133.014	6915-15-7	525	C00149	HMDB00156	87074200	66894180	84034880	46050884	128461544	108059184	71527096	105857080	53660364	36885644	71019672	56859812	48580888	67828448	56553424	90098744	55551936	39310780	71593104	50886940	37230640	55401904	143016336	123144704	80043040	69744040	60480672	41868608	48751844	80031128	64503012	79796312	49487440	86744344	98628664	54551960	73812576	75585168
		succinate	1437	LC/MS Polar	252	3149	117.019	110-15-6	1110	C00042	HMDB00254	33109608	16454103	23505002	15335414	29622898	20245688	14115627	19760112	22718612	8652937	26912862	18805680	22578020	23539416	17276618	20182124	8092954	5360493	13946780	17357900	13663293	16702295	21429566	19879232	20274374	21204208	8791404	7912947	9961323	19902296	19153236	27979598	20472192	24323846	15244696	7.0564e+06	20956902	17951932
		succinylcarnitine (C4-DC)	37058	LC/MS Pos Early	100001948	2291	262.129	256928-74-2	-	-	-	2123045	1331526	1290133	1329665	2193732	1649672	1.50042e+06	1704661	1353088	1648980	2.04941e+06	1934433	1247999	947660	1427869	2.07992e+06	1.76833e+06	1.00005e+06	1.52674e+06	1901320	1270277	1635734	7.09509e+06	2200619	1691108	1381635	1580168	1386460	1866922	1815260	2222445	987617	937098	1371129	2121223	1.70536e+06	1354536	1296425
Lipid	Carnitine Metabolism	carnitine	15500	LC/MS Pos Early	100000007	1978	162.112	461-05-2	10917	C00318	HMDB00062	1923758720	1242848384	1624026240	2006300672	1717159296	2042982784	1936153472	1983044352	1609541376	1198848896	2050746624	2071379840	1606425472	1811869184	2157735424	2041898752	2160889856	1691564928	2027775872	2170969600	1192429056	2001790848	1835194880	1809472256	1990118144	2045874176	1751241344	1359025536	1521313152	2018442496	1972309504	1476280064	1967805312	2086781312	1975505280	2035234048	1879214464	2057878144
		deoxycarnitine	36747	LC/MS Pos Early	100001662	2052	146.118	6249-56-5	134	C01181	HMDB01161	57426016	49652684	68773976	59829088	82873408	48256332	70448200	85566864	59055848	46510848	68211312	64257684	57229456	82199576	74389168	71261848	53130796	48752808	50911132	75188656	46850456	78027296	98456352	70016600	45873112	77757376	63334536	40735724	65780036	65823560	61417740	50920756	80386968	66535044	63063748	42186972	69002072	61013144
	Ceramides	ceramide (d18:1/14:0, d16:1/16:0)*	57432	LC/MS Pos Late	100015735	2477	510.488	-	-	-	-	2273720	2723483	2626340	4303215	3.0401e+06	1913743	2167876	2823488	3.3264e+06	1544269	1965637	3158646	3829370	1.99879e+06	2921396	3594563	2450235	1.42105e+06	4244810	2304878	4040029	2462613	3312888	2607269	2230393	3124373	2659722	3304016	1923444	1924306	3336505	2616895	3376488	3117879	4019609	2323946	1590829	4754841
		ceramide (d18:1/17:0, d17:1/18:0)*	57434	LC/MS Pos Late	100015737	3055	552.535	-	-	-	-	888377	1118109	856594	950189	898656	633653	484567	857909	1094524	429719	728166	545390	616150	506165	612493	1271660	822100	203894	970503	638548	752883	789410	1155438	862935	831950	721235	900611	764150	817585	520140	683158	873467	897032	619224	1296913	964451	315439	1308570
		ceramide (d18:1/20:0, d16:1/22:0, d20:1/18:0)*	57440	LC/MS Pos Late	100015755	3920	594.582	-	-	-	-	21461258	17363626	15543298	24569144	20684434	11847934	17954560	24839880	30670224	12240031	11817550	15198016	23296844	11805646	20871586	23689048	15490703	9145519	27236268	24314446	19491032	15571605	27155228	21467570	22804460	21520960	21186928	20366242	19709648	8743331	14864559	15754409	13613564	19922860	21187548	17741224	12432602	29501868
		ceramide (d18:2/24:1, d18:1/24:2)*	57443	LC/MS Pos Late	100015744	3858	646.613	-	-	-	-	26822500	26417328	19417578	35497864	17113978	9072106	17325224	29369504	39450264	23520536	15233671	17734358	26188928	18895288	32955030	26146188	16373910	15859816	35041376	21998830	33181484	23921210	54012172	27341480	17848772	24443884	28581640	31587120	25035500	14809915	19041308	23016640	24523310	27448172	24298576	18647648	23686078	46969760
		glycosyl ceramide (d18:1/20:0, d16:1/22:0)*	57595	LC/MS Pos Late	100015882	3414	756.635	-	-	-	-	2094753	1619620	1.00807e+06	2526813	1.85512e+06	1768410	1071704	1633371	3.67738e+06	1.72002e+06	1520355	2731829	2288279	2061829	2117326	2253784	1540521	795551	1.84823e+06	1720161	1635241	1.02577e+06	2491663	2.01568e+06	1.77805e+06	1401069	1302327	2812629	1.71278e+06	1552887	2406379	1368150	2109974	1993284	1969468	1.76009e+06	1265023	1924163
		glycosyl ceramide (d18:2/24:1, d18:1/24:2)*	57453	LC/MS Pos Late	100015745	3380	808.666	-	-	-	-	2068804	1498377	1228105	1804398	1145449	1080967	836109	1242912	3.32075e+06	1.68183e+06	1361798	2234926	2200692	2467365	2773386	1287234	1183328	659282	2018630	920014	1864498	1078162	1794773	1321313	783165	1402694	1043271	2795799	1552694	1758649	1975106	1739985	2474640	2434184	1128572	1106414	1416437	2234541
	Diacylglycerol	diacylglycerol (12:0/18:1, 14:0/16:1, 16:0/14:1) [1]*	55002	LC/MS Pos Late	100010958	2636	556.494	-	-	-	-	ND	ND	ND	354976	ND	234611	ND	233911	ND	ND	ND	ND	395274	ND	ND	635313	149654	ND	243812	ND	ND	ND	1093867	270454	284859	ND	416168	ND	ND	ND	ND	625446	ND	ND	1004095	344857	ND	ND
		diacylglycerol (12:0/18:1, 14:0/16:1, 16:0/14:1) [2]*	55001	LC/MS Pos Late	100010959	2716	556.494	-	-	-	-	564554	308468	ND	1.64694e+06	574652	2256432	560922	1.78898e+06	ND	296266	451663	144299	2221239	137182	109242	3273162	983907	273308	1453796	238809	517786	ND	3963459	1748187	1.72804e+06	232654	2596014	365328	290737	592716	92587	2882989	368587	435566	5508331	2271212	535447	342225
		diacylglycerol (14:0/18:1, 16:0/16:1) [1]*	54953	LC/MS Pos Late	100010934	3057	584.525	-	-	-	-	1747093	1081756	399763	5569781	2026198	3214185	1.42879e+06	5130913	786113	941526	745511	483785	3.00158e+06	602632	582574	10020996	1873235	960201	2892646	1114155	1022459	403641	10431871	5288500	2532526	910004	6355134	765637	1295990	1757400	373966	5135499	1396470	1376340	11743739	4710448	1816278	1385733
		diacylglycerol (14:0/18:1, 16:0/16:1) [2]*	54954	LC/MS Pos Late	100010935	3183	584.525	-	-	-	-	2101697	1378678	703619	7851344	3457424	4789135	1700677	6018300	1365905	1348435	1130099	876523	4867106	831721	934193	13261860	2701650	1277882	4750260	1709425	1805342	557921	15595889	7049293	4181675	1310424	7871821	1353412	1451627	3456001	669837	6862220	1936703	2264142	15134883	5206298	2187354	2170000
		diacylglycerol (16:1/18:2 [2], 16:0/18:3 [1])*	54966	LC/MS Pos Late	100010940	2733	608.525	-	-	-	-	7749593	7887105	4339309	26854768	13668981	13747422	9968148	19758854	5175816	4032669	4449912	4220102	12179590	3719037	4866181	27803220	7.72036e+06	4131240	7116789	7510815	5382782	3158140	36151524	18383834	9764252	10153279	27922418	7138618	2994672	11556789	2402138	26936192	9049669	9041865	31977422	17210728	9331269	7772316
		linoleoyl-arachidonoyl-glycerol (18:2/20:4) [1]*	54955	LC/MS Pos Late	100010922	2566	658.541	-	-	-	-	7719910	7.99864e+06	7.06808e+06	14457593	12855033	13505294	13401831	8882236	4101787	4559386	7042280	4872890	11584811	3.31017e+06	5452909	10743212	6706644	3452946	5494664	9616070	5705501	5489929	17490728	13081366	12125711	12100673	11033808	6386168	2826977	5201267	4.09433e+06	18941656	5100766	7.18367e+06	10134048	8443284	10782632	4949564
		linoleoyl-arachidonoyl-glycerol (18:2/20:4) [2]*	54956	LC/MS Pos Late	100010923	2624	658.541	-	-	-	-	12057012	9341683	8205937	16905602	13457918	19537052	13726942	7685917	5785236	6648744	6150910	4907029	10220200	7502531	6.88719e+06	13716677	7.12364e+06	3622535	5231897	10096883	4496649	6021628	20431000	19014672	12819855	10416623	12713435	6811677	6028815	5088376	3263372	23720140	6020622	9122870	12867580	12576607	10792109	4276768
		linoleoyl-docosahexaenoyl-glycerol (18:2/22:6) [2]*	54950	LC/MS Pos Late	100010929	2468	682.541	-	-	-	-	6815649	5.14621e+06	4326583	7713787	6992898	13544556	4594744	6036961	4835237	2182282	3309459	ND	3306188	9273994	2901036	4995554	1599746	842919	1053594	3100130	2113221	2061145	10576313	11024183	12307793	5.30676e+06	8332161	3432167	2668812	7.88582e+06	924329	8357141	3.91918e+06	5077979	7156485	5017746	1665832	1206276
		linoleoyl-linolenoyl-glycerol (18:2/18:3) [1]*	54963	LC/MS Pos Late	100010926	2426	632.525	-	-	-	-	1.0505e+06	2.92819e+06	1220317	6008596	4427187	4611887	4497420	3.22565e+06	1.48296e+06	ND	1384769	602689	1126548	1756073	1.77716e+06	3.26156e+06	1492445	640506	1005766	1821312	1410620	1126167	1890178	4667497	2647002	9703195	3781425	2195527	466138	1.61998e+06	599511	ND	3.82445e+06	3.10958e+06	3.04348e+06	3.87925e+06	2.83196e+06	1755465
		linoleoyl-linolenoyl-glycerol (18:2/18:3) [2]*	54964	LC/MS Pos Late	100010927	2478	632.525	-	-	-	-	7.34016e+06	8983876	2420426	7.48086e+06	7987054	8490781	11510060	7354788	5370874	6.86135e+06	2734707	2021681	2647782	3250010	6449593	11807180	3697781	2732074	2615180	5048123	3622426	2421950	11719085	11595721	5990529	13825028	10024798	4705254	3997557	4.44461e+06	1565128	6045158	4855481	11457786	10023329	9078920	11076786	3403159
		linoleoyl-linoleoyl-glycerol (18:2/18:2) [1]*	54968	LC/MS Pos Late	100010941	2689	634.541	-	-	-	-	30999320	52192260	24231820	68264624	77381056	60877496	93920824	45376872	19251634	24958220	24769324	16764154	17905150	26745362	25106168	59453212	29869260	18199526	16223864	45404088	25722892	22403404	45896272	64630968	63507300	106272208	74857384	26782032	15802737	36479992	12597611	37004104	41753552	32230392	63382668	50360072	48618312	26240866
		oleoyl-arachidonoyl-glycerol (18:1/20:4) [1]*	54960	LC/MS Pos Late	100010936	2907	660.556	-	-	-	-	18316776	11841663	9704490	21552272	13772128	15023559	15551964	16853934	9151795	8560632	10466777	7801756	23688636	6809731	8218924	23202088	7267845	7384471	8517495	12732799	8012069	9683539	29181206	21071864	11078775	10089183	13942249	8165260	8489431	11184567	6709187	37570884	8318072	10494548	20447228	11746274	14309290	6645713
		oleoyl-arachidonoyl-glycerol (18:1/20:4) [2]*	54961	LC/MS Pos Late	100010937	2990	660.556	-	-	-	-	13807915	9430251	8104047	18235448	12989847	14067904	12788627	15471222	6967538	6731899	8717411	6373477	16874012	4877268	6238719	17921612	6075587	5994019	6780650	11298354	6700968	6580547	25776788	17717088	9492032	10555420	12698768	6666715	6837998	9397331	5683383	30953960	6290387	8.30236e+06	17603516	11200418	10367846	6188275
		oleoyl-linolenoyl-glycerol (18:1/18:3) [2]*	54970	LC/MS Pos Late	100010944	2819	634.541	-	-	-	-	3.42849e+06	1657315	2702494	8717387	3499657	1889679	687439	3.57657e+06	1222780	2735543	2941033	2077153	4480642	880352	1656594	ND	3151663	ND	1337351	2821146	2499644	2100154	4376279	2024454	2575820	5057260	3743737	3242429	ND	1596476	1555646	4378456	4.05868e+06	1835763	6131330	3.79655e+06	1562331	3215870
		oleoyl-linoleoyl-glycerol (18:1/18:2) [1]	46798	LC/MS Pos Late	100002989	3115	636.556	106292-55-1	-	-	-	70947704	67701320	37779688	117666184	98380584	74726336	111227264	93324288	38246528	41127880	35536040	27139092	41917840	51066124	40651040	136178256	39683048	32408864	33940624	69479352	37535188	35349452	112710632	113627848	68342576	109423048	107995064	32379294	41908288	78950392	20439964	76198800	61922692	59696384	126422080	70201248	63845040	51942332
		oleoyl-linoleoyl-glycerol (18:1/18:2) [2]	46799	LC/MS Pos Late	100002990	3223	636.556	104346-53-4	-	-	-	76508440	73183216	36757336	125080592	106952080	83140464	104542888	93389560	38434116	37930748	39055064	29539072	48865056	45999236	47219572	146651360	42811660	32583332	28397648	79488672	38917112	31564326	148348544	124730760	78571432	120874968	119099048	37091632	38761360	92306520	21421672	85645808	62709744	63319124	136252048	75219904	63656004	52013528
		oleoyl-oleoyl-glycerol (18:1/18:1) [1]*	54945	LC/MS Pos Late	100010918	3571	638.572	-	-	-	-	49049856	29340708	25907340	71841040	50967168	34203536	44295996	65266772	18707756	29956454	22564552	17304904	36794520	27052734	21164012	94741688	26572524	25169254	29785534	50632740	22478316	20877902	77182256	65164632	38713036	47022920	64747608	16579875	35849888	52276104	13381114	46449124	38455300	32118766	87354856	41902216	32844044	37677756
		oleoyl-oleoyl-glycerol (18:1/18:1) [2]*	54946	LC/MS Pos Late	100010919	3695	638.572	-	-	-	-	56763576	33048784	32805342	88411008	58111464	39281028	47039324	71552624	25917172	35666944	23564816	19364096	44178840	35607416	28374674	106025216	28387092	28846898	35604084	55670772	25396064	26001444	106712256	75068352	45008796	55139032	77886728	22634712	42707796	58263084	15367334	62267076	51033576	38065008	102091264	48070484	46435552	47102128
		palmitoleoyl-arachidonoyl-glycerol (16:1/20:4) [2]*	57406	LC/MS Pos Late	100015681	2528	632.525	-	-	-	-	4.1621e+06	2925704	1235056	3713124	1795215	2840724	8552459	2900038	2560512	4184029	1446145	1018230	2904821	453989	2598857	4214433	1601783	2784170	1221641	2432007	984626	1.25557e+06	7814622	2910531	2244824	5548479	2.85406e+06	1836910	2710614	2870719	865315	8599600	ND	ND	3.18112e+06	4741900	6640414	1097157
		palmitoleoyl-linoleoyl-glycerol (16:1/18:2) [1]*	54967	LC/MS Pos Late	100010930	2664	608.525	-	-	-	-	4005074	2516745	2316719	13712248	5528299	4948380	4512185	8823240	1587169	3036964	1.80248e+06	1.87406e+06	4685186	1394265	1675559	11975199	4307582	2303207	2401028	5188827	2066508	1843844	14444042	7.71374e+06	5479923	4.01041e+06	15164270	2821683	1661079	3453329	848549	11485891	3875479	3478604	12777077	7.7518e+06	4527898	3182294
		palmitoleoyl-oleoyl-glycerol (16:1/18:1) [1]*	52632	LC/MS Pos Late	100009053	3035	610.541	-	9543694	-	HMDB07131	5626696	2.0249e+06	2393129	19508076	3431044	3.1866e+06	2.29995e+06	11369256	1.63908e+06	3.13721e+06	1833619	2021140	9112800	1.8313e+06	1.36678e+06	18946752	4210245	1.84657e+06	3880768	4278020	2058458	2436210	17603836	5.48392e+06	4318941	ND	12799145	2688434	1.77534e+06	4.04524e+06	1009339	15411435	4770776	3.06387e+06	21217172	6.18799e+06	3.42822e+06	4682547
		palmitoleoyl-oleoyl-glycerol (16:1/18:1) [2]*	52631	LC/MS Pos Late	100009054	3154	610.541	-	-	-	-	6879178	3.10674e+06	2417109	10451436	8474812	6.90907e+06	3.10004e+06	13831978	2054848	3296361	983364	1373987	6610311	2.04381e+06	2.40909e+06	22899522	6.78739e+06	2.77388e+06	5514072	2939294	1105458	1937340	12131494	8792819	6.13446e+06	3726348	18156516	1467313	2594850	7618972	1.93238e+06	27058286	1402026	4659290	22222636	6.05242e+06	2.25637e+06	1372637
		palmitoyl-arachidonoyl-glycerol (16:0/20:4) [1]*	54957	LC/MS Pos Late	100010924	2916	634.541	-	-	-	-	ND	ND	2733368	7635237	3186194	4777202	ND	3023229	4473638	ND	1408639	2894557	9942464	ND	ND	1063955	2257819	ND	3314476	ND	882009	2505574	16612355	1.74104e+06	3372919	445254	ND	1009068	ND	742541	2742224	14190694	1630300	2472961	3413558	6621708	2.89592e+06	1.81911e+06
		palmitoyl-arachidonoyl-glycerol (16:0/20:4) [2]*	54958	LC/MS Pos Late	100010925	3015	634.541	-	-	-	-	1830557	745894	1397418	5155195	3906554	4885111	2203938	942161	1252019	860565	1282259	1362508	5256811	350694	1.01242e+06	5696064	1.62587e+06	1280669	3.32452e+06	1.83641e+06	1230716	966761	8384746	2355782	3000122	1389380	896809	1490802	978907	1427100	1572552	8916980	1544220	1676979	6296999	4394784	2658177	1293670
		palmitoyl-linolenoyl-glycerol (16:0/18:3) [2]*	54965	LC/MS Pos Late	100010939	2834	608.525	-	-	-	-	1127433	582845	565929	2918126	2272944	2679746	1398294	1083528	275123	414212	459359	711570	1229827	ND	324807	1719813	1258056	ND	1172923	728717	638496	276303	2257840	3702896	1436255	2330331	3377351	775886	350752	600457	332608	1315120	1352704	563907	2142112	1273815	1704128	795941
		palmitoyl-linoleoyl-glycerol (16:0/18:2) [1]*	52633	LC/MS Pos Late	100009052	3080	610.541	-	9543695	-	HMDB05207,HMDB07103	9168277	12582603	1623380	9920289	25175456	27381894	19835372	25169628	8520744	6.47763e+06	3516695	2317956	2284927	6.30834e+06	7459626	36308344	10768432	7.25248e+06	14066277	4782982	3016341	1619234	7.80971e+06	37794820	19245284	12157044	30503584	3286646	6.49946e+06	13815110	4274508	16572975	3.49714e+06	11735992	38325640	29199752	17826042	5293199
		palmitoyl-linoleoyl-glycerol (16:0/18:2) [2]*	52634	LC/MS Pos Late	100009055	3197	610.541	-	-	-	-	11761030	13058077	5879119	30568988	28976662	24338014	16306250	28104868	8847685	8551892	6.72778e+06	5962829	11860442	7100209	8517724	51490516	11916196	5.96064e+06	16826420	12500160	7.83809e+06	4555641	47933192	33821916	25186154	19819416	39337664	8.10381e+06	6890948	18817994	4668995	22430956	9844616	15027793	54136008	25001054	14751647	10418463
		palmitoyl-myristoyl-glycerol (16:0/14:0) [2]	57364	LC/MS Pos Late	100015610	3180	558.509	-	-	-	-	67712	ND	ND	357468	223623	435759	ND	312728	ND	ND	ND	ND	322530	ND	ND	1001998	213660	47376	711076	ND	105449	ND	1091624	614023	337947	ND	428994	ND	48265	176467	ND	296639	ND	114909	1504816	420301	146350	52407
		palmitoyl-oleoyl-glycerol (16:0/18:1) [1]*	54943	LC/MS Pos Late	100010916	3562	612.556	-	-	-	-	9100018	6858734	5473682	23803330	17139968	14245998	9720683	23635256	5.22312e+06	7134544	4.52769e+06	4188030	12272029	4972552	5455600	37452580	10949093	6765633	14016094	10162999	4961323	4179174	34214764	24992470	15032449	9901312	26192844	4891536	8093056	12117680	4201255	16884128	8023330	9219403	39181820	18545856	9468779	10437153
		palmitoyl-oleoyl-glycerol (16:0/18:1) [2]*	54942	LC/MS Pos Late	100010917	3695	612.556	-	-	-	-	12320102	8654421	8501089	31781282	21877452	16919388	11166844	27957004	8850668	10559327	5259345	5761859	17707080	7156847	8.3833e+06	44263960	12769997	8989182	19555270	12929743	7.09721e+06	6067214	46988380	31643370	18995246	13279140	34346328	7480384	11087754	14973815	5438345	24765656	12721566	12709600	46928200	22870212	14593498	15356595
		palmitoyl-palmitoyl-glycerol (16:0/16:0) [1]*	54991	LC/MS Pos Late	100010947	3568	586.541	-	-	-	-	ND	ND	ND	1331615	999110	1047754	ND	1282809	ND	ND	ND	ND	468057	ND	ND	2672225	583289	ND	1575580	264075	ND	ND	2657989	1662821	951169	217371	1578226	132652	ND	452037	ND	1100685	134782	ND	3363900	1404491	414896	355847
		palmitoyl-palmitoyl-glycerol (16:0/16:0) [2]*	54990	LC/MS Pos Late	100010948	3734	586.541	-	-	-	-	549980	405420	385979	2725524	1.73953e+06	1493913	556582	2035506	634705	556284	188262	277366	1.58985e+06	249509	426916	3818379	1167902	542918	2713423	644690	422420	263935	4738742	2808630	1706679	574214	2795424	517701	496088	736037	340974	2079058	712367	945974	4664547	2299208	1173598	1125114
	Eicosanoid	12-HETE	37536	LC/MS Neg	100002167	5326	319.228	71030-37-0;73837-14-6	5312983	-	HMDB06111	778937	654355	404354	413505	1408750	171589	194377	294793	934422	285518	163079	894176	759546	928453	355683	505794	456638	ND	251405	198431	375164	668062	985250	641668	501113	441774	360095	242033	374797	ND	783385	218952	476279	693321	288619	525834	ND	764321
	Endocannabinoid	arachidonoyl ethanolamide	32463	LC/MS Pos Late	1488	1535	348.29	94421-68-8	5281969	C11695	HMDB04080	312924	199351	209148	262134	215194	258321	230002	204425	157197	126446	184189	294364	233200	159934	254591	221491	230091	141852	156796	187477	208525	260328	314308	231637	233210	222012	181532	127548	113174	226051	272366	138738	129522	272897	262835	231233	145886	403719
		linoleoyl ethanolamide	52608	LC/MS Neg	100006726	6150	322.275	68171-52-8	5283446	-	HMDB12252	597350	388539	504731	496160	428338	405977	460851	456104	373879	115797	209445	907388	260397	418825	533964	336577	699519	234946	649087	232603	329655	483597	637929	389378	619070	320783	486645	278733	222592	489810	704795	544486	346323	907461	397267	874396	314197	1194950
		N-oleoyltaurine	39732	LC/MS Neg	100003119	5610	388.253	52514-04-2	6437033	-	-	3374047	1129517	3.47142e+06	2326896	2912333	2054144	1319609	476527	2015155	693643	1758633	3699618	1057503	1475882	1388017	1663832	3483535	413945	644189	532964	571830	2659652	2118353	2327226	1047007	546328	3032912	1869850	740183	966580	5761637	3496621	500881	2538666	1922818	1921173	274457	1449852
		N-palmitoyltaurine	39835	LC/MS Neg	100003239	5560	362.237	83982-06-3	-	-	-	2140026	732882	2142382	1.87717e+06	3076805	2.05065e+06	938160	511152	1488526	626829	1586970	2366560	1052340	537092	887298	1146516	2609502	196283	864280	618938	806309	1596284	1.7677e+06	1484660	1211285	630938	1467743	1119433	394271	648900	3310352	2365860	752579	2054514	1648198	1265008	279229	878633
		N-stearoyltaurine	39730	LC/MS Neg	100003240	5782	390.268	63155-80-6	168274	-	-	181049	211197	136300	118973	608629	325673	180088	152230	315549	ND	195100	324578	243783	ND	ND	512935	212625	ND	101832	72869	ND	124821	291430	285882	267008	108827	159182	121720	100811	399977	330919	374693	107009	308431	465088	163871	ND	225044
		oleoyl ethanolamide	38102	LC/MS Neg	1137	6450	324.291	11-58-0;111-58-0	5283454	-	HMDB02088	1994417	1347441	2128438	1793934	1.71459e+06	857369	1276946	1673022	1288071	887352	694691	2664243	1310796	1385802	1357690	1486302	2437028	850828	1047991	1161751	1018664	1.87354e+06	2129160	1390951	1458198	1015419	2242958	1375501	839928	1488611	2370785	2186784	1602540	2137989	2006764	2367837	882744	2935824
		palmitoyl ethanolamide	38165	LC/MS Neg	1489	6300	298.275	544-31-0	4671	C16512	HMDB02100	1.84081e+06	1650244	1827825	2260528	2052641	1306261	1.8267e+06	2137096	1.7887e+06	1197702	862031	2682260	1686910	1545830	1545982	2214762	2744352	1099117	1669875	1213727	1408078	1728392	2486788	2.00196e+06	1894266	1573190	2640327	1671473	1212544	1.63728e+06	2289764	2625156	1.78591e+06	2634019	2799941	3053482	1390301	2897498
		stearoyl ethanolamide	38625	LC/MS Pos Late	100002254	1787	328.321	111-57-9	27902	-	HMDB13078	1.04025e+06	828316	892766	1103844	1199651	1152550	614817	914244	874440	423124	630836	1327532	1248305	925344	1075571	1392928	1157711	378124	633022	529739	846807	740505	1623824	1153151	1213231	688079	1082449	860318	439748	974553	1143982	521705	1376457	913108	1358344	1318170	358097	1243210
	Fatty Acid Metabolism (Acyl Choline)	linoleoylcholine*	57463	LC/MS Pos Late	100015760	1388	366.337	-	-	-	-	2352811	1.96077e+06	558938	1294286	777944	3076463	2937934	637489	7455540	1471238	1.55439e+06	2106781	9934664	1685136	4496588	2356728	2296567	808967	10182252	409444	4365209	3774950	244357	3516529	3151533	4934811	132994	6.89282e+06	1433993	1283039	486778	1927769	1.27934e+06	4.0819e+06	921918	842027	2315665	3735435
		oleoylcholine	53260	LC/MS Pos Late	100009331	1449	368.352	-	-	-	-	1898799	982082	361599	673246	437858	1292766	1229011	464328	3570532	1144358	1220837	1286025	6.98799e+06	815287	1920796	1566434	1095562	587047	5568509	295461	2102611	2316757	181615	2082708	1271522	2177018	95078	3849672	954580	760734	252319	1290590	598184	2123189	589805	516407	1198783	1876171
		palmitoylcholine	52944	LC/MS Pos Late	100009233	1482	342.337	-	151731	-	-	3327150	1909089	814224	1510793	905218	3163786	2596030	820235	7042764	2117172	2422186	2.4035e+06	13228798	1732302	4062348	2426923	2625272	1000583	10086813	551970	4258215	4565906	268655	4216940	3345110	4182726	236700	8084079	1568664	1277788	556893	2486402	1159482	4473758	1052851	1144723	2131492	3501537
		stearoylcholine*	57464	LC/MS Pos Late	100015759	1520	370.368	-	-	-	-	1.73555e+06	1224741	284398	610539	445768	1559675	1388980	228256	3961698	957844	1047711	1132793	6336015	798513	2469354	1204583	1347726	445031	5553784	ND	2565406	2494752	ND	2262303	1555501	2520336	ND	4792960	821590	530242	168583	1210334	545185	2452059	379733	513348	1029223	1600312
	Fatty Acid Metabolism (Acyl Glutamine)	hexanoylglutamine	54907	LC/MS Neg	100001733	2780	243.135	-	-	-	-	620466	232571	2546221	648089	562054	327136	120116	417190	184074	86549	249488	572397	347338	583929	204666	508155	418303	82762	196739	450178	192229	722131	638707	416708	527506	220456	281335	207556	63136	191138	1237383	319884	519525	159883	734593	438672	147623	464385
	Fatty Acid Metabolism (also BCAA Metabolism)	butyrylcarnitine (C4)	32412	LC/MS Pos Early	100001054	2860	232.154	25576-40-3	439829	C02862	HMDB02013	15681043	4271228	17188180	13511151	11537300	16530389	11711737	18092076	7044623	10134388	17024408	29581200	9777996	15220913	12158123	9578121	12312501	3884986	17626628	11611310	4837906	14436397	14045880	9510575	15280341	13045071	12493439	5780414	10097857	8119110	32177772	10699504	15999417	11134962	9501968	13058602	7673093	20374180
		propionylcarnitine (C3)	32452	LC/MS Pos Early	100001162	2590	218.139	17298-37-2	107738	C03017	HMDB00824	47373088	13683613	24427838	40003284	49111672	38846480	46375200	54565652	24364688	13269283	91549904	30982860	42305664	38388724	34873988	31789202	40899720	33697984	58853252	55761728	13907520	31997346	75882304	43710088	39790040	49510056	55217556	18998184	26473246	46171244	30057866	30858756	56184816	36064876	38606088	43400300	32297338	43489472
		propionylglycine	31932	LC/MS Neg	100001150	960	130.051	21709-90-0	98681	-	HMDB00783	75798	110013	73322	171082	92891	154608	222974	151593	294823	118094	166348	177992	569867	192448	143631	108337	117034	208410	271206	290028	54478	148708	168715	75261	87399	154018	105970	150511	298915	165281	135428	474273	387519	87205	118493	237745	284730	175593
	Fatty Acid Metabolism(Acyl Carnitine)	3-hydroxybutyrylcarnitine (1)	43264	LC/MS Pos Early	100003926	2400	248.149	-	53481617	-	HMDB13127	1632044	450703	13192914	1535856	3198398	2954963	1073403	2434963	1183799	1704782	1431660	2377340	885458	1056773	1996303	1811321	2938969	1295991	1353306	1778669	504769	3104422	2685977	1790850	3498436	1348822	3059503	1414470	ND	1235586	5162779	687825	1157569	1477092	2014030	3816036	485774	2916408
		3-hydroxybutyrylcarnitine (2)	52984	LC/MS Pos Early	100009271	2340	248.149	-	-	-	-	2954798	791203	23355972	1742894	4443255	4449332	1265608	2740644	1799020	1133903	2797474	2352132	1149220	1614513	2650721	1783055	3990863	ND	1404458	1857534	865076	7123579	4522133	2497016	4835802	1514551	2393744	1605045	ND	1561457	3658425	847839	1430584	2401471	1951415	3897045	632746	1935509
		acetylcarnitine (C2)	32198	LC/MS Pos Early	100000802	2282	204.123	5080-50-2	1	C02571	HMDB00201	749618496	234352528	1173831680	700521984	663630720	800868032	465912256	797748608	464957600	272010304	740740288	821318336	450154496	636195392	776203840	628565504	732002304	261615296	537823296	656101888	244356160	748206848	889861184	592664384	862271552	566100992	734814272	445330272	285790368	587335360	960426560	400336416	675592576	571810304	665749440	695431296	350986464	730878400
		adipoylcarnitine (C6-DC)	52988	LC/MS Pos Early	100006614	2558	290.16	-	-	-	-	1280924	618006	2373769	941569	1294679	1164879	466527	1289570	655148	4.05954e+06	1409835	836623	1.02414e+06	395080	653302	1384963	2750993	4.1823e+06	422502	1098811	460822	868074	669458	860726	956800	748765	4538147	3626228	2492106	479447	1.82713e+06	682750	290908	623123	2117276	3697702	459822	1090971
		adrenoylcarnitine (C22:4)*	57528	LC/MS Pos Late	100015850	1415	476.373	-	-	-	-	670653	194135	322378	583686	328812	382174	467648	468074	218339	302651	700193	529121	217798	183224	435297	494554	388754	415920	401542	380591	191523	488952	987802	421932	407179	434013	509341	231338	285423	286268	498486	186149	216828	484605	461383	352277	345665	460127
		arachidonoylcarnitine (C20:4)	57518	LC/MS Pos Late	100015837	1353	448.342	-	-	-	-	3.34128e+06	1210284	2371442	2981568	1.80296e+06	2681839	2429160	3601688	1400711	1.69163e+06	3635882	3056850	1136602	1294085	2534601	2661053	2189875	2493757	1784555	2490442	1178752	2759515	4591206	2606920	2329131	2865749	3.35452e+06	1450287	1509508	1460571	2941180	1.01076e+06	1399937	2606017	1.91666e+06	1852138	2213118	2265706
		arachidoylcarnitine (C20)*	57513	LC/MS Pos Late	100015833	1512	456.405	-	-	-	HMDB06460	1054253	1109154	724803	1334587	2.06789e+06	1675635	1578898	1094383	1766689	809090	1131058	1359367	687684	1379847	1248624	1675870	1093701	580417	1165625	1754256	944629	947064	1715354	1646188	1864691	1805940	784967	1129170	1125363	928176	1738871	448523	1194625	1282632	1482217	992205	842440	1307447
		behenoylcarnitine (C22)*	57514	LC/MS Pos Late	100015832	1561	484.436	-	-	-	-	428572	409806	324216	484512	873656	966623	927626	391941	770107	359096	398065	651677	535749	855678	748640	861237	502471	254661	513758	1120309	365581	327366	424816	544492	982229	1047749	279522	429035	604026	436306	510492	219087	504757	738386	565160	473417	365686	537569
		cerotoylcarnitine (C26)*	57516	LC/MS Pos Late	100015835	1649	540.499	-	-	-	HMDB06347	6718768	3089405	4332752	6959979	6868130	6521106	7.43006e+06	7325470	7.95418e+06	4664437	7.07785e+06	7226096	5289154	6964097	5855609	6.77709e+06	6056763	4159357	5822875	8413216	3719362	3534307	6471937	6668080	6.2765e+06	8634285	5524811	5248922	4413334	6420457	5523165	3014682	6.21082e+06	7280651	5393658	5355383	5.18078e+06	7055345
		cis-4-decenoylcarnitine (C10:1)	38178	LC/MS Pos Late	100002259	1057	314.233	98930-66-6	-	-	-	91501656	37107244	44261544	38244040	40618864	80658192	59933832	76453888	53088348	35861200	47518472	43585272	24210024	88895248	65166024	73920504	31386860	12802591	14357865	77238432	31427782	39878196	26414326	46112116	67028716	118685416	72749920	40768732	20441156	59081900	36594736	35093408	72722128	50164080	58184520	28495638	18515928	37713072
		decanoylcarnitine (C10)	33941	LC/MS Pos Late	100001251	1130	316.248	1492-27-9	10245190	-	HMDB00651	29256492	11332349	24436102	19169216	20954512	22824396	19188078	45180728	22637490	21960310	27837008	32458924	11540482	40616912	25590108	38874496	20726032	6225539	6.80546e+06	55853836	16250844	23938596	21216956	21479740	32896868	53633736	47060136	16703437	9992973	33787088	21654998	11053207	39587916	16860308	34330640	13464564	5647099	19999140
		dihomo-linolenoylcarnitine (20:3n3 or 6)*	57521	LC/MS Pos Late	100015840	1392	450.358	-	-	-	-	2867072	1125866	1965848	2629486	1604295	2138180	2302555	3827601	1332286	1.49592e+06	2800690	2250839	942313	927347	2374687	2604263	2.06424e+06	1.89937e+06	2318388	1.8606e+06	1152808	2163901	4398430	1992752	1972799	2376357	3.80027e+06	1316169	1351728	1.77217e+06	2042775	985657	1417804	2460176	1904403	1879580	1676052	2764810
		dihomo-linoleoylcarnitine (C20:2)*	57520	LC/MS Pos Late	100015839	1436	452.373	-	-	-	-	1980647	1042798	1571760	2040142	1639335	1866018	1677979	2205338	1199863	1129297	1852026	1711997	642755	1095688	2412594	1598636	1260427	1209900	1472544	2069312	1033052	2107020	3727620	1609569	1746894	2127723	2345593	1202047	946284	1509329	1435770	702673	1391631	2031744	1370134	1297731	1263172	2120317
		docosahexaenoylcarnitine (C22:6)*	57523	LC/MS Pos Late	100015845	1349	472.342	-	-	-	-	1013910	267439	1432893	625562	756915	1.54114e+06	451017	936896	511094	450344	1001231	389873	297129	1496352	721576	339825	380104	ND	121454	515121	310301	1233423	665787	905064	2678431	789178	899431	453162	371505	1043561	378308	163618	665875	565786	394400	408202	54242	230741
		docosapentaenoylcarnitine (C22:5n3)*	57529	LC/MS Pos Late	100015851	1387	474.358	-	-	-	-	673882	175417	587073	369488	406995	791445	370953	669094	359980	426536	555433	308513	ND	459367	491862	310397	426882	208914	244313	305241	ND	718255	931059	667570	724022	429705	640682	336425	421267	387188	487397	ND	328354	629565	284243	382967	193119	336560
		eicosenoylcarnitine (C20:1)*	57519	LC/MS Pos Late	100015838	1484	454.389	-	-	-	-	2939738	1801971	2289929	2457399	2499860	2272544	2376234	2909307	2256338	1.64928e+06	2613829	2684224	1134277	2453539	2770074	2471121	1.74021e+06	1.6005e+06	1299366	3688399	1969792	2629304	3607156	2717916	2332307	3352026	2843843	1882591	1566362	2183435	3184307	903519	2128987	2409125	2137045	1773658	1411813	3025969
		erucoylcarnitine (C22:1)*	57525	LC/MS Pos Late	100015841	1535	482.42	-	-	-	-	559514	492197	500170	549125	579639	482326	431765	586297	856073	417791	580252	579887	338055	792999	527238	409185	477786	279331	250232	943003	493117	484359	472167	567690	475634	811264	556668	564914	325398	461047	623184	179824	572582	585540	395972	287590	279252	454328
		hexanoylcarnitine (C6)	32328	LC/MS Pos Early	100000781	3308	260.186	6920-35-0	6426853	-	HMDB00705	7044415	2180709	7046237	4975055	4339819	5416343	3672317	7841748	3812073	2563060	5450437	5117103	3365815	9277318	5759039	6249685	4509069	1856290	3149164	7406116	2227047	4307060	4863095	4575554	6380410	7.35123e+06	7260051	3348188	1960117	5157810	5.95785e+06	3248921	9570876	4526833	6639750	4117173	1814530	7002831
		laurylcarnitine (C12)	34534	LC/MS Pos Late	100001392	1235	344.28	25518-54-1	10427569	-	HMDB02250	32224160	12442360	34123360	19330388	27789044	21774886	16927992	42413796	22841368	14856715	21071172	32011232	13959370	25623772	28626924	24793884	20748890	5.44713e+06	6671959	30338096	15589587	18763340	15275448	27472914	28460796	37686032	38524444	16631069	8997379	29132408	32825100	13718935	25623292	21824520	25269580	17685524	5074471	17892000
		lignoceroylcarnitine (C24)*	57515	LC/MS Pos Late	100015834	1603	512.467	-	-	-	-	4618584	3.2408e+06	2597082	4622243	6803961	8008842	6534240	4.15279e+06	7251038	3132781	4340675	5136006	4930475	7029662	5537580	6936768	4501080	3122487	4137943	8119284	3696591	2841800	3947058	5014202	7443064	7.36375e+06	3071351	4396457	4479206	3999713	4142534	1951195	4918828	7075029	4499106	4820292	3527905	4935726
		linolenoylcarnitine (C18:3)*	57511	LC/MS Pos Late	100015831	1310	422.326	-	-	-	-	3161351	1721400	3338427	2262264	1746256	3523054	2667251	3498634	2200654	1423795	2498044	1.97663e+06	1290598	2080959	4389287	2632116	2162685	1422271	1346908	2198318	1535067	2808806	3208854	3049026	2565491	3.9825e+06	3492453	2019002	1278782	1971545	2483444	1521303	2359148	3630694	2025598	2477021	2106746	2183190
		linoleoylcarnitine (C18:2)*	46223	LC/MS Pos Late	100003151	1430	424.342	36816-10-1	6450015	-	HMDB06469	32047502	18314416	31457938	27854952	25021666	39128304	36790416	42076252	23308782	20469184	26186804	26623028	12335531	24671806	39388056	27640114	23162298	19661656	15241807	25182154	16840860	30480980	51544852	31176850	36578232	43696584	41706812	22273962	17908138	24678934	28356180	13148368	22604282	35668168	22106466	22270388	23984832	26086960
		margaroylcarnitine*	57512	LC/MS Pos Late	100004054	1424	414.358	106182-29-0	-	-	-	2386389	1477312	2219341	2.01593e+06	2205358	1.88118e+06	899092	1800649	2.05531e+06	1090488	1.81205e+06	1878492	1306981	1618405	1817726	2862851	1596504	686434	1305182	1.53575e+06	1867614	1755979	4416702	2.0548e+06	1764300	1326454	1.74892e+06	1647058	1.55464e+06	1265858	2604218	984482	2.01449e+06	1826054	2452999	1682829	712222	1903826
		myristoleoylcarnitine (C14:1)*	48182	LC/MS Pos Late	100006051	1316	370.295	889848-55-9	-	-	-	40467480	12903699	66031180	24006752	27346956	21300040	18346012	44526564	24171744	18773968	25084208	38880472	16524466	26650588	43852504	24482088	23653888	7534543	7138005	36021124	16261974	30292870	24163314	28401642	28850948	41771392	45286308	22469390	10324267	32904892	52301872	20467724	26645918	27286452	25218698	22367734	5502794	28326028
		myristoylcarnitine (C14)	33952	LC/MS Pos Late	100001270	1350	372.311	18822-89-4	53477791	-	HMDB05066	12299487	5754986	15707646	9545273	11676392	10746441	6060359	12820113	8.18494e+06	5440216	9148158	12261772	6194915	8438957	10156360	9785755	9510070	2921380	4886412	9602705	7.23543e+06	8978732	12498831	11088720	11437104	9371032	11742177	6561112	4903060	8181983	17439590	5537467	8824678	8552657	10365854	9012848	3049720	8811669
		nervonoylcarnitine (C24:1)*	57531	LC/MS Pos Late	100015846	1602	510.452	-	-	-	-	1221468	849634	984121	1363576	1222156	1494103	1049215	1299623	1372360	989828	1167743	1074254	840925	1854245	1372583	1308477	1096235	649079	870881	1420218	925044	936007	1083882	1236392	1569625	1492869	1111333	839903	922654	1215124	1247087	419900	1305784	1489942	1054065	1017571	670229	1495609
		octanoylcarnitine (C8)	33936	LC/MS Pos Late	100001247	950	288.217	3671-77-0	123701	C02838	HMDB00791	71939256	27231706	49393020	39165608	42331212	55796092	51858696	99647000	52423292	41562108	50638024	46920072	25884116	107671256	61857052	85714456	35858992	13753194	14806415	93498928	31124244	38747604	28969572	49382472	64776740	111029520	94620752	34118640	22174764	65619128	36215124	25890980	106906712	47368744	75498144	29912346	14918604	42955216
		oleoylcarnitine (C18:1)	35160	LC/MS Pos Late	100001501	1423	426.358	38677-66-6	6441392;53477789	-	HMDB05065	66631096	33766652	64922612	62001896	46555616	56755196	48090408	81881904	44150640	41253008	52899448	58204528	34196068	47411832	61442668	57676592	47431628	34040520	29510340	56018376	36000544	55074692	115242816	57385748	56196208	60459716	77883600	42366332	37930836	49295548	67117200	30543010	46935460	58070760	53199764	42859680	25576424	59576256
		palmitoleoylcarnitine (C16:1)*	53223	LC/MS Pos Late	100009406	1357	398.326	-	-	-	-	14890853	5799286	22390628	11846867	10391319	9073024	6197123	15195419	9180717	6826153	10641672	13661280	8.30331e+06	8.20838e+06	13178449	9246902	9874692	4450206	4473468	12311192	6629315	12313752	16394105	10713179	10825237	10798874	15396349	8451264	4474136	9164672	17771812	8463568	9150185	11402220	9876378	9183302	2991644	13203284
		palmitoylcarnitine (C16)	44681	LC/MS Pos Late	100000776	1425	400.342	6865-14-1	461	C02990	HMDB00222	40560496	23984272	34676192	40770056	43840016	38294428	26421684	54507004	29591716	20848164	34102144	36838632	27715798	27641732	36640564	42447472	33920348	16168052	25758136	34169100	25251564	29594746	84954920	43224120	38603604	34106756	45172096	24752130	20463446	30321026	43163288	24036126	31286896	38085020	40404280	33741380	18573896	34204984
		pimeloylcarnitine/3-methyladipoylcarnitine (C7-DC)	53224	LC/MS Pos Early	100009407	2773	304.175	-	-	-	-	630545	287755	318101	190282	476102	227849	260055	489687	721169	618268	588380	292007	308276	557682	346161	325909	330701	77657	141412	534905	460843	306482	180310	517501	305310	665501	ND	380931	454148	361715	297041	191991	160438	194300	502196	196593	153437	268559
		stearoylcarnitine (C18)	34409	LC/MS Pos Late	100001391	1485	428.373	18822-91-8	6426855	-	HMDB00848	14989194	13707672	9746360	18522868	20873368	16732550	13485416	14122931	16924396	9419937	14236048	19893944	11975847	13568152	15874198	24472544	12230464	6678878	15786501	15960902	11494483	11332633	42688816	17843622	19900412	16384863	13182946	14769308	12389492	13472984	23078532	5697602	16194242	14984703	18433086	12830281	12687291	16723126
		suberoylcarnitine (C8-DC)	52990	LC/MS Pos Early	100006627	2964	318.191	-	-	-	-	573121	280432	1262872	281595	663861	584771	180821	587008	305926	ND	372265	783636	415850	317376	318366	691118	973978	ND	295859	276019	219354	369752	253192	431523	537587	325744	930598	440337	ND	224731	2314268	275721	270986	209747	1224743	974316	56802	503144
		ximenoylcarnitine (C26:1)*	57517	LC/MS Pos Late	100015836	1607	538.483	-	-	-	-	4948400	2222148	2618287	4940658	3817441	4683095	4119136	6409272	5100063	3.64676e+06	5056679	3.36551e+06	2833616	5748324	3859278	5270055	3412957	3181181	3.47555e+06	3315796	2730388	2665550	4784278	4613040	3932667	5266772	4270549	3917903	3756332	5372348	3371520	2173772	4.01509e+06	4265471	3802145	3.45303e+06	3583344	5138524
	Fatty Acid Metabolism(Acyl Glycine)	hexanoylglycine	35436	LC/MS Neg	100001527	2900	172.098	24003-67-6	99463	-	HMDB00701	ND	75635	105573	103104	32595	60697	70960	76369	98480	113390	ND	217805	212015	118503	112521	141014	84372	27536	108578	57471	59817	78063	104749	44855	105896	147670	89709	133540	67661	44075	369422	218781	118808	35216	196383	60547	ND	176280
		N-linoleoylglycine	32462	LC/MS Neg	1506	5510	336.254	2764-03-06	6433346	-	-	155549	ND	429408	177121	271269	ND	188162	147353	285311	247699	ND	531149	283374	227172	292329	ND	364538	ND	ND	201513	246922	478686	ND	ND	139929	92779	190858	368437	82458	158161	662412	365923	244498	297275	ND	218637	142241	547969
		N-palmitoylglycine	42092	LC/MS Neg	100003686	5580	312.254	2441-41-0	151008	-	-	1327909	695355	1350924	1226986	803000	1.00056e+06	919575	819524	1048117	907038	980246	1983024	1.0439e+06	1.0469e+06	847222	895251	2193613	330120	709768	807147	738575	1085316	854175	795567	710633	530812	863668	1157295	512156	714529	2018146	2117063	865200	1323455	985204	1229056	465814	1164760
	Fatty Acid Synthesis	2-methylmalonylcarnitine (C4-DC)	35482	LC/MS Pos Early	100001596	2440	262.129	149181-64-6	53481628	-	HMDB13133	286142	233933	318009	243371	569159	215417	325580	440542	302754	ND	304667	461588	175175	156099	390255	423367	321187	ND	241457	333856	284874	377248	235633	478614	208897	348273	ND	194242	189958	366200	465171	134892	179485	395405	379382	253786	238045	214316
		malonylcarnitine	37059	LC/MS Pos Early	100001526	2086	248.113	853728-01-5	22833583	-	HMDB02095	439420	257741	844100	564319	705793	322386	266063	771308	278263	282657	512374	359455	332663	ND	271356	705261	417680	312829	327926	690528	324667	718562	664365	536304	355240	369586	509764	250441	324645	697419	513424	277197	266544	482128	619555	534738	358994	428342
	Fatty Acid, Amino	2-aminoheptanoate	43761	LC/MS Pos Early	100004542	3160	146.118	1115-90-8	227939	-	-	1599903	1792112	1614187	ND	1697981	2568764	2247832	1810967	1170972	1719590	1013332	1520725	2126305	1502218	1592323	1198168	2162798	1153557	1262564	1672417	2328554	1974788	987696	1702639	2955092	2233975	1016149	706646	1229683	1.83914e+06	1171663	1.82323e+06	729122	1172836	1946424	1869486	1977171	937026
		2-aminooctanoate	43343	LC/MS Pos Late	100004227	750	160.133	644-90-6	69522	-	HMDB00991	378914	577902	1092737	255892	427997	1622163	997886	658839	453796	562032	190970	629116	307114	407264	605045	967926	776300	239344	528660	606540	733458	1139963	170192	203362	2204673	1457905	362756	255503	457802	617718	615984	247396	201529	263980	662127	582893	380085	419515
	Fatty Acid, Branched	13-methylmyristate	38293	LC/MS Neg	100002344	5499	241.217	2485-71-4	151014	-	-	32759024	19785642	37265852	20571800	32445544	23054700	9533057	25271628	24434006	18825726	19229110	64390144	24588216	41395988	22739232	31850274	40439516	11550332	23494198	12308914	33311702	29618722	33840112	32197894	30849946	12724630	34081564	30898882	13911794	13141597	86959864	22251444	36796444	23990420	43808312	42029996	7006606	33134594
		15-methylpalmitate	38768	LC/MS Neg	100002945	5695	269.249	-	17903417	-	-	61484936	63614772	92195344	60844272	67038000	59201976	22974040	55942780	56138600	31532822	44131564	96317864	52866824	76326168	53600012	88718608	94488632	34580080	37143236	27169976	54557436	73694328	90422984	72524008	55723568	23573174	85968088	65588196	31455900	43914248	127944192	72405512	74271824	56076856	111845640	115688880	20170660	86014368
		17-methylstearate	38296	LC/MS Neg	100002356	5993	297.28	2724-59-6	3083779	-	-	3905070	4016236	7042597	3.691e+06	4269897	3675399	1295609	2825925	3230773	1950269	2268236	6880509	3.79134e+06	5780016	2768984	5633707	5417948	1654220	2314967	1749308	3.5626e+06	4933992	5236660	4.18052e+06	4716308	1724140	4321190	4419377	1651436	3346412	8770335	5933961	6498484	3422680	5958557	6006027	1616258	4161554
	Fatty Acid, Dicarboxylate	2-hydroxyadipate	31934	LC/MS Polar	100001153	3000	161.046	18294-85-4	193530	C02360	HMDB00321	ND	371063	853998	355838	431487	566255	345164	448553	374785	957301	428977	445839	404305	ND	516386	400574	ND	545414	527310	280821	ND	534969	277789	535966	375360	512088	294968	ND	362745	394070	513613	296622	ND	ND	648511	474727	ND	424838
		2-hydroxyglutarate	37253	LC/MS Polar	100002070	3352.8	147.03	40951-21-1	43	C02630	HMDB00606	12329234	9420172	14357453	6180262	19207176	14029346	6.60456e+06	9188857	13089662	1894571	13267785	10796563	8849259	14398843	9590437	11894008	2994561	2486725	11479811	14320058	7.7692e+06	11453809	14511950	15592701	10176856	8336504	1750381	1729927	3206628	8794340	10980857	7.00727e+06	10947948	11299415	10262936	2575793	9168408	10638905
		3-carboxy-4-methyl-5-propyl-2-furanpropanoate (CMPF)	31787	LC/MS Neg	100001178	2840	239.092	86879-39-2	123979	-	HMDB61112	75868640	42080600	394713216	20540492	150360480	300103648	37157808	75762448	64194728	230405200	45489076	21368932	26330740	140719968	18161044	5209320	20431024	2036526	12517952	52168500	41134312	395328928	16097134	177358176	305567904	43854200	42407912	44969552	255411872	110709472	21788172	20849138	88468248	15623994	4935525	26649212	2725034	10366277
		3-methyladipate	36749	LC/MS Polar	100001765	2865	159.066	3058-01-03	12292	-	HMDB00555	177452	103504	491100	ND	191329	70792	ND	173900	218975	79607	151753	124867	119731	398349	210689	ND	ND	39440.7	93238	74628	56801	222826	76879	276652	131307	124599	112529	154045	94147	145130	240074	124353	151764	174362	140218	87705	ND	50176
		3-methylglutarate/2-methylglutarate	54676	LC/MS Polar	100010834	2832	145.051	-	-	-	-	164526	136483	976865	139208	342142	286854	355865	344160	167712	215018	395808	289238	560962	356136	83544	308673	348762	115976	253196	219121	232809	632129	ND	123462	197198	518467	311446	318056	105421	238054	403110	464458	209225	192763	186687	276811	ND	132037
		adipate	21134	LC/MS Polar	100000863	3000	145.051	124-04-9	196	C06104	HMDB00448	175128	275880	1.99115e+06	464840	396655	552573	481620	389652	411347	137353792	417055	528213	323194	416992	193374	556123	57503468	200289696	504163	151941	405922	526018	208284	350215	460321	302414	133696768	160957216	82017432	376722	934413	177979	492792	394817	575310	112898176	175686	106501
		azelate (nonanedioate)	18362	LC/MS Neg	2029	1276	187.098	123-99-9	2266	C08261	HMDB00784	682891	430444	892769	554927	521582	702410	766518	1169227	945850	7.09468e+06	542571	474814	1100691	566133	862729	882523	2169111	9618339	1635555	434046	392083	735542	681542	447418	631931	594458	5363540	5415344	4529558	451469	565136	653428	600093	602369	643086	4957927	466108	571515
		docosadioate	39837	LC/MS Neg	100002952	5291.8	369.301	505-56-6	244872	-	-	446326	886305	416208	290885	262759	914987	514391	1058874	663553	637585	223507	317679	426114	970102	517692	1530091	273861	651927	373375	239243	200139	508150	367288	714354	436236	1203115	341127	279038	935991	417520	392268	353625	568988	197398	260575	689727	442690	282432
		dodecanedioate	32388	LC/MS Neg	100001102	2990	229.145	693-23-2	12736	C02678	HMDB00623	1186775	554735	1706792	643111	652050	731882	544347	1064233	1025365	985627	462830	4363204	784384	2047112	723641	662832	1039032	1258906	746254	673791	519481	424723	804969	739845	867540	592385	957955	1.33326e+06	674178	480389	8080263	754589	1167550	735890	928603	1584651	262108	540716
		eicosanodioate	39831	LC/MS Neg	100002951	5200.9	341.27	2424-92-2	75502	-	-	755642	770117	892542	1254964	849834	1712403	1062835	1795615	1167904	1751530	604660	749264	1382508	1139035	1387247	2127145	707250	1746830	754051	569527	1042186	1143121	775252	1083568	844227	2.05033e+06	641864	810869	2369879	1210632	1.04146e+06	524009	1412641	776553	950711	648583	1292480	907265
		hexadecanedioate	35678	LC/MS Neg	100001614	4615	285.207	505-54-4	10459	C19615	HMDB00672	1587056	969571	1751828	1276436	985780	1541908	533364	1682170	1001730	888846	670590	3138507	1460091	1571138	1434536	1033361	1253402	260849	617129	1401226	700174	1071362	1987755	869843	1060332	941454	1001231	905933	853942	687743	8222297	1179708	974488	1349731	1354400	1074697	334956	901109
		maleate	20676	LC/MS Polar	100000707	2510	115.004	110-16-7	444266	C01384	HMDB00176	1257449	509501	648468	427344	451684	1046402	534217	975047	583686	2014607	526132	516032	542380	730887	848001	800791	2448130	2325101	2186830	486634	331266	492624	718038	698211	603747	321976	2384747	2286791	ND	526277	498470	671982	631076	725925	805352	3149004	502982	519363
		octadecanedioate	36754	LC/MS Neg	100001615	5043	313.238	871-70-5	70095	-	HMDB00782	1.50704e+06	1.15741e+06	2.71107e+06	1476789	1783871	1.6023e+06	826973	1.58061e+06	1.68284e+06	500064	944453	2.06152e+06	1.76085e+06	1.0699e+06	1.83238e+06	1.6083e+06	1.50413e+06	250129	315612	1.77698e+06	820043	2.09145e+06	1.39551e+06	796850	1.16778e+06	1.22455e+06	920206	1.27939e+06	751593	1.13343e+06	3924900	736112	750331	1670572	1.85877e+06	1.4145e+06	385280	1.12223e+06
		pimelate (heptanedioate)	15704	LC/MS Polar	100000101	2745	159.066	111-16-0	385	C02656	HMDB00857	59860	31739.8	84225	ND	38463.9	ND	ND	77356	36224.1	287405	54964	63981	122871	ND	ND	ND	43363	388207	109344	ND	ND	ND	52322	ND	55074	42780.8	222462	213056	156011	ND	83026	59809	37494.2	35243.5	63243	258206	ND	ND
		sebacate (decanedioate)	32398	LC/MS Polar	100001211	2147	201.113	111-20-6	5192	C08277	HMDB00792	358108	201790	1882930	187012	319665	440940	351919	339981	264035	3722743	205585	696908	410282	650340	277308	403706	879558	4248851	559247	139665	222507	314882	281872	346807	423607	331851	2348486	2.42234e+06	1389495	200394	2594918	238058	388282	190674	493897	2420044	184747	236487
		suberate (octanedioate)	15730	LC/MS Neg	100000016	804.3	173.082	505-48-6	10457	C08278	HMDB00893	274726	278732	465695	111779	303982	313182	181396	325854	241690	1136536	294715	388115	430711	230103	178038	214573	503812	1456556	645959	ND	305942	223367	273624	230552	354541	203798	923916	610379	674173	145514	740729	359685	290822	ND	303535	803332	144012	302485
		tetradecanedioate	35669	LC/MS Neg	100001613	4000	257.176	821-38-5	13185	-	HMDB00872	932623	667870	1411886	800814	673527	1316837	426045	1340429	815455	684803	500756	3770211	989256	2147630	825105	993946	986939	370431	474464	627301	542546	601607	899967	805224	1.00802e+06	714510	833596	841168	624651	682325	8501756	606269	1271110	794209	1029034	1193478	411734	481375
		undecanedioate	42395	LC/MS Neg	100001617	2440	215.129	1852-04-6	15816	-	HMDB00888	336017	256479	301370	272320	358885	267533	343201	335505	316109	2510828	254960	331976	361170	314985	333135	339324	858697	2782365	382622	208720	268572	316145	281205	330187	236624	293458	1483871	1057020	1401642	216778	398709	269209	244841	269942	267961	1.97858e+06	309664	221480
	Fatty Acid, Dihydroxy	12,13-DiHOME	38395	LC/MS Neg	62	5137	313.238	263399-35-5	10236635	C14829	HMDB04705	313891	613082	451314	382632	168361	351384	344206	342082	492137	431136	224594	470891	605605	368569	359303	516975	183124	372726	1.02248e+06	139839	593826	391063	68190	266836	1.8082e+06	518349	289312	287322	288554	184215	596766	283983	457901	503038	385454	258946	236455	411300
		9,10-DiHOME	38399	LC/MS Neg	179	5180	313.238	263399-34-4	9966640	C14828	HMDB04704	277649	313729	591565	175755	110755	201914	268592	281116	191055	213225	228112	462688	386706	262698	206986	203654	231658	303833	819142	115879	462314	505971	ND	197037	548262	220754	330659	324742	287804	145005	481742	277199	320269	223784	245704	197369	345653	162156
	Fatty Acid, Monohydroxy	13-HODE + 9-HODE	37752	LC/MS Neg	100002196	5275	295.228	-	43013	-	-	2889127	1500032	3138847	594524	2658661	2778604	1466831	3.77872e+06	1376207	1.21767e+06	1.30711e+06	5738035	892998	3998165	1463287	2555204	2631489	2215157	5448391	520380	2577118	3018730	4222715	3.01676e+06	6.32913e+06	1597684	2950020	2265199	1748680	1885017	6141074	1793321	3512281	1249841	461401	4077030	1975364	4463858
		16-hydroxypalmitate	39609	LC/MS Neg	100002953	5236.2	271.228	506-13-8	10466	C18218	HMDB06294	2119658	1.9281e+06	1969013	2230959	1.75229e+06	2312402	996258	3017352	1525315	2221360	767740	4239458	1765703	1959956	2968571	2384119	1654386	1541079	1117935	2305228	1116555	1718510	2975472	1762857	2691498	1187037	2544542	1287238	1306416	1036554	4397127	1.81402e+06	2520138	2154144	2797639	2754926	1274907	2304464
		2-hydroxydecanoate	42489	LC/MS Neg	100004089	4840	187.134	5393-81-7	21488	-	-	2035604	2860802	1712635	1668641	1228023	2744489	1.90302e+06	2136801	1528114	2358408	1852545	2388752	2838907	2744065	2742527	5958490	1751868	1799614	2947373	1433836	3221983	1753239	2151742	1863049	4879351	2.00023e+06	1303564	1435872	4679006	1776377	3385492	1228194	2618317	2.02439e+06	2260272	1570900	1678636	1160664
		2-hydroxyoctanoate	22036	LC/MS Neg	100000743	3736.8	159.103	617-73-2	94180	-	HMDB02264	479649	888387	618305	333962	493711	1150336	823093	609955	401337	1519856	355570	591054	640193	486242	606028	911227	1.01288e+06	815310	882994	477203	746492	662840	323189	592308	2043873	1210058	657101	561002	1763877	445221	425271	346448	366261	322455	651282	1083437	452669	469358
		2-hydroxypalmitate	35675	LC/MS Neg	100001579	5511.2	271.228	764-67-0	92836	-	HMDB31057	59553496	65032340	80543096	59838592	77145904	47995992	46650204	70378968	72416840	47108464	38075864	99379664	67221120	62029888	60207004	58722296	89759736	30979274	46785912	52573656	53043200	70438680	52107644	67532280	55517640	49682308	68133168	87933968	44565388	46719880	84957448	111193432	67289768	95586272	58720500	85287896	41115296	50819692
		2-hydroxystearate	17945	LC/MS Neg	1239	5695	299.259	629-22-1	69417	C03045	-	15010413	17752182	18722132	16806184	20911424	13053505	12147149	12658717	19603828	11771834	9512948	24233734	18107360	13895755	14654342	12688708	22351008	8.35099e+06	16071177	11463265	13700119	22215476	12437955	17735752	13705154	12867174	15389551	24925608	10775578	14072543	19985256	34282768	17072090	23696204	16101069	20478772	9939422	12938495
		3-hydroxydecanoate	22053	LC/MS Neg	100000997	4634.7	187.134	5561-87-5	26612	-	HMDB02203	2636077	1154685	2551134	2266689	2877855	1857094	1.98586e+06	3085932	1227121	1418772	1156684	2847290	1.0252e+06	4.18398e+06	2791475	3042572	3054023	740729	1120264	1408173	799626	1639580	2638633	2521299	3088175	2884938	2536393	1694137	604689	1814141	3874152	851839	3247115	1.97351e+06	3268655	2699940	479860	1524343
		3-hydroxyhexanoate	53230	LC/MS Neg	100006367	1725	131.071	10191-24-9	151492	-	-	839434	605494	4274398	652696	900098	702598	453380	1073648	724583	536419	479721	833756	607024	891676	1210329	519663	768528	269855	458696	814397	485331	1189083	519041	583913	879555	689688	1334143	681631	432476	554576	1426857	572906	972517	751165	770617	904962	184468	786811
		3-hydroxylaurate	32457	LC/MS Neg	100001112	5175	215.165	53941-38-1	94216	-	HMDB00387	2414709	1318503	2611888	2132441	2706042	2025816	1951160	3134066	1.24056e+06	1736252	1115907	3539977	1347336	3774828	3156421	3903140	3062669	840946	567251	1624402	1161908	2044423	2604004	2677780	4127579	2577498	3418638	1622069	324231	1.76653e+06	4372399	975441	3801931	1627414	3762526	2837188	335735	1783168
		3-hydroxymyristate	21158	LC/MS Neg	100000882	5335	243.197	3422-31-9	16064	-	-	5508445	5010709	7.06558e+06	6513166	6634667	4274743	5390160	7922538	5396293	4331303	3142965	9245452	5.78248e+06	7766048	7807021	9103153	8548813	3687748	3449191	4462605	4547201	5545378	7845757	6710154	9512335	5398557	9337348	6.09185e+06	2863969	3202226	11038135	5883380	9094903	5725710	5882367	10662378	3014901	5636365
		3-hydroxyoctanoate	22001	LC/MS Neg	100000773	3446	159.103	88930-08-9	26613	-	HMDB01954	2085438	727459	3688833	1089896	1585757	1027793	1001427	1854578	755540	1131794	873538	1495471	656328	2555467	2037307	1189471	1319013	469189	885312	940046	769749	1047507	1056012	1151825	1474046	1496051	1457357	926588	668293	1010058	2029640	500784	1814685	1396954	1266528	1122708	294527	773958
		3-hydroxysebacate	31943	LC/MS Neg	100001145	1282	217.108	73141-46-5	3017884	-	HMDB00350	628126	133198	1144534	187994	220560	212178	99029	304422	254074	39488	159253	529055	169906	555292	281145	176201	192153	56210	122617	156012	73607	252442	131732	199766	194819	180363	159914	122419	88855	47192	1805904	57428	263063	154775	266000	248498	ND	116189
		5-hydroxydecanoate	43011	LC/MS Neg	100004091	4080	187.134	624-00-0	1825	-	-	ND	ND	67033	ND	ND	ND	ND	ND	ND	259901	ND	ND	ND	ND	86615	ND	110537	277732	ND	32791	ND	ND	ND	ND	ND	ND	176889	220785	121426	ND	ND	32501	ND	ND	ND	186867	ND	ND
		5-hydroxyhexanoate	31938	LC/MS Neg	100001148	1267	131.071	44843-89-2	170748	-	HMDB00525	ND	255045	998139	309643	203712	182746	127805	496900	369549	1163997	155005	252618	247246	148914	118460	146607	460538	1566170	126581	325913	190091	472764	234688	142266	ND	152364	1687442	1460998	536228	264197	385269	283269	132973	ND	193299	869955	80841	125302
		8-hydroxyoctanoate	21239	LC/MS Neg	100000956	2300.4	159.103	764-89-6	69820	-	-	ND	104356	105617	ND	119413	ND	ND	ND	ND	1239668	ND	ND	55366	ND	170903	ND	362504	1241360	ND	ND	ND	ND	ND	ND	ND	185037	639336	1240034	641884	ND	ND	158981	ND	176542	165422	862605	ND	129623
		9-hydroxystearate	47120	LC/MS Neg	100005834	5384	299.259	25498-28-6	9570127	-	-	1572011	2121748	4.09369e+06	2648041	2957693	2429125	1371619	2452418	1774723	2063375	1964736	7052092	3011718	2341365	2226180	1768112	2928060	2205250	2.91303e+06	1169929	3104033	3346863	3113655	2175511	3208582	1490196	2032534	2103140	1.23564e+06	1407449	6535585	2.7064e+06	3154189	2470138	2357601	3222343	2438003	6562104
		alpha-hydroxycaproate	37073	LC/MS Neg	100001723	1920	131.071	6064-63-7	99824	-	HMDB01624	182435	66270	107097	ND	ND	454204	95960	ND	18024	547331	100584	ND	222389	ND	111951	166629	365856	443375	ND	ND	ND	ND	94167	ND	ND	ND	523517	309955	352233	74402	ND	ND	ND	ND	ND	523592	ND	ND
	Glycerolipid Metabolism	glycerol	15122	LC/MS Neg	1254	758	91.0401	56-81-5	753	C00116	HMDB00131	8650906	2898714	10409195	6412252	6165432	9435379	2752805	6.81963e+06	4514280	2622042	5275344	8234030	6127611	6089793	8275366	4896497	7.5438e+06	3143890	8112656	5101872	4107340	6.89063e+06	6.17689e+06	4936847	13708678	4563645	7868678	3794540	4350497	4609984	9582159	5497151	6510508	6771162	7.19677e+06	7731774	3407019	22303108
		glycerol 3-phosphate	43847	LC/MS Pos Early	100000258	580	173.021	29849-82-9	754	C00093	HMDB00126	ND	ND	55867	67105	ND	192686	66671	75533	ND	982865	ND	74139	175718	179172	93376	ND	169547	600744	157843	138550	60988	187005	113024	ND	ND	ND	945762	1133003	ND	ND	147665	218537	130336	ND	ND	242817	314364	145389
		glycerophosphoglycerol	48857	LC/MS Polar	100001619	2430	245.043	-	439964	C03274	-	684838	288777	382383	385723	467312	520583	360586	376810	663398	ND	192662	202873	298102	384075	508727	351283	192693	138736	549247	372023	447522	206753	2291325	290453	287701	181482	136325	78573	616514	232955	173437	522617	422988	446171	212099	165183	924163	603351
	Inositol Metabolism	chiro-inositol	37112	LC/MS Polar	100001859	3191.2	225.062	643-12-9	-	C19891	HMDB34220	2481442	4361026	94325	180820	ND	163032	139957	1524084	81322	63789	ND	ND	432819	193211	990944	315704	256444	ND	ND	ND	162238	839796	75909	1576160	ND	299232	496498	ND	229763	347579	198123	333035	ND	2331825	593634	120669	ND	ND
		myo-inositol	1124	LC/MS Polar	363	3506.3	225.062	87-89-8	892	C00137	HMDB00211	14546859	11927776	14032352	12864214	18520404	8234592	11138617	18100108	13220911	9416604	19338900	11143017	13278586	11475117	16080175	13585881	10335575	5451486	10988789	12028238	13451445	10548756	14838262	18221546	8812026	12892745	14893183	8702907	10476857	13974984	11905211	13966906	11296459	18746844	13659380	8710824	10345067	12365255
	Ketone Bodies	3-hydroxybutyrate (BHBA)	542	LC/MS Polar	254	1443.3	103.04	625-72-9	441	C01089	HMDB00357	12486536	6382760	291822688	12473755	26354278	20649718	6918571	14463692	21717476	5571785	6990709	43683536	10955298	22783746	25677500	13091255	12240976	4258068	8793866	11982772	9937463	48982044	23132262	17135766	31641588	10874001	18019124	28213846	5043088	8.28043e+06	156990384	6225572	27495982	9062807	19922250	15330326	4621344	38579824
		acetoacetate	33963	LC/MS Pos Early	1218	1062	103.039	3483-11-02	96	C00164	HMDB00060	ND	ND	3110671	ND	ND	ND	ND	ND	ND	248017	ND	495510	471859	259875	360112	ND	577531	ND	992570	ND	ND	479143	ND	340662	524288	ND	781845	ND	ND	ND	1334806	ND	192079	ND	ND	624330	ND	690403
	Long Chain Fatty Acid	10-heptadecenoate (17:1n7)	33971	LC/MS Neg	100001278	5555	267.233	29743-97-3	5312435	-	HMDB60038	126954056	61658628	162380736	127038960	147694208	74084264	33040050	97382952	81333880	46746236	64151544	222859936	142194960	107739448	99945912	123422120	179808416	35689868	54657148	63962612	79349144	123959504	200287312	132920736	125060440	38367832	167035184	97937168	26732296	47346548	258798144	168747712	124983680	117630800	193155856	213367824	25176650	310223904
		10-nonadecenoate (19:1n9)	33972	LC/MS Neg	100001277	5780	295.264	73033-09-7	5312513	-	HMDB13622	31055764	25526738	47414068	31103030	34581040	34405520	13159022	32211832	23451156	13150800	13829119	51614312	23202780	42405508	26732872	42278500	43881268	12489657	14746838	13528352	23581912	33431492	54187140	44378752	35506608	12231274	54705032	27167404	7929191	18863492	80519456	34388088	40433420	28273670	63310176	66195220	8012366	54013692
		arachidate (20:0)	1118	LC/MS Neg	893	6295	311.296	506-30-9	10467	C06425	HMDB02212	29000492	23859916	29013580	26067030	24385040	22674430	22890312	27004628	27624290	23172208	19055604	41353328	27723750	29714306	24005572	26363736	31821218	19792168	26797182	21635192	21071824	26552328	26113088	25568810	27719636	20982380	31002672	26199480	23261060	27818946	59748416	39168060	32980206	31767774	26348772	29380052	21077044	24263152
		behenate (22:0)*	12125	LC/MS Neg	314	6745	339.327	112-85-6	8215	C08281	HMDB00944	4943511	771958	4929015	4952695	2545089	ND	2003926	3016914	5694573	4137719	1108092	7619472	4475413	8671956	5755280	ND	4488768	1895356	5250274	4969835	3490426	4061122	4306159	310328	2819992	4353728	2852043	5026913	5581323	ND	8535827	5575711	6749123	6321341	ND	2026783	3201525	5092481
		eicosenoate (20:1)	33587	LC/MS Neg	100001335	5950	309.28	-	5282768	-	HMDB02231	67877592	64206688	147468032	83954072	113061536	70703848	45184792	102492608	47302672	37631292	39009164	141402384	45927240	143414064	74978768	75924160	109513592	36658496	35161864	46636960	63102144	94902448	128257176	113550688	109531456	48640312	145057200	71609048	19400732	75094536	244029728	61467656	124990184	77923856	124924144	141609008	25021256	148076240
		erucate (22:1n9)	1552	LC/MS Neg	1087	6355.6	337.311	112-86-7	5281116	C08316	HMDB02068	6013403	4498086	10298121	5740145	6818424	4733728	4069010	6.39393e+06	5019295	4491471	2984356	7909727	4102253	18531692	7603786	6076234	5427296	2798160	3709247	4764366	4195091	7642448	6374667	7786234	5.71598e+06	3772974	7535418	5631739	3387771	6436195	10572679	7432609	11453308	6972017	7781705	6209150	2902226	6335223
		margarate (17:0)	1121	LC/MS Neg	891	5731	269.249	506-12-7	10465	-	HMDB02259	157860240	109641984	133380728	104733744	162815680	158537760	66107464	117146792	108756992	58447528	76516240	216754016	93690896	153853760	113095504	196165664	173257040	56173252	61568072	54485968	84294000	103994832	188908352	203931584	160307776	56334728	185648080	95528344	44736728	82267464	280652032	207730576	158112688	127296712	261226032	246567504	47497676	171728240
		myristate (14:0)	1365	LC/MS Neg	519	5440	227.202	544-63-8	11005	C06424	HMDB00806	539241920	330558016	599670784	530231616	700575488	381818592	239507024	675598336	353895392	365118944	342021408	1327629440	553054848	627316224	428037248	500392800	770050752	215378384	412945536	309388768	489259872	516267072	703180928	609750016	730868224	248167616	715371200	443595872	176385184	343049024	1557564160	487553568	626122432	499029216	794622080	923417792	153466928	1095932416
		myristoleate (14:1n5)	32418	LC/MS Neg	100001198	5346.9	225.186	544-64-9	5281119	C08322	HMDB02000	50665312	29890580	73944840	51846864	55149764	30277926	17668940	69171440	32435758	43568940	26060576	143306848	84576824	64939328	56848012	67725752	65669016	27841916	29494616	30092792	40864836	55522620	102558056	54637200	60995424	21447528	71900824	44806568	13077661	24020624	189711296	46259816	65012348	51154728	81564472	96830400	13500843	180743376
		nonadecanoate (19:0)	1356	LC/MS Neg	892	6068	297.28	646-30-0	12591	C16535	HMDB00772	6096974	6359749	7890680	5752854	6.57326e+06	5471133	4182296	5784851	5876432	4824543	3.54237e+06	10960065	5506924	7908415	5742945	6546087	8632422	3740105	4879609	4238104	6053465	6438660	7331588	6.51399e+06	6815244	3988614	7375622	6942353	3642929	6016628	15014439	8720477	9785296	6483083	8148529	9094645	3749240	6532367
		oleate/vaccenate (18:1)	52285	LC/MS Neg	100008930	5655	281.249	-	-	-	-	6705183232	5322374656	7598870528	6659173376	7920987136	5608518656	3968782592	7147174400	4995387904	3908596480	4592135680	9830315008	5869023232	6907254784	6740122624	6214395392	8584640512	3827014656	3676810496	4441007104	5612699648	6599047680	8660928512	7488830976	7505389056	4387005440	8616194048	5939369472	2718497280	5783469568	11746016256	6490351104	6850643968	6779264512	8649092096	9705802752	2831684352	10324473856
		palmitate (16:0)	1336	LC/MS Neg	424	5618	255.233	57-10-3	985	C00249	HMDB00220	4506415104	3574915328	4973700608	4569500160	5555261440	4361733120	2761092096	5914097664	3264237568	3215698688	2841076736	6829747200	4252294400	4606594048	4253479936	4684844032	5872399872	2656986112	3108532992	3517442304	3681559808	4259782912	5553530368	5370514944	5940412416	3250618880	6020285952	3840241664	2143810432	4597122048	6825473024	4862247424	5276199936	4533756416	6065059328	6761917952	2327536384	6533935104
		palmitoleate (16:1n7)	33447	LC/MS Neg	452	5475	253.217	373-49-9	445638	C08362	HMDB03229	1057382528	461093120	1583044352	1527195648	1331180544	479682112	324261440	1367806208	743972608	612964608	680710528	2517958912	1526125952	744503040	1102475392	702859904	1872850432	313667424	513731072	815878528	797662080	1283767808	1841037824	931650368	1184343424	416444416	1584158720	1136041600	206445408	505838080	2924196608	1251093504	1102792832	1435141632	1279954432	1894135424	216699344	3448507136
		pentadecanoate (15:0)	1361	LC/MS Neg	980	5521	241.217	1002-84-2;10002-84-2	13849	C16537	HMDB00826	109226048	81174112	102525720	96197648	116783088	76018048	62083424	103979168	89732544	83286344	74371944	156995904	102297688	97512776	82100312	96424328	133399432	52802368	89047024	82822104	89890880	95918264	109599408	107546400	92038192	68372704	125787368	91103976	66384724	84108424	147410272	152046672	117000776	102652024	134990240	137004336	55322092	150516704
		stearate (18:0)	1358	LC/MS Neg	439	5872	283.264	57-11-4	5281	C01530	HMDB00827	2610793728	2498996992	2642383104	2398996736	2957732608	2686510848	1921856384	2352032256	2091585408	1682270848	1609312000	4002768128	2363428608	2825354496	2299830784	2965338880	3330317824	1539657472	1874686080	1585453696	2082490752	2273407488	2949799168	3016139264	3285798144	1750777984	3013608704	2371282432	1370554624	2555428096	4739762176	2971205632	2939222272	2554790144	3383224576	3559314176	1618870912	2755454464
	Lysolipid	1-arachidonoyl-GPA (20:4)	46325	LC/MS Neg	100004442	5499	457.236	799268-65-8	-	-	-	292204	ND	ND	ND	ND	ND	ND	ND	ND	2312421	586273	ND	ND	ND	ND	ND	ND	1507462	ND	ND	ND	ND	ND	ND	ND	ND	1800117	3003774	ND	ND	ND	613449	ND	ND	ND	ND	ND	ND
		1-arachidonoyl-GPC (20:4n6)*	33228	LC/MS Pos Late	100001551	1460	544.34	-	-	C05208	HMDB10395	170760912	113944832	93318344	118796880	91814752	120520784	86187576	67098328	135530400	114265216	176120496	126685064	172584496	66609212	138532944	113771216	86825776	66653476	85939624	122366320	158711264	121449312	72573584	106711336	127589832	127543504	70343128	123756328	118756376	65413740	91992816	105598608	80095080	128536112	80978144	77123560	105843344	68380720
		1-arachidonoyl-GPE (20:4n6)*	35186	LC/MS Pos Late	100001571	1470	502.293	-	42607465	-	HMDB11517	15190649	11929334	9187165	12535827	12610194	11702112	8449922	8526937	11342109	9875337	14784602	15835144	13490976	8346909	11631073	14922776	11234630	7261320	11677734	12524455	14822480	9972884	13706127	10965602	12908479	10253447	8689200	9371358	10670956	9897867	14641599	12900918	10368164	10384193	12238093	11734584	11795008	10306515
		1-arachidonoyl-GPI (20:4)*	34214	LC/MS Neg	100001654	5482	619.289	-	-	-	HMDB61690	15462381	6700187	16974936	16255302	14998445	27903932	4626219	4387566	10294003	6994834	36994220	11783280	17133288	6249777	7.91819e+06	5394449	14041545	3839684	11051995	3726465	9287242	12059999	5932187	5376875	11429910	5841725	5102603	20849052	4533558	15631562	11039482	19010730	7.11844e+06	13932217	11563336	7222288	6009110	9034843
		1-lignoceroyl-GPC (24:0)	49617	LC/MS Pos Late	100002873	1907	608.465	325171-59-3	-	-	-	885155	898049	610228	ND	784371	526569	1091138	ND	1.85067e+06	663295	727031	977260	1535388	811765	1571267	663205	434485	414116	802071	1104116	1184518	387609	776999	714861	738955	964514	534725	1311532	671360	709375	693432	674544	905617	1.68138e+06	ND	541254	390090	611507
		1-linolenoyl-GPC (18:3)*	45951	LC/MS Pos Late	100005350	1422	518.324	-	-	-	-	4064001	4156526	1620195	4429717	1927563	5402497	3941139	4266038	6521764	4309385	3992333	3849922	6229313	4110011	6808441	7628481	3765892	4053587	5710784	2642944	5266803	3005877	4121437	4231919	3848038	5999090	4552228	5231538	5660021	3746388	3291867	4771219	4.4816e+06	6412723	4730781	5318565	7490250	3587668
		1-linoleoyl-GPA (18:2)*	52690	LC/MS Neg	100009082	5483	433.236	-	-	-	HMDB07856	558070	551999	ND	226128	ND	337921	273133	827206	564134	4203372	1272003	166389	358593	470808	313301	331860	280982	4711272	448113	239197	575105	ND	369207	259606	416409	ND	4424800	6.97163e+06	196311	201549	206418	1346428	ND	236372	253886	1062205	314096	295805
		1-linoleoyl-GPC (18:2)	34419	LC/MS Pos Late	100001395	1465	520.34	-	11988421	C04100	HMDB10386	375566272	439330560	185761264	373546528	289790528	465432064	480134528	334999008	563427008	498062720	374493632	426630944	417281984	423272896	597006080	539024576	357716544	360533056	523297120	331238048	535011776	378959552	249653984	342915488	471440160	582368512	343029440	447422848	630897280	473077088	340668768	273947648	449091968	469813024	357596832	335762400	627478272	377872352
		1-linoleoyl-GPE (18:2)*	36600	LC/MS Pos Late	100001570	1482	478.293	-	52925130	-	HMDB11507	11496397	12677193	4989608	12938143	7590168	13200464	12607867	13302959	12402402	11920784	11259064	15465811	15012475	11435071	15885091	24043638	13700116	12030492	24594132	11469151	15067209	10150357	12877926	10060225	14250606	15847027	13448374	9346549	17238368	16397850	13840941	12796317	15986379	12318818	16312378	15412154	25349412	12488184
		1-linoleoyl-GPG (18:2)*	54885	LC/MS Neg	100009227	5516	507.273	-	-	-	-	1467276	453476	1825577	2002939	2556255	1853659	1295700	396461	1209891	599584	2034738	2617016	1613055	572879	1250364	477220	2821449	304908	1.95703e+06	921189	1168821	1849949	855583	601250	1286190	903777	557041	1399671	448188	1100299	2283099	1812590	834031	2068665	696571	773014	763321	1348656
		1-linoleoyl-GPI (18:2)*	36594	LC/MS Neg	100001778	5494	595.289	-	-	-	-	4.00061e+06	2175097	6732734	7027761	6.82976e+06	13275946	2292349	1842102	4009552	2474657	11750900	4981781	6729027	2406493	3.86362e+06	3531370	4325157	1288058	6402500	1109337	3.47811e+06	5038941	2561473	2628142	4212259	2684681	2367800	6141983	2108603	10545199	4019132	8060456	2475932	5169772	6681372	2638100	2318960	4877969
		1-oleoyl-GPC (18:1)	48258	LC/MS Pos Late	100001272	1540	522.355	19420-56-5	16081932	-	HMDB02815	315206944	265705200	149856272	237952640	161863344	227536336	228090608	234758544	320732352	375266560	310694368	269187072	289285152	239095424	281554048	339186784	195905632	248913360	304647328	258680144	320286080	236722048	192094656	207276832	238106192	293928320	226219968	281022912	401563168	291110208	207689504	196889664	281440832	273721760	235743888	193982800	324247200	247462448
		1-oleoyl-GPE (18:1)	35628	LC/MS Pos Late	100001569	1554	480.308	89576-29-4	9547071	-	HMDB11506	9844015	5757258	4006157	6078054	6035837	6895001	6027766	8624836	6091591	8842010	8384153	6.75032e+06	9903784	6075231	6.59144e+06	12293700	5377355	6.33742e+06	9884469	6.4855e+06	8021908	6.14751e+06	7980227	6.61565e+06	7.70739e+06	7555498	6452059	3954890	13722680	9082846	4915920	8.21977e+06	6425255	5419080	7.12969e+06	5558116	10515064	5697310
		1-oleoyl-GPG (18:1)*	45968	LC/MS Neg	100005716	5610	509.288	-	-	-	-	7053644	1884866	3.53145e+06	4837091	5490718	6199438	4677225	758566	4.09598e+06	2.05839e+06	6002846	6820170	4435528	3038994	3333507	4877917	7516657	1821234	4341124	1.77048e+06	2519211	4406482	4746308	4935834	1449934	1196393	5622676	2749915	2464437	2482046	6137161	12547755	1.58458e+06	7572575	5054591	6344474	2426575	3312010
		1-oleoyl-GPI (18:1)*	36602	LC/MS Neg	100001777	5599	597.305	-	-	-	-	5492433	1.9185e+06	2100780	3.99995e+06	7191731	14417444	3226965	ND	5541136	3083356	13304773	2.51508e+06	6836815	2037805	2248720	4537828	3123937	1303351	4384785	ND	2368622	3.34533e+06	2867576	3215720	2027978	1456994	2484511	6143322	3005655	9315981	2.02327e+06	12046263	1.89522e+06	5956865	7.27147e+06	2128231	1609290	3307993
		1-palmitoleoyl-GPC (16:1)*	33230	LC/MS Pos Late	100001511	1450	494.324	-	24779461	-	HMDB10383	34391328	24769522	13493915	37140560	17740548	26004884	22091808	34842040	34566104	32251154	31848220	35833620	49150728	22487664	34942804	51441580	26023552	19643868	40017912	28808596	32823276	20218130	35277856	26751898	28084142	27839476	41761752	34039012	32753420	34817920	23718582	40647396	27755470	39361024	33262120	28203906	31848888	27170484
		1-palmitoyl-GPA (16:0)	34428	LC/MS Neg	100001445	5600	409.236	17618-08-5	6419701	C04036	HMDB00327	249575	142125	ND	252139	ND	ND	ND	332456	ND	2658079	ND	ND	ND	124038	ND	ND	ND	1.48e+06	ND	92987	ND	ND	189109	ND	ND	ND	2738160	2810050	ND	ND	ND	480593	ND	90040	ND	424661	ND	ND
		1-palmitoyl-GPC (16:0)	33955	LC/MS Pos Late	100001263	1525	496.34	17364-16-8	86554	-	HMDB10382	881539456	946607040	485576928	1026667008	685712256	990112512	905399168	928294336	1018490240	940630080	855517248	790792448	743578176	859036736	935887104	1202780928	764439808	765210048	796245056	792977600	883592320	654408000	929811968	973448896	985694464	923171840	973850304	869408192	1010820096	1060552320	690051328	766327040	820166272	1004304256	984295680	855147200	1016583168	697964672
		1-palmitoyl-GPE (16:0)	35631	LC/MS Pos Late	100001567	1544	454.293	53862-35-4	9547069	-	HMDB11503	9430181	8324695	3263732	7033435	5.71637e+06	8235259	5123561	7160672	9317670	7066908	10924937	6999756	8686549	7382955	5823660	7986002	6100514	4190309	7.44305e+06	7085381	8229985	5153652	8332300	6855783	8101014	5.71253e+06	7955853	8113714	8966454	7720559	6116488	9072664	7159099	6585667	6204727	6522114	7966593	3742577
		1-palmitoyl-GPG (16:0)*	45970	LC/MS Neg	100005717	5570	483.273	-	3300276	-	-	1901049	375168	832250	1765840	1489507	1.94729e+06	1084113	407060	1315342	576722	2178297	1393245	1762018	795317	765000	874459	2163135	293846	1550600	582425	855962	988617	1211986	1049850	655998	407482	1460186	964997	680191	705070	1407804	3029014	426641	1.78564e+06	1299922	1329300	766285	960467
		1-palmitoyl-GPI (16:0)	35305	LC/MS Neg	100001655	5564	571.289	-	-	-	HMDB61695	2841576	911555	822543	2769749	2428964	4064414	715187	601407	2347875	957373	4792218	2115459	4401753	678277	1140490	1.01548e+06	3108326	492016	3503726	ND	1340123	808881	777788	1257931	704034	418171	976569	4219076	690696	3153528	1468155	8616661	469359	3441156	2434527	1292129	911163	1760579
		1-stearoyl-GPC (18:0)	33961	LC/MS Pos Late	100001271	1606	524.371	19420-57-6	497299	-	HMDB10384	392086048	536822304	140018288	423943680	279620640	405864704	387146304	292333632	550522304	438381088	313815584	338388480	358938688	413284384	491961056	538562816	323609696	328578656	367763744	288795328	468150176	249447024	369359360	416250208	413297408	407774112	333283456	454568896	519025568	448173152	268762400	302950496	376310432	484225824	393250272	387927680	446245664	313825504
		1-stearoyl-GPE (18:0)	42398	LC/MS Pos Late	100001461	1626	482.324	69747-55-3	9547068	-	HMDB11130	12917916	13985801	6.20064e+06	12156982	14620651	10211792	8698456	9573284	16052396	11448289	14462720	10908761	12617838	10489031	10604059	18000274	10632964	6237749	12911393	9001126	12009720	8352295	15203462	12813273	11669170	10626759	10319545	11347647	15109118	12090476	9653609	11136903	11452180	12658012	12004912	11728837	12209183	9021530
		1-stearoyl-GPI (18:0)	19324	LC/MS Pos Late	100000656	1700	601.335	796963-93-4	-	-	HMDB61696	812070	472232	322362	350837	424715	603281	337032	230781	979998	265260	366014	420006	1064284	383942	573021	586888	381798	372212	1166087	207284	549941	529447	279020	521099	592275	397920	349926	1.0098e+06	175902	400529	152282	544203	495183	778994	421035	487096	500695	681518
		1-stearoyl-GPS (18:0)*	45966	LC/MS Neg	100004327	5800	524.299	-	9547101	-	-	1116156	823220	755517	398966	2588288	219100	414377	163849	1.84903e+06	ND	923963	773115	662405	327896	319746	609863	635848	ND	474541	342701	369067	189340	1730877	830672	433043	778779	ND	ND	955043	570416	367750	951580	347794	1039912	518903	352345	165807	617040
		2-palmitoleoyl-GPC (16:1)*	47118	LC/MS Neg	100001561	5720	568.326	-	-	-	-	761700	490875	286106	1042671	407739	ND	166309	984432	875685	422324	616725	1025132	1138035	520932	589118	663367	928469	424149	1.00755e+06	394374	585269	426445	577115	245828	372195	453171	875451	662424	634711	1275050	626608	2498516	706276	1059931	728949	816428	754490	720778
		2-palmitoyl-GPC (16:0)*	35253	LC/MS Neg	100001562	6215	570.341	-	15061532	-	HMDB61702	27672008	30335732	15208032	35472056	23270616	42061268	28798454	31503934	39202476	23784382	33936704	32716964	24782264	27612672	25119926	35679144	32566696	23280446	25136318	22739464	24499242	21163760	26875620	22222498	28618988	27261352	35638572	30785512	31387644	54015968	24488316	54225344	28410220	39866380	37304308	33684532	38923584	21161354
		2-stearoyl-GPE (18:0)*	41220	LC/MS Neg	100003901	6350	480.31	-	-	-	-	2.95442e+06	4363110	1800720	3745436	3723528	2933493	2713036	3266349	4576889	2618652	4575116	4655850	3394866	3169688	2066940	3859899	4424455	2029980	3361594	2464584	2790098	2442439	4449270	2.5477e+06	2869054	3001519	3.70957e+06	3746735	3658493	5755532	2.89271e+06	7.5866e+06	2950249	4347839	3407567	4182267	4092626	2537920
	Lysoplasmalogen	1-(1-enyl-oleoyl)-GPE (P-18:1)*	44621	LC/MS Pos Late	100005372	1566	464.314	-	-	-	-	2601598	1840730	1313131	1158245	4612568	912850	1307441	910272	2233893	556795	2168393	1054662	1123820	1561427	1517233	2714938	974513	288905	1438200	1078156	1606317	976866	2942649	2520373	1626719	2027324	339909	820935	1.90165e+06	1.81885e+06	779764	892216	1449716	1.89452e+06	1218823	709144	700511	1573657
		1-(1-enyl-palmitoyl)-GPC (P-16:0)*	52474	LC/MS Pos Late	100002875	1547	480.345	-	10917802	-	-	12683981	14979714	4310642	9687155	7238819	7832849	8439119	8877074	17032588	12734837	15161353	8913778	8472264	8770943	10376327	11475545	5979011	6159642	12842590	9079152	15064250	7920323	7993768	9411361	7998214	10620702	7.91203e+06	14807702	14532500	9198329	6665522	5964442	9938265	11091302	7064336	5916267	12145832	9004866
		1-(1-enyl-palmitoyl)-GPE (P-16:0)*	39270	LC/MS Pos Late	100003000	1558	438.298	-	-	-	-	5055577	3115225	2211002	2297854	7355940	2080798	2543020	2273607	3650581	1082012	4.17667e+06	1.95093e+06	1.93936e+06	2884024	2457995	4720357	1767954	626578	2950857	2179190	2786619	1450376	6254362	4710738	2932599	3048037	1028221	1315572	3318804	3555840	1442174	1416839	2971365	3412461	2336426	1530259	1486871	2768637
		1-(1-enyl-stearoyl)-GPE (P-18:0)*	39271	LC/MS Pos Late	100003001	1649	466.329	-	-	-	-	4574494	4453808	1965637	2749497	7819771	2.35764e+06	2775391	2177193	4829071	1616766	4224657	2703279	2361724	3160092	2193050	5340175	1960774	973127	3104752	2304505	3447954	1840846	6137112	4917157	3419046	3507484	934930	2521945	4129096	3612535	2006048	1477562	3413302	2944200	2581297	1714552	1770852	3045006
	Medium Chain Fatty Acid	10-undecenoate (11:1n1)	32497	LC/MS Neg	100001197	5085.8	183.139	1333-28-4	-	-	-	6674517	4305344	8490474	7210300	9610878	5135940	2375653	7.90755e+06	5173441	5245178	4241073	5559579	3860292	10236953	7806442	6454569	4929682	1912851	2083041	5128774	4904703	7031777	7.25138e+06	8731067	7650468	5266138	6.09394e+06	5142049	4819349	5.70449e+06	9919676	2124949	8876802	6248009	6954901	5.34472e+06	1082027	8638800
		5-dodecenoate (12:1n7)	33968	LC/MS Neg	100001232	5224	197.155	2430-94-6	5312378	-	HMDB00529	7.08341e+06	2900643	9199364	5715621	6387350	4737040	2672268	9343863	4500221	5344994	3431123	20159000	9028823	11851424	9124273	9893963	6570123	2857511	3.53858e+06	3332552	2838436	6598510	10275722	6250326	7.70008e+06	5252911	9719218	5023650	1.81793e+06	3206615	21153408	5588789	11541976	5925380	9679726	7.53818e+06	1.87489e+06	11983139
		caprate (10:0)	1642	LC/MS Neg	888	5090.7	171.139	112-37-8	2969	C01571	HMDB00511	15852498	10812391	15279222	13078777	17467268	13920023	7818494	14115049	11818799	14937006	6955999	34262468	16010149	33078638	11464912	20209280	12171273	7996759	28276076	8469584	14323392	11774778	14090189	11961626	18188180	9996608	11274942	11224743	10471437	9207966	35890432	7390159	27898892	11040102	23315040	13147298	6857399	16167327
		caproate (6:0)	32489	LC/MS Neg	926	2713.7	115.076	142-62-1	8892	C01585	HMDB00535	2245400	ND	2995720	ND	1141182	1777326	783613	1.79966e+06	2032203	8416156	ND	5716595	1769181	1936645	2339682	1259898	2990834	7796798	1442747	2568256	659328	2399225	1281192	ND	2877991	1.79415e+06	6885265	6322329	4996202	857271	ND	1398479	2336612	1285631	1261474	4459448	ND	ND
		caprylate (8:0)	32492	LC/MS Neg	932	4362	143.108	124-07-2	379	C06423	HMDB00482	4380809	2.05616e+06	10262253	2851282	2749063	3711230	2356238	4182477	4031336	7331356	3.15393e+06	6688647	4713679	6666566	3.76305e+06	4727598	3707155	4755000	5668146	4.01508e+06	2176187	3388410	3.68265e+06	3631692	4935650	3816013	6441351	5.79612e+06	3135038	2295849	5603131	2815173	7.74119e+06	4492934	5018533	4119580	1.80171e+06	3812148
		heptanoate (7:0)	1644	LC/MS Neg	925	3670	129.092	111-14-8	8094	C17714	HMDB00666	402123	421305	581098	379373	477462	617016	332800	589299	809889	4729661	ND	357279	485433	320028	1929516	434198	1306239	4.16051e+06	512920	1357573	338431	415534	553059	302409	414329	402145	3411540	3703277	2171707	188373	703741	426754	505472	599151	399058	2171527	551586	376882
		laurate (12:0)	1645	LC/MS Neg	181	5300	199.17	143-07-7	3893	C02679	HMDB00638	103102696	55958932	77152672	73314736	104454632	95006984	81655856	107770328	66908784	66157972	55437888	382432128	156111968	224043360	80537392	80373224	79473736	55120016	70865704	40588644	90990192	78681016	90007384	88455584	185225600	60175932	84368216	62311720	33582644	36512056	431136288	87821968	126818816	76608576	102585848	124896344	33442736	155521376
	Mevalonate Metabolism	3-hydroxy-3-methylglutarate	531	LC/MS Polar	112	2700	161.046	503-49-1	1662	C03761	HMDB00355	5128556	3905877	13610073	3092527	6587133	9516080	4666157	10052534	2520055	2.0454e+06	7316869	2.92604e+06	5917163	2541565	1883885	5588332	2534831	1798459	4500578	5048423	3093306	6211865	2443060	6457705	5181743	3.95275e+06	5026994	2535617	1777580	3637450	4.12147e+06	5691817	2633708	3926358	5777106	3168774	3711661	3.75584e+06
	Monoacylglycerol	1-arachidonylglycerol (20:4)	34397	LC/MS Neg	100001433	6250	303.233	35474-99-8	5282281	C13857	HMDB11572	2166603	723317	1137418	1190749	856591	575973	ND	790118	2435833	15760893	ND	1215541	2517491	797199	1052307	672837	1326749	7.94097e+06	2133561	740350	778325	2113778	1161249	664142	ND	509552	11394817	17445676	ND	ND	899342	4657897	762115	1.84753e+06	774124	4383035	751683	1602485
		1-dihomo-linolenylglycerol (20:3)	48341	LC/MS Neg	100006121	6400	305.249	-	-	-	-	869143	226987	235394	473420	245370	145923	249683	386844	352069	5695365	91328	446162	890738	270101	423387	331089	611296	5121620	1705436	184237	285547	245939	563475	448528	272157	145808	11140785	7536118	263001	98049	ND	1396259	250056	823691	309265	3.19067e+06	289300	1078409
		1-docosahexaenoylglycerol (22:6)	35153	LC/MS Neg	100001481	6150	309.222	-	-	-	HMDB11587	467059	188645	372373	ND	ND	470222	98350	179103	304796	5403392	ND	165379	653522	555223	159979	156534	495881	940968	407801	ND	180361	297145	427300	439221	877708	ND	5118915	5812232	136772	180689	ND	750415	297983	286435	ND	1315686	ND	352272
		1-linolenoylglycerol (18:3)	34393	LC/MS Neg	100001435	6214	277.217	124151-74-2	53480978	-	HMDB11569	572725	963282	ND	994312	440558	780520	470507	593976	456633	1178804	ND	ND	557665	ND	ND	686850	711824	981283	1805780	ND	351743	ND	927867	807174	620021	787609	3312714	2185202	ND	340287	ND	2551918	551706	793292	617190	2293440	799929	495233
		1-linoleoylglycerol (18:2)	27447	LC/MS Neg	100001040	6477	279.233	2277-28-3	5283469	-	-	11386631	9715573	8462260	17108404	10293889	10668503	10393496	16505225	8.17051e+06	123612040	4569010	7581102	9925679	5574722	7169842	10498090	13133019	73023464	40630828	9022953	6528269	7294108	12165422	11064136	10331351	11593613	112898912	113408360	10965061	7.7444e+06	4703490	35279204	8717237	15467138	8916531	40174008	8824808	17079928
		1-margaroylglycerol (17:0)	34391	LC/MS Neg	100001429	6571	269.249	68002-72-2	107036	-	-	ND	ND	ND	536226	ND	ND	ND	ND	ND	894840	ND	ND	ND	ND	ND	2610499	1683781	370767	689936	ND	ND	ND	ND	ND	ND	ND	648275	828200	ND	ND	ND	212423	ND	ND	1912105	102339	ND	ND
		1-myristoylglycerol (14:0)	35625	LC/MS Neg	100001618	6353.3	227.202	75685-84-6	79050	C01885	HMDB11561	849577	728999	312480	1292524	864729	1093535	ND	1121276	719109	2731023	749357	516684	1260030	ND	ND	8.12669e+06	6990035	1.65727e+06	5847923	ND	853187	518331	1363178	1169276	1122088	510465	5599826	3574141	695340	769625	ND	2914197	649412	702392	6.60382e+06	2342995	734805	702293
		1-oleoylglycerol (18:1)	21184	LC/MS Neg	100000924	6650	281.249	111-03-5	5283468	-	HMDB11567	38627848	12053271	10168938	23890972	13629434	10045444	22488198	18763536	12597883	70169464	6.79367e+06	6709521	17550966	8625772	7253923	20976904	18451298	39619948	62933028	9544773	7.90258e+06	11136078	21640004	33136056	10322648	15643546	99125144	51887364	10899180	13523309	3572943	44850596	10029573	14574511	17358092	48024016	12472871	24746596
		1-palmitoleoylglycerol (16:1)*	52431	LC/MS Neg	100008952	6094	253.217	-	-	-	-	1411491	796418	733197	3495413	957272	1406234	604458	4467192	968481	8158063	777749	855736	3277227	ND	ND	2599666	2949720	3706762	8416103	642417	720815	1125654	4567536	2537373	1600777	883763	19000248	10024065	592573	1524462	ND	10475009	1116693	1910636	3011293	5133333	1192190	2083012
		1-palmitoylglycerol (16:0)	21127	LC/MS Neg	100000827	6550	255.233	542-44-9	14900	-	HMDB31074	7682317	7.03766e+06	6631423	51813116	8121665	8088782	6469986	10277784	6947672	119630176	4515754	8545542	11851168	4842291	7080048	144573872	117056288	56449420	38605232	5405190	5445705	6024112	10399104	11031243	8836600	5549638	121125920	85423024	6210452	5.95476e+06	7655152	26380524	5428403	9138490	92673504	40223664	6668776	13592962
		1-pentadecanoylglycerol (15:0)	47898	LC/MS Neg	100001431	6200	241.217	104140-07-0	190750	-	-	361374	ND	ND	497025	ND	335129	ND	ND	ND	1570570	ND	ND	ND	ND	200364	2097822	1900697	683436	782625	485418	221373	ND	369248	192278	ND	ND	1597652	1.82122e+06	ND	ND	ND	769494	ND	600265	1.72798e+06	ND	ND	501195
		2-arachidonoylglycerol (20:4)	19266	LC/MS Neg	100000584	6170	303.233	53847-30-6	5282280	C13856	HMDB04666	391192	ND	ND	ND	ND	ND	ND	ND	318094	2101714	ND	339085	502965	ND	ND	ND	ND	1073770	464751	ND	216525	ND	ND	ND	ND	ND	2061798	2455596	ND	ND	ND	992753	ND	537589	ND	793912	ND	341687
		2-docosahexaenoylglycerol (22:6)*	48675	LC/MS Neg	100006352	6050	309.222	-	-	-	HMDB11557	ND	ND	70409	ND	ND	ND	ND	ND	ND	690589	ND	ND	132198	66800	ND	ND	142178	91120	ND	ND	ND	51931	ND	ND	226825	ND	625719	835276	ND	ND	ND	152137	74038	92964	ND	161100	ND	52417
		2-linoleoylglycerol (18:2)	32506	LC/MS Neg	100000987	6250	279.233	3443-82-1	5365676	-	HMDB11538	2257013	935930	1185462	2.0715e+06	903560	1402986	866681	560743	1246675	15408555	398136	ND	1604566	565407	1511523	1271807	2674995	7710784	5989982	2924539	753248	ND	1357327	1096551	706568	1452387	11783791	14485132	797233	1121169	ND	3449621	1336924	3280840	706022	4901677	1175967	2874903
		2-myristoylglycerol (14:0)	34383	LC/MS Neg	100001408	6230	227.202	27214-38-6	137938	-	-	ND	ND	ND	ND	ND	747125	ND	ND	ND	952612	935948	ND	ND	ND	ND	1974946	802062	321840	1.4064e+06	ND	1043165	536534	ND	ND	1008256	376918	1.63542e+06	639858	ND	962200	ND	ND	ND	ND	1.97373e+06	ND	ND	ND
		2-oleoylglycerol (18:1)	21232	LC/MS Neg	100000943	6500	281.249	3443-84-3	5319879	-	-	1173017	3399193	1423944	3426198	1039323	945756	2883000	2536422	2556450	10469905	517903	ND	1314303	999302	ND	2759915	2348805	5546408	7.78216e+06	1120941	ND	1324939	3.43147e+06	3.85613e+06	1116973	1186349	13467423	7.64954e+06	2117911	1332262	733375	5822542	1087558	1056407	1668915	7918400	ND	3521043
		2-palmitoleoylglycerol (16:1)*	52432	LC/MS Neg	100008953	6016	253.217	-	-	-	-	ND	ND	ND	489529	ND	ND	ND	167812	ND	1040392	ND	ND	ND	ND	ND	ND	ND	1308706	2.78569e+06	ND	79391	ND	459586	94712	299289	ND	3197287	1493575	82837	ND	ND	878407	ND	ND	353359	488610	201204	ND
		2-palmitoylglycerol (16:0)	33419	LC/MS Neg	100001048	6400	255.233	23470-00-0	123409	-	HMDB11533	1575487	ND	ND	5607511	1659701	516934	1631535	ND	578249	14503683	ND	1306325	1909179	ND	ND	16987970	12101849	8097654	4860464	ND	ND	ND	721122	ND	835942	1211783	13197330	10516980	ND	ND	1269324	3767845	ND	1894400	12572984	3841455	ND	2.03687e+06
	Phosphatidylserine (PS)	1-stearoyl-2-oleoyl-GPS (18:0/18:1)	19265	LC/MS Pos Late	100000639	3000	790.559	-	9547087	-	-	13280848	9398681	9490528	7089467	37196240	5031088	10701505	6147996	11874600	461313	10846978	6632194	5877059	7308180	8594504	10773746	6841673	339329	7057701	10587364	6.4863e+06	4760157	31939324	17605280	8625880	14667140	937253	909158	18178040	5.85406e+06	4528454	3195052	6.5053e+06	12568083	7.26916e+06	5572938	3770422	9976493
	Phospholipid Metabolism	1,2-dilinoleoyl-GPC (18:2/18:2)	52603	LC/MS Pos Late	100008903	2006	782.569	998-06-1	5288075	-	-	99692120	170172560	61497960	164114624	123067040	167299456	232969136	138947968	213184320	182832688	69584192	143658048	170395232	136778864	269231552	250970544	126278856	224238512	283054464	115142336	198695680	110048952	86260280	116069064	172691296	219506720	135101312	174801184	215428784	196096368	139160752	135245232	188426448	172304544	178093568	122200608	334178016	283385664
		1,2-dilinoleoyl-GPE (18:2/18:2)*	53174	LC/MS Pos Late	100009217	2083	740.522	-	9546812	-	-	ND	ND	ND	162488	130339	ND	291082	310399	ND	ND	134609	157374	251665	ND	ND	480162	ND	ND	1089012	ND	128822	209539	575077	ND	418335	318411	332835	ND	ND	376476	ND	ND	353902	ND	244207	350309	372115	415863
		1,2-dipalmitoyl-GPC (16:0/16:0)	19130	LC/MS Pos Late	100000657	2365	734.569	63-89-8	452110	-	HMDB00564	56816448	45146596	45433968	51047048	63314024	64397088	44306768	55773552	62806636	37822732	47777680	49844372	50763188	55846036	59694868	49946808	44037220	34377664	52257636	48994404	48357648	37101728	71298240	56295232	56364616	45100596	44934520	48725404	50866664	46290984	53433552	49593360	47317216	65487840	54180444	48132000	47262840	46830160
		1-linoleoyl-2-arachidonoyl-GPC (18:2/20:4n6)*	52710	LC/MS Pos Late	100009131	1969	806.569	-	-	-	-	86937560	87194856	46677720	122558952	98388328	101530384	95278416	77225632	111743744	80108432	73174224	107360712	126599064	56176064	133738752	127594784	78551296	84706328	115541792	89270112	119566064	80283160	100440360	82513672	112199088	104953800	68833688	97972488	115855512	88634784	82980328	99688552	102868720	117641944	105929104	72068176	105709944	117008776
		1-linoleoyl-2-linolenoyl-GPC (18:2/18:3)*	53176	LC/MS Pos Late	100009343	1939	780.554	-	-	-	-	7224310	10037618	2484917	11255218	4282625	16222787	8493510	6211494	24766636	5852774	4984069	5498062	14201328	17153476	19984254	13920533	3848546	4643430	14215151	3723998	10739219	4418672	8447402	8.38161e+06	7922591	14784489	8963142	13549782	7849824	10158514	4853521	13061592	19004442	14534006	7977311	7923665	16134075	16662024
		1-oleoyl-2-linoleoyl-GPE (18:1/18:2)*	52687	LC/MS Pos Late	100009078	2270	742.538	-	9546753	-	HMDB05349	3254769	2484761	2.08372e+06	3790907	2215548	3384917	5015140	6047618	3192347	3193716	2669952	3092697	6.64993e+06	3303671	2900913	7239164	3607585	2017035	10046231	3643091	2749361	2952966	9466171	2.07128e+06	3.60289e+06	5377465	7489513	2052100	4556041	5720517	2285060	7436071	4985317	2738154	5180065	4400604	4524835	7568072
		1-palmitoleoyl-2-linolenoyl-GPC (16:1/18:3)*	53180	LC/MS Pos Late	100009345	1850	754.538	-	-	-	-	2109878	2294814	975945	4706783	1615911	2921088	1607452	2304116	4165369	1386525	1580573	2665071	6120878	3346677	4228886	3528529	1766752	1.23235e+06	4247868	1372454	2701959	948316	4767108	2744895	2274192	2.3802e+06	3157723	3553406	1299683	2751390	1904019	6035678	4954595	5430910	3.82074e+06	2893922	2138432	4956443
		1-palmitoyl-2-arachidonoyl-GPC (16:0/20:4n6)	52462	LC/MS Pos Late	100008914	2091	782.569	35418-58-7	10747814	-	-	980105536	703933888	788280448	910876544	782442432	918697472	651335232	775252352	790868864	605136896	834486272	758785984	931338816	624739200	906102528	932180544	670356544	630568512	681170048	811798272	728218240	684967168	980792576	871462976	883075392	625425792	750444224	664448960	668534528	694016320	718070656	1025697152	597685504	977271872	925217664	775571328	743527296	663506624
		1-palmitoyl-2-arachidonoyl-GPE (16:0/20:4)*	52464	LC/MS Pos Late	100008990	2198	740.522	-	9546800	-	HMDB05323	10259803	8953789	9176880	16254922	10579978	9392762	10019207	14654548	10167534	7560411	14255843	11783652	23124900	6989910	7357746	13803666	12806992	4177762	16417581	12412007	9673131	9256567	29939816	8570225	11073997	10128328	15037897	7479555	9030698	9610768	10814371	25508260	9364481	9833879	12255694	15204396	8371031	11510401
		1-palmitoyl-2-arachidonoyl-GPI (16:0/20:4)*	52467	LC/MS Pos Late	100008993	2567	876.56	-	-	-	-	5042937	4247139	1314873	7913156	3487248	3816300	2516626	4418425	3532567	2791238	2258452	5911003	9502888	4838701	5232328	6911286	4068306	2842808	7489971	2573573	5280877	2103224	7920816	5000971	5575035	2580602	4686364	3393609	3536890	3901304	4121940	11826361	3964694	6285565	5441133	5854331	6527693	5367959
		1-palmitoyl-2-linoleoyl-GPC (16:0/18:2)	42446	LC/MS Pos Late	1537	2160	758.569	40811-94-7	5287971	-	-	1019369152	1163631488	843672896	1242277120	1140164352	1432239488	1234319360	1234676352	1340275328	979694080	882776960	1141220096	1193886336	1209528960	1432402432	1509668352	1060383616	1062085952	1302971008	978196224	1075681408	936544192	1361473920	1292334336	1324908800	1124732800	1240662784	1090025856	1133712640	1455405056	1058279168	1222910080	1156867200	1378218112	1432023040	1262275200	1395817600	1245766144
		1-palmitoyl-2-linoleoyl-GPE (16:0/18:2)	42449	LC/MS Pos Late	100001870	2275	716.522	-	9546747	-	HMDB05322	3600500	4321639	2969181	7067209	3.76716e+06	5402898	6416859	12644884	4281768	3.19681e+06	4376314	4711672	11569672	4665690	3969867	10581130	7173652	2662476	18004820	4757599	3941685	3.93458e+06	15072168	4290469	5433261	5655637	14178687	3388384	3629644	9653621	4468498	13281131	7019914	5144473	8862496	10442366	6.66464e+06	9035985
		1-palmitoyl-2-linoleoyl-GPI (16:0/18:2)	52450	LC/MS Polar	1528	910	833.518	-	-	-	-	311544	736260	241221	1514514	520681	398208	330400	769227	370512	455154	155629	814347	880973	500052	531460	1646342	542003	253880	953480	274095	678118	265812	820862	462661	589542	344078	523944	233362	416485	483618	749900	979667	535870	569572	1433142	547611	626750	1043493
		1-palmitoyl-2-oleoyl-GPC (16:0/18:1)	52461	LC/MS Pos Late	1539	2358	760.585	26853-31-6;26853-31-6	6436017	-	-	866485632	590161536	643316224	831022464	696412032	751427968	568735936	907572608	731269696	661328448	726033536	776401344	888428672	717545600	686941056	1081659136	654809408	716849216	933612352	701743744	643642752	600144704	1059243712	801616768	819920768	569871808	843193792	636742016	714825280	962531584	721985472	926181248	783946432	823662464	1013910784	768140480	829278208	815432512
		1-palmitoyl-2-oleoyl-GPE (16:0/18:1)	19263	LC/MS Pos Late	1526	2509	718.538	26662-94-2	5283496	-	HMDB05320	6467811	3829046	5.34032e+06	8586852	7530839	5474634	5329232	13865534	3846612	3589296	6119819	4594144	15246237	3170481	3695269	10104310	6411205	2897055	11717789	8368946	4571515	5096258	32024484	6852739	6047792	5239642	11666194	2282303	5116295	7170549	3674716	15028800	5046019	5090895	9157434	7971935	5265815	6786364
		1-palmitoyl-2-oleoyl-GPI (16:0/18:1)*	52669	LC/MS Pos Late	100009066	3140	854.575	-	-	-	-	2018605	2414109	824811	6.24904e+06	2527292	2077852	1445719	4243539	2530729	2605479	1140459	3620169	6229091	2512215	2734858	7.32803e+06	2043336	2.01172e+06	5759748	998279	3031855	1173127	7433965	3.89209e+06	2663506	1505784	4109541	2104454	3.3564e+06	3624659	2884339	6.03704e+06	2534329	3.14084e+06	6255991	2536105	2989809	3805150
		1-palmitoyl-2-palmitoleoyl-GPC (16:0/16:1)*	52470	LC/MS Pos Late	100008984	2160	732.554	-	-	-	-	62144904	31425812	46277680	107760168	44820096	57083364	31120800	92737232	51818160	42663872	50324512	84327616	140951632	42709880	53329016	129448344	78909192	50217784	122712080	43986848	46946596	39173944	145180096	65134844	73318312	27208106	99245088	55753812	39585592	68053616	70993960	144683376	63301488	75758872	130656848	93103152	65603436	77764440
		1-palmitoyl-2-stearoyl-GPC (16:0/18:0)	52616	LC/MS Pos Late	100008921	2653	762.601	59403-51-9	-	-	-	30486872	30223432	18427696	27341580	37487256	31061824	26627692	23924876	33615088	19766080	20657432	21115124	18685088	29053608	30307156	32895918	18437958	18220620	23814094	23835748	24317712	16665346	45613276	31835386	26494936	26198512	19836148	21923016	35616336	25392510	21159242	18479756	22465792	31784072	32334328	21637456	29059066	23885564
		1-stearoyl-2-arachidonoyl-GPC (18:0/20:4)	42450	LC/MS Pos Late	100001869	2300	810.601	35418-59-8	16219824	-	-	789084224	595468992	539597120	621365696	601205888	656547136	545023680	460174880	622132288	468865856	597944704	593203264	698012608	504323712	692909952	612327808	520421440	463944064	464300928	577655552	606863552	540628160	658257216	631132416	606899712	518249056	467823904	524213920	544380160	484527424	510670176	679340736	465774272	708029952	561272896	606539008	526948896	507275520
		1-stearoyl-2-arachidonoyl-GPE (18:0/20:4)	52447	LC/MS Pos Late	100008977	2424	768.554	-	5289133	-	-	46555512	43907952	38059500	57202616	60297304	39390336	39947112	41141988	47654192	24349348	45316056	39936672	58653148	28388572	34076336	57902276	43961480	14410408	48596932	48047180	35604056	35678432	76911312	43358160	43368640	42463772	45593800	24375768	42786476	34170312	35622792	62220988	36287328	46180236	51002732	57324968	28138576	43952268
		1-stearoyl-2-arachidonoyl-GPI (18:0/20:4)	52449	LC/MS Pos Late	100000616	3000	904.591	383907-33-3	-	-	-	55007680	46794604	34819080	57111028	44371000	47601252	35478948	34710872	49377108	32291256	32920676	43801308	47168616	42504768	44619996	50282748	38306504	31532368	46942232	38396740	47420784	33056574	66412208	45838412	54067676	42239272	33940440	37728572	39084696	41999256	40170176	45164920	42935216	51100424	41528936	48437552	46211700	48321524
		1-stearoyl-2-linoleoyl-GPC (18:0/18:2)*	52452	LC/MS Pos Late	100008980	2380	786.601	-	-	-	-	781152768	957344384	543200832	881450432	844002496	1032131392	987963968	736549696	1087086080	806556480	589588032	818717888	913613440	934039424	1125238656	1117439232	809133248	840612096	948147968	695200576	881931392	681299776	891862720	923043392	944008448	898532352	732764288	863926144	1003373952	1081313280	741499776	825908224	946528512	1055481280	964859584	955101184	1031095360	1001366720
		1-stearoyl-2-linoleoyl-GPE (18:0/18:2)*	52446	LC/MS Pos Late	100008976	2522	744.554	-	9546749	-	-	16250991	17624728	13465708	33203516	20495368	23350152	28253940	36107720	17330304	15413325	15704953	17385920	39557776	17851056	18617424	51548800	29115650	12128406	55127232	20103074	16368093	17413640	44437124	20499368	25215794	29162710	39722160	12972919	22081994	32475324	13330064	39459664	27242248	21382832	41097372	40062324	24792394	34137168
		1-stearoyl-2-linoleoyl-GPI (18:0/18:2)	52468	LC/MS Pos Late	100008994	3185	880.591	-	-	-	-	8040535	12360096	7.76715e+06	15788824	10578556	11814384	10822975	11772699	13205708	13219279	5281431	14866681	16036091	12398591	14564701	18354554	8680849	8889924	18197684	7766339	13467845	8330256	19447872	12713618	13096502	12175310	13740472	9650694	13808894	15758701	11822663	15010371	14129040	12632778	15025966	11674711	15100971	18269516
		1-stearoyl-2-oleoyl-GPC (18:0/18:1)	52438	LC/MS Pos Late	100008904	2644	788.616	56421-10-4	-	-	-	388514368	311771840	192781472	304091904	285079488	302902944	263017056	321513536	376582592	278184800	233299152	281542176	368227616	358255232	344096800	527684992	255085648	293107744	381070976	225235376	270711040	211592080	443901952	366254528	294797696	240627280	291535424	264037024	422210816	389174176	244296992	410349280	321598880	385356288	439585472	382375648	373338592	332407744
		1-stearoyl-2-oleoyl-GPE (18:0/18:1)	42448	LC/MS Pos Late	100001856	2858	746.569	-	-	-	-	5398715	4147148	4672492	7667506	9125585	6242512	6069689	9634903	3975304	3387877	4919234	3222230	12319716	3680187	3817667	13025901	5955409	2884243	10757606	5414092	4129789	5023686	19534310	7418325	7375910	6188050	7363893	1985337	7134860	7170773	2222986	10143274	5247204	4494291	8708058	7.5196e+06	5100089	6128682
		1-stearoyl-2-oleoyl-GPI (18:0/18:1)*	52726	LC/MS Pos Late	100009181	3711	882.607	-	-	-	-	1.95886e+06	2.96429e+06	1.02281e+06	4833770	2938891	1607185	2510978	3040100	3989481	3747020	1150463	2783548	5.74516e+06	2857403	3361970	6633854	1963013	2668971	4952997	1014911	3509504	1.57641e+06	5429339	4319712	3099434	2936061	2644702	2301714	4828985	3601469	2279585	4.18998e+06	3960693	3093128	5075147	2346451	4033892	4675070
		arachidonoylcholine	53261	LC/MS Pos Late	100009332	1390	390.337	-	-	-	-	2739681	1319855	745401	891569	707498	1722085	1311874	359317	3827671	931635	1856729	1542193	9108666	777852	2438993	1206032	1319747	374181	3853364	415457	2639588	3093477	183475	2550425	1879842	2461867	ND	3.82752e+06	763705	469384	287780	1682024	472827	2502258	459385	484466	986548	1.654e+06
		choline	15506	LC/MS Pos Early	1256	1961	104.107	67-48-1	305	C00114	HMDB00097	227708656	216129520	228419984	223212416	413932160	272327712	316910528	314634912	243658208	236041440	345982976	195355200	255780816	231482288	247099040	288617728	218545600	199795728	366520192	243704080	255579840	225881056	241655904	360545632	277275904	332060512	361156960	238306416	247955408	248087984	174856528	226991360	226266624	291499328	277889952	183326912	254431152	287346272
		choline phosphate	34396	LC/MS Pos Early	267	700	184.073	72556-74-2	1014	C00588	HMDB01565	10702423	13198679	10160931	7.34354e+06	32279070	11719772	12808410	7779991	17915844	1855719	8.22622e+06	8874831	7199346	9260375	7793410	14127581	8482130	1549261	11411357	12757574	8451465	5812749	24082136	18563844	13897364	14083804	1738627	517354	15116486	9354887	7289230	7892315	8283858	11129763	12082033	6134467	6.51429e+06	14193675
		dihomo-linolenoyl-choline	53262	LC/MS Pos Late	100009335	1424	392.352	-	-	-	-	575013	221541	66750	232868	102738	298829	366774	111705	791997	128947	291798	266658	2557593	126697	683248	393804	368242	86723	2286747	ND	547090	395826	ND	711475	336567	520507	ND	876069	141074	137970	ND	479030	86197	765313	173982	139734	226911	622833
		docosahexaenoylcholine	53263	LC/MS Pos Late	100009333	1378	414.337	-	-	-	-	966105	453156	155092	277214	276065	1029072	319315	121729	1443932	396025	531942	289940	1867362	671842	572421	207331	387194	ND	721801	106302	962435	915566	ND	1149199	1.01867e+06	740956	ND	1578785	298949	304640	ND	377472	352589	628082	89797	147351	66993	303605
		glycerophosphoethanolamine	37455	LC/MS Polar	100001620	3075	214.049	33049-08-0	123874	C01233	HMDB00114	624917	524283	393803	303560	613833	478105	345994	337634	741294	77478	491857	277903	428515	341286	294189	726868	195937	65497	549224	294859	384034	214208	1179560	428778	428328	420430	62855	108128	236634	337292	265761	552841	258156	508458	504176	183466	479584	646936
		glycerophosphoinositol*	47155	LC/MS Polar	100001621	3850	333.059	16824-65-0	-	-	-	65104	94448	ND	ND	91839	ND	ND	177836	104636	54543	ND	ND	247631	ND	ND	ND	124699	97475	143156	ND	ND	ND	77628	135566	102385	176845	131255	175490	ND	ND	ND	134155	ND	48815	ND	145742	ND	68592
		glycerophosphorylcholine (GPC)	15990	LC/MS Pos Early	100000269	672	258.11	28319-77-9	71920	C00670	HMDB00086	99036736	108697024	54311384	86320744	83236216	72757248	71342408	62486440	146845504	89951008	81160880	60945928	92529016	86932808	89855312	104477168	65701924	61799520	108315064	56177632	88833184	63354372	99231944	71268016	73099568	83997216	51884152	97545480	127581392	68232312	53829808	79383920	81648816	118718208	73146272	62534200	101314872	77189384
		phosphoethanolamine	1600	LC/MS Pos Early	1026	700	142.026	1071-23-4	1015	C00346	HMDB00224	11005912	10615437	9963578	6305978	28794666	6.14462e+06	8987553	7827789	12325654	780884	9267101	7670539	6.98707e+06	7.88293e+06	6362767	12581050	7422596	479291	7749456	8557389	6811882	4437221	24861108	16315736	8911659	10675172	1059597	ND	15221442	6938679	6985529	5942908	6018154	11766647	11946946	4538540	5135502	11876917
		trimethylamine N-oxide	40406	LC/MS Pos Early	100003397	2100	76.0757	1184-78-7	1145	C01104	HMDB00925	14324574	41370824	55598232	15524236	34148940	18776806	23687908	19817680	10252415	33277084	54688748	12110776	20548394	27387520	27208002	25188606	34639912	30345804	21284484	17674468	25586726	46037432	16309432	45608164	23717768	159188064	35565908	24611274	23562736	18771608	20437636	28553096	16169552	18460222	28466556	43437868	25921038	21999984
	Plasmalogen	1-(1-enyl-palmitoyl)-2-arachidonoyl-GPC (P-16:0/20:4)*	52689	LC/MS Pos Late	100009014	2154	766.575	-	-	-	-	35566032	32887194	35646128	37315360	41474616	25325796	27592180	28214316	42365456	25488348	41902528	35217048	34916440	24475210	28201908	31605216	26143138	21407064	34487036	40874864	39287832	33284836	32413950	29368776	29416096	28760198	20516902	38302120	24437678	24356356	31485184	22379012	36361176	24240848	24608356	21698116	28348086	40897044
		1-(1-enyl-palmitoyl)-2-arachidonoyl-GPE (P-16:0/20:4)*	52673	LC/MS Pos Late	100009002	2270	724.528	-	-	-	-	26515332	16051666	13585426	22226004	33047680	19290296	18516886	13098115	20359410	7.97595e+06	20793020	12927905	14729520	27366850	15725938	19706440	15618740	7483144	27384840	21355276	18518910	16287803	31089688	18588472	24433088	15642812	5979589	12041171	16154603	24174864	11187017	10160840	32400950	14981878	16407454	11257922	16647671	27439196
		1-(1-enyl-palmitoyl)-2-linoleoyl-GPC (P-16:0/18:2)*	52682	LC/MS Pos Late	100009009	2226	742.575	-	-	-	-	32525878	51791172	52989716	41491464	42068012	32453180	41977376	39908936	85393432	54496496	36061268	61101648	44970760	48450488	62690568	35916496	33735256	41565916	64749888	49570096	55848544	50927676	33174088	28513290	38272036	45020496	26727520	78420112	48332448	41045384	67842472	26264992	72270024	55122112	26037972	28676200	52573640	72012104
		1-(1-enyl-palmitoyl)-2-linoleoyl-GPE (P-16:0/18:2)*	52677	LC/MS Pos Late	100009069	2351	700.528	-	-	-	-	4060924	2827424	1.97218e+06	2636857	3489102	3518578	3.62304e+06	1436801	3618479	1624144	3.4056e+06	1966125	2624838	3955668	3.10059e+06	2694638	1867411	2089965	6007231	3.76182e+06	2905842	2.07728e+06	2760909	2240257	3704533	3.08283e+06	934642	2952842	1729413	3954707	2.04777e+06	1871005	4979112	2657411	2240003	1.80594e+06	3.0307e+06	5504304
		1-(1-enyl-palmitoyl)-2-oleoyl-GPC (P-16:0/18:1)*	52478	LC/MS Pos Late	100009007	2443	744.59	-	-	-	-	24158956	21158224	35949220	15540594	17020866	16452425	11782297	18405494	33443286	26633068	28095844	28350624	20240480	23944836	22562648	14643332	12789715	16451714	27772604	25398492	24473580	32364440	14980852	14314397	16605809	16652526	14559552	35095120	23253924	16102410	31404632	15828072	28801676	22438808	12311486	10348107	19248940	25835228
		1-(1-enyl-palmitoyl)-2-oleoyl-GPE (P-16:0/18:1)*	52477	LC/MS Pos Late	100009005	2600	702.543	-	-	-	-	4686736	2684856	2324234	3048975	4028684	2859314	2650653	2294473	2846334	2295911	3787709	2198925	3070069	3726506	3479244	3465652	1957543	1.94372e+06	5700200	3104703	2861752	2366455	7527300	2488462	3454199	2793074	1185168	2320320	2.67512e+06	2.81051e+06	2142965	1997057	3.84695e+06	2942521	2654109	1464128	2.69688e+06	5.79294e+06
		1-(1-enyl-palmitoyl)-2-palmitoleoyl-GPC (P-16:0/16:1)*	52713	LC/MS Pos Late	100009160	2218	716.559	-	-	-	-	1533889	1300700	2367023	1623164	1544519	1233925	1315600	1537737	2277813	1856747	1765962	2078379	1.81083e+06	1281786	2016133	998748	1341630	1349615	2236360	1816222	1663859	2297507	1483443	1132082	1.03884e+06	1.3505e+06	1116173	2275134	1476446	1228859	2025901	1.39713e+06	1419951	1919972	887456	975211	1596410	2056730
		1-(1-enyl-palmitoyl)-2-palmitoyl-GPC (P-16:0/16:0)*	52716	LC/MS Pos Late	100009162	2454	718.575	-	11146967	-	-	15672376	13242473	18344328	13889345	16473441	13482551	11218482	15362108	17677918	15337022	18143132	18260724	12299269	15668956	14616719	11102466	12103624	11055341	14511877	16765654	14045942	17475392	12623099	13691921	13029275	14588877	11548317	19514986	13429611	11265891	20733824	8774029	18465512	15171412	9890614	9786325	13261121	13525238
		1-(1-enyl-stearoyl)-2-arachidonoyl-GPE (P-18:0/20:4)*	52475	LC/MS Pos Late	100008999	2511	752.559	-	9547058	-	HMDB05779	57229820	49108008	45237916	54311088	85334752	45644376	35173912	24204954	56153552	23997056	50049836	50413344	45162144	46457944	31760880	48657568	39423016	19538404	54908888	60626360	50364168	44492684	74268528	52090848	63049428	42950296	10301115	44681808	43619512	40960832	38526184	25571758	67993920	35484800	35149168	29151846	35588528	73228448
		1-(1-enyl-stearoyl)-2-linoleoyl-GPE (P-18:0/18:2)*	52748	LC/MS Pos Late	100009225	2633	728.559	-	-	-	-	12932298	13438122	7313973	14431315	15650694	13635275	12800998	6337006	19277554	9461854	11312441	13233852	14460342	11712215	12732525	14035310	9277070	10162742	32217658	13273510	14447535	9620039	12415403	10904755	16829432	14217032	4224900	17984474	9602118	15297732	10909207	8885200	23337492	11841026	10533873	8647301	13314043	33855008
		1-(1-enyl-stearoyl)-2-oleoyl-GPE (P-18:0/18:1)	52614	LC/MS Pos Late	100008919	2950	730.575	144371-68-6	-	-	-	4998637	4841367	2806739	3.79059e+06	6619482	4060143	3342649	2888705	4120888	2609160	6016804	3.86787e+06	4263029	4770209	2789461	5918791	2404498	2626273	8201686	3561329	5055667	3224022	9926416	3670546	5784739	4013934	1300752	4767526	3557853	4477990	3262701	2373402	6210190	2912039	4574705	2180248	3.65142e+06	8695999
	Polyunsaturated Fatty Acid (n3 and n6)	adrenate (22:4n6)	32980	LC/MS Neg	100001193	5678	331.264	2091-25-0	5497181	C16527	HMDB02226	100401288	96946536	81653912	87748552	121891168	144078624	48047676	51636888	72248848	20533418	295444992	145814864	59276608	91127904	106363392	149449936	113462040	60455556	30050380	31462412	50364604	72160440	162037504	159969376	81843288	40556164	162673856	58133504	19440732	42689188	143858496	128243392	52347520	109678376	218243392	188420608	39494936	97647872
		arachidonate (20:4n6)	1110	LC/MS Neg	229	5535	303.233	506-32-1	444899	C00219	HMDB01043	428658176	309214688	372210016	425793760	415959136	300671040	267619488	191945216	367790400	366440736	322285888	511439008	476017312	317072288	295488864	296100896	388247840	182032144	275151616	232636816	329333536	369963264	404748288	356521824	352492352	270096608	328228672	564895296	195960992	169337024	453552416	672401472	307859008	401410080	292871264	309905632	220371712	294848544
		dihomo-linoleate (20:2n6)	17805	LC/MS Neg	1231	5730	307.264	2091-39-6	6439848	C16525	HMDB05060	87833104	75181168	107240672	84209144	105862240	131471416	69639816	74365280	57879792	27302374	47445376	128627664	46725984	109852888	107295136	96812528	106745120	42375480	38737708	32208138	53700360	85448424	167802976	143089600	118505136	45497880	164320624	60378584	18233192	52737000	177123440	98591176	100775312	114980048	162208976	167865312	36356680	129109648
		dihomo-linolenate (20:3n3 or n6)	35718	LC/MS Neg	100001739	5596	305.249	17046-59-2	5280581	C03242	HMDB02925	113283640	83807472	91163400	131468896	114156704	98801896	82275792	77967120	84591512	58895152	77300448	133011504	132376080	98548064	115533856	107792024	132792024	51072736	121814104	48880772	82171752	92602872	142358352	117442168	121468752	80322072	158518208	138173696	41917516	64469432	120167512	193414576	95432032	139516368	127460416	138829504	50912148	132501816
		docosadienoate (22:2n6)	32415	LC/MS Neg	100001182	6034	335.296	7370-49-2	5282807	C16533	HMDB61714	1.92775e+06	1684185	2983599	2254232	2930302	2.09494e+06	1390610	2182671	1459201	1095650	925946	3.49136e+06	1285700	2522831	2647774	1967181	2789338	871689	1256038	1337720	1499076	2308443	2889088	2735427	2886182	1321763	2814057	1561112	577236	2271153	4.03812e+06	2416497	3157892	2856990	3070212	3261226	1.01962e+06	3252481
		docosahexaenoate (DHA; 22:6n3)	44675	LC/MS Neg	100000665	5525	327.233	6217-54-5	445580	C06429	HMDB02183	326578304	216322096	380783264	272427200	324307872	552223744	160315136	180496496	271793984	210931536	232190640	294780800	206291744	715882112	186342464	139268656	238198432	39016148	80684544	101988128	239316544	351730816	256953760	311781504	705444992	163128816	317614304	420894400	100303880	185354992	266641920	284524192	488528800	224642224	165348128	190809488	48319280	146107952
		docosapentaenoate (n3 DPA; 22:5n3)	32504	LC/MS Neg	100001181	5571	329.249	2234-74-4	6441454	C16513	HMDB01976	113720064	60775672	154245120	116450576	167017584	170609568	58201788	55845440	85838952	70798224	73597392	188240000	65335936	190125632	114432784	74020560	139148704	29166732	31053446	35936520	68818184	135197664	148463104	166514352	236103392	54360740	145528016	139377488	34467040	36500436	196095024	102056608	137925904	143117632	106750656	162459840	29175238	111458520
		docosapentaenoate (n6 DPA; 22:5n6)	37478	LC/MS Neg	100001580	5624.5	329.249	25182-74-5	6441454	C16513	HMDB01976	30139328	26311948	24899756	39407000	36431212	34873216	21373776	16798924	19767384	11739170	32251756	44753816	41879328	42278700	17427860	36731764	44163136	14115252	20015996	14521901	26117748	26218006	38659976	39444396	37761424	19050508	33154328	31356688	8.23019e+06	14199061	37923764	65772020	27716612	23754648	41924512	35462272	15939885	28130152
		docosatrienoate (22:3n3)	32417	LC/MS Neg	100001195	5823	333.28	59708-86-0	5312556	C16534	HMDB02823	1172010	ND	ND	2254280	2.22718e+06	1297621	1.03718e+06	2374044	ND	501540	716232	1848639	926146	ND	1311216	ND	2191864	351963	835343	644979	1338538	ND	2878503	1800040	ND	1180211	3326911	783409	ND	ND	2120603	1516636	1.85342e+06	1308561	ND	2930056	ND	2.38191e+06
		docosatrienoate (22:3n6)*	57467	LC/MS Neg	100015762	5850	333.28	-	-	-	-	1654829	ND	ND	913030	251946	ND	97671.3	892423	ND	71554.4	ND	1603903	706884	ND	715072	ND	783593	ND	ND	788807	683891	ND	961129	915064	ND	ND	ND	553655	ND	ND	2008736	842618	494466	ND	1070178	ND	ND	1.08647e+06
		eicosapentaenoate (EPA; 20:5n3)	18467	LC/MS Neg	2050	5450	301.217	10-2005-9;10417-94-4	446284	C06428	HMDB01999	59372796	34945128	117306760	61444992	88812976	76625360	22166916	47969588	60285456	102410016	40648400	65290184	44702940	171389568	55038312	26407970	58496656	12682653	21432700	20546548	44829856	114073432	62826932	75340216	176268224	28557130	61223296	119541160	35671064	24858420	68980536	53910736	99876560	83346976	25448460	49874024	12318864	36722240
		linoleate (18:2n6)	1105	LC/MS Neg	180	5535	279.233	60-33-3	5280450	C01595	HMDB00673	3802884352	2959370240	4187173376	3914029824	5169259520	3562909184	3050718464	3580599296	3182035200	2585034240	2328683264	6520863232	3187328768	4199324416	4709700096	3316888832	5358618112	1770213760	2397179392	2607350528	3553883648	3710835200	4950740992	4425790464	5589161984	3133790976	4678370816	3748451072	1367204864	2930506240	6763681792	3483691264	4592811520	4830590976	4568078336	5826295808	1807373952	6847899136
		linolenate [alpha or gamma; (18:3n3 or 6)]	34035	LC/MS Neg	100001337	5450	277.217	-	5280934	C06426	HMDB03073	440351168	288648672	529426592	492836096	650802048	357418272	253148160	504086432	379372096	229428784	288313888	983180480	392129696	542943104	802778496	304411744	708253184	127970792	244509872	228243392	421838560	457355488	560530496	499225376	744302976	351903168	553246080	524018112	79946936	207445040	1064351040	356692448	713484544	818651968	416371488	812819968	135785376	1029626496
		stearidonate (18:4n3)	33969	LC/MS Neg	100001229	5395	275.202	111174-40-4	5312508	C16300	HMDB06547	6095440	3.83239e+06	9959779	7973197	6.34297e+06	9260454	2432266	7.86228e+06	5050688	7827481	4778214	9025911	7182811	15819682	8137523	4305843	6843793	2426114	2552890	1515070	4865636	7387790	12287271	7067270	23083856	2.74669e+06	7391194	7.65539e+06	1.83111e+06	2214535	14375077	5665363	8291568	7494984	3950316	11419549	2124293	8444050
	Primary Bile Acid Metabolism	chenodeoxycholate	1563	LC/MS Neg	1123	5264	391.285	474-24-9;474-25-9	10133	C02528	HMDB00518	5479872	3684627	1737325	2711961	1.81327e+06	3.96543e+06	7652505	7294026	1926570	25511154	3254262	891758	1.48563e+06	13068845	4466062	11412166	1544204	6.32961e+06	4573325	ND	9215918	ND	3.02766e+06	2168613	2001053	2423546	4385400	1685714	43554044	5443900	1.85689e+06	1.4297e+06	10079795	3.32251e+06	9991105	2005778	13422920	1681414
		cholate	22842	LC/MS Neg	136	5165	407.28	81-25-4	221493	C00695	HMDB00619	2774775	1023074	797347	222701	521717	1161409	1011194	1832530	277286	7621865	426022	499546	355296	6533579	289944	1394849	81239	389165	208814	99961	3281888	ND	ND	536847	235793	366877	565058	240003	16059743	1778866	279884	608866	515224	186737	2138174	274060	798664	221876
		glycochenodeoxycholate	32346	LC/MS Neg	1628	5236.1	448.307	16564-43-5	12544	C05466	HMDB00637	1222306	596282	1800984	1169355	8443966	25444058	11860332	20891664	2882317	11739382	3.57887e+06	14802466	26166000	43332824	2260743	24886820	970084	3.6e+06	64386464	348740	1035230	723702	1154416	31843932	29713578	12987819	16354151	2336716	24567016	12119129	18999292	16893150	15809277	3909376	19686520	3818101	4558241	9036248
		glycochenodeoxycholate glucuronide (1)	52983	LC/MS Neg	100009264	4806	311.666	-	-	-	-	308730	136548	436798	89332	505418	1123173	221075	908412	112645	296747	335776	2.05894e+06	2233157	396166	229131	243750	355326	215700	224231	162618	160722	295819	101555	738313	986680	104948	494558	68934	305266	212452	1760443	1694878	199998	ND	256817	372988	442319	55345
		glycochenodeoxycholate sulfate	52974	LC/MS Neg	100006641	4820	263.628	-	-	-	-	290193	ND	177519	229190	ND	963505	489602	1758539	77102	ND	46631	782633	781668	3936347	453229	2953814	ND	395781	2249936	55693	ND	220966	ND	623672	571737	757470	954891	ND	612475	1106200	1572491	565497	2239823	239880	2956332	565156	431067	3.07953e+06
		glycocholate	18476	LC/MS Neg	342	5163	464.302	475-31-0;863-57-0	10140	C01921	HMDB00138	222493	236967	413762	858740	1.80264e+06	8371208	2944426	4682816	173923	532013	850717	2920012	12135752	8822837	220034	6850880	584312	640775	20389242	ND	332296	386340	450340	9326837	21330628	3272923	9751851	497822	2162662	1426455	4920590	3074006	1790820	241607	4035659	2892673	1026240	2663742
		glycocholate glucuronide (1)	52977	LC/MS Neg	100009259	4533	640.334	-	-	-	-	ND	ND	37214	ND	81032	44968	44155	68945	189807	ND	ND	890701	193223	32651	28963	ND	ND	ND	ND	331303	ND	36551	ND	366054	105849	28973	69541	28141	ND	135370	623110	567645	ND	63105	ND	ND	ND	ND
		tauro-beta-muricholate	33983	LC/MS Neg	100001250	4774	514.284	25696-60-0	168408	-	HMDB00932	53613	ND	ND	ND	394232	ND	57271	34966	ND	ND	ND	1371234	123287	563105	ND	ND	ND	ND	159018	ND	ND	ND	ND	608863	24087	124638	ND	ND	ND	33242	999522	48730	156440	ND	ND	ND	ND	ND
		taurochenodeoxycholate	18494	LC/MS Neg	1629	5250	498.289	6009-98-9	387316	C05465	HMDB00951	43533	ND	72290	195005	458134	2120198	1.02325e+06	2959390	127384	148308	885819	1040608	2501777	4376656	258647	1642007	236061	111067	5481207	ND	ND	ND	246156	1828107	3415329	2228712	2655620	190135	279070	1094954	1645403	503031	1146786	245496	943443	453680	159448	956996
		taurocholate	18497	LC/MS Neg	1648	5150	514.284	145-42-6	6675	C05122	HMDB00036	ND	ND	ND	204592	242147	1561888	291474	1701709	ND	ND	84373	316330	2168349	1061318	ND	794225	127834	ND	2663603	ND	ND	ND	110078	978537	4348843	660050	3037508	47592	ND	247665	989119	200737	200495	ND	480948	564262	ND	342168
	Secondary Bile Acid Metabolism	3b-hydroxy-5-cholenoic acid	43507	LC/MS Neg	100004182	5205	373.275	5255-17-4	92997	-	HMDB00308	129233	71839	61326	76230	64195	ND	92739	74195	111429	ND	159308	325683	ND	120657	105605	ND	ND	ND	ND	259347	77482	59927	76329	139175	ND	83024	ND	140646	ND	150137	170359	ND	105900	108077	36962	ND	81410	104241
		7-ketodeoxycholate	31904	LC/MS Neg	100001063	4821	405.265	911-40-0	188292	-	HMDB00391	209462	131602	ND	ND	29446	388359	ND	104024	ND	969858	26228	ND	ND	111459	ND	75742	ND	ND	52539	ND	393721	ND	ND	25907	89008	28037	28825	ND	622586	56300	ND	ND	ND	ND	124298	ND	ND	ND
		deoxycholate	1114	LC/MS Neg	302	5294	391.285	83-44-3	222528	C04483	HMDB00626	9572122	4889806	6529633	2776672	11621827	26406400	7377414	8499391	5026148	7.38669e+06	15164081	8270293	22494350	5637885	5019263	541891	8472796	12733677	7.49222e+06	11650522	5951952	3157303	6.26543e+06	14569115	15784834	2495606	3731756	6.02018e+06	13351718	5823503	6128238	16109415	4147251	2583451	371642	8799366	23936640	2.01064e+06
		glycocholenate sulfate*	32599	LC/MS Neg	100001989	4750	254.623	-	-	-	-	10955360	8475021	8669058	3.5641e+06	2346895	3950368	7523200	9027361	4326604	3863409	16243106	12936962	10191792	7.39819e+06	6059487	5729075	7188875	3.63602e+06	5438320	5.56878e+06	4857919	7.76755e+06	3736558	2035300	4098555	6004694	5102396	2726616	3243869	4902444	11352632	6.96934e+06	3939284	4574498	5322192	6003475	5303844	5640212
		glycodeoxycholate	18477	LC/MS Neg	100000436	5281	448.307	360-65-6	3035026	C05464	HMDB00631	1176831	611117	2603712	1034731	14252713	24460168	6118647	8542451	2138792	ND	3.15958e+06	25617002	57571776	14387063	1.03135e+06	ND	2045659	4641394	53905580	673187	744432	936462	1152693	80102256	54503656	4281773	9221264	3016743	ND	5254968	21949776	30977432	ND	1099452	ND	6003681	7385904	ND
		glycodeoxycholate sulfate	52975	LC/MS Neg	100006642	4875	263.628	-	-	-	-	678808	ND	897280	649717	1235274	1958130	746318	2581876	303540	ND	345933	6105052	7.34057e+06	4707891	683339	ND	523416	896517	2392335	285814	52249	657833	483547	2165397	2156522	683699	1278480	153840	160419	1338245	8263162	5942518	3.78059e+06	153159	ND	939676	1452105	ND
		glycohyocholate	42574	LC/MS Neg	100004083	5020	464.302	-	-	-	-	ND	ND	ND	ND	85700	70282	190642	64373	23289	ND	ND	362620	172447	1.41083e+06	36641	406751	ND	52233	741791	ND	ND	ND	ND	124806	77960	212342	88561	ND	76099	126298	279798	96300	508116	ND	237592	79304	128379	330723
		glycolithocholate	31912	LC/MS Neg	100001064	5357.1	432.312	474-74-8	115245	C15557	HMDB00698	109390	ND	ND	ND	623629	600187	195497	396968	273009	ND	ND	1412291	1696126	123218	ND	ND	63903	190543	904700	ND	ND	ND	ND	1674706	2036740	338504	240421	262191	158856	420491	1371841	2857948	ND	ND	ND	ND	ND	ND
		glycolithocholate sulfate*	32620	LC/MS Neg	100001657	5011	255.631	15324-64-8	72222	C11301	HMDB02639	5064451	1705172	7218885	2642466	6991651	8.16946e+06	6617484	7107534	3.96506e+06	634208	3.78837e+06	23723464	20987506	6451768	1632506	233059	3.46478e+06	2194162	5053649	5060770	738628	4016106	3324461	12106985	17082998	5201892	6413810	2970511	1375780	3.75297e+06	31087678	17431316	5198734	1385993	250435	5428683	2289280	1339939
		glycoursodeoxycholate	39379	LC/MS Neg	100002911	5033	448.307	64480-66-6	12310288	-	HMDB00708	208041	349658	175685	79871	1157312	1366097	1332898	894128	572751	1348411	503562	2201763	6.26061e+06	9951279	603291	3275788	225691	2664204	30240968	113359	434550	31915	103996	4305206	1571710	859408	1189970	656532	9942505	179031	2756158	2809581	3983300	550802	3225001	467196	6612921	4963055
		hyocholate	34093	LC/MS Neg	100001279	5046	407.28	547-75-1	92805	C17649	HMDB00760	150667	197747	103448	98331	127450	473404	182640	218093	106549	287744	120053	263046	114061	893917	250761	216215	74476	203200	179599	146694	234943	ND	ND	170281	224748	126751	ND	95962	308549	237421	276459	76164	271523	110410	209451	99698	396873	171572
		isoursodeoxycholate	57577	LC/MS Neg	100002488	4809	391.285	78919-26-3	127601	C17662	HMDB00686	1743143	2978683	558176	665326	1386037	11806464	822437	1097863	3.12429e+06	17285948	1360219	2306649	3071495	2104600	6970593	955789	1536589	9146568	11487089	1.89283e+06	1357897	358911	1368753	2446531	4408841	531167	466529	2440430	46380700	399252	2145545	1397820	3232050	2834980	1169417	1425567	18170744	10662263
		taurocholenate sulfate	32807	LC/MS Neg	100001990	4750	279.614	-	-	-	-	1525721	1116989	1468218	1858107	750172	553526	1573258	1757152	996543	118705	2449390	2628245	2157377	2962415	967697	887939	1929535	437576	760498	525724	508695	841958	2114194	472070	592513	2735340	1532115	486987	82192	1646380	2529275	1203379	2760748	1487795	1001222	1364043	352480	869223
		taurodeoxycholate	12261	LC/MS Neg	1668	5257.4	498.289	207737-97-1	2733768	C05463	HMDB00896	82165	ND	142202	337625	1253276	2330741	807543	1603716	147219	ND	609549	2410824	7.86533e+06	2.06033e+06	143502	ND	604493	189301	7.26007e+06	ND	ND	97983	298830	7.48688e+06	6900994	980034	1.98857e+06	434694	ND	1024262	2472129	2059445	451791	109143	ND	1356391	328990	ND
		taurolithocholate 3-sulfate	36850	LC/MS Neg	100001658	5026.7	280.622	64936-83-0	440071	C03642	HMDB02580	1058937	105780	778933	1448408	1396718	640101	1457442	882788	735466	ND	513655	3.51983e+06	2905619	1903853	223290	ND	718355	145346	732744	309996	ND	506449	986067	1398501	1355060	1577386	1174532	495544	ND	1.53188e+06	3.58299e+06	1737520	1575112	299805	ND	1052538	124274	172062
		tauroursodeoxycholate	39378	LC/MS Neg	100002912	5025	498.289	14605-22-2	9848818	-	HMDB00874	ND	ND	ND	ND	ND	ND	ND	ND	ND	ND	ND	44258	226643	304314	ND	59363	ND	ND	899281	ND	ND	ND	ND	116410	53582	28686	78901	ND	ND	ND	73093	38595	90064	ND	27282	18179	37727	87984
		ursodeoxycholate	1605	LC/MS Neg	1135	5055	391.285	128-13-2	31401	C07880	HMDB00946	579342	621124	918852	ND	988002	645978	923474	1038187	ND	3942620	ND	ND	1486179	2036782	1.00098e+06	1507257	290139	3498194	2318368	1521864	1144992	ND	ND	793119	355089	233497	190942	ND	26948828	89794	ND	496682	992869	329626	2527864	124713	9355356	1459195
	Short Chain Fatty Acid	valerate	33443	LC/MS Neg	1136	1718	101.061	109-52-4	7991	C00803	HMDB00892	ND	ND	ND	ND	ND	ND	ND	ND	ND	1.71617e+06	ND	ND	ND	ND	ND	ND	1439432	2299879	ND	ND	ND	ND	ND	ND	ND	ND	1790634	ND	1765439	ND	ND	ND	ND	ND	ND	1397723	ND	ND
	Sphingolipid Metabolism	behenoyl dihydrosphingomyelin (d18:0/22:0)*	57331	LC/MS Pos Late	100009026	3150	789.684	-	-	-	-	7982084	3490229	6128329	10522194	16611040	7297659	3.19969e+06	1538513	5065012	2260941	5257347	7165837	11272758	5677178	8601494	6834245	11874472	1878350	6079021	5891135	5196184	4562327	13216054	6785153	12589775	5884662	1.41863e+06	2998132	2759482	4.01133e+06	5731000	4829301	7.60829e+06	11687726	4435778	6863851	4441215	7605461
		behenoyl sphingomyelin (d18:1/22:0)*	48492	LC/MS Pos Late	100006294	3083	787.669	-	-	-	-	1028786368	1260731136	1045203008	1582195584	1672436480	1356899968	1217851264	992884160	1576435712	903998592	1160651776	1481159680	1754780672	1121077760	1392418304	1698819200	1260901376	908493696	1504693632	1182611968	1250341248	930392192	1472784384	1444827776	1484282368	1443094656	907352448	1333090688	1094167168	1341500032	1301723008	1333764736	1365054848	1500174464	1579004416	1144999040	1106751104	1529703936
		glycosyl-N-behenoyl-sphingadienine (d18:2/22:0)*	57421	LC/MS Pos Late	100015625	3420	782.65	-	-	-	-	2167016	1869344	1185415	2466197	1933561	1507239	1419996	1468257	4060696	1.96691e+06	1419774	3065041	2667761	2356048	2604560	2.06699e+06	1680363	660585	2359588	1.83192e+06	1.98717e+06	1242114	2434213	2.06958e+06	1584509	2002712	1305781	3020181	1.86245e+06	1753605	2765471	1707648	2332870	2364433	1802039	1736749	1556298	2667578
		glycosyl-N-nervonoyl-sphingosine (d18:1/24:1)*	57369	LC/MS Pos Late	100001878	3990	810.682	-	-	-	-	11170191	7.23564e+06	5579850	8037876	5758704	5835417	4349400	7024643	16739975	9325213	7072433	8721999	10544057	16427371	16277664	6844919	4984212	4376320	7224766	5804928	7453419	6514013	9124907	9007429	4634420	6050403	5685391	10854151	9094840	9640684	8497769	8946440	12170094	14554332	6765949	6464714	8509464	7.97794e+06
		glycosyl-N-palmitoyl-sphingosine (d18:1/16:0)	53013	LC/MS Pos Late	100009272	2623	700.572	-	-	-	-	10062427	7542589	5748329	8066363	8358578	7633665	7888449	9398358	10104459	8246171	7807431	7643962	7751752	11803703	10830640	8927463	7606578	5905029	6594103	7997492	5953532	6113775	8730282	9356745	6862717	8435443	8232560	7887193	8698697	9772507	7938958	7454844	10194761	10153120	8904645	8705662	8399546	7166508
		glycosyl-N-stearoyl-sphingosine (d18:1/18:0)	52234	LC/MS Pos Late	100001882	3053	728.604	-	-	-	-	2713426	2398954	718364	2369091	1.94342e+06	2344476	874839	1492542	4012076	1179320	1669687	2529571	2114502	2907401	2366636	2454225	1470303	850037	1728435	834382	1442300	887842	2986180	2369640	2007324	1000692	1366508	2271213	1.70507e+06	2439604	2181109	1.59457e+06	3.14952e+06	2480739	2298566	2320709	1713424	1.81906e+06
		lactosyl-N-nervonoyl-sphingosine (d18:1/24:1)*	57370	LC/MS Pos Late	100015620	3778	972.735	-	-	-	-	1749278	2305757	1698916	1925504	2926838	979381	1698414	1623797	4.02699e+06	2133583	1408947	2461337	1837516	1965885	4266519	1576818	1216270	923362	1859195	1676841	2289197	1603716	5030747	2.06433e+06	899325	2149161	1285974	2860587	2762314	1.93943e+06	2199513	1244279	1871884	3861757	1469749	1080885	1545844	1964432
		lactosyl-N-palmitoyl-sphingosine (d18:1/16:0)	53010	LC/MS Pos Late	100009030	2527	862.625	4201-62-1	-	-	-	10447618	10635232	10219340	14423300	13142816	6204525	10154014	9153731	12910662	13187809	11811625	15749958	14211387	11014380	17804720	8777990	10381847	7091933	11121083	14397820	14074177	10188254	14893310	10424514	6.46961e+06	13990750	8535346	13455021	12838026	11994973	14068688	9444509	12493051	17724088	9375821	7.63046e+06	8570616	11937675
		lignoceroyl sphingomyelin (d18:1/24:0)	57330	LC/MS Pos Late	100006298	3437	815.7	60037-60-7	-	-	-	251000992	227697872	198457680	289660896	314848992	251663424	203223328	118315936	360402176	124500160	215666656	313296768	364182720	221619808	466349920	275436864	204821504	171756320	297705024	216850640	272196352	148349504	384413408	259360432	237220800	227228368	112620784	217906496	171385296	321489120	250076960	232048640	240275968	509781120	215696096	161823712	230643408	283768032
		myristoyl dihydrosphingomyelin (d18:0/14:0)*	57365	LC/MS Pos Late	100009038	2060	677.559	-	-	-	-	5144021	4101446	5037367	5499056	4662552	4100986	3104768	2350948	4965833	3.21925e+06	6432441	7018804	6708405	4090633	7167928	4408376	5418576	2595119	3958782	3623975	6824536	4214743	3864006	3606841	5223002	4227755	2272652	6.11591e+06	3727499	3761151	7.02726e+06	4608288	6015834	7398543	4525613	4269672	3038668	5154019
		N-behenoyl-sphingadienine (d18:2/22:0)*	57372	LC/MS Pos Late	100015624	3911	620.598	-	-	-	-	15872819	20821478	11072118	23124352	16933016	9221718	19670944	19275228	30648098	16361001	8773217	15571067	23918816	10857043	21128570	22024724	13657255	13025018	29663360	23118954	22870788	11425428	27578472	20627486	16792994	22424456	18283180	20560402	22052226	7918410	13723778	14931335	12814118	20401296	19663976	16276278	16441741	31188744
		N-nervonoyl-hexadecasphingosine (d16:1/24:1)*	57435	LC/MS Pos Late	100015725	3850	620.598	-	-	-	-	4907653	4.81483e+06	6580026	7310042	4656389	2.17344e+06	3584636	6334226	8486129	3463182	3310539	4395132	5377487	5.32071e+06	6465960	8079681	4203485	2.8203e+06	7508141	5418283	6815151	7021323	9125295	6.70471e+06	4908683	5557180	6332919	7892422	4802121	3288553	5441629	5.10514e+06	6386142	5.79984e+06	6865556	4.24523e+06	4.37925e+06	10759562
		N-palmitoyl-sphingadienine (d18:2/16:0)*	57416	LC/MS Pos Late	100015609	2490	536.504	-	-	-	-	3467876	4453601	3.31628e+06	5431417	3.84978e+06	2200768	3013522	2969511	4461712	2650100	2992860	3.7931e+06	4537322	2423343	4312664	3880140	3420420	2106446	6506836	2906689	5428873	2899973	4526846	3561040	2589032	3859083	2900215	4.15475e+06	3014249	2850071	4.13814e+06	3648842	3.93565e+06	4526503	3909408	3.26625e+06	2876974	8.11309e+06
		N-palmitoyl-sphinganine (d18:0/16:0)	52604	LC/MS Pos Late	100009028	3090	540.535	5966-29-0	5283572	-	HMDB11760	3194065	1883895	2024600	2987925	3957173	2651733	2469335	2004658	3009285	901810	2367160	1875380	3016570	2872317	3313634	3573658	2376613	1009515	2722754	1785300	2102011	1498266	4153480	2859174	2782642	2506449	1865612	2020711	1709857	2281952	1571767	2576205	3470976	3216437	3697951	2901358	2.06976e+06	3166559
		N-palmitoyl-sphingosine (d18:1/16:0)	44877	LC/MS Pos Late	1518	2893	538.519	24696-26-2	5283564	-	HMDB04949	13830011	15266927	16277608	26342792	25837936	9296565	11644271	14820132	15551651	13999066	16889418	19111220	20852162	10603264	14862881	17357532	16880912	6785772	28495364	19672818	23884366	14025998	20489860	13592760	19219932	23238504	12370548	19290960	10864780	12018676	17944670	12147020	24462906	13846527	18599484	10938321	9644030	33619488
		N-stearoyl-sphingosine (d18:1/18:0)*	54979	LC/MS Pos Late	1547	3392	566.551	104404-17-3	5283565	-	HMDB04950	13220419	10035193	11753228	16958576	11945909	7430366	6467553	13647542	15342322	5870528	8141938	7.37681e+06	10054013	6055399	11815087	11428357	10908012	3896268	16594854	9885902	9675096	10810857	18652612	10844296	12676160	9661058	12623426	11330392	9403042	6443622	8500872	8801074	9338111	10505652	12351221	12060599	7049071	19450368
		palmitoyl dihydrosphingomyelin (d18:0/16:0)*	52434	LC/MS Pos Late	100008954	2290	705.591	-	9939965	-	-	68169056	61583536	66731628	65645832	78461960	65976196	47299012	39497604	71681272	65023272	85054384	70710568	63894360	82122752	94138224	47046700	71988288	41964464	56496012	61017528	84581768	59911088	54936440	60436156	79692784	58123876	36039744	70990368	57595368	58566240	69776784	40589232	79309000	87746856	45467516	51865764	48751996	65613616
		palmitoyl sphingomyelin (d18:1/16:0)	37506	LC/MS Pos Late	100002107	2168	703.575	6254-89-3	9939941	-	-	498188096	531751136	430294368	480797024	510502976	433815520	391654976	400564256	603817984	475393248	516348256	575266496	509641952	501223968	610220416	473169728	452925856	354463232	559336512	433251136	573705152	429203712	429347840	475552384	482297120	493651360	375786112	551469824	453411008	545155584	517852352	388655840	531785152	581921664	433909088	386624640	394865152	578031360
		sphinganine	17769	LC/MS Pos Late	313	1413	302.305	3102-56-5	3126	C00836	HMDB00269	2021662	1322676	1092154	924670	3962882	892111	1029102	1028575	1.84305e+06	299481	1373591	714762	751093	1090460	910634	1529527	714289	211851	794850	950761	893986	516799	2218445	1.86391e+06	1009116	1310715	667914	445880	1129248	1206748	537064	615829	750557	1.43415e+06	922258	692922	450530	992832
		sphinganine-1-phosphate	52605	LC/MS Pos Late	100001876	1431	382.272	19794-97-9	520	-	HMDB01383	1065349	1077117	710474	898678	2633393	981999	1046482	879523	1706882	503503	1096885	921220	728833	780112	974592	1338994	878677	333283	644395	799665	1.02625e+06	516014	1647130	1759607	1074897	1181220	922159	643391	1.0216e+06	1169044	774661	523514	786116	1431778	995897	601432	456006	836573
		sphingomyelin (d17:2/16:0, d18:2/15:0)*	57483	LC/MS Pos Late	100015793	1837	687.544	-	-	-	-	2476247	3321464	1758864	3197804	2432605	2550970	1049155	1413030	5612215	1867078	2152204	2686390	5499411	2370480	2990820	2664094	2172939	689659	4924601	1315039	4304448	1836132	3142842	2570659	2485930	1224854	1562646	4163330	2250859	2481230	2309606	4727993	2357032	2976468	2163225	2237795	1110076	5379878
		sphingomyelin (d18:0/18:0, d19:0/17:0)*	57473	LC/MS Pos Late	100009027	2362	733.622	-	-	-	-	34179008	17999816	32485462	33070978	33934840	49183956	11118772	16170322	24516246	6.44156e+06	25546160	19123316	23778652	23531962	32052652	31622620	43864208	6362032	17090932	9415678	15354346	25676344	37187992	29361868	44093464	11400912	16499486	13875356	12368392	27406868	17884590	24403266	22124196	32849800	31408346	43596844	13916565	24993776
		sphingomyelin (d18:0/20:0, d16:0/22:0)*	57476	LC/MS Pos Late	100015786	2600	761.653	-	-	-	-	10323450	5872389	6955558	10885428	13929625	16433093	5436422	4896772	8.21939e+06	2109174	6578118	8415633	15171553	8860782	13787820	11712998	12414865	3257583	6276107	4038760	5902484	5248379	14185632	11098917	15609844	5474422	4.07884e+06	3783863	4459131	8778117	6820520	10818380	6997100	16580591	10347389	12082006	4763982	8.05527e+06
		sphingomyelin (d18:1/14:0, d16:1/16:0)*	42463	LC/MS Pos Late	100004328	1998	675.544	-	11433862	-	-	128394320	139516464	113728096	140521936	131628808	123059032	98919200	119787392	184737696	87145408	119078920	176522736	149560416	112694816	159061200	164344624	121997504	71668856	158222880	106476664	141178384	113528584	149724400	138378544	121267248	112478976	118276944	161555344	105803920	146579760	156336272	127824432	134255920	157355408	158195056	118925264	82321488	163636160
		sphingomyelin (d18:1/15:0, d16:1/17:0)*	52433	LC/MS Pos Late	100006314	2082	689.559	121999-58-4	-	-	-	51259104	70634160	71987984	69096160	70297072	40877548	44287928	49650112	91687056	62624912	61174464	103413984	80953416	49515788	80082672	80953552	67992392	39237464	89347400	60880140	84101088	70840136	60524824	55649480	49535584	60243424	44775948	99281992	59160156	54843848	94003224	61761552	70717272	75078368	72605008	54917384	47280304	101221824
		sphingomyelin (d18:1/17:0, d17:1/18:0, d19:1/16:0)	52615	LC/MS Pos Late	100008920	2312	717.591	121999-64-2	-	-	-	32539134	36865780	43698316	34750096	33925720	29985328	16777280	25403860	46796460	33604776	39193860	37229592	30011604	32183872	33401022	29817760	34920176	17266314	26994560	27783196	40045800	41566616	27594088	28344070	36868496	26375832	23983660	47960912	35037032	30187812	38406200	28467858	37962716	32576064	28031320	27848668	18991774	34790016
		sphingomyelin (d18:1/18:1, d18:2/18:0)	37529	LC/MS Pos Late	100002106	2167	729.591	108392-10-5	6443882	-	-	52104568	49772988	50307444	52655464	44324980	47161348	23844192	34524076	56310216	45713624	60638536	48138976	41487272	29768670	48101264	37532976	56836232	24282100	57581308	28926602	52593016	48159876	41910448	42943144	55411140	36620924	37166068	55812892	41470612	52155576	50532752	40282980	37070068	45955800	36313112	48971140	30245416	65597256
		sphingomyelin (d18:1/19:0, d19:1/18:0)*	57475	LC/MS Pos Late	100015787	2330	745.622	-	-	-	-	36160052	34747644	40105456	38442484	33816520	37235932	13046004	30093364	47693352	24748298	37583608	36379368	42084080	22922798	31636834	30500606	37434728	9485921	30875264	26325888	37550504	39662360	35914032	27264954	42839820	22725956	27677784	42489440	27499880	28360910	36374764	36890360	29111496	30526210	30068232	31548002	12312863	38346428
		sphingomyelin (d18:1/20:0, d16:1/22:0)*	48490	LC/MS Pos Late	100006290	2685	759.638	-	-	-	-	193930640	167453456	155808528	163922080	177497712	211193744	146893776	172661728	232947424	116428944	159308784	172738528	165858464	133292120	197450160	167888624	141429296	107296120	131005360	165576240	148455680	136741296	180079824	176312320	181962480	144395616	166098576	165755952	147709824	158799136	162340272	157485072	117156152	200706752	173510544	149556416	108009832	144780288
		sphingomyelin (d18:1/20:1, d18:2/20:0)*	48491	LC/MS Pos Late	100006292	2383	757.622	222403-67-0	-	-	-	30111848	28416598	22026612	20607348	19857388	24545378	15026997	18130630	33348556	19823256	28719372	24676904	23112330	16564358	26755140	17152868	20968590	12781162	24150360	15334962	28451896	21722216	20830048	20044696	24104196	17272492	17824278	28374610	22321820	22755750	23897728	22718108	14590068	25301520	17078132	20722660	14841581	26880952
		sphingomyelin (d18:1/20:2, d18:2/20:1, d16:1/22:2)*	57481	LC/MS Pos Late	100006293	2039	755.606	-	-	-	-	2051889	1326035	2544486	1496289	1215058	1123258	687261	920506	2.00428e+06	1537284	2135161	1754781	1.43806e+06	840198	1924144	726652	1640676	534552	1487154	1144219	1.92189e+06	2454801	912619	988635	1345914	1.46606e+06	1149858	2.05814e+06	971565	1228357	1.78199e+06	1.57237e+06	1301639	1544934	868153	1203695	673935	2741499
		sphingomyelin (d18:1/21:0, d17:1/22:0, d16:1/23:0)*	52495	LC/MS Pos Late	100009025	2793	773.653	-	-	-	-	104306176	114781200	106564952	124612016	122327976	107389520	50812344	81639032	178951248	67163248	91080304	151049008	178007408	84553424	152202256	131394344	94444456	37932180	136824560	76850160	128616368	91786040	139897712	116478976	109536872	78790112	73488808	135762288	85408136	111012792	130496904	148253248	99005656	160653920	114533488	91358864	52587952	138393392
		sphingomyelin (d18:1/22:1, d18:2/22:0, d16:1/24:1)*	48493	LC/MS Pos Late	100006295	2666	785.653	-	-	-	-	254327888	280071360	248041728	231394272	228332368	246206336	210925728	214385712	354165856	181455920	209275392	284381184	272313600	230515552	328313312	231620640	206403120	186159040	256446560	206884640	264829456	227276896	262652880	250197488	209644288	209231616	206199568	265585472	225853152	253741520	262598992	265912256	206188432	326199008	222530368	210415904	203947152	277205504
		sphingomyelin (d18:1/22:2, d18:2/22:1, d16:1/24:2)*	57477	LC/MS Pos Late	100006296	2209	783.637	-	-	-	-	10017613	10759215	16321573	12711028	11441266	8145545	6306781	9272363	15986376	9353627	12640309	15880371	15536801	10033640	14536817	7.79143e+06	13341425	5080478	14568766	6696555	16460934	16316851	9569049	8.32427e+06	9948748	10385237	9218483	18330814	7.94374e+06	12948097	16203646	12715779	12422597	12726800	7649081	8282008	6.94202e+06	18541000
		sphingomyelin (d18:1/24:1, d18:2/24:0)*	47153	LC/MS Pos Late	100005986	3033	813.684	94359-13-4	-	-	-	1888933760	1679224832	1251219328	1476697984	1135344640	1407329792	1084531712	1412598016	2092077440	1175976064	1294796544	1422232448	1475855232	1788236288	2040243840	1574468608	1091931776	1089678464	1586403200	1080739328	1531313024	1225745792	1887940096	1517540736	1135029632	1103909888	1233096832	1527139840	1392309760	1975318144	1350051840	1720292992	1486876544	2048761088	1423940864	1265000192	1499817472	1667028096
		sphingomyelin (d18:1/25:0, d19:0/24:1, d20:1/23:0, d19:1/24:0)*	57478	LC/MS Pos Late	100015792	3220	829.716	-	-	-	-	5.73969e+06	3423919	6258357	5808113	5452664	5354537	1.89825e+06	2866724	4830378	2446450	5191911	5146326	5588945	3914365	4586537	7044876	5101054	2786932	3626477	4188538	4632136	5390503	4291466	4324349	5660688	4717791	2904947	4420447	3027023	7228101	4416961	3074753	5674029	6494600	5710035	3838245	3626668	5587320
		sphingomyelin (d18:2/14:0, d18:1/14:1)*	47154	LC/MS Pos Late	100005985	1860	673.528	-	-	-	-	12275248	12455036	6682425	13391104	8849725	10706814	3462424	5492517	16204800	6102647	10404885	15600507	29729716	7246983	14845294	9037512	9183844	4405201	21404340	4427954	19895356	6245477	16847992	10169189	12718132	4163030	6300648	13204709	7894446	9763884	14145672	20430064	7522686	15655060	9553255	11223680	5964572	41451704
		sphingomyelin (d18:2/16:0, d18:1/16:1)*	42459	LC/MS Pos Late	100004329	2002	701.559	-	-	-	-	206134624	228350288	143139120	188193824	172383920	142870240	159703648	147363440	231058240	151738048	197929440	213421952	210790656	126695272	230518592	181396480	191506928	133123120	284606880	158683440	224433776	143447616	189920352	180859088	141801984	166472272	149124096	192784848	154055920	209315744	194016768	191932064	165699216	216411776	161759968	187979904	166349216	305418944
		sphingomyelin (d18:2/18:1)*	57474	LC/MS Pos Late	100015788	1904	727.575	-	-	-	-	12976157	11918828	10451148	9480939	8677689	6585809	5743361	5271027	12182300	8757260	12931340	11199984	10761340	5035536	10234812	7438513	10499720	6920204	9681776	6992644	12015652	9749575	7862877	6874996	6204834	8469798	5608671	11173904	8739826	9222162	12213331	11564270	8768191	8492227	7345971	8348730	8293398	18969708
		sphingomyelin (d18:2/21:0, d16:2/23:0)*	57480	LC/MS Pos Late	100015790	2330	771.637	-	-	-	-	21499528	21887616	19593618	19393598	15514473	15218456	7346498	13391608	25096528	14958520	19992584	21127872	30684926	10961952	20957968	12585772	19141248	5609591	25534472	11325983	26006944	18506492	18998976	14450493	15287987	11114427	12961667	22155164	15895156	13355517	19118404	29963342	12737068	20479628	12592916	15861105	7.64519e+06	29866226
		sphingomyelin (d18:2/23:0, d18:1/23:1, d17:1/24:1)*	52435	LC/MS Pos Late	100008956	2845	799.669	-	-	-	-	207753504	232857568	193638528	210449456	167144144	143869984	65782692	120912440	318546880	137893840	177408864	245838448	294817600	172612752	272673920	171339280	141905200	66384000	287158368	95354680	282230304	182716864	238331456	176034224	143351280	109447896	105168192	249580752	155735264	214026064	217424416	272011968	189948288	282744064	143225792	140222368	109560712	291664288
		sphingomyelin (d18:2/23:1)*	57482	LC/MS Pos Late	100015791	2315	797.653	-	-	-	-	19322668	22635600	26954940	23554416	17333388	14001884	6866181	14552341	29771924	14920004	21478968	22662152	34261976	17914192	22372932	12778930	18573528	6690254	25833940	10178203	31157626	28307360	20919904	14938411	16000348	12824732	13815201	28904580	14674873	18702456	22660052	29650806	20690544	20377510	12685775	13921682	10039219	31268424
		sphingomyelin (d18:2/24:1, d18:1/24:2)*	52437	LC/MS Pos Late	100008957	2635	811.669	-	-	-	-	372877888	346285504	301216544	300516992	241262672	253916784	192155488	257085632	403750560	245293984	314188512	296013312	321477088	303852064	416541280	230099472	235935344	201709072	326233184	192264768	367541024	299353536	329209760	268502368	225398992	227078704	242748048	333481728	264577216	359111488	288210400	335516384	281129184	391120384	215972784	229193920	275857408	367861600
		sphingomyelin (d18:2/24:2)*	57479	LC/MS Pos Late	100015789	2215	809.653	-	-	-	-	14033477	16536711	19067032	17890786	14615554	9549082	8851165	10091427	20843320	13867840	18631866	19719294	22719948	12554335	22934788	8.12615e+06	16649510	8.29715e+06	23665478	8497550	29076890	19744140	12587868	10852729	12442870	14524876	10727511	24294586	10907633	18271354	20134272	17834780	16361336	20504812	7920823	11085894	11484562	27666560
		sphingosine	17747	LC/MS Pos Late	297	1393	300.29	123-78-4	5353955	C00319	HMDB00252	4820133	3082319	3069319	1803088	10944897	1.80784e+06	2741236	3132074	4376417	695468	3050351	1364032	1347814	2198652	1790651	5497520	1884865	412701	2235445	2351291	1919657	1520805	5510061	4797686	2258874	3917870	1947660	677661	4586773	2289536	1.01156e+06	1197399	1617943	3601198	2851570	1489701	1077446	3028492
		sphingosine 1-phosphate	34445	LC/MS Polar	100000626	1850	378.241	26993-30-6	5283560	C06124	HMDB00277	1015846	1197674	1.04702e+06	948134	2492209	980339	1232350	1236977	1406006	687510	1035217	757290	823636	923233	902465	1610784	965993	539956	692156	752959	956421	773585	1245040	1393667	924168	1372505	808537	679549	1350137	948045	907896	609661	815064	1174318	1382882	715962	574012	931530
		stearoyl sphingomyelin (d18:1/18:0)	19503	LC/MS Pos Late	1538	2400	731.606	85187-10-6;85187-10-6	6453725	C00550	HMDB01348	94841960	89008880	83884512	84465984	78440000	98929744	47408100	76686088	110325648	58044520	93112912	80164320	66917684	69175480	94922240	74955376	84353392	37485380	66969008	53719364	81035984	81498464	79228000	80127408	96285176	55637420	78518992	97235824	69095664	90698944	82819720	75467984	65592748	91598256	78198376	85153736	48314324	77417408
		tricosanoyl sphingomyelin (d18:1/23:0)*	52436	LC/MS Pos Late	100008955	3200	801.684	-	-	-	-	165784432	177196176	152999360	225929808	196962016	148951680	74427432	89695464	250121760	100735208	157656224	226566208	286134176	144937456	284338976	173374480	137535408	68443712	235763840	93053472	211932768	128273936	201755968	172417136	154280544	119157936	85927024	180661984	117065632	197356912	194809824	219419904	190374304	243328240	150562736	106167800	85225336	236768112
	Steroid	16a-hydroxy DHEA 3-sulfate	38168	LC/MS Neg	100002126	4240	383.153	-	-	-	-	1222701	1878907	212573	2178775	3469466	4424451	2.00158e+06	5043987	201813	1597923	1396506	7824261	600568	1293345	1249286	3010238	933140	1378858	306721	2295954	2.0349e+06	174053	1956849	2387080	4585752	2766358	1.86059e+06	155093	2224297	4355445	8.10134e+06	346115	1435633	1522567	3.44959e+06	836121	2157972	1293845
		17alpha-hydroxypregnenolone 3-sulfate	37482	LC/MS Neg	100002128	4800	411.185	28901-70-4	152971	-	HMDB00416	34244	53500	ND	ND	54592	84448	20978	ND	ND	32796	ND	93384	ND	ND	ND	133491	ND	218462	ND	ND	45579	ND	ND	ND	44811	ND	ND	ND	ND	86908	60270	53260	44736	ND	132826	ND	86981	ND
		21-hydroxypregnenolone disulfate	46115	LC/MS Neg	100001999	3935	245.067	1164-98-3	134595	C05485	HMDB04026	467165	1135061	440690	263620	381559	1087486	886432	1320254	280120	1535621	131493	1531580	274824	779679	423127	1491858	696342	2033394	114108	950857	747020	287374	437198	302789	788287	1025180	815444	152231	1391379	1901981	1.56464e+06	147935	757219	473263	1184242	378904	1077538	124429
		5alpha-androstan-3alpha,17beta-diol disulfate	37184	LC/MS Neg	100002017	4275	225.07	-	-	-	-	25242	ND	ND	180355	1294867	ND	883987	311788	ND	ND	ND	ND	84797	ND	83678	1.96888e+06	155243	455526	ND	1277830	ND	672022	ND	987164	110641	849533	164787	ND	ND	942218	ND	ND	ND	124606	1216112	ND	890368	ND
		5alpha-androstan-3alpha,17beta-diol monosulfate (1)	37186	LC/MS Neg	100002018	4925	371.19	-	-	-	-	61610	350170	1363286	935816	90903	586487	495070	446809	42287	483055	ND	61369	126550	247020	391553	282086	405681	678667	41042	99128	338203	1167501	450661	90885	492748	369686	265279	49978	443947	791670	41533	98632	206205	448503	308418	296489	1198970	114438
		5alpha-androstan-3alpha,17beta-diol monosulfate (2)	37185	LC/MS Neg	100006005	5080	371.19	-	-	-	-	ND	ND	877201	176327	8459849	ND	1964320	147994	ND	ND	ND	ND	ND	ND	ND	4089905	ND	878185	ND	2677404	ND	650417	227032	7.5147e+06	ND	1721953	ND	ND	ND	651862	ND	ND	ND	ND	4618036	ND	1065458	ND
		5alpha-androstan-3beta,17alpha-diol disulfate	37187	LC/MS Neg	100002021	4215	225.07	-	-	-	-	291089	ND	446252	291458	419451	215670	263407	1287950	171757	183746	219632	788188	40497	ND	135965	150850	282762	245718	ND	1218820	94879	446091	ND	81924	247752	275633	321527	144654	189066	1.71635e+06	887397	ND	ND	98586	147264	117932	201831	ND
		5alpha-androstan-3beta,17beta-diol disulfate	37190	LC/MS Neg	100001987	3880	225.07	571-20-0	242332	C12525	HMDB00493	782066	3617947	12060032	3643213	8248488	4709667	9398645	8466283	200562	3607388	480048	549797	1841876	1525032	3159002	10542905	4035738	5282189	412349	7126367	3379061	10851741	2137850	5138943	3596720	7313794	3237698	75260	3638870	9173622	490108	1451536	1274973	2773152	11061775	2406605	6442168	757452
		5alpha-androstan-3beta,17beta-diol monosulfate (2)	37192	LC/MS Neg	100002024	4685	371.19	-	-	-	-	ND	115433	623726	446242	48020	180031	241081	185697	25827	202424	ND	ND	38446	74368	115785	100081	119986	215321	ND	59194	151360	615593	204431	37505	173998	183602	106808	ND	260360	456360	ND	37775	60099	112193	122136	106011	459601	ND
		5alpha-pregnan-3(alpha or beta),20beta-diol disulfate	46172	LC/MS Neg	100002015	4310	239.085	-	5127902	-	-	ND	74317	ND	2480377	35244	152041	62401	107463	ND	ND	ND	66399	25852	406279	ND	124866	ND	173482	ND	ND	ND	ND	11764275	ND	91697	71468	ND	ND	239884	186350	53303	ND	184818	ND	126514	ND	256008	ND
		5alpha-pregnan-3beta,20alpha-diol disulfate	37198	LC/MS Neg	100001988	3962	239.085	-	-	-	-	1205478	1323198	908752	38424960	1124286	2425824	788985	1892612	339897	1339575	952255	1151091	622592	4942449	347892	939912	518912	1176965	173025	1929160	1637234	1007766	104125840	611333	1822735	906795	912743	338717	6928361	2330187	1864887	295078	1919245	392969	1136859	235861	2107943	167558
		5alpha-pregnan-3beta,20alpha-diol monosulfate (2)	37200	LC/MS Neg	100002014	5060	399.221	-	-	-	-	328649	398608	317947	30729418	393450	615725	186739	256007	332484	596608	182920	643999	96091	930512	109660	139981	98963	461830	ND	350139	290935	285682	101931472	252555	582161	223542	202705	337429	2117119	755975	452801	76632	408949	104227	211257	77676	404053	ND
		5alpha-pregnan-3beta,20beta-diol monosulfate (1)	37196	LC/MS Neg	100002009	5180	399.221	-	-	-	-	115523	144700	91508	7763252	129952	332739	100911	160863	108535	219826	ND	264367	71203	753645	71784	99376	38127	227260	ND	124285	141557	68290	33948148	128953	258045	108186	111420	78393	578499	492758	185215	37387	430285	59194	159701	ND	232646	50663
		andro steroid monosulfate (1)*	32827	LC/MS Neg	100002152	3871	383.153	-	-	C04555	HMDB02759	66374	235377	43798	233637	199247	301550	150236	263244	ND	100228	68422	412617	53865	104650	108414	247851	93031	107602	ND	102766	228316	ND	155633	131178	265083	185406	70120	ND	150619	402042	421615	27772	101535	154422	234783	70411	213117	69667
		androstenediol (3alpha, 17alpha) monsulfate (2)	37207	LC/MS Neg	100002026	4712	369.174	-	-	-	-	184640	98079	141956	429491	221600	280122	207302	78718	49597	330425	60051	386946	43895	169801	86264	477821	215369	599424	63779	213020	81135	128533	288620	194238	263676	229495	59579	30435	292530	443810	314761	58052	217216	139736	427192	146731	461697	89385
		androstenediol (3alpha, 17alpha) monsulfate (3)	37209	LC/MS Neg	100002027	5180	369.174	-	-	-	-	297737	1072434	1494094	701045	450803	1294090	1646220	866032	286245	838184	103562	760255	292170	1147135	538425	1161656	499463	1890076	134037	740753	1281603	1402660	478678	424665	1049652	1651697	724773	200214	693357	3.52173e+06	694076	277045	909000	608472	1451511	347495	2507668	369355
		androstenediol (3beta,17beta) disulfate (1)	37202	LC/MS Neg	100001992	3740	224.062	-	10634	C04295	HMDB03818	10396449	20103684	18948850	17270768	11561132	37181128	27219888	63124948	2186422	18391636	8114602	14568143	12384599	20321468	31693620	53364900	16020371	40208212	6164095	23800472	21695890	18720276	17230992	7650596	30062080	23338484	47153576	2080855	20820776	71167456	15285182	10380267	21838706	24395608	57297680	14014132	57418572	10874905
		androstenediol (3beta,17beta) disulfate (2)	37203	LC/MS Neg	100001994	4065	224.062	-	10634	C04295	HMDB03818	4922108	5857428	7.3048e+06	7556802	6706670	14357117	9329824	11132230	1657608	9103521	2734929	13192638	2568621	7032425	6699177	15895796	6.0409e+06	12247931	1.85333e+06	10327981	4992677	6.71792e+06	4981596	5335769	12142390	9757440	6965108	928597	8183604	19414492	11266947	1812485	6.79618e+06	5775567	18091316	5133532	13684877	4519940
		androstenediol (3beta,17beta) monosulfate (1)	37211	LC/MS Neg	100002028	4500	369.174	521-17-5	-	-	HMDB03818	984339	1.8579e+06	2133895	4003842	642395	2776247	1555595	3380532	516524	1338989	285521	1553239	574660	1.71878e+06	1487840	3052813	1160923	3596061	487413	1088079	1.76633e+06	1728429	2396626	672854	2687713	1532620	2395810	327799	1604768	6090523	1685224	461904	1712228	2.01734e+06	3278608	1118136	7087936	978698
		androstenediol (3beta,17beta) monosulfate (2)	37210	LC/MS Neg	100002029	4500	369.174	-	-	-	-	232121	523543	182121	656113	102563	845019	323735	694718	118470	987926	131865	343089	213411	507052	569202	797859	574455	873780	123124	377215	457681	216997	339951	101987	760894	322532	358699	98240	1093242	1361544	274368	197801	478806	716231	727441	508836	1227632	227845
		androsterone sulfate	31591	LC/MS Neg	100001073	5022	369.174	2479-86-9	159663	-	HMDB02759	2548969	18083738	16544271	21964664	2237167	15625824	16741821	10786463	2581714	23450840	444251	3254783	3656608	12883013	12364390	8159993	11214164	23361374	1.34313e+06	4028558	16047461	14942910	15569289	2136429	12557612	13950059	7138962	2162986	21882138	32121050	2.56589e+06	3.38807e+06	11635318	13732591	8688657	9189366	28744788	4532379
		corticosterone	5983	LC/MS Neg	272	5040	345.207	50-22-6	5753	C02140	HMDB01547	101574	ND	67995	ND	83352	48324	ND	55946	19817	ND	ND	302476	214112	39258	ND	310058	ND	380686	ND	33284	35879	51080	ND	ND	24015	ND	110068	ND	ND	ND	160185	395674	147926	89012	266833	ND	27262	ND
		cortisol	1712	LC/MS Neg	356	4713.2	361.202	50-23-7	5754	C00735	HMDB00063	2783690	1638825	2622445	1576493	1.90185e+06	2427291	1194319	1.7189e+06	1920509	1.02829e+06	667207	2607939	2880450	2586137	1365625	3755976	1886391	2769184	1097509	1765339	1450916	2286771	1514544	893798	1590474	1409983	1498302	1247966	1443409	1597825	2557781	3684601	3060508	2228983	3149093	1348641	1.7174e+06	983040
		cortisone	1769	LC/MS Neg	273	4572.5	359.186	53-06-5	222786	C00762	HMDB02802	931353	871111	829194	868930	725556	1062752	596874	810668	702244	597091	204092	928991	504068	1140922	492780	899950	802074	489788	215976	807790	536461	741383	818658	504637	892259	658366	455144	433247	726626	656139	949638	463660	1361839	993617	864338	618515	785330	373647
		dehydroisoandrosterone sulfate (DHEA-S)	32425	LC/MS Neg	100000792	4745	367.158	651-48-9	12594	C04555	HMDB01032	13722794	38820200	13503195	45655692	8529238	41633508	24811050	36205168	8806109	28824786	4424133	32973380	6582266	38013408	21855220	34930048	17657426	54752732	6843021	16123119	34544872	12447626	41281004	7725193	38602320	23735960	27693822	6068078	32686660	84317072	35604404	6084654	36407924	27117324	37096656	15623025	75157528	13835993
		epiandrosterone sulfate	33973	LC/MS Neg	100001287	4855	369.174	22229-22-7	-	C07635	HMDB00365	1.04049e+06	6.60246e+06	9028685	11451182	1512454	6284534	7.11993e+06	5094855	1671504	10368750	131321	1458176	1186086	3805588	4091663	3466832	4271392	9007003	376930	2700188	4227927	5641871	7.68594e+06	791975	4198005	3964999	2263251	958140	6.96466e+06	11148219	975320	831152	1.9668e+06	2766095	3548571	2501782	9603063	1250155
		etiocholanolone glucuronide	47112	LC/MS Neg	100005403	4915	465.249	3602-09-03	-	-	-	131243	309966	689173	568518	107810	223418	246376	698953	314726	456997	ND	558343	262949	182102	310220	184320	242893	575517	57605	641840	313401	544363	414017	ND	184058	266634	461022	228170	559722	1068458	493454	288393	279229	362461	186511	180127	632019	162361
		pregn steroid monosulfate*	32619	LC/MS Neg	100002067	5000	397.205	1247-64-9	-	-	-	1.95687e+06	3033982	2484942	2700448	4614374	5011830	3604501	4.01279e+06	1298438	3.64571e+06	409395	4108220	1.01895e+06	3461844	1682131	7.2182e+06	1401200	11781487	643753	3890939	2661883	1788313	4037031	5104347	4332574	4.07125e+06	3815714	991086	3407191	11761702	3.65987e+06	1132396	3.78958e+06	2893569	7106443	1194173	10492983	855684
		pregnanediol-3-glucuronide	40708	LC/MS Neg	100003470	5145	495.296	1852-49-9	123796	-	-	165958	169798	239614	5670077	129094	309943	108376	274483	279189	319900	122397	436568	105743	307367	117895	59562	90805	262347	ND	334607	208634	176871	19336356	104752	218820	156171	222562	226422	580154	435064	364751	70870	314031	122944	85790	ND	265199	39044
		pregnanolone/allopregnanolone sulfate	48394	LC/MS Neg	100006173	5160	397.205	-	-	-	-	ND	ND	ND	1808003	ND	149356	ND	44262	ND	64524	ND	ND	ND	108239	ND	ND	ND	ND	ND	ND	ND	ND	10795589	ND	63956	ND	ND	ND	267684	140178	ND	37800	46182	ND	51628	ND	75591	ND
		pregnen-diol disulfate*	32562	LC/MS Neg	100001993	3868	238.077	-	-	-	-	6606368	12281395	6.65718e+06	3200689	12778419	13147443	13061459	17576060	2093248	7946587	4563817	12319076	4524394	10729915	6774161	22461080	5364311	21484176	1528393	13794470	10895055	5279146	3752408	9800896	12685526	13744211	13150582	917074	8740718	30094066	11600210	2879772	11164446	6311080	26119584	3654239	25702312	3589530
		pregnenolone sulfate	38170	LC/MS Neg	100002129	5100	395.19	1247-64-9	105074	-	HMDB00774	512399	671971	225592	352848	794156	1283810	554089	462595	231596	975714	111622	1191405	356244	705912	240856	1425748	221562	2592619	97769	491864	732940	185519	605644	536798	910730	564672	385248	137294	953860	2335458	1114867	901280	784248	425486	1565182	138069	1.82511e+06	97555
		testosterone sulfate	35668	LC/MS Neg	100001548	4600	367.158	651-45-6	119207	C00535	HMDB02833	ND	ND	ND	ND	181169	ND	32450	ND	ND	ND	ND	ND	ND	ND	ND	204187	ND	ND	ND	180583	ND	30887	ND	171452	ND	52126	ND	ND	ND	ND	ND	ND	ND	ND	197348	ND	53318	ND
	Sterol	3beta,7alpha-dihydroxy-5-cholestenoate	36803	LC/MS Neg	100001611	5275	431.317	115538-84-6	3081084	C17335	-	3240702	3007882	2422442	3966218	2517148	3321280	2800430	4309854	3047187	2611413	1961034	4433809	2281894	4473324	3.34523e+06	2421771	2387944	3144821	2469429	2791795	2854361	2179651	3402631	2318363	3.41151e+06	2982333	3479684	2200743	2795426	2584718	4423266	2107600	3937772	3544366	2339917	2439395	3919029	2889367
		3beta,7beta-dihydroxy-5-cholestenoate	36842	LC/MS Neg	100001774	5220	431.317	1246298-66-7	-	-	-	1859115	1265487	1179237	1681875	1439814	2606007	1.81133e+06	1.40671e+06	991594	1493171	1169862	2505081	935070	1590081	1219391	1352054	1343658	1797723	439717	2147101	1121177	976359	1.52622e+06	1090228	2721681	1681171	1262462	730566	1687171	1.86397e+06	2467753	812837	1511935	1193128	1205731	1412552	1755842	975461
		3beta-hydroxy-5-cholestenoate	54805	LC/MS Neg	100006370	5398	415.322	6561-58-6	-	-	-	5699398	4526310	5105017	5366435	3372359	1283780	4606811	6563269	6266574	2572264	8014166	14386109	3569831	5079048	5425214	2449820	4538232	3074095	3917294	3191785	4644928	3733335	3.81956e+06	2145545	1792158	5182985	6539740	6142807	2339039	4765602	10175663	4487883	6501582	7813894	2383844	3944065	4239627	5452687
		4-cholesten-3-one	38125	LC/MS Pos Late	100002227	2520	385.346	601-57-0	91477	C00599	HMDB00921	1333642	1373525	942639	2160180	1920236	1233467	1347089	1357539	1337410	1008497	745245	916541	1080910	833859	1694630	1792387	926257	1040714	1652707	1131900	736017	860143	1786614	1699201	1270005	1389656	1419811	961980	1510775	1231632	909683	1393202	970702	1883112	2394394	1292371	1154337	1696700
		7-alpha-hydroxy-3-oxo-4-cholestenoate (7-Hoca)	36776	LC/MS Neg	100001609	5288.1	429.301	115538-85-7	3081085	C17337	HMDB12458	5881822	4793436	6938651	3936877	5977699	5930946	5706969	6698049	4954792	8775093	6637244	6157756	6609762	4223326	5988194	8144806	4.84392e+06	3588087	5209112	6016747	4353354	7557594	3991131	8153304	8990207	5935044	6772808	3939706	12088277	3490132	6702936	5817676	5242123	6405743	7373286	6921036	4490065	6.40762e+06
		campesterol	33997	LC/MS Pos Late	100001269	2873	383.367	474-62-4	173183	C01789	HMDB02869	115725	394887	207190	232989	328272	242470	402722	396964	676371	272241	179472	281439	375061	379834	467395	434797	53293	276477	314624	313569	336330	166002	274639	272959	302896	583309	212490	478684	451559	265468	181927	157180	518617	457497	265202	57350	335451	337395
		cholesterol	63	LC/MS Pos Late	266	2707	369.352	57-88-5	11025495	C00187	HMDB00067	238950384	326341344	186019440	307384576	285986016	281155136	218551712	247057408	353931808	157086032	247280352	273863136	284366016	270307776	312649408	386432224	215520864	152849296	340764416	182459552	286857696	182972256	336658368	302428128	292800192	229676464	193775968	259505504	213992256	371694528	245709840	318742720	295628448	330304672	344183808	226319456	245445456	322874144
Nucleotide	Purine and Pyrimidine Metabolism	methylphosphate	37070	LC/MS Pos Early	100001805	544	113	7023-27-0	13130	-	HMDB61711	ND	ND	ND	ND	ND	ND	ND	ND	ND	85250	ND	ND	ND	ND	ND	ND	ND	52029	ND	ND	ND	ND	174058	ND	ND	ND	ND	ND	ND	ND	ND	ND	ND	ND	ND	ND	ND	ND
	Purine Metabolism, (Hypo)Xanthine/Inosine containing	allantoin	1107	LC/MS Polar	1002	1672	157.037	97-59-6	204	C02350	HMDB00462	11337853	9801229	13648404	8.2772e+06	13618432	14532871	14515818	13920166	9355841	2846886	11751662	10129966	13211931	11632466	13182041	15672807	11200073	5073542	13854592	10011878	13235486	10616270	17111056	15301896	11384663	13544040	6106870	3.69359e+06	8740790	14069181	10522884	11222258	10505581	9656752	11898741	12150884	13046825	9699726
		hypoxanthine	3127	LC/MS Pos Early	171	1295	137.046	68-94-0	790	C00262	HMDB00157	131452024	137902656	75773408	162150176	141087040	188092320	163827808	245733824	129486688	104611368	163505280	130760984	111573568	168203568	144576448	121160424	198978336	96441896	124949112	63065344	75675008	80314040	324378016	166591376	105336784	178392032	80101832	102891904	170136224	108970888	134146656	87330312	118885216	179253696	141943296	213317680	120034168	244984576
		inosine	1123	LC/MS Neg	361	1602.1	267.073	58-63-9	6021	C00294	HMDB00195	478685	355665	407960	448545	331866	423657	629634	921278	592145	ND	206307	336968	270291	573557	536100	330660	1337023	52419	598186	897423	477631	372445	713905	439634	303697	599116	101344	ND	2484697	200569	293110	299876	533956	788298	336497	7162113	560876	881802
		inosine 5'-monophosphate (IMP)	2133	LC/MS Pos Early	362	650	349.054	4691-65-0	8582	C00130	HMDB00175	66651	435902	266686	150454	2191563	140383	343355	343081	607051	ND	ND	406955	107265	154158	ND	813984	452026	ND	404677	619481	243878	ND	1.86891e+06	605319	380632	520921	ND	ND	1.48877e+06	ND	228271	80279	126983	553097	414931	72880	203886	629192
		N1-methylinosine	48351	LC/MS Pos Early	100001409	1430	283.104	20245-33-4	65095	-	HMDB02721	1878779	1122506	1748922	1342826	2402628	1060095	1077336	2834052	906960	1502050	1.66295e+06	1347365	2354217	1079008	1393497	1323826	1849633	938984	1826554	2376361	1046551	1352711	1538792	1722935	1.04802e+06	1171466	2429718	978175	1177118	1568366	1459575	2159230	1286779	1367327	993134	1605534	1184968	1866136
		urate	1604	LC/MS Neg	1134	757.1	167.021	69-93-2;120K5305	1175	C00366	HMDB00289	283202048	228069360	550224384	348955968	350068928	347724736	273904672	355481664	257922736	236246592	280955424	306599584	405128448	339203648	373682688	350313184	413096704	271937952	378586080	423123520	263226656	461395168	298533376	348822208	337688000	279734848	268571424	204308240	224065216	349955264	258522000	342822976	358796096	371460768	400629664	409828960	384283744	329727168
		xanthine	3147	LC/MS Neg	1004	910	151.026	69-89-6	1188	C00385	HMDB00292	8641220	7523126	9077260	7410212	8454400	11667701	10695015	58185516	7.51074e+06	2370245	9122637	7926954	6664477	8.08368e+06	6452042	15851562	10034516	4466595	6579694	7858895	6002027	7875627	7.30422e+06	9192119	9358316	9828286	20554650	4328275	5202303	7.93542e+06	9961278	6866292	8638176	9587864	15888301	11073088	6274043	8582067
		xanthosine	15136	LC/MS Neg	100000299	1075	283.068	146-80-5	64959	C01762	HMDB00299	60185	60437	89942	30261	75511	40047	45233	443184	ND	ND	48916	43231	72476	31465	ND	40499	58080	ND	76762	47900	64664	98770	38301	57766	37198	39895	101378	ND	ND	54281	46416	63258	61550	26077	49727	41556	39214	55913
	Purine Metabolism, Adenine containing	adenine	554	LC/MS Pos Early	880	2221	136.062	73-24-5	190	C00147	HMDB00034	863517	602056	513318	454491	1112623	539563	537788	726990	909710	543949	622249	484322	688642	428471	612530	613731	596627	422576	1066050	892154	659289	645184	1434125	647314	581837	699528	580329	636834	1041581	682987	573683	526819	593207	841375	459199	615028	522320	689775
		adenosine	555	LC/MS Pos Early	798	2169	268.104	58-61-7	60961	C00212	HMDB00050	ND	134041	210877	ND	343059	ND	ND	167071	ND	ND	ND	67451	80339	ND	ND	81790	466312	ND	ND	180370	ND	ND	492679	100055	ND	128796	ND	ND	2490027	120786	ND	ND	112382	79321	ND	12151485	ND	111061
		adenosine 3',5'-cyclic monophosphate (cAMP)	2831	LC/MS Neg	207	1952.2	328.045	60-92-4	6076	C00575	HMDB00058	108145	116614	106357	117199	165321	107300	124608	123062	84723	270498	114096	137036	133751	127471	73628	118892	105483	126930	86723	88975	102265	105982	106633	111271	114233	120626	126511	176405	82438	80474	128462	103307	104205	91789	132751	127329	129200	94438
		adenosine 5'-monophosphate (AMP)	32342	LC/MS Pos Early	209	1013	348.07	149022-20-8	6083	C00020	HMDB00045	6156277	5226611	5241504	2621507	13890588	2880588	2868245	2808012	5534725	ND	4.16324e+06	3489211	2761720	4442999	2876522	6366065	9392113	ND	5579256	3428079	3706178	2250920	12101827	7.21366e+06	4342112	3961852	ND	ND	18134764	2806935	2665834	1813128	3.69921e+06	5106674	4954732	4228531	2292642	5705473
		N1-methyladenosine	15650	LC/MS Pos Early	1242	2120	282.12	15763-06-1	27476	C02494	HMDB03331	2987260	2251170	2666359	2113850	4000560	2445808	1948174	2.95057e+06	2.76598e+06	2361405	2878551	2153633	3133019	2125971	2574842	2297703	2735499	2247874	2602348	2860437	2277747	2509035	2470896	3.15748e+06	1912480	2079066	3052835	2327015	2375669	3275263	2179807	3.03346e+06	2.0046e+06	2990257	2301749	2545350	2567294	2291207
		N6-carbamoylthreonyladenosine	35157	LC/MS Neg	100001415	2164	411.127	24719-82-2	161466	-	HMDB41623	198473	215626	256707	163088	289052	169516	166460	299697	186358	98484	242609	203038	304963	141116	194719	167703	229569	92412	192576	235085	189913	194739	176467	260199	165175	184523	133351	94747	147297	188673	248333	289030	120295	219263	196945	187623	188519	165864
		N6-succinyladenosine	48130	LC/MS Neg	100001664	980	382.1	4542-23-8	-	-	HMDB00912	92001	90843	93279	66755	112879	111040	84736	137777	93893	21729	102482	76700	139641	91076	88486	99194	105665	ND	68450	113634	89252	80291	73036	95298	83039	76224	61421	30743	53183	96949	94364	126489	95111	69078	129209	99731	70412	67787
	Purine Metabolism, Guanine containing	7-methylguanine	35114	LC/MS Pos Early	100001456	2175	166.072	578-76-7	11361	C02242	HMDB00897	6258809	5480700	10657256	6312615	7.86214e+06	5571962	6029738	9969516	5223973	6744365	5552651	5587340	9814674	6555855	6951063	6389729	7200789	7004383	6783895	7691525	5208555	8193677	6317145	7155582	4960403	6407720	8461193	5730263	5145752	7.21489e+06	6.74791e+06	7399035	6918198	6963405	5581861	6699144	8522103	6732155
		guanosine	1573	LC/MS Neg	1099	1662	282.084	118-00-3	6802	C00387	HMDB00133	52680	39163	ND	54036	36632	30472	35585	ND	60937	ND	ND	ND	36078	64903	63727	ND	120135	ND	62022	53984	57424	ND	ND	34081	ND	22256	ND	ND	206552	11760	ND	ND	62703	47036	ND	571317	ND	72258
		N2,N2-dimethylguanosine	35137	LC/MS Pos Early	100001412	2210	312.13	2140-67-2	92919	-	HMDB04824	1986931	1196711	1547638	1309491	1947950	1116234	1199292	2321140	1020276	1342536	1700961	1071164	2056980	1344608	1348128	1174930	1582896	868204	1585570	1.82697e+06	1.21625e+06	1386387	1259440	1.91575e+06	1099503	1357396	1795321	1025842	1251593	1.27145e+06	1.26676e+06	1754399	1095680	1381514	1195328	1558713	1186707	1532301
	Pyrimidine Metabolism, Cytidine containing	2'-O-methylcytidine	57554	LC/MS Pos Early	100010895	2411	258.108	2140-72-9	150971	-	-	1928419	1820610	1.95777e+06	1.71269e+06	1.74114e+06	1280807	2213615	1922342	1.83539e+06	191157	2104900	1.69832e+06	1.82803e+06	2759782	2038865	1.68093e+06	717793	ND	1.40961e+06	2376938	1550261	1734200	1162784	1.80864e+06	1266989	2283612	124265	479199	763296	1357171	1.99413e+06	1702892	2451219	1.77777e+06	1620620	174093	2145440	1455962
		3-methylcytidine	35132	LC/MS Pos Early	100001466	2176	258.108	21028-20-6	159649	-	-	180502	460748	666412	326969	685386	356512	422697	458652	580683	620377	176806	315055	389136	454400	360300	414926	439634	454129	354358	477183	359174	578907	335443	576176	411514	386656	333531	300732	375411	287634	413057	336990	477408	430965	381638	433700	468734	251432
		cytidine	514	LC/MS Neg	827	1325	242.078	65-46-3	6175	C00475	HMDB00089	113153	67796	239135	50639	77221	33514	39988	ND	63457	31067	35211	73307	137745	150375	717703	28853	102108	18044	125329	74778	56363	134757	47236	50837	31795	42809	36933	16145	81689	30522	61113	130079	28840	108692	34365	143125	48259	134522
		cytosine	573	LC/MS Pos Early	881	2060	112.051	71-30-7	597	C00380	HMDB00630	154554	276485	58067	104597	130341	ND	66358	338352	146384	280580	ND	ND	70086	210329	698040	ND	ND	154164	277502	206905	351916	ND	97757	122232	ND	ND	342202	144813	242191	47926	53720	ND	220932	114667	ND	128084	103213	ND
		N4-acetylcytidine	35130	LC/MS Pos Early	100001413	1580	286.103	3768-18-1	107461	-	HMDB05923	1106249	781883	2493844	669881	1479091	1.03541e+06	722067	992524	521667	881350	987421	1214760	1672275	860529	1749632	705934	2224496	629342	1392654	1294814	696491	1769911	1113861	1266173	534218	779907	1.02017e+06	543802	885863	1063259	1131756	1761096	682320	1492771	1.01863e+06	2198222	815168	2293192
	Pyrimidine Metabolism, Orotate containing	dihydroorotate	601	LC/MS Polar	923	1910	157.025	155-54-4	648	C00337	HMDB03349	ND	ND	ND	208310	ND	222214	83158	495646	ND	515373	ND	39061	125679	186331	86677	ND	194272	345686	219204	108895	ND	184569	ND	ND	ND	88428	828603	505594	ND	ND	108408	116631	80554	ND	ND	165514	218996	88124
		N-carbamoylaspartate	1594	LC/MS Polar	1108	3800	175.036	923-37-5	93072	C00438	HMDB00828	ND	96843	51641	75652	132939	204435	36294	200460	73287	ND	94388	ND	75611	62697	ND	210505	ND	ND	60041	36667	35368	41454	393610	182744	59777	21663	ND	ND	23474	322673	47394	81879	32377	51888	173217	ND	54928	69049
		orotate	1505	LC/MS Polar	445	1638.1	155.01	50887-69-9	967	C00295	HMDB00226	1471492	1153600	1375736	1306348	1881896	1271846	1228140	13492167	1137257	1.01465e+06	1400429	1171171	1431916	1248600	978897	1.91035e+06	1179915	758119	1596128	1548218	988813	967630	2030220	1604454	993396	1233010	5380615	838852	1159686	1611288	1452076	1160774	1038748	1166106	1721790	898476	1159184	1638590
		orotidine	35172	LC/MS Polar	100001416	2250	287.052	314-50-1	92751	C01103	HMDB00788	849283	712019	1106641	595644	1775229	700352	626949	27060076	619326	487796	1127936	352323	1227381	453381	816683	1255200	1014302	418790	685467	1142449	627883	863830	3147622	1236306	675586	701310	16290042	509029	542088	971855	406915	979182	471074	864226	1417763	958544	849993	831606
	Pyrimidine Metabolism, Thymine containing	3-aminoisobutyrate	1566	LC/MS Pos Early	1114	2215	104.071	10569-72-9;214139-20-5	64956	C05145	HMDB03911	38075616	9452745	29033518	14254916	66177380	42315944	13806564	27491788	29407764	14250729	37823824	16464224	26423078	6304097	14850324	9087311	11994382	10397965	7.09023e+06	18434524	12425305	20177472	9483171	62358748	36907120	19478512	20433376	22901360	12996312	11111087	21197880	25772208	4517101	19051696	9541198	11223381	13553153	5484446
		5,6-dihydrothymine	1418	LC/MS Pos Early	158	1280	129.066	696-04-8	93556	C00906	HMDB00079	4240201	3393319	2.01848e+06	4523903	4217052	3014624	3972985	6095742	4242795	1290488	3531710	4500590	4877108	5035842	3109207	3.58084e+06	3128058	777226	4695795	5859329	3.65104e+06	1974182	3810725	4.188e+06	3597596	5218152	669820	1487059	1433881	2657352	5289004	3466866	6211169	4.03283e+06	3129121	1645397	3459974	4908743
	Pyrimidine Metabolism, Uracil containing	2'-deoxyuridine	52602	LC/MS Neg	536	1586	227.067	951-78-0	13712	C00526	HMDB00012	ND	45881	61433	85339	ND	71290	60937	46094	43425	24260	54517	86732	64825	53613	ND	42878	54265	58148	52466	55283	66326	96232	34827	ND	50589	56125	ND	23438	29636	42436	83769	72457	101039	42325	60905	34928	117199	39911
		3-ureidopropionate	3155	LC/MS Pos Early	1053	875	133.061	462-88-4	111	C02642	HMDB00026	ND	ND	215169	297782	336507	211133	199103	491865	163485	1613667	252228	127344	136374	246752	140864	306313	201922	1516066	240574	280034	135001	162777	ND	506424	242109	170416	2176152	1626693	145162	216659	316961	ND	235097	263190	260496	409889	ND	ND
		5-methyluridine (ribothymidine)	35136	LC/MS Neg	100001446	1778.1	257.078	1463-10-1	445408	-	HMDB00884	1087347	1315873	1232321	1166537	1038409	1061587	483247	494999	499067	87450	1073358	1205238	1169934	928959	1129939	997422	243723	76942	845481	1229643	1279868	1202946	1.0434e+06	512119	1017481	935247	ND	67974	219122	927622	1266047	1069077	1084575	1316883	1.03342e+06	92972	1163654	829641
		beta-alanine	55	LC/MS Pos Early	244	1905	90.055	56-41-7;107-95-9	239	C00099	HMDB00056	19514096	13483727	19976108	18114354	32773570	15693600	19846624	24037450	9890531	9098128	15747518	15881146	13576704	16751301	10529782	20697492	13160081	10673383	15875286	27098080	13503884	16827432	17980574	18051286	13614508	25234442	13542732	10064213	9722962	21068176	13701259	10708466	16593215	14735657	19711536	11386868	16056831	16180606
		N-acetyl-beta-alanine	37432	LC/MS Neg	100002102	773	130.051	3025-95-4	76406	C01073	HMDB61880	583819	396372	449714	606394	690356	674014	442879	623753	533578	476256	607944	321724	1.04242e+06	385605	619878	686452	453437	525567	572745	705307	399962	443464	466865	738830	662325	501530	510943	329682	445175	537114	349050	841320	692567	748029	760857	494015	614695	515493
		pseudouridine	33442	LC/MS Neg	821	1100	243.062	1445-07-4	15047	C02067	HMDB00767	16451219	12535539	15774807	11713204	16015039	9906321	12672196	17657796	11144802	4795641	13822924	14455918	19371886	12250997	13450452	11268753	13253805	4937880	12729854	14643071	13420430	15479200	10486308	15812209	9559293	11795547	7664502	4592261	10374427	12649470	14554017	17197786	11162637	14038221	11566287	12041580	12030036	13174235
		uracil	605	LC/MS Neg	825	1086	111.02	66-22-8	1174	C00106	HMDB00300	213089	98067	222037	215438	316960	146905	184489	218358	222945	134575	250726	172636	156772	189405	209883	152086	152157	118430	236297	148130	189999	173809	483271	183543	240434	139944	155643	ND	190424	169833	224322	177122	263042	265276	226938	42284	157267	289570
		uridine	606	LC/MS Neg	535	1457.6	243.062	58-96-8	6029	C00299	HMDB00296	18912520	17679934	20068226	25720764	20324172	20357232	19575924	20991496	21309004	8552147	20838202	19588622	15865636	24461164	18785834	25173776	14153198	12091698	22835430	16659800	19196968	15429362	21761908	18091976	23653716	21511104	10798982	12586041	14029149	17641656	22519986	14461230	28437968	17429424	25914936	14068725	16271987	21768680
Peptide	Acetylated Peptides	4-hydroxyphenylacetylglutamine	55017	LC/MS Neg	100010850	1650	279.099	-	-	-	-	222216	237148	71409	ND	291630	325592	241608	260429	171951	64130	222185	104528	672503	110018	106066	147922	225793	54552	206108	285244	382207	271719	67438	306593	260883	170757	ND	62658	423491	76898	133457	573668	ND	187313	470696	160352	233467	136995
		phenylacetylcarnitine	48425	LC/MS Pos Early	100006108	3092	280.154	287108-21-8	-	-	-	3042143	1257001	984408	942347	2214637	4161552	816234	2116430	2806670	ND	5242561	1829138	881853	1014097	1281930	136230	2570698	746847	6632476	2620805	1486786	1866459	1911173	1930286	4935296	1138041	2.07583e+06	1805022	892543	881697	2603758	1030797	1903726	1420971	481162	4440355	530574	2459419
		phenylacetylglutamate	52925	LC/MS Neg	100009045	1630	264.088	-	11579826	-	HMDB59772	392458	398366	295770	49827	339051	131950	105400	201215	494446	19547	538006	262358	457903	85112	83592	ND	220405	ND	417158	230984	449659	490899	74303	277519	241075	111842	55318	181883	105551	75843	304164	628319	79916	161241	83694	178573	93494	275379
		phenylacetylglutamine	35126	LC/MS Pos Early	100001417	2145	265.118	28047-15-6	92258	C04148	HMDB06344	310187232	225033248	159939712	73349736	277959008	144211040	76784480	163582720	257189216	42071444	292608640	123702656	189229360	78986752	70821584	20527932	142235264	108950720	269348384	171226912	257380448	253027088	109105560	237575760	208231520	90564024	98671352	213446256	126765080	55207760	190141472	248766992	77389280	102363576	75190400	196903552	133774104	165023024
		phenylacetylglycine	33945	LC/MS Neg	100001275	2375	192.067	500-98-1	68144	C05598	HMDB00821	39394	27842	68022	40464	ND	ND	52895	106183	102037	ND	ND	68078	191136	ND	45221	ND	53717	ND	159380	45284	ND	83920	ND	107803	72623	17769	31445	51702	76673	ND	96589	153672	85712	25391	ND	66833	ND	63016
	Dipeptide	isoleucylglycine	40008	LC/MS Neg	100003169	1992	187.109	868-28-0	342532	-	-	172884	206143	180548	124446	269825	126810	176422	154250	341174	ND	116961	131694	83445	133555	144701	189973	167014	ND	67110	114280	194502	85650	246398	179414	192993	161693	ND	116872	189999	111833	146670	ND	159151	299907	148228	107023	180297	61989
		leucylglycine	40045	LC/MS Neg	100003185	2050	187.109	686-50-0	79070	-	-	ND	77923	37183	14608	168835	57369	64990	73498	74197	ND	ND	76567	ND	24865	ND	115057	176002	ND	131559	80882	58810	25411	91176	68847	56223	85085	ND	ND	173511	ND	42421	26851	ND	77912	111203	111243	51600	99956
		prolylglycine	40703	LC/MS Pos Early	100003674	2136	173.092	2578-57-6	7408076;6426709	-	-	779264	919989	927950	881791	1167792	664540	612939	808555	185877	699074	901232	731916	1126851	593903	860346	886118	1122836	248043	861735	713022	838675	999443	558615	562283	1132475	767282	385957	286676	845960	987860	671493	764259	997339	782368	693298	760865	989286	988101
		valylglutamine	42079	LC/MS Pos Early	100003640	2295	246.145	42854-54-6	5253209	-	-	88297	168922	ND	ND	571528	ND	123664	67750	234627	ND	ND	ND	ND	ND	ND	331838	356918	ND	173703	143761	95575	94358	155928	147288	ND	201084	ND	ND	392411	89772	ND	ND	91459	196934	225723	142198	ND	ND
		valylleucine	39994	LC/MS Pos Early	100003210	3138	231.17	22906-55-4	352039	-	HMDB29131	247029	202042	220113	237719	380874	140265	236872	192052	294857	ND	178522	273267	196735	245551	258947	265355	287751	ND	201603	250766	229145	196779	813074	154200	184026	236646	ND	84574	298621	217962	183028	137648	313222	317985	256960	193147	182330	129095
	Dipeptide Derivative	carnosine	1768	LC/MS Pos Early	249	2942	227.114	305-84-0	439224	C00386	HMDB00033	107533	179149	340603	75547	524131	ND	116793	95917	193724	ND	48563	ND	81012	124588	ND	260875	79294	ND	91254	307938	124472	168907	567686	255755	114130	116333	ND	ND	ND	187739	ND	63145	126625	103354	217306	96418	ND	109863
		N-acetylcarnosine	43488	LC/MS Pos Early	100004046	2141	269.124	56353-15-2	9903482	-	HMDB12881	939854	1419145	5786413	2135425	4.08689e+06	2394053	2994498	5681385	1002926	1812844	951282	1596383	3050005	809079	1.78439e+06	5581156	3.85705e+06	1491022	2965849	4.14056e+06	1452558	4865307	1825836	3044754	2390986	3985799	4161952	1.0227e+06	1.82585e+06	2729089	1681759	1892036	1.74725e+06	1802961	4181254	2865658	2566654	2668773
	Fibrinogen Cleavage Peptide	DSGEGDFXAEGGGVR*	31548	LC/MS Neg	100001323	2535	731.317	-	-	-	-	20010	16116	ND	13212	ND	ND	ND	ND	ND	ND	ND	ND	ND	ND	ND	ND	ND	ND	ND	ND	ND	36078	ND	ND	ND	ND	ND	ND	ND	366462	ND	92161	ND	ND	ND	ND	ND	143257
	Gamma-glutamyl Amino Acid	gamma-glutamyl-2-aminobutyrate	37092	LC/MS Pos Early	100001502	2380	233.113	16869-42-4	-	-	-	528898	ND	1028058	838660	1100820	431659	743068	932456	235803	88326	1618819	292420	191554	496170	945040	ND	291507	ND	ND	820834	300457	944676	ND	289282	532496	1054346	ND	ND	ND	980853	583810	ND	713881	928929	836320	ND	508401	634229
		gamma-glutamylalanine	37063	LC/MS Pos Early	100001843	1986	219.098	5875-41-2	440103	-	HMDB29142	3883238	4587073	5863960	3229738	6501286	7766787	5499810	9943581	2.72398e+06	6561703	5868143	4161064	5882220	2805139	5013683	5545756	5733740	5973411	2414699	5719874	5347998	7513908	1170554	5029952	6429164	4851500	9948480	5982266	4426775	7.3436e+06	3777958	5.39337e+06	3792989	5567244	5269224	4580243	7463943	3450162
		gamma-glutamyl-alpha-lysine	55015	LC/MS Pos Early	100010901	2784	276.155	-	65254	-	-	3235310	2477229	1520279	2008402	2428454	1.9457e+06	2066110	2816013	2119616	1499807	3448198	2323768	3060775	2583617	2517063	2414718	2039292	1.92364e+06	1709327	1.98432e+06	2479836	2424291	1720701	2214214	1907336	2415521	2155373	1.9344e+06	1333504	2552979	1965073	2746069	2676679	2768195	2532588	1.67293e+06	1559672	2024569
		gamma-glutamyl-epsilon-lysine	33934	LC/MS Pos Early	100001262	2717	276.155	17105-15-6	7015684;7015685	-	HMDB03869	2888789	2253012	1474891	1.6826e+06	2546629	2119199	1.87992e+06	2557483	2176656	1318337	3292882	2004033	2676559	2018800	2364501	2249865	1774726	803435	1544424	1945027	1.90872e+06	1721051	2139579	1933352	1917073	2190540	1624595	1775795	1374167	2643978	1945935	2559545	2031420	2619279	2157169	1559250	1588485	1740900
		gamma-glutamylglutamate	36738	LC/MS Pos Early	331	1775	277.103	1116-22-9	92865	C05282	HMDB11737	982003	1.02133e+06	1401581	1106100	2663345	765820	1093378	1346122	624424	890941	637553	823509	1.00515e+06	724266	1160818	1049061	1182935	977141	1177959	1212437	922729	1968122	2986395	1.9227e+06	1002523	1074426	1330252	1010491	611639	553478	942867	838943	821839	1357585	1144485	1018800	746824	2663780
		gamma-glutamylglutamine	2730	LC/MS Pos Early	1140	1430	276.119	10148-81-9	150914	C05283	HMDB11738	90650968	77324600	102384024	76629552	80097888	71286280	84073192	95774416	65642428	83936224	98671840	81700168	97237968	65772456	110245064	88631024	47235684	111800720	34717052	83549152	81570032	104213240	64697344	72410048	74328208	85107312	98820912	87858080	68517976	76976504	79632744	85967840	80751464	104530992	77880192	53684264	124661992	56851384
		gamma-glutamylglycine	33949	LC/MS Pos Early	100001294	1535	205.082	1948-29-4	165527	-	HMDB11667	8543157	6458583	8.27145e+06	3961623	4403337	5820259	7964683	6248108	9343013	8702300	8848019	9769625	11729221	6638277	7.98865e+06	5303837	7064879	4725854	4339168	5.22753e+06	7365915	13623412	2815025	4178786	5092468	6797694	4295931	14416373	8095143	6224705	10371441	11037825	9219171	6650262	3.9777e+06	4518339	7535422	5440409
		gamma-glutamylhistidine	18245	LC/MS Pos Early	1235	2740	285.119	37460-15-4	7017195	-	-	1089025	997715	1057220	852728	1481739	799749	898978	1120109	735788	586935	1258443	1167026	1362591	880281	1074868	1103626	860142	480589	686341	925676	1037606	1173992	823075	1192106	758189	1017877	476924	600420	601438	1092978	1070811	1182854	1019647	1041896	1128696	729499	975543	803249
		gamma-glutamylisoleucine*	34456	LC/MS Pos Early	100001485	2940	261.144	-	14253342	-	HMDB11170	1924543	997933	1410644	1228388	2746550	1072196	1274340	1824252	847350	850533	1563504	1048076	1583724	1272543	1547995	1218113	1549501	787449	1064191	1074305	921322	1448224	1156398	1738937	1023093	1402270	1089308	946449	875894	1493153	1114986	1357229	1818301	1298194	1389258	1426981	961170	908605
		gamma-glutamylleucine	18369	LC/MS Pos Early	1268	2991	261.144	2566-39-4	151023	-	HMDB11171	825583	582235	841760	626324	1084012	538351	792398	959381	375046	374202	867819	709566	843361	713536	795351	732296	578418	578851	593140	646830	621857	865248	677188	949883	726950	826549	711558	471471	462026	792340	690240	583842	876034	808467	759916	510008	565076	532796
		gamma-glutamylmethionine	44872	LC/MS Pos Early	100001313	2640	279.101	17663-87-5	7009567	-	HMDB29155	2126822	1479307	2596688	1288070	2.03186e+06	2172726	2169144	3122901	1477311	2266458	2984642	1.90642e+06	2563275	2157153	2118920	2541968	1788161	2419462	1331465	2187915	1624930	3090933	550188	2250616	1710377	2.08169e+06	3035621	2008535	1872318	2076177	2209557	1864818	3362651	2034250	1635555	1425121	1.94665e+06	2.07685e+06
		gamma-glutamylphenylalanine	33422	LC/MS Pos Early	100000491	2992	295.129	7432-24-8	111299	-	HMDB00594	466330	350098	363726	386977	733109	261660	387572	548936	244815	238933	578673	256274	429613	368869	431878	329923	333425	ND	393724	329269	365176	376311	306151	577095	309615	349737	315278	248259	358850	358313	372497	250396	313920	405575	317120	319762	362526	305838
		gamma-glutamylthreonine	33364	LC/MS Pos Early	100001314	1750	249.108	5652-48-2	-	-	HMDB29159	4998601	2367432	2028040	2496761	2755306	1490131	1930144	2516256	2188323	2.09579e+06	5431934	2064916	5616421	3701224	4158982	1617454	2256965	2049329	1800768	2276352	2887128	2467018	1946980	2298313	1543138	2099945	1608296	2448809	2421391	1883079	2548142	4743080	3152440	3395523	1906304	2057230	2451856	2287623
		gamma-glutamyltryptophan	33947	LC/MS Pos Early	100001295	2975	334.14	66471-20-3	3989307	-	HMDB29160	381224	291805	393789	212644	388240	290576	322722	437035	191737	216321	339891	263485	308884	243124	299075	264871	261518	208756	305291	345139	274493	438751	296643	374366	330333	295098	413418	206090	144934	247511	295981	395680	337079	351901	337617	276273	168833	407389
		gamma-glutamyltyrosine	2734	LC/MS Neg	1102	1240	309.109	7432-23-7	94340	-	HMDB11741	537462	264063	383142	279249	482945	396306	376520	498807	272172	86606	559557	299355	378739	356977	477901	343696	422493	144056	383058	286519	265896	430019	292806	436553	365653	348216	259947	147723	173639	366198	287693	267855	311662	391348	327051	326673	289526	450006
		gamma-glutamylvaline	43829	LC/MS Pos Early	100001126	2700	247.129	2746-34-1	7015683	-	HMDB11172	6916499	4663086	3535151	5425272	9023265	4630496	4536064	5379536	3458873	3097342	6026256	2673707	4209197	5252805	6408794	3210274	4762337	3116832	4.01703e+06	2683240	3839610	3952451	5614835	6274872	5297633	5599764	4975940	5094947	3541571	5836343	2553711	4991062	6670758	5388332	5792338	5050468	3168890	3887514
	Polypeptide	bradykinin, des-arg(9)	34420	LC/MS Neg	100001292	4250	902.453	15958-92-6	105044	C00306	HMDB04246	78289	39396	64561	ND	ND	ND	ND	ND	ND	ND	ND	ND	53200	ND	ND	ND	ND	ND	ND	ND	ND	ND	ND	ND	ND	ND	ND	ND	ND	1092826	ND	358375	ND	ND	ND	ND	ND	ND
Xenobiotics	Bacterial/Fungal	tartronate (hydroxymalonate)	20693	LC/MS Neg	100000840	610	118.999	80-69-3	45	C02287	HMDB35227	4962022	3176694	2234052	2524043	2297932	2518887	3.21761e+06	2571099	4113464	ND	3.46402e+06	2051737	3011061	3304706	3.49311e+06	2900692	1326160	ND	2.95696e+06	2799934	2694635	3.5009e+06	1.76561e+06	2644758	1995236	4.0363e+06	ND	ND	2293877	2535040	2370962	3415487	5991109	4299981	2788692	ND	1145369	2091314
	Benzoate Metabolism	2-hydroxyhippurate (salicylurate)	18281	LC/MS Neg	1869	2184	194.046	487-54-7	10253	C07588	HMDB00840	8424232	2193864	1335068	1353259	103937256	5232131	649580	12828576	100920216	196346	7295806	279884	807040	2924579	2428228	44901	53556816	98852	471456	5956834	21548768	1281347	1571862	41277708	22229672	460104	1673838	77486344	195560	1071991	264234	570729	2138889	5877930	63792	46191328	176394	896217
		3-(2-hydroxyphenyl)propionate	35634	LC/MS Neg	100001623	2530	165.056	495-78-3	873	C01198	HMDB33752	135980	ND	ND	ND	169997	ND	150276	ND	ND	ND	ND	ND	ND	66879	ND	ND	ND	63586	ND	ND	272932	235308	ND	ND	ND	262188	644989	86806	123533	ND	97042	ND	ND	222613	ND	57451	ND	ND
		3-hydroxyhippurate	39600	LC/MS Neg	100002122	1687	194.046	1637-75-8	450268	-	HMDB06116	1.76483e+06	1441809	580596	1.5176e+06	932043	18164776	2137130	2123913	2.58824e+06	424811	540229	421253	1782722	1930809	16106215	87902	2227253	2351799	5.09053e+06	13112685	4578371	1.85717e+06	1.62426e+06	1264709	864476	2589843	1501414	1052312	3484372	1765265	1173595	1599327	3.42054e+06	17219700	717936	2908584	5.68282e+06	4812379
		3-methoxycatechol sulfate (1)	48763	LC/MS Neg	100006375	2163	218.997	-	-	-	-	1379666	444217	1132773	ND	137424	1409811	367503	502066	400855	16134754	340005	224564	1045908	2441796	2594872	596040	2638676	193570	2057599	8022748	1957468	950321	ND	568081	5349487	1778390	1303354	1565583	16887878	1988238	ND	1257437	1892604	3.28005e+06	3322375	4582603	554304	ND
		3-methyl catechol sulfate (1)	46165	LC/MS Neg	100004112	2790	203.002	-	-	-	-	3520863	1542149	1729566	532580	1188806	3346789	361520	3878903	1427736	53150	547450	156838	170999	90834	1334287	92938	989627	864117	9195647	909807	1.57533e+06	3082907	864608	1896824	303420	504073	1.03011e+06	6.31134e+06	ND	463882	137770	276911	239085	1.86127e+06	164778	557527	1144029	556328
		3-methyl catechol sulfate (2)	46164	LC/MS Neg	100004110	2860	203.002	-	-	-	-	250780	69587	ND	ND	41139	33374	ND	73734	20941	ND	ND	ND	ND	ND	ND	ND	ND	ND	606183	ND	72266	34873	ND	30828	ND	ND	ND	326945	ND	ND	ND	ND	ND	20604	ND	ND	ND	ND
		4-ethylphenylsulfate	36099	LC/MS Neg	100001756	3580	201.023	123-07-9	-	C13637	-	1271509	6340558	169217	1273851	2161713	6183274	1991553	2188972	48122908	526149	10580887	1503356	1425074	2259887	751186	326491	1.56814e+06	4194279	11045000	1264136	7046453	309670	728861	1241428	3.926e+06	6500140	1058662	5223649	533424	1040062	2.67966e+06	873263	892785	530804	390991	457058	918183	295039
		4-hydroxyhippurate	35527	LC/MS Neg	100001423	1475	194.046	2482-25-9	151012	-	HMDB13678	1380635	1539117	357279	1078705	900876	2630871	866903	1070804	1402780	491327	1440726	492229	942377	3106903	3293506	1189478	2474493	1.04457e+06	1664948	8356015	2319941	595229	936912	1242879	2563156	909419	557204	876707	2270993	595604	713084	1523104	2285350	43669288	1381896	2281117	2987788	1129395
		4-methylcatechol sulfate	46146	LC/MS Neg	100004111	2665	203.002	-	-	-	-	36672788	16340474	5636811	22692156	62800012	20125940	8598604	19151188	18515890	7962570	26605704	29510190	19835148	12046494	5444489	780811	42360908	9798355	8.10396e+06	11949573	21660288	10132796	12041766	8940144	32781692	15605029	7711260	15233499	21670492	41870184	25064254	22530320	12717527	11668349	2452220	40621724	15036623	4.0518e+06
		4-vinylphenol sulfate	36098	LC/MS Neg	100001755	3320	199.007	2628-17-3	6426766	C05627	HMDB04072	5042779	7.90114e+06	2741417	2.04319e+06	33225444	3113729	32139778	4242966	19450860	8840216	3386578	10928247	52114240	13128669	7742266	12365112	2825857	11144380	7593611	46310424	35763816	2.01312e+06	3276530	16169239	2949126	26521476	2689577	12120519	11250740	6989121	2147252	4199497	6286873	45433332	8964637	5462690	10609096	1960549
		benzoate	15778	LC/MS Neg	100000008	1750	121.029	65-85-0	243	C00180	HMDB01870	3548595	3741781	3468861	3190951	3189875	3839578	3026639	3643275	4533702	5821071	2998448	4577432	4174668	5202437	7169750	2726293	5429814	4539617	2179241	3626674	2782902	3094842	3020817	7645740	4496619	2892058	6502817	5345805	3190894	3020264	1668357	2916815	3892692	3433632	4203795	5195562	3205073	3332958
		catechol sulfate	35320	LC/MS Neg	100001605	1906	188.986	4918-96-1	3083879	C00090	HMDB59724	37319336	22571300	5184862	9107226	18052896	22991150	25665378	29311544	36421632	13172420	21860366	18303994	28987988	23550052	33817676	7880012	5328842	11277109	40458676	12018804	33708968	11602329	11092313	34469276	5562060	29260106	22282808	36433680	11586602	41586424	17696620	26712772	13381589	33909072	19726826	10924273	20194624	8520062
		hippurate	15753	LC/MS Neg	100000014	2106.9	178.051	495-69-2	464	C01586	HMDB00714	204846192	77114400	17240240	50198096	82835488	82452136	76822976	94721800	99901448	32973992	73491640	30666208	51081744	22478600	85081440	7281064	11275509	9156141	22992656	53242192	101979504	61948704	51932024	171373552	7355157	89248424	138673488	61960996	23631560	70123872	49018800	57413456	45851624	112107336	9197653	11586394	16773036	28454730
		methyl-4-hydroxybenzoate sulfate	48429	LC/MS Neg	100006116	2873	230.997	-	-	-	-	1.56677e+06	5568484	1281503	16657291	7533732	11115257	423918	4088464	14351324	1223813	3408969	1062287	4579464	5172542	783692	116369	1412949	758133	905743	267866	6202253	1085257	12140922	11657305	14070151	617619	1096941	16201401	469839	1086943	641288	5280414	612136	10502309	126018	5129295	314206	577823
		O-methylcatechol sulfate	46111	LC/MS Neg	100004208	2344	203.002	-	22473	-	-	6.54314e+06	5138576	1478895	907606	5174203	3235342	4450159	3.33579e+06	4710820	2116383	2581286	1896506	3.69647e+06	2882999	4.00763e+06	1.03859e+06	1300789	1255398	8693411	3850153	6928726	3050367	1187191	8767622	1024115	7292925	2127209	5624029	1307941	2891205	3436364	4531967	2003209	6321083	2453363	2.73401e+06	2622848	1606333
		propyl 4-hydroxybenzoate sulfate	48460	LC/MS Neg	100006264	3971	259.028	162338-10-5	-	-	-	ND	161766	121548	2103713	944520	3.07784e+06	1492931	97109	248074	37541	162903	54338	32905	384480	ND	ND	94179	ND	25356	ND	61801	ND	977021	1081060	3830391	1265031	53068	1527608	191774	189199	173347	324013	ND	500205	ND	655773	ND	ND
	Chemical	1,2,3-benzenetriol sulfate (2)	48762	LC/MS Neg	100006374	1709	204.981	-	-	-	-	2277745	92886	235184	51999	27869	1818566	88573	277279	322448	23704210	395975	15841	2715556	2493124	1083125	599920	2215090	233610	4318475	5.97718e+06	1771746	47450	98072	149134	9711843	302826	ND	3068559	18528086	3257368	22351	1593991	2011271	3093716	3732374	2587148	596397	42410
		2-aminophenol sulfate	43266	LC/MS Neg	100004322	1677	188.002	-	181670	-	HMDB61116	7492435	1191297	2113217	140032	1162411	1974411	3112320	2402550	1322967	260249	2750498	1136364	3059250	2543475	1.44831e+06	434500	1.44929e+06	2059490	855805	1738517	8672658	5804480	458142	521866	65089	2552448	2370238	1320934	871597	3422687	854277	3730532	1426348	4309761	1189975	2169473	7157934	1428837
		2-methoxyresorcinol sulfate	48445	LC/MS Neg	100006184	1863	218.997	1446269-78-8	-	-	-	338232	ND	ND	ND	ND	ND	ND	ND	ND	1139482	ND	ND	339593	123545	ND	ND	293942	ND	146682	373107	65376	ND	ND	ND	551591	ND	ND	191909	1534289	ND	ND	422870	99733	186154	ND	616905	ND	ND
		3-acetylphenol sulfate	48693	LC/MS Neg	100004326	2477	215.002	-	-	-	-	252875	98822	ND	ND	ND	169142	22674	111468	55411	ND	ND	ND	120485	20752	95846	ND	ND	44764	592698	123868	144382	ND	ND	49626	ND	26957	ND	264440	ND	101898	ND	34641	28644	157589	ND	23891	94451	54403
		3-hydroxypyridine sulfate	48448	LC/MS Neg	100006098	1595.5	173.987	1955-23-3	-	-	-	21716982	1801418	1234565	1011349	2856130	3.45508e+06	590302	6.27885e+06	4267067	99100	1278806	777696	465613	41538	2076378	55368	51519	1888285	38351888	2299132	2877913	873111	722386	4294401	61323	802111	2.02314e+06	25560404	213273	551031	671012	368551	157934	2641011	62872	196054	951807	1149193
		4-hydroxychlorothalonil	48441	LC/MS Neg	100006082	4427	244.908	28343-61-5	34217	-	-	3755135	5040544	4.11148e+06	6086031	8.38106e+06	3750430	3278204	5521308	4443674	3898574	3516434	4306374	3171010	5800775	4983339	4206264	3001747	2110521	2347693	4761027	4947138	4.17449e+06	5370864	7754561	3648758	3492488	3493500	4032347	4331017	5752240	4299285	4.02092e+06	5465482	6869374	3693689	2818454	3153247	2325275
		6-hydroxyindole sulfate	48698	LC/MS Neg	100006260	2498	212.002	-	-	-	-	2437113	2.77259e+06	1213113	1596728	3759298	1.92633e+06	1824573	1686519	1477398	1769627	3173791	929750	2663795	2.82438e+06	1373827	770053	2158268	2402433	2179037	2862471	2.83063e+06	2168112	2075296	3158023	2663316	1897762	608745	1294147	2884075	1.4147e+06	950040	2768680	2.83232e+06	1.92167e+06	1879373	2860550	4077136	1163002
		benzoylcarnitine*	43265	LC/MS Pos Early	100004555	3041	266.139	105450-08-6	-	-	-	387522	72281	330040	79831	513276	303564	ND	524289	207153	ND	210476	ND	ND	ND	237645	ND	ND	ND	ND	ND	83261	426985	175787	556661	ND	ND	ND	ND	ND	196182	163691	ND	ND	360358	ND	ND	ND	ND
		dimethyl sulfone	43424	LC/MS Pos Early	100004284	832	95.0161	67-71-0	6213	C11142	HMDB04983	336395	315608	1831508	1357643	ND	234501	906704	1273715	1782543	268689	648740	1214595	2961788	2264341	ND	608850	566546	1952179	4472639	2792034	1.00684e+06	1003690	359125	779287	858638	910412	711195	179256	ND	906147	731725	3410133	3268331	318970	201790	685929	2.86963e+06	3058742
		ectoine	35651	LC/MS Pos Early	100001635	1980	143.082	96702-03-3	126041	C06231	-	6227349	702167	1359801	1287922	2441376	200859	1481137	2306646	1.8763e+06	235830	1119606	327353	1204493	789116	527465	367088	247082	1493639	838369	1.94605e+06	2248019	2182212	821952	602097	266888	1223827	920229	306759	ND	4810568	215897	2682406	1400031	373383	2064000	191973	486359	393054
		EDTA	22163	LC/MS Pos Early	100001002	875	293.098	60-00-4	6049	C00284	HMDB15109	6141229568	6520114176	5973998080	6916286976	6706433024	6464871936	6729863680	6368040960	6326504960	ND	6196281856	6688870912	6596723200	6293828096	6368529920	6107681280	4977834496	ND	6102266368	6776188416	6356596736	6582555136	7172025856	6497455104	6640458752	7058429952	ND	ND	4213169408	6918848000	6468763648	6375363584	6465925632	5960412672	6577835008	3589816320	6465465856	5965530112
		ethyl glucuronide	39603	LC/MS Neg	100002849	793	221.067	17685-04-0	152226	-	-	ND	170100	407185	275677	ND	214349	ND	121392	273051	330036	130061	ND	51592	223475	167561	264170	323504	ND	221547	186708	121742	ND	508404	363875	295959	219048	216127	ND	244311	1.77905e+06	244688	ND	220462	303039	368163	200879	272881	ND
		HEPES	21248	LC/MS Pos Early	100000843	1627	239.106	7365-45-9	23831	-	-	ND	ND	ND	ND	ND	ND	766383	ND	ND	ND	ND	ND	ND	ND	ND	ND	ND	ND	ND	ND	ND	ND	ND	ND	ND	ND	ND	ND	ND	ND	ND	ND	ND	ND	ND	ND	ND	ND
		iminodiacetate (IDA)	21025	LC/MS Pos Early	100000900	808	134.045	142-73-4	8897	C19911	HMDB11753	69993040	191255360	44131556	61665908	68343704	61273048	63329316	68234592	65738136	ND	47648060	224619264	51292960	44797608	53597272	92097544	35155468	ND	99442736	106184176	168899664	44646680	88725224	171047120	47474096	65406832	ND	ND	18867680	88088712	236954864	49457844	57424596	68241144	98185008	4952315	61188884	119873680
		lanthionine	42002	LC/MS Pos Early	100003892	1730	209.059	3183-08-02	6994972;98504	-	-	319959	339970	366261	172543	574258	130195	282740	409444	540525	53804	484161	269306	440781	293635	599850	127270	147206	154285	344824	300902	654370	640482	154844	374618	163417	340097	309847	459684	ND	226318	456811	546592	421872	386805	274181	365656	226789	ND
		N-methylpipecolate	47101	LC/MS Pos Early	100005383	1932	144.102	41447-17-0	11862129;11286529	-	-	11003591	4617209	81953208	6675164	10597591	8841306	5259522	62201904	39526680	18035404	10641493	5369339	9981012	6.22516e+06	34801852	38356672	39016624	6276588	20881468	11376324	6250004	56421120	5.36674e+06	9005241	6419872	6.69845e+06	50946672	48400968	13970283	6983606	5134409	7388501	8898511	34650236	43157664	34344292	10829949	11527338
		O-sulfo-L-tyrosine	45413	LC/MS Neg	100005384	990	260.023	-	514186	-	-	1809015	2259586	1267622	2270508	1961915	1844732	1.64402e+06	2404760	1553209	1365062	1.62916e+06	2024942	1942112	1948516	2116696	1703341	1983567	981970	1.95736e+06	2088909	2407265	1413800	1782863	1631651	1765045	1481766	1402125	776261	2228902	3387542	2389932	1795498	2085734	1770176	1663019	1928206	1764955	2219586
		perfluorooctanesulfonic acid (PFOS)	57564	LC/MS Polar	100010955	662	498.93	1763-23-1	74483	C18142	HMDB59586	1642639	4371525	3428956	1153449	1546023	1.2261e+06	828399	1628085	2.53068e+06	369839	1541704	4512592	6384795	2831403	1517388	2540421	1684594	630470	537708	1540663	4813178	2487829	1261993	1369108	1307302	1023955	1.34973e+06	1946931	429492	1082015	4730846	4222896	2.63625e+06	1168821	2379593	1593979	871958	457592
		sulfate*	46960	LC/MS Neg	100002528	616	96.9601	14808-79-8	1118	C00059	HMDB01448	66518376	50877592	58829080	52756144	72291096	54112724	47000800	78339320	51816732	104389920	67848112	49950812	61072032	58127760	59503836	53287104	63797896	76323936	74697440	64116552	57880740	62669772	53620336	54261956	53391352	49007420	91603456	45126448	110427224	52500976	59894496	56899916	62516196	57156744	56646664	140148192	60583772	64474072
	Drug	2-acetamidophenol sulfate	48580	LC/MS Neg	100006190	2251	230.013	40712-60-5	181671	-	-	1888366	ND	ND	ND	ND	336982	276210	166769	290114	ND	429748	91685	123371	721599	ND	ND	ND	ND	ND	ND	1.6535e+06	645593	ND	ND	ND	142323	1669261	171176	ND	533984	ND	175479	191703	324796	ND	144105	1046589	ND
		2-hydroxyacetaminophen sulfate*	33173	LC/MS Neg	100001791	1674	246.008	-	-	-	-	39255	ND	ND	ND	1635339	ND	ND	16730394	19351808	ND	ND	ND	1043838	ND	128530	ND	ND	ND	ND	ND	72418	ND	ND	17410422	ND	ND	14015309	13595722	120566	21686	18699	ND	ND	ND	ND	ND	3664407	ND
		2-hydroxyibuprofen	43330	LC/MS Neg	100004169	3462	221.118	51146-55-5	-	-	-	ND	ND	334682	ND	ND	ND	ND	ND	ND	ND	96236	ND	ND	122966	ND	ND	ND	ND	ND	ND	ND	7.01129e+06	ND	ND	ND	ND	ND	ND	ND	ND	ND	ND	ND	ND	ND	ND	ND	ND
		2-methoxyacetaminophen glucuronide*	33161	LC/MS Neg	100001795	1633	356.099	-	-	-	-	ND	ND	ND	ND	130642	ND	ND	3223728	959232	ND	ND	ND	246115	ND	ND	ND	ND	ND	ND	ND	ND	ND	ND	2796620	ND	ND	3239824	527749	ND	ND	ND	ND	ND	ND	ND	ND	605060	ND
		2-methoxyacetaminophen sulfate*	47031	LC/MS Neg	100001793	1949	260.023	-	-	-	-	ND	ND	ND	ND	394635	ND	ND	1764642	1960510	ND	ND	ND	154728	ND	ND	ND	ND	ND	ND	ND	ND	ND	ND	5095981	ND	ND	2723677	1490410	ND	ND	ND	ND	ND	ND	ND	ND	474830	ND
		3-(cystein-S-yl)acetaminophen*	34365	LC/MS Pos Early	100001797	2420	271.075	-	5233914	-	-	ND	ND	ND	ND	409367	ND	ND	8386393	5261615	ND	ND	ND	934986	ND	ND	ND	ND	ND	ND	ND	ND	ND	ND	7743709	ND	ND	4879259	3626295	ND	ND	ND	ND	ND	ND	ND	ND	1178503	ND
		3-(N-acetyl-L-cystein-S-yl) acetaminophen	45721	LC/MS Neg	2048	2094	311.071	52372-86-8	83967	-	-	ND	ND	ND	ND	197214	ND	ND	4194123	2025580	ND	ND	ND	129847	ND	37196	ND	ND	ND	ND	ND	ND	ND	ND	5246258	ND	ND	3358795	1171214	ND	ND	ND	ND	ND	ND	ND	ND	406454	ND
		4-acetamidophenol	12032	LC/MS Neg	1383	2173.7	150.056	103-90-2	1983	C06804	HMDB01859	ND	ND	ND	ND	315117	ND	ND	5968928	6854856	ND	ND	ND	249985	ND	ND	ND	ND	ND	ND	ND	ND	ND	ND	11740164	ND	ND	12342556	6.91645e+06	ND	ND	ND	ND	ND	ND	ND	ND	1152904	ND
		4-acetamidophenylglucuronide	15736	LC/MS Neg	100000043	1400	326.088	120595-80-4	83944	-	HMDB10316	ND	16467	ND	ND	3287686	ND	ND	54897280	27154982	ND	ND	ND	2594393	ND	159550	ND	ND	ND	ND	ND	ND	ND	ND	67905080	ND	ND	58190836	18986470	ND	ND	ND	ND	ND	ND	ND	ND	6626595	ND
		4-acetaminophen sulfate	37475	LC/MS Neg	2049	1792	230.013	10066-90-7;32113-41-0	83939	C06804	HMDB59911	126242	87310	ND	ND	6293208	ND	ND	56365216	68334408	ND	69076	ND	2673764	61407	303485	ND	ND	ND	ND	ND	36875	ND	ND	93902504	ND	ND	48202920	47595952	ND	14264	64618	ND	ND	ND	ND	ND	9905932	ND
		4-acetylphenol sulfate	44620	LC/MS Neg	100000711	2375	215.002	-	4684006	-	-	95247	82762	ND	36641	49943	52319	43039	68644	749967	21151	87581	66414	66476	65792	53792	ND	21546	44684	180594	240610	293156	ND	22187	248419	31857	78437	57174	160865	46505	85117	35041	50984	60870	221805	30645	18319	74330	ND
		4-hydroxycoumarin	37445	LC/MS Neg	100002049	2470	161.024	1076-38-6	54682930	C20414	-	764533	175369	48628	175786	524239	110749	392187	267144	147033	ND	868942	57295	55181	170040	ND	61216	114756	ND	52417	ND	1182100	1645416	368367	185394	84238	518546	2420168	136551	173120	247518	1.02029e+06	206516	210332	451544	1100293	212999	160813	131528
		alpha-hydroxymetoprolol	54738	LC/MS Pos Early	100006385	2900	284.186	56392-16-6	114962	-	-	ND	ND	ND	ND	ND	ND	ND	ND	ND	ND	ND	ND	ND	ND	ND	ND	ND	ND	ND	19418156	ND	ND	ND	ND	ND	ND	ND	ND	ND	ND	ND	ND	ND	ND	ND	ND	ND	ND
		carboxyibuprofen	43333	LC/MS Pos Late	100004171	810	254.139	15935-54-3	10444113	-	-	ND	179195	614972	296516	527815	ND	ND	ND	1134878	759163	ND	ND	687613	1559485	274137	ND	ND	ND	ND	305013	158882	16101981	667315	173839	ND	ND	337912	1154941	728008	ND	170923	471457	94740	287887	ND	ND	778461	ND
		Cetirizine	54745	LC/MS Pos Late	100009034	1052	389.163	83881-51-0	2678	C07778,D07662	HMDB05032	ND	ND	17048968	ND	ND	ND	ND	ND	ND	ND	ND	ND	141832720	ND	ND	1060858	ND	ND	ND	ND	ND	57914936	ND	ND	ND	ND	ND	ND	ND	ND	ND	50181828	ND	ND	ND	ND	ND	ND
		desmethylnaproxen	46331	LC/MS Neg	100001787	3045	215.071	52079-10-4	-	-	-	ND	79577	1.97651e+06	ND	ND	ND	ND	ND	ND	ND	ND	ND	ND	ND	ND	ND	ND	ND	ND	ND	ND	1474027	ND	ND	ND	ND	ND	ND	ND	ND	ND	1064875	ND	ND	ND	ND	ND	ND
		desmethylnaproxen sulfate	46106	LC/MS Neg	100001788	2276	295.028	-	184679	-	-	ND	7426672	126877112	ND	ND	ND	ND	ND	ND	ND	ND	ND	ND	ND	ND	ND	ND	ND	ND	ND	ND	94883928	ND	ND	ND	ND	ND	ND	ND	ND	ND	68523128	ND	ND	ND	ND	ND	ND
		diltiazem	42981	LC/MS Pos Late	100004015	888	415.169	33286-22-5	39186	C06958	HMDB14487	ND	ND	ND	ND	ND	ND	ND	ND	ND	ND	ND	ND	ND	ND	ND	ND	ND	ND	ND	ND	ND	ND	ND	ND	ND	ND	ND	ND	ND	ND	ND	ND	ND	ND	ND	ND	ND	ND
		diphenhydramine	38669	LC/MS Pos Late	100002732	911	256.17	147-24-0	3100	C06960	HMDB01927	ND	ND	4923049	ND	404069	ND	ND	10252289	ND	ND	ND	ND	ND	ND	ND	ND	ND	ND	98011	ND	ND	4541857	ND	67398	ND	ND	1282829	ND	ND	ND	ND	ND	ND	ND	ND	ND	ND	60623
		escitalopram	40459	LC/MS Pos Late	100003444	908	325.171	219861-08-2	146570	-	HMDB05028	ND	ND	ND	ND	ND	ND	ND	ND	12499918	ND	ND	ND	ND	ND	ND	ND	ND	ND	88994432	ND	ND	ND	ND	ND	ND	ND	ND	2916531	ND	ND	ND	ND	ND	ND	ND	ND	ND	15319876
		fluoxetine	44619	LC/MS Pos Late	1382	1025	310.141	59333-67-4	3386	D00326	-	ND	ND	ND	ND	ND	ND	ND	ND	ND	ND	ND	ND	ND	ND	ND	ND	ND	ND	ND	ND	ND	ND	ND	ND	ND	ND	ND	ND	ND	ND	ND	ND	ND	ND	ND	100786	ND	ND
		gabapentin	38686	LC/MS Pos Early	100002806	3123	172.133	60142-96-3	3446;6919078	D00332	HMDB05015	ND	ND	ND	ND	2979393536	ND	ND	ND	ND	ND	ND	ND	1261065216	ND	ND	ND	ND	ND	ND	ND	ND	ND	ND	2400814080	ND	ND	ND	ND	ND	ND	ND	1578245632	ND	ND	ND	ND	ND	ND
		hydrochlorothiazide	39625	LC/MS Neg	100002734	2046	295.957	58-93-5	3639	C07041	HMDB01928	ND	ND	1043705	ND	7395163	2452839	ND	ND	ND	ND	ND	1388103	6720287	ND	2183567	ND	3926967	ND	ND	ND	ND	740003	ND	7579132	2505532	ND	ND	ND	ND	ND	3085291	2596537	ND	2812349	ND	3592098	ND	ND
		hydroquinone sulfate	35322	LC/MS Neg	100001604	1395	188.986	123-31-9	161220	C00530	HMDB02434	371777	185144	41154	36557	154667	139315	283612	101795	164829	40451	114769	112342	223916	544629	228138	55616	190384	327670	548000	100868	438255	120302	92949	121346	224662	279545	202420	310013	82300	737666	58156	163367	144345	192657	ND	55284	915904	170056
		ibuprofen	17799	LC/MS Neg	1487	4925	205.123	15687-27-1	3672	D00126	HMDB01925	ND	190620	417508	322521	124568	37740	ND	107596	1525043	426723	ND	123991	342747	1873963	308953	ND	38744	132019	ND	225796	167144	1734523	613140	ND	ND	ND	346194	1647872	335015	ND	161572	246660	170096	329785	ND	31217	432741	ND
		ibuprofen acyl glucuronide	38366	LC/MS Neg	100002406	4976	381.155	115075-59-7	163959	-	-	ND	ND	ND	ND	ND	ND	ND	ND	ND	ND	ND	ND	ND	ND	ND	ND	ND	ND	ND	ND	ND	21329	ND	ND	ND	ND	ND	ND	ND	ND	ND	ND	ND	ND	ND	ND	ND	ND
		lidocaine	35661	LC/MS Pos Late	100001538	746	235.18	137-58-6	3676	D00358	HMDB14426	ND	ND	ND	ND	ND	ND	ND	ND	ND	ND	1151722	ND	ND	ND	ND	ND	ND	ND	ND	ND	ND	ND	ND	ND	ND	ND	ND	ND	ND	ND	ND	613922	ND	ND	ND	ND	ND	ND
		lisinopril	54787	LC/MS Neg	100009389	2617	404.219	76547-98-3	3937	-	-	ND	ND	83894	ND	ND	ND	ND	85225	ND	ND	ND	ND	ND	ND	ND	ND	ND	ND	ND	ND	ND	81110	ND	ND	ND	ND	ND	ND	ND	ND	ND	ND	ND	ND	ND	ND	ND	ND
		metformin	38306	LC/MS Pos Early	100002405	2817	130.109	1115-70-4	4091	C07151	HMDB01921	ND	ND	ND	ND	ND	ND	ND	ND	ND	ND	ND	ND	ND	ND	ND	ND	ND	ND	ND	ND	ND	ND	ND	ND	ND	ND	ND	ND	ND	ND	ND	ND	ND	ND	ND	ND	ND	ND
		metoprolol	18037	LC/MS Pos Early	2028	3312	268.191	56392-17-7	4171	D02358	HMDB01932	ND	ND	ND	ND	ND	ND	ND	ND	ND	ND	ND	ND	ND	ND	ND	ND	ND	ND	ND	8473876	ND	ND	ND	ND	ND	ND	ND	ND	ND	ND	ND	ND	ND	ND	ND	ND	ND	ND
		metoprolol acid metabolite*	34109	LC/MS Pos Early	100001385	2950	268.154	56392-14-4	62936	-	-	ND	ND	ND	ND	ND	ND	ND	ND	ND	ND	ND	ND	ND	ND	ND	ND	ND	ND	ND	321182656	ND	ND	ND	ND	ND	ND	ND	ND	ND	ND	ND	ND	ND	ND	ND	ND	ND	ND
		N,O-didesmethylvenlafaxine glucuronide	52358	LC/MS Pos Early	100006001	2902	426.212	1021933-99-2	-	-	-	ND	ND	ND	ND	ND	ND	ND	ND	ND	ND	ND	ND	6027700	ND	ND	ND	ND	ND	ND	ND	ND	ND	ND	ND	ND	ND	ND	ND	ND	ND	ND	4763874	ND	ND	ND	ND	ND	ND
		naproxen	12122	LC/MS Neg	1384	4155	229.087	22204-53-1	156391	C01517	HMDB01923	ND	18437256	157064272	ND	ND	ND	ND	ND	ND	ND	ND	ND	ND	ND	ND	ND	ND	ND	ND	ND	ND	156494528	ND	ND	ND	ND	ND	ND	ND	ND	ND	105919744	ND	ND	ND	ND	ND	ND
		N-desmethyl tramadol	52355	LC/MS Pos Early	100006384	3360	250.18	147762-57-0	-	-	-	ND	ND	ND	ND	ND	ND	ND	ND	ND	ND	ND	ND	ND	ND	ND	ND	ND	ND	ND	ND	ND	ND	ND	ND	ND	ND	ND	ND	ND	ND	ND	ND	ND	ND	ND	ND	ND	ND
		N-ethylglycinexylidide	33080	LC/MS Pos Early	100001539	3209	207.149	7728-40-7	24415	C16561	HMDB60656	ND	ND	ND	ND	ND	ND	ND	ND	ND	ND	137311	ND	ND	ND	ND	ND	ND	ND	ND	ND	ND	ND	ND	ND	ND	ND	ND	ND	ND	ND	ND	ND	ND	ND	ND	ND	ND	ND
		norfluoxetine	37252	LC/MS Pos Late	100003769	1008	296.126	83891-03-6	4541	-	-	ND	ND	ND	ND	ND	ND	ND	ND	ND	ND	ND	ND	ND	ND	ND	ND	ND	ND	ND	ND	ND	ND	ND	ND	ND	ND	ND	ND	ND	ND	ND	ND	ND	ND	ND	ND	ND	ND
		O-desmethyltramadol	53239	LC/MS Pos Early	100006382	3045	250.18	73986-53-5	-	-	-	ND	ND	ND	ND	ND	ND	ND	ND	ND	ND	ND	ND	ND	ND	ND	ND	ND	ND	ND	ND	ND	ND	ND	ND	ND	ND	ND	ND	ND	ND	ND	ND	ND	ND	ND	ND	ND	ND
		O-desmethyltramadol glucuronide	52357	LC/MS Pos Early	100006383	2741	426.212	383891-39-2	-	-	-	ND	ND	ND	ND	ND	ND	ND	ND	ND	ND	ND	ND	ND	ND	ND	ND	ND	ND	ND	ND	ND	ND	ND	ND	ND	ND	ND	ND	ND	ND	ND	ND	ND	ND	ND	ND	ND	ND
		O-desmethylvenlafaxine	43334	LC/MS Pos Early	100004173	3253	264.196	300827-87-6	-	-	-	ND	ND	ND	ND	ND	ND	ND	ND	ND	ND	ND	ND	123521680	ND	ND	ND	ND	ND	ND	ND	ND	ND	ND	ND	ND	ND	ND	ND	ND	ND	ND	123938928	ND	ND	ND	ND	ND	ND
		omeprazole	38600	LC/MS Pos Late	100002725	717	346.122	73590-58-6	4594	C07324	HMDB01913	ND	ND	ND	ND	ND	ND	ND	ND	ND	ND	ND	ND	ND	ND	ND	ND	ND	ND	ND	5255539	ND	ND	ND	ND	ND	ND	ND	ND	ND	ND	ND	ND	ND	ND	ND	ND	ND	ND
		oxypurinol	41726	LC/MS Polar	100002489	1656	151.026	2465-59-0	4644	D02365	HMDB00786	ND	ND	ND	ND	ND	ND	ND	543132096	ND	ND	ND	ND	ND	ND	ND	ND	ND	ND	ND	ND	ND	ND	ND	ND	ND	ND	437467104	ND	ND	ND	ND	ND	ND	ND	ND	ND	ND	ND
		pantoprazole	38609	LC/MS Neg	100002808	4398	382.068	102625-70-7	4679	C11806	HMDB05017	ND	ND	ND	ND	15791465	ND	ND	ND	ND	ND	ND	209734	ND	ND	ND	ND	ND	ND	ND	ND	ND	ND	ND	157567184	ND	ND	ND	ND	ND	ND	3882883	ND	ND	ND	ND	ND	ND	ND
		quinine	39767	LC/MS Pos Early	100002968	3378	325.191	130-95-0	2728270	-	-	ND	ND	ND	ND	ND	ND	ND	8628748	ND	ND	ND	ND	ND	ND	ND	ND	ND	ND	ND	ND	ND	ND	ND	ND	ND	ND	20073636	ND	ND	ND	ND	ND	ND	ND	ND	ND	ND	ND
		ranitidine	38595	LC/MS Pos Early	100002735	2910	315.149	66357-59-3	3001055	D00422	HMDB01930	ND	ND	ND	ND	ND	ND	ND	ND	ND	ND	ND	ND	ND	ND	ND	ND	ND	ND	ND	ND	ND	ND	ND	ND	ND	ND	ND	ND	ND	ND	ND	ND	ND	ND	ND	ND	ND	ND
		salicylate	1515	LC/MS Neg	501	2195	137.024	69-72-7	338	C00805	HMDB01895	10803870	2133703	1371345	2068877	98420640	6282264	597500	16961390	231129696	438841	7659213	445219	841339	5509825	2742854	168571	64195744	299026	480187	5128309	16761484	1085668	2483849	24007402	22602794	522858	2547629	161408624	421750	971527	369224	487570	5236650	5781502	155384	67680440	199691	695815
		salicyluric glucuronide*	33384	LC/MS Neg	100001332	1463	370.078	-	-	-	-	808288	51169	80505	187707	10786309	926669	103602	927655	7755521	ND	1470867	ND	146179	42280	1.51451e+06	ND	8442420	ND	ND	219057	8650502	160399	152884	8744478	3740023	46569	173705	2703402	ND	52959	ND	84593	38944	2308164	ND	4836735	ND	37281
		S-carboxymethyl-L-cysteine	47897	LC/MS Pos Early	100002324	1490	180.033	638-23-3	1080	C03727	HMDB29415	179813	ND	456557	506596	468773	373066	434128	ND	969212	555848	242409	423920	721092	594924	396994	190048	702890	689564	1161837	447528	532114	298061	278180	231414	420484	670800	ND	1781042	1266112	ND	547832	800072	717621	ND	326986	337362	484527	1000578
		sertraline	39757	LC/MS Pos Late	100002804	1070	306.081	79559-97-0	68617	C07246	HMDB05010	ND	ND	ND	ND	ND	ND	ND	ND	ND	ND	ND	ND	ND	ND	ND	ND	ND	ND	ND	ND	ND	ND	ND	ND	ND	ND	ND	ND	ND	ND	ND	ND	ND	ND	ND	ND	ND	3808482
		Tramadol	53241	LC/MS Pos Early	100006381	3288	264.196	27203-92-5	33741	D08623,C07153	HMDB14339	ND	ND	ND	ND	ND	ND	ND	ND	ND	ND	ND	ND	ND	ND	ND	ND	ND	ND	ND	ND	ND	ND	ND	ND	ND	ND	ND	ND	ND	ND	ND	ND	ND	ND	ND	ND	ND	ND
		triamterene	42593	LC/MS Pos Early	100003968	3164	254.115	396-01-0	5546	D00386	HMDB01940	ND	ND	ND	ND	ND	ND	ND	ND	ND	ND	ND	ND	65316872	ND	ND	ND	ND	ND	ND	ND	ND	ND	ND	ND	ND	ND	ND	ND	ND	ND	ND	24344484	ND	ND	ND	ND	ND	ND
		venlafaxine	38623	LC/MS Pos Late	100002807	848	278.211	93413-69-5	5656	C07187	HMDB05016	ND	ND	ND	ND	ND	ND	ND	ND	ND	ND	ND	ND	28988164	ND	ND	ND	ND	ND	ND	ND	ND	ND	ND	ND	ND	ND	ND	ND	ND	ND	ND	34347968	ND	ND	ND	ND	ND	ND
		warfarin	43335	LC/MS Neg	100004175	3790	307.098	5543-57-7	-	-	-	ND	ND	ND	ND	ND	ND	ND	ND	ND	ND	ND	68144	ND	ND	ND	ND	ND	ND	64552248	ND	ND	ND	ND	ND	ND	ND	ND	ND	ND	ND	124682	ND	ND	ND	ND	ND	ND	33871904
	Food Component/Plant (phytochemicals)	2,3-dihydroxyisovalerate	38276	LC/MS Polar	100002417	1050	133.051	1756-18-9	677	C04039	HMDB12141	344284	356650	663310	2311372	435312	188885	324660	1.53318e+06	4053612	11412490	588527	321932	420243	190301	886107	390279	138968	493925	1231043	966779	832377	364180	1048413	1130253	140560	1440890	8375153	366363	477994	15361495	592453	280529	246561	404005	203027	282750	2.09518e+06	310991
		2-isopropylmalate	15667	LC/MS Neg	100000409	725	175.061	3237-44-3	77	C02504	HMDB00402	136373	158301	155042	129733	ND	331165	121443	174736	207827	568947	112765	ND	ND	132357	184521	212716	132973	659783	321470	ND	ND	ND	ND	131678	131437	90701	659215	566877	416025	300482	79127	284496	132469	357061	160138	433253	ND	ND
		2-keto-3-deoxy-gluconate	48141	LC/MS Polar	100005946	1900	177.04	17510-99-5	161227	-	HMDB01353	2482466	1042769	1913595	1181257	1.98317e+06	1291046	1100613	1568404	1.03691e+06	1.02752e+06	2187556	1147140	1.9831e+06	825045	1162503	2267135	1282162	454241	1477608	2353466	1.01635e+06	2035436	5978552	1675114	1044481	1128802	1130224	915971	1177916	1996608	1261777	1694737	800111	1793485	1961830	978525	1049441	1189634
		2-oxindole-3-acetate	40479	LC/MS Pos Early	100003109	2378	192.066	2971-31-5	3080590	-	-	373514	317843	1242608	306787	332610	350228	693778	69171	275310	ND	420987	ND	810887	258067	413341	ND	ND	ND	ND	476922	385196	56950	898094	1769494	274878	916122	ND	ND	ND	332868	ND	1884624	354277	433986	804294	ND	416147	ND
		2-piperidinone	43400	LC/MS Pos Early	100004295	1675	100.076	675-20-7	12665	-	-	37827656	18915300	15670125	15365853	18356688	91373512	15898667	12251638	23015756	91313080	24978476	21393016	23790006	17124756	31727200	31143296	16614131	20620552	209349840	16048918	33705156	16678042	12349386	18210540	135304320	11298711	22413072	16092326	136592864	14132395	23756936	12836318	27567072	19663384	90015912	19841888	17232188	134677520
		3,4-methyleneheptanoate	53026	LC/MS Neg	100006651	3807	141.092	-	-	-	-	335170	350063	971757	227655	283938	362614	218481	539184	403159	169487	191841	673414	342419	792823	1688778	433456	545437	247447	332869	280718	169844	363983	129693	382546	589230	571388	857303	351551	252908	219870	758587	351692	762122	585644	ND	520473	184590	824078
		4-allylphenol sulfate	37181	LC/MS Neg	100001868	3805	213.023	-	-	-	-	1799019	2803376	951256	6479298	11181407	590539	1483187	7691064	2531137	1386754	10087647	1161047	3660721	1048074	5289138	2292248	5138747	823229	1868989	2366342	11599285	2380557	18467716	20013226	1618994	8408585	17175428	5995586	21839260	18699982	4023854	4094695	4575159	12498722	16259165	5885459	6808911	8331992
		4-vinylguaiacol sulfate	48442	LC/MS Neg	100006126	3354	229.018	-	-	-	-	1125789	501782	ND	ND	12767	ND	43827	ND	ND	ND	ND	ND	238799	ND	85524	31276	ND	ND	3532477	ND	708259	ND	ND	82429	ND	68728	ND	1087423	146328	ND	ND	34878	ND	88425	30786	ND	99289	ND
		acesulfame	48569	LC/MS Neg	100006203	1581	161.987	55589-62-3	-	-	-	ND	ND	ND	ND	2957223	97916	833491	135831	1942317	ND	3219509	ND	1367832	ND	837163	ND	6376785	494752	300830	ND	ND	ND	111341	1647865	31907	ND	58342128	2993304	458701	ND	1314310	1663980	2746901	983983	ND	2172996	494607	549392
		alliin	41494	LC/MS Pos Early	100003473	1470	178.053	556-27-4	87310	C08265	HMDB33592	3752655	ND	1345862	463876	334534	188097	274221	760345	422643	2092182	1809961	2236087	430663	1313385	3322420	1201840	ND	109933	486997	1.58429e+06	4079529	1081344	142807	1063634	589717	277848	1.72975e+06	142730	457840	9810381	980007	1.99412e+06	3.66678e+06	2361823	876405	338438	2720414	1332997
		beta-cryptoxanthin	57591	LC/MS Pos Late	100001977	2560	552.433	472-70-8	6384256	-	-	12967738	40924572	8914485	35239456	8634534	11893138	11068680	17801044	38644040	20505312	12663351	24953142	13381586	83441800	95885328	24182174	8427929	7885563	7596779	11759725	44457516	7593910	18749004	10611217	9456943	10479846	18192748	22697226	19831856	49069876	22534432	10370320	90115208	73912024	21793766	6.78703e+06	8483272	13168935
		beta-guanidinopropanoate	35101	LC/MS Pos Early	100001411	2145	132.077	353-09-3	67701	C03065	HMDB13222	996675	600336	248256	2161234	454690	618789	1217596	433394	990441	379221	381535	347932	319692	1369954	488272	858219	295375	255318	1063801	549015	266762	314227	2101095	333773	336861	562411	329239	420799	828661	1156885	230122	876026	560026	366719	432703	397536	576433	924860
		betonicine	38100	LC/MS Pos Early	100002153	1012	160.097	515-25-3	164642	C08269	HMDB29412	ND	ND	942470	663595	811788	867118	2174464	ND	1160342	3805071	877880	875220	1.99229e+06	888089	ND	9292376	511651	1347510	ND	9570339	1316584	ND	999702	ND	2182228	1967412	ND	656164	57315012	ND	337030	ND	527838	ND	8587856	844923	621332	ND
		cinnamoylglycine	38637	LC/MS Neg	100002253	3127	204.067	16534-24-0	709625	-	HMDB11621	2326308	5055064	1077649	1896308	1966393	251656	3.31097e+06	2074825	5791490	ND	847002	3697684	2904083	100627	327451	ND	215764	ND	58517	736151	3380794	1827716	2931279	3805180	116036	3988451	2003127	3833284	ND	1558173	7301350	2.75827e+06	203794	161702	ND	72166	143149	141919
		dihydroferulic acid	40481	LC/MS Neg	100003432	1928	195.066	1135-23-5	14340	-	-	58798	ND	18412	45167	ND	128420	78669	71239	33042	242108	35213	38016	99809	463083	784583	92086	110288	177438	178341	63490	241551	78694	40496	ND	51407	72342	237871	152399	616792	85697	ND	95437	134477	331775	172044	155540	554943	55226
		ergothioneine	37459	LC/MS Neg	100002154	821	228.081	58511-63-0	3032311	C05570	HMDB03045	476141	773405	790986	1109266	302483	1108695	533132	827344	644342	433499	532902	504996	508377	1735750	714514	732376	454018	244103	1049011	526072	665616	845803	10706814	339421	995974	461319	500972	327323	664998	1.79346e+06	438255	449071	1562181	702624	877768	436567	633930	794000
		erythritol	20699	LC/MS Polar	100000846	1491	167.056	149-32-6	222285	C00503	HMDB02994	565932	419801	375113	403483	420156	480164	360543	912629	476020	926956	619112	364618	735786	324009	553400	474746	763892	851711	399616	442108	450931	332771	504392	519738	327940	352454	1564152	979955	539804	705519	405520	499484	369655	435589	389053	1196381	285643	311706
		eugenol sulfate	48715	LC/MS Neg	100006171	3782	243.033	95480-60-7	180632	-	-	379964	815034	1130646	49993	237807	241660	303215	910533	95485	135344	77943	258780	55031	624690	ND	168335	1504832	ND	ND	4292544	1619672	970178	81320	110933	100862	327844	679282	75136	3102641	28369	62833	321430	948413	258175	56261	199991	83705	ND
		ferulic acid 4-sulfate	47114	LC/MS Neg	100005389	1225	273.007	86321-29-1	6305574	-	HMDB29200	481194	ND	ND	31312	18227	30184	ND	ND	ND	ND	78455	ND	27027	279843	176535	23121	24464	ND	1520440	26025	144153	53881	ND	43679	ND	16261	41134	266985	64766	33471	ND	169348	137955	451800	74540	ND	381076	ND
		gluconate	587	LC/MS Polar	338	2922	195.051	527-07-1	10690	C00257	HMDB00625	2659878	20097318	11367266	23014322	35935148	23905776	24303456	33125012	29716872	1400060	28554514	19379392	20183266	24247424	30314006	32330898	11174430	1770062	ND	18768784	18487132	22249108	17687894	29488112	19268612	24048688	3710350	3.87328e+06	1465082	20786392	18066088	13009364	19891268	2568248	30583578	5185518	20262864	22706792
		homostachydrine*	33009	LC/MS Pos Early	100001550	1750	158.118	1195-94-4	441447	C08283	HMDB33433	3684024	2.52128e+06	17377926	1616593	1746767	7881565	2649750	2354029	5138732	4339203	6347363	4313497	2676815	2040337	2014542	2908927	771434	2511286	2513883	3978792	2427564	17566840	1785967	1240278	10049056	4798137	1247370	4789628	5475070	767274	3049727	1177104	4.1049e+06	2.44924e+06	1400592	1317609	5843310	3427362
		indolin-2-one	43374	LC/MS Pos Early	100004318	2575	134.06	59-48-3	321710	C12312	-	317949	641834	213975	91712	328315	85676	117533	296877	247706	69746	331459	210883	264163	148675	ND	ND	127365	137320	288090	498059	691613	176866	126134	239185	127170	85647	231395	251947	215814	53168	263577	137896	462232	194803	ND	132494	375359	120640
		isoeugenol sulfate	48997	LC/MS Neg	100006089	3893	243.033	-	-	-	-	ND	149635	ND	ND	ND	ND	ND	ND	ND	30034	ND	66088	ND	ND	ND	ND	73666	ND	ND	ND	170912	41578	ND	ND	ND	ND	ND	ND	ND	ND	ND	ND	ND	27330	ND	93926	ND	ND
		methyl glucopyranoside (alpha + beta)	46144	LC/MS Neg	100005864	1070	193.072	-	-	-	-	819999	1132471	598665	1595917	182833	649978	172998	1274515	809727	1115152	285761	450142	1979406	1141973	2090163	1228991	317362	91785	208482	299593	526128	363514	475670	1094616	181804	1579743	1731088	610907	619333	1896439	643135	1539812	532752	2039727	2518811	605681	191076	145526
		methyl indole-3-acetate	1584	LC/MS Pos Early	1104	3339	190.086	1912-33-0	74706	-	HMDB29738	183265	208061	301117	237218	474471	1062131	107409	369756	271632	500819	272354	163104	560435	146249	343850	362954	518500	402386	227554	455384	459835	446987	317088	532484	1208993	165082	408355	203326	742040	217541	444666	422789	220035	245565	962058	468917	731923	276035
		N-(2-furoyl)glycine	31536	LC/MS Neg	100001086	1525.8	168.03	5657-19-2;5657-19-2	21863	-	HMDB00439	4989439	241047	90262	190320	212016	177702	180989	789603	133178	ND	153912	152680	232637	66132	221774	109679	74933	118322	16187886	299069	352468	174960	97559	338668	ND	112471	268060	4473031	45361	137985	96777	301937	ND	347651	109793	230205	179771	168053
		N-acetylalliin	45404	LC/MS Neg	100005367	1467	218.049	-	-	-	-	867352	ND	389689	323806	195729	ND	ND	207196	162738	305226	403874	292301	31768	403226	1466383	154124	ND	ND	66043	1586121	472387	400669	40971	794372	ND	ND	169999	ND	76002	2.06391e+06	92188	219269	654386	1438901	172533	99661	563130	176039
		piperine	33935	LC/MS Pos Late	100001267	1168	286.144	94-62-2	638024	C03882	HMDB29377	11030583	29387352	68855632	175724656	72092064	46103560	223510784	15891492	12098662	46446216	52292120	17189916	4613553	3513304	75323448	73225640	36185428	6051772	25487952	50514160	208569328	83971000	94088144	109521344	88257344	50217248	24345416	31706082	35080536	106086544	19874010	38315380	344161728	93181656	65180396	31774244	116686152	52702724
		pyrraline	48428	LC/MS Neg	100001767	2304	253.119	74509-14-1	-	-	-	450741	157671	99766	58475	496093	253356	587424	205509	245480	157228	174160	338151	171008	270142	484162	157830	81688	130030	1343025	412640	540103	155465	45554	298226	198833	258088	108557	167560	350886	202821	49151	268948	233541	183505	96261	306322	361778	56312
		quinate	18335	LC/MS Polar	100000442	2432.9	191.056	77-95-2	6508	C00296	HMDB03072	40434360	957387	53762656	15196686	46591816	50860948	12041674	89844368	78952968	1483313	33738692	6007174	733309	341660	50603636	491249	219706	32892266	124057136	31249762	4102692	53610804	16727868	65086616	416441	23693434	48450208	100138496	2125567	854707	4346064	1700615	323380	52419648	716628	5512877	18663120	24561526
		retinal	40807	LC/MS Pos Late	100004088	1666	285.221	-	638015	C00376	HMDB01358,HMDB06218	152956	116396	175589	205206	313669	130629	136506	185944	124762	63732	103938	217709	182937	146865	205329	202545	141461	39770.4	100106	168281	111889	154660	539066	211366	275432	204197	104955	64994	109877	237245	190742	164899	202060	152274	314990	174156	135052	192716
		saccharin	21151	LC/MS Neg	100000870	1999.7	181.992	81-07-2	5143	D01085	HMDB29723	ND	313740	111262	193109	417801	676794	ND	738830	326550	90518	483554	169661	ND	159885	366190	ND	ND	ND	134539	ND	ND	234442	308280	1060691	ND	ND	328112	152312	ND	ND	ND	ND	358110	3.40895e+06	ND	232128	316934	296623
		S-allylcysteine	43239	LC/MS Pos Early	100004509	2690	162.058	21593-77-1	98280	-	-	1252975	ND	1591244	1756692	351870	ND	266276	1095347	674204	4751561	1106418	1706167	100080	4508218	5532703	1219605	ND	240300	366041	4552361	1516118	2198206	94334	1135816	804652	ND	816678	ND	232730	4548629	481637	664829	3447717	2369851	826897	294582	6947977	2384850
		stachydrine	34384	LC/MS Pos Early	100001296	1440	144.102	4136-37-2	115244	C10172	HMDB04827	802799232	1395998848	837335616	255651232	14560935	214594272	249615328	1374376064	455597248	435118880	281471328	129622856	241991088	699774656	996629184	788612544	471369536	9514281	18866654	134464560	705896256	785920192	110203184	788519360	54524160	91934016	1563980544	80282200	437725216	1219016576	249892768	369574976	219428032	1468874240	943580160	425997248	59215808	16058738
		tartarate	15336	LC/MS Neg	100000295	615.3	149.009	87-69-4;6106-24-7	444305	C00898	HMDB00956	615182	540756	ND	535078	134245	108930	358580	281886	773198	ND	299217	793746	8.34483e+06	494134	435764	176546	ND	ND	594027	1429096	482844	228582	544324	409434	77672	473950	ND	ND	206776	863251	225653	1.03636e+06	474334	494916	374293	ND	ND	492021
		theanine	22206	LC/MS Pos Early	100000784	2180	175.108	3081-61-6	439378	C01047	HMDB34365	ND	1489896	ND	ND	ND	ND	1715990	ND	ND	12288576	ND	114599	ND	ND	ND	ND	345488	ND	130958	11518335	966919	1701036	ND	ND	3127292	3326298	ND	15455556	17673802	532047	ND	ND	ND	ND	1728167	206503	1294706	ND
		thymol sulfate	36095	LC/MS Neg	100001757	4410	229.054	89-83-8	-	C09908	HMDB01878	2395662	29801950	1332018	444453	44332452	1381572	465210	3719037	2423421	1456509	5626576	404730	1352219	77535752	17247432	10641392	593395	1627280	4.53739e+06	693549	5479702	19573938	9052386	104751040	158336	1960285	7592289	2816816	14801351	44665688	3927515	813736	38942876	37608860	8643928	1263901	3.76251e+06	18497716
		umbelliferone sulfate	48674	LC/MS Neg	100006282	2442.8	240.981	69526-88-1	129659	-	-	101592	97819	ND	ND	188156	68192	401803	130504	180080	ND	104491	ND	ND	19527	ND	480133	316201	ND	308594	64190	443566	338056	19564	130692	182931	183094	1034342	44639	62497	45748	ND	65150	ND	214586	718914	564470	ND	192010
	Tobacco Metabolite	cotinine	553	LC/MS Pos Early	848	2213	177.102	486-56-6	854019	-	HMDB01046	ND	55320012	ND	ND	ND	ND	ND	ND	ND	ND	ND	ND	ND	ND	ND	ND	ND	ND	ND	ND	58384376	ND	ND	ND	ND	ND	ND	ND	ND	ND	ND	ND	ND	ND	ND	ND	ND	ND
		hydroxycotinine	38661	LC/MS Pos Early	100002717	2030	193.097	34834-67-8	10219774	-	HMDB01390	ND	1441895	ND	ND	ND	ND	ND	ND	ND	ND	ND	ND	ND	ND	ND	ND	ND	ND	ND	ND	1426780	ND	ND	ND	ND	ND	ND	ND	ND	ND	ND	ND	ND	ND	ND	ND	ND	ND
	Xanthine Metabolism	1,3,7-trimethylurate	34404	LC/MS Neg	100001397	1985	209.068	5415-44-1	79437	C16361	HMDB02123	571452	ND	66581	270280	2659439	95164	408017	104786	57675	63879	186274	103936	2071272	ND	286027	428874	335013	17702	2421933	656256	ND	ND	286307	1099736	217006	715065	ND	548098	108708	111228	62073	1106172	ND	356371	ND	351259	134729	646053
		1,3-dimethylurate	32391	LC/MS Neg	100001106	1671.4	195.052	944-73-0	70346	-	HMDB01857	474910	120161	1928927	563075	1494002	ND	685873	233743	ND	393896	254530	192641	1489340	ND	332845	508703	513048	175107	976326	399408	29090	1161778	491396	699918	91273	1215394	ND	111764	764465	126401	106275	485064	ND	497436	97860	562364	474512	799569
		1,7-dimethylurate	34400	LC/MS Neg	100001399	1578.6	195.052	33868-03-0	91611	C16356	HMDB11103	1650116	391002	1791514	1793687	5160772	293412	2866465	860854	250666	465738	985352	666177	4369311	ND	3145026	2587852	2292467	258471	5295199	5363034	149059	1085001	1798061	3939199	620320	3.85793e+06	ND	512446	1.8655e+06	797210	309042	1791049	ND	3207222	473402	1682427	2249231	4580584
		1-methylurate	34395	LC/MS Pos Early	100001400	1461	183.051	708-79-2	69726	C16359	HMDB03099	130249	165734	172960	ND	190376	175858	ND	ND	98224	ND	102948	253721	351844	ND	423198	ND	271518	ND	227766	81545	160342	239314	ND	ND	249919	107731	82335	236478	ND	ND	140431	297115	134137	309052	ND	198036	71159	136145
		1-methylxanthine	34389	LC/MS Neg	100001405	1568.8	165.042	6136-37-4	80220	C16358	HMDB10738	1419582	376734	3064291	1740156	2659020	ND	3.42216e+06	2.87557e+06	297037	1.40488e+06	414993	382013	1689639	ND	3511241	1.57115e+06	1807606	569628	1.98631e+06	2602368	164657	1971835	1.72512e+06	3133384	655220	5441105	ND	843561	3204665	837505	348513	646920	ND	3077934	452889	1697186	1385128	1.75988e+06
		3,7-dimethylurate	34399	LC/MS Neg	100001398	1418.2	195.052	13087-49-5	83126	C16360	HMDB01982	52725	636166	65206	284514	778309	117150	255239	340147	29095	23611	229323	67596	937359	ND	60031	59217	38697	ND	540239	76410	90291	79417	77663	234964	526031	244516	ND	ND	83202	260850	79244	667769	79321	158634	21230	68142	238517	229873
		3-methylxanthine	32445	LC/MS Pos Early	100001108	1415	167.056	1076-22-8	70639	C16357	HMDB01886	2904576	976965	6113175	3.66366e+06	5513001	623708	6014866	5094808	443305	5647973	1532848	676214	3728208	123780	6504319	2834813	4238979	1.74179e+06	5528027	5564727	421186	3658952	3860220	5981720	1213463	10160194	458255	3812834	7.19372e+06	1202886	653734	1514782	504552	4852787	706524	4501862	2772825	4228095
		5-acetylamino-6-amino-3-methyluracil	34424	LC/MS Polar	100001403	1710	197.068	1196153-01-1	88299	C16366	HMDB04400	4628736	4957764	13242651	5386763	13907914	418746	9755523	2662460	3064802	12062245	4483105	4194850	9079591	ND	11101098	12179687	6842831	7.58222e+06	25656288	11387325	2090360	9712817	4525665	14513236	877845	18462760	200015	9404710	12655184	1577877	2467022	2627945	53196	10409812	2294027	7520416	11212178	18133932
		5-acetylamino-6-formylamino-3-methyluracil	34401	LC/MS Polar	100001402	1424	225.063	85438-96-6	108214	C16365	HMDB11105	367438	1.59912e+06	3335243	1145556	2917928	49287	1333123	578563	512337	ND	420622	1179986	1536110	ND	2078241	6073388	268633	ND	10811371	2318013	781588	1923490	509349	2404659	169298	3.85296e+06	ND	256022	ND	405087	600972	285784	ND	1248653	1268711	ND	3465876	7.25879e+06
		7-methylxanthine	34390	LC/MS Pos Early	100001396	1350	167.056	552-62-5	68374	C16353	HMDB01991	437936	2869505	1823357	1902290	5430011	356138	879688	2792128	ND	1668117	1176443	896039	8909751	92184	1.41965e+06	480858	945992	1097350	8433467	1516843	467070	1532807	661094	2846180	1659139	1160150	ND	822377	1652539	1799335	1623435	4176300	716604	2.48981e+06	ND	1512225	2777058	4284804
		caffeic acid sulfate	53254	LC/MS Neg	100009337	870	258.992	-	-	-	HMDB41708	335005	ND	ND	58006	ND	ND	ND	ND	22447	ND	ND	ND	ND	204236	239680	ND	ND	ND	1886537	38864	121924	ND	ND	27834	ND	21224	ND	1314207	110497	ND	ND	255921	ND	1.03076e+06	ND	ND	58563	ND
		caffeine	569	LC/MS Pos Early	849	2106	195.088	58-08-2	2519	C07481	HMDB01847	38229948	1893669	4642553	11483511	82050856	9049682	34659384	6175867	1341260	4967337	5251065	2957771	80703416	ND	25827752	22472192	24035104	2847132	246319424	62303392	717283	1.94872e+06	14745714	48076076	18672108	41402504	526836	56834684	7829426	11653230	877469	40609400	ND	20679948	3681081	30659218	11440007	75558112
		paraxanthine	18254	LC/MS Neg	100000453	2279	179.057	611-59-6	4687	C13747	HMDB01860	1338421	429705	1414727	1800098	5272628	686661	3483760	652145	425345	813820	868666	396624	3017028	91001	2783479	1.9902e+06	1639920	729388	5405991	3.90511e+06	163957	972624	1821806	3.90633e+06	960707	5333335	ND	1912694	1428872	766193	175974	1384179	77321	1.94988e+06	515355	2018289	1383207	3174712
		theobromine	18392	LC/MS Pos Early	100000445	1600	181.072	83-67-0	5429	C07480	HMDB02825	23625504	296973728	30065828	101772896	458946272	66974996	82732672	160575728	24751852	31974984	64007036	33678556	307168800	7596649	40147120	21702656	20772244	35500408	341802880	63672388	24139980	16663382	54549640	183444816	268540192	75854040	2268623	31563062	33556024	160189904	50740084	230554944	55242036	81623960	5979265	56232292	101204208	233953888
		theophylline	18394	LC/MS Neg	100000437	2356.9	179.057	58-55-9	2153	C07130	HMDB01889	3352444	928268	4563838	5.33325e+06	13473233	1046282	8.26503e+06	1941230	1107877	3964385	1643061	2237525	12635913	ND	6396194	5604133	5179789	2612048	15195635	9786515	214094	2564302	5220296	8395398	1805841	11942353	ND	3177039	5057426	1714807	968212	4682778	ND	7265594	897297	6908867	5492511	11885500
*Indicates tentative metabolite identification and no purified chemical standard.
[truncated: 20 more columns]
