# Supplementary material for: Plasma and Urine Metabolite Profiles Impacted by Increased Dietary Navy Bean Intake in Colorectal Cancer Survivors: A Randomized-Controlled Trial
Source: Oxford University Press journal article supplement (doi:10.1158/1940-6207.capr-20-0270), 2020-12-24
Supplement: 19406207capr200270-sup-244212_4_supp_6781603_ql74yj.xlsx [file 19406207capr200270-sup-244212_4_supp_6781603_ql74yj.xlsx]

## Sheet: Supplementary Table 4
Supplementary Table 4. Urine metabolites classified into metabolic pathways for all participants.
CHEMICAL CLASS	METABOLIC PATHweeksAY	BIOCHEMICAL	COMP_ID	PLATFORM	CHEMICAL_ID	RI	MASS	CAS	PUBCHEM	KEGG	Group HMDB	Control Baseline	Control Baseline	Control Baseline	Control Baseline	Control Baseline	Control Baseline	Control Baseline	Control Baseline	Control Baseline	Control Baseline	Navy Beans Baseline	Navy Beans Baseline	Navy Beans Baseline	Navy Beans Baseline	Navy Beans Baseline	Navy Beans Baseline	Navy Beans Baseline	Navy Beans Baseline	Navy Beans Baseline	Navy Beans Baseline	Control 2weeks	Control 2weeks	Control 2weeks	Control 2weeks	Control 2weeks	Control 2weeks	Control 2weeks	Control 2weeks	Control 2weeks	Control 2weeks	Navy Beans 2weeks	Navy Beans 2weeks	Navy Beans 2weeks	Navy Beans 2weeks	Navy Beans 2weeks	Navy Beans 2weeks	Navy Beans 2weeks	Navy Beans 2weeks
Amino Acid	Alanine and Aspartate Metabolism	alanine	1126	LC/MS Pos Early	811	1700	90.055	56-41-7	5950	C00041	HMDB00161	116634000	143237904	62130888	91492704	75913648	62172380	141877792	120690816	46127848	154964160	97852400	82058200	135754224	97000136	35706712	95992536	67470136	213087328	92371256	112855248	113991448	150123648	103134352	96376248	84341024	53986452	92794448	65399716	50714168	110929680	73893904	67918416	111620160	83219384	39396608	209651216	88400736	148676240
		asparagine	512	LC/MS Pos Early	917	1225	133.061	70-47-3	6267	C00152	HMDB00168	96230456	122217248	109380512	76024184	62738536	34384844	117414728	85737160	45654100	203364256	181116864	90049672	106932816	96360304	57324296	95774256	57132332	189107296	53946984	39725712	97202504	121293616	124010672	88775744	104719672	36894824	115193200	62862376	46579680	66403288	100956920	97007520	106492704	79631320	74452288	156456880	73617168	123730024
		aspartate	443	LC/MS Pos Early	234	1165	134.045	56-84-8	5960	C00049	HMDB00191	3334624	2857524	1645547	3910409	1687931	1127746	2414678	2686194	1163691	4371510	3640792	2212947	2669292	5237244	1435916	2587598	1013873	4170914	2832953	57720192	2171178	5098571	1.99797e+06	4634854	4509359	1389901	2553068	2452992	1301029	3.67662e+06	2563534	1.8108e+06	5145307	1212463	2448197	3.29932e+06	1715963	2.02071e+06
		N-acetylalanine	1585	LC/MS Neg	1110	861.2	130.051	97-69-8	88064	C02847	HMDB00766	1226378	1197555	1897279	602313	1044995	898597	1821363	1322762	502591	2557293	2807608	1021785	676246	1107394	562459	830599	544892	6378775	1542897	1236048	693705	2148913	1955813	571448	1039389	294897	808682	562253	889337	779963	1553415	618111	1421735	1374729	359468	685984	540691	3192625
		N-acetylasparagine	33942	LC/MS Neg	100001257	718.3	173.057	4033-40-3	99715	-	HMDB06028	24490246	26183714	33306878	40592368	29738430	1329162	16635379	11584316	12949026	69525240	24285406	19529246	29021542	23801032	19454482	10798383	12487642	79805800	17015664	36237676	28792174	18669488	56188740	43013824	22673882	1177217	13100633	7.28822e+06	14192801	54709720	14827391	11920607	23042576	25697374	21704872	18032228	11960238	52510088
		N-acetylaspartate (NAA)	22185	LC/MS Neg	100000787	620.5	174.041	997-55-7;997-55-7	65065	C01042	HMDB00812	17182858	29568192	28923420	36793084	19593684	12191428	17914496	33045464	20020968	53541556	33061488	25746312	32384102	32244488	11609854	20102732	19078512	59093456	38900388	25511712	14242397	30739084	31302656	38088880	26620036	12325618	16748721	25331160	21067226	31953356	28723094	19952182	30583468	19036370	18281052	31962104	18601384	39732912
		N-carbamoylalanine	52340	LC/MS Polar	100006369	2022	131.046	77340-50-2	426409	-	-	771565	586528	1.02624e+06	403202	600134	191039	657862	1.16984e+06	227587	1.32481e+06	911204	516312	293342	1.29934e+06	371404	114201	216621	2.29078e+06	1.46718e+06	1865915	601216	1.01081e+06	1826619	391571	518164	17424.7	584766	1.08825e+06	244041	449995	745069	391859	881918	509995	687682	171039	974760	1.5018e+06
	Creatine Metabolism	creatine	27718	LC/MS Pos Early	1221	1947	132.077	57-00-1	586	C00300	HMDB00064	1039321984	1164670464	584467456	6260067840	1569215872	1182657408	447856128	1786551040	1220267008	1616729472	1862767232	1433992704	2416313856	1331393408	548289344	722369728	461084640	1350771968	400601280	1509125376	1114314368	1101562880	780301760	5347287552	2751074304	1334873472	323643712	1875318784	1455876352	758553024	1291833088	588445888	1402286848	3064552192	738242304	1026785664	635804608	889786752
		creatinine	513	LC/MS Pos Early	275	2055	114.066	60-27-5	588	C00791	HMDB00562	4347316736	5776252928	7329141760	5568662528	4386593792	3371801600	5230270464	5685530112	3167998208	8323527168	7396259328	5660373504	5227235840	7043522560	3669290752	6001224192	5319421952	8500030464	6347256320	5316683264	4369988096	5859160576	7241671680	5271827456	6076206592	3870867712	5047541760	4958536704	3593700352	5214063104	5744831488	4206538496	6874923520	4225642752	4707247104	7514251776	5387041280	6807563776
		guanidinoacetate	43802	LC/MS Polar	344	2884	116.047	352-97-6	763	C00581	HMDB00128	7.90152e+06	12458574	5.39642e+06	35402252	9577039	6192517	7023932	10902607	4.8662e+06	22377044	11619252	9605304	22056982	8796428	2.34951e+06	10112010	7288533	38222160	11549781	5830781	8954870	22157772	6.18064e+06	29852608	14226846	14702347	5.93745e+06	6.15419e+06	5.99526e+06	9474346	7027862	4316258	7515283	18147490	4.4083e+06	13393944	5.88202e+06	17812308
		N-methylhydantoin	40006	LC/MS Neg	100002557	1425	113.036	616-04-6	69217	C02565	HMDB03646	467835	500156	ND	283126	288470	ND	374703	788326	ND	1769619	439377	ND	ND	303805	ND	ND	ND	600793	1299974	583532	ND	871010	999156	153769	1409833	ND	394932	301085	ND	288315	359297	ND	ND	724772	112892	ND	255706	540292
	Glutamate Metabolism	4-hydroxyglutamate	40499	LC/MS Pos Early	100002544	1141	164.055	2485-33-8	439902	C03079	HMDB01344	1213781	866579	590031	1060969	1822267	432180	2902176	1.64636e+06	591221	2367940	1414093	1547368	1.56676e+06	2131406	352083	2.11475e+06	936016	1842045	802164	2025383	1650240	1691022	454869	897053	1213207	595553	1713158	647814	258812	2143157	1454667	522152	2449556	1007837	555201	3050457	1259588	629217
		beta-citrylglutamate	54923	LC/MS Neg	100003271	530	320.062	73590-26-8	-	-	-	15942479	21447086	50089848	33806472	11929770	15407516	21028628	32409722	5177107	46931396	36350976	18345364	20558568	38791796	9222553	20994572	14826710	67557472	32553960	30820500	15415203	24411978	41158660	25979522	14437127	17766130	20769986	24797086	6960611	18537262	23695580	10630345	31515930	11470329	13254363	26517542	20525368	45957464
		carboxyethyl-GABA	40007	LC/MS Pos Early	100003260	2085	176.092	4386-03-02	2572	-	HMDB02201	3819634	2802004	2510650	1744898	2340519	2.61696e+06	2760163	2967887	2.05437e+06	4142558	5.34524e+06	3262130	2320561	2.91578e+06	2481923	2101567	2024618	5224075	2126812	2823665	3036215	2580616	2087742	1953241	2455902	1895204	1404893	2222758	1636961	3.22945e+06	3443026	2508031	2.78854e+06	2068369	1870666	2454993	1747722	3579500
		citramalate	22158	LC/MS Polar	100000998	3201	147.03	6236-10-08	1081	C00815	HMDB00426	451438784	136132320	705080192	644247296	262701120	378499488	458309248	1337234176	37194460	1185187840	1046674304	174431872	115358840	705570432	43841236	640485376	431007616	704741504	211287872	605360192	305301760	585140160	130122304	700289600	572642240	238723504	267765664	266022816	46415948	228575664	901622976	102046352	790671680	115608496	153805072	942116224	553981696	605251904
		gamma-aminobutyrate (GABA)	1416	LC/MS Pos Early	141	2048	104.071	56-12-2	119	C00334	HMDB00112	1076650	1321102	1725717	889349	1279783	1183772	830073	977013	1377480	1903383	1804795	1.80277e+06	1369438	1562386	1153539	1375503	1433312	1801078	961522	1551631	904916	1193439	1.67944e+06	948347	1681381	1451987	677992	709213	1.38433e+06	1420987	777320	1585725	1078070	915133	1265858	1634702	1436377	1968770
		gamma-carboxyglutamate	38754	LC/MS Pos Early	100002679	903	192.05	56271-99-9	40772	-	HMDB41900	37306504	45968600	71151880	25300932	35453600	27647820	26327426	44551828	10211043	69952744	52392652	41466144	43675728	71305288	20117284	50167588	17611364	59393304	28121880	55187432	29634616	42948488	48360868	22002732	73957976	30255908	27872044	40326828	9485169	22395604	52124576	19241824	71358424	17129492	39531328	51241192	39947944	44091328
		glutamate	57	LC/MS Pos Early	561	1500	148.06	56-86-0	611	C00025	HMDB00148	30073068	35508732	28763016	27053182	29735602	7667258	24167484	38205632	16392599	35740204	37529912	32491330	19830812	45965300	16687436	43547400	14299150	50309256	32039788	175686432	20381254	24630028	26412840	30604698	53347040	9549130	23966288	20721864	20883720	33857648	25800344	26078152	22569740	15882873	28949276	73332024	21907412	40755948
		glutamine	53	LC/MS Pos Early	563	1291	147.076	56-85-9	5961	C00064	HMDB00641	327458496	690911296	431542400	408533824	219940112	105525496	583408256	260928720	111176736	935992832	539085056	316630016	428988864	458014336	129088744	391580832	251049328	1354809984	286813120	247971792	240759696	646076288	444065696	416524768	272749216	140203696	557193792	152294544	132186136	338073120	365116736	296258944	656568000	282006336	195141664	686712768	328958272	747161408
		N-acetyl-aspartyl-glutamate (NAAG)	35665	LC/MS Pos Early	100001612	1035	305.098	3106-85-2	5255	C12270	HMDB01067	4023869	5850507	13225615	4774281	1626311	3178709	3822968	4969699	1164701	12785484	5849908	3425916	6698162	7067995	2097837	4091236	3283347	14793128	5436525	4175929	3284640	6318647	9260310	4163271	2516473	4077253	3.6745e+06	3103260	1677138	5629689	2593498	2265259	5.42088e+06	3988023	3346035	5405745	2809837	9209013
		N-acetylglutamate	15720	LC/MS Pos Early	100000282	1050	190.071	5817-08-03	70914	C00624	HMDB01138	33076942	25257932	43794612	39587128	25947150	11250443	13046707	32213792	12420361	58650348	34318828	17712938	29921000	30131938	10093859	25773440	18664534	79708336	26850476	39282880	26069934	23834676	38086716	39260024	30200920	12008713	11945821	22618936	15181320	31434660	22855036	14870630	23684342	18779852	12472646	31268986	18778082	50749900
		N-acetylglutamine	33943	LC/MS Pos Early	100001253	845	189.087	2490-97-3	182230	C02716	HMDB06029	26808092	38271924	41072224	47755072	37076376	4268987	34072776	14002576	16533143	115261232	38913456	29314184	38928848	35122088	27448276	22065676	25294900	131609432	23639136	45111324	26474640	33554728	40704344	65999772	55662912	3781708	24915964	15566472	22228962	43918048	22769180	22495530	46670428	25840096	38616204	32175998	27158308	84040952
		N-methyl-GABA	39577	LC/MS Pos Early	100003152	2109	118.086	1119-48-8	1550042;70703	-	-	33781732	6837086	12003087	33898692	8668271	23102728	7264639	26734648	31914076	31101316	31813852	16436524	33705176	17408672	15694837	16053832	4012822	47085352	46878384	18997644	14061246	33192264	17554812	9961636	11294685	8334622	3178701	11903167	5078765	7352733	66976276	5222942	8385478	55316080	11940389	37816288	ND	37418748
		N-methylglutamate	31532	LC/MS Polar	100001131	2900	160.062	35989-16-3	439377	C01046	-	3.68577e+06	885278	2011914	1423799	289685	133180	476112	2.92726e+06	258027	1.66612e+06	4897065	496820	2.25129e+06	1.00496e+06	3.08082e+06	5.47309e+06	844981	ND	206590	222059	582923	2346753	1.81759e+06	317108	4.6076e+06	ND	416656	6.07087e+06	ND	8438048	4642703	452452	415056	359034	5276928	5.6561e+06	1.07001e+06	489541
		pyroglutamine*	46225	LC/MS Pos Early	100001540	1900	129.066	2353-44-8	134508	-	-	255668464	312786592	101134800	301322592	245997600	85993544	262185680	237000064	124082208	529547328	364756192	401783168	377162848	401832352	253065360	355373248	386185824	1084228864	214062864	228991808	439920480	432958976	173086784	298863968	185166224	181954000	203039696	147835392	140090304	302439840	262051632	297995520	648033792	219362576	295432896	459975520	316145344	522278272
	Glutathione Metabolism	5-oxoproline	1494	LC/MS Neg	1021	738.5	128.035	98-79-3	7405	C01879	HMDB00267	150553568	247000464	440233216	224655008	153611472	77384336	131022096	274772224	80408992	307163360	261314864	151086208	158128304	273782272	74745496	170850992	109782360	493963840	209281264	215952160	126362648	209948176	421697024	178531696	160636752	78431160	133201368	161597296	103511488	183527536	191130144	89890144	223379696	106246480	114628856	237323008	111921536	275992704
		cysteine-glutathione disulfide	35159	LC/MS Pos Early	100001437	2465	427.095	13081-14-6	4247235	-	HMDB00656	ND	177033	618122	ND	ND	308510	ND	273937	ND	609542	ND	ND	755644	880667	ND	ND	ND	607381	628425	ND	ND	1170243	689152	ND	180226	453749	ND	ND	ND	ND	205873	ND	232554	ND	ND	ND	ND	326778
		cysteinylglycine	35637	LC/MS Pos Early	278	2132	179.048	19246-18-5	439498	C01419	HMDB00078	ND	ND	ND	977675	ND	ND	ND	ND	ND	ND	ND	ND	ND	ND	ND	428461	ND	901695	769407	ND	ND	ND	ND	1720216	ND	ND	ND	ND	ND	ND	ND	ND	356973	ND	ND	1112773	2171434	996336
	Glycine, Serine and Threonine Metabolism	2-methylserine	53229	LC/MS Pos Early	100009246	1652	120.066	-	94309	-	-	22497276	16104963	10157837	9559479	11549270	10275537	13953697	20011900	4951867	16975370	12090536	10365072	16837220	11198127	8045031	17752798	12275110	22421784	9568707	12103473	21331818	21204600	11571240	10811523	16139018	20067244	10129508	15166863	5.98981e+06	13329784	8551195	8.01e+06	8979537	10687607	10196145	21069680	9467323	16458586
		allo-threonine	15142	LC/MS Polar	100000272	2511.1	118.051	28954-12-3	99289	C05519	HMDB04041	1.08139e+06	2.30555e+06	2.79263e+06	2.91275e+06	1528712	634877	977631	1.23792e+06	593622	2729928	2.79558e+06	1.39754e+06	2.20284e+06	3.24457e+06	855406	1.65955e+06	4073716	1.54108e+06	1.41845e+06	1.25486e+06	1.63487e+06	2.16949e+06	2.46678e+06	3224095	2767854	1.01266e+06	6.30323e+06	1.36585e+06	822936	1.54219e+06	2.24879e+06	1.00368e+06	2357803	1547025	1.17746e+06	2.92047e+06	2.50364e+06	3.15456e+06
		betaine	3141	LC/MS Pos Early	799	1064	118.086	107-43-7	247	C00719	HMDB00043	526862464	1029057920	766736768	1475939968	660185280	274489024	709158464	1293641856	212900304	940143040	1314310144	818069248	643888704	722458496	922587456	522467232	926709632	1195606016	768665344	733406720	512572224	1138918400	743585280	1625085440	783800768	324017664	674058240	928355968	253164128	682766976	925687104	817804928	1004801408	661651392	1066438400	974474112	830185536	977153664
		dimethylglycine	5086	LC/MS Pos Early	806	1104	104.071	1118-68-9	673	C01026	HMDB00092	144623552	194967360	67006532	233395744	164535392	47458592	106433216	140932464	51270264	174880400	172665424	181563760	303686976	82918856	123935072	123076296	143648560	185122848	61212032	83347640	176129184	172042112	77202376	223166608	137242960	60981076	86329008	92167632	83665216	85446840	118620400	134959168	133808856	354393152	126492024	172397312	126605048	138411728
		glycine	58	LC/MS Pos Early	340	1375	76.0393	56-40-6	750	C00037	HMDB00123	235295744	201144928	213836592	148388240	69363520	33976200	202852096	81811888	41674768	263797792	157402192	125808592	159861296	172252208	51377820	86531080	122760872	368999328	159947824	78005896	255305296	205024400	316757088	167564512	90821792	54755056	159979744	42059436	49622936	130804304	103031544	110946624	342003328	105395480	55631216	174916208	103159920	242482704
		N-acetylglycine	27710	LC/MS Neg	100001006	731	116.035	543-24-8	10972	-	HMDB00532	249320	3849998	3745939	827174	1057037	ND	1338320	1.04358e+06	412323	4015226	1265812	793262	2456225	1581269	318483	741924	282320	9535211	1132524	483848	569161	832000	1.68648e+06	1.37551e+06	ND	444427	1524908	ND	1083781	1146245	1763236	1017323	4630474	2365081	231891	3442737	331012	6736339
		N-acetylserine	37076	LC/MS Polar	100001851	2000	146.046	97-14-3	65249	-	HMDB02931	12469700	20205944	17458148	12795178	13811191	2539900	10980748	9531501	4483132	25339412	11666305	18079114	17578196	20678408	5.84532e+06	15669272	7.90793e+06	32189460	9002930	10739517	17152054	16858296	16340177	12674903	17429144	2692006	9158641	8.38835e+06	5.61321e+06	14688674	9172961	12002644	20812268	22118510	5.52232e+06	28187634	7.84837e+06	30237118
		N-acetylthreonine	33939	LC/MS Neg	100001274	821.6	160.062	17093-74-2	152204	-	-	53275228	52116516	70425528	61197420	36726840	12332919	39836476	75036008	17354792	71348096	100031392	46422116	62811800	69971056	44420464	54458588	33920944	109215144	55470036	32482518	58797376	64922492	47460756	54055680	74625504	19251810	35551652	48355848	11709185	37594492	55884720	36584552	79344240	32450018	60908768	102871240	39593664	76946848
		sarcosine	1516	LC/MS Pos Early	1023	1280	90.055	107-97-1	1088	C00213	HMDB00271	906369	1.64945e+06	1203853	2395164	981091	ND	496593	2279663	ND	2624642	2268111	1459863	2519136	925843	ND	949507	1313461	2289404	1500163	333774	1.02098e+06	1.82044e+06	2.09619e+06	2200458	1355204	ND	ND	1186228	ND	ND	1089795	ND	2.00429e+06	2219836	1416711	2136146	1383998	1.67824e+06
		serine	1648	LC/MS Pos Early	503	1239	106.05	56-45-1	5951	C00065	HMDB00187	83562288	165555456	166072528	84775328	59825340	51333072	143856736	67062100	29923640	212801216	124208032	104105352	136447216	109862888	42603308	94719216	76895392	244468416	861242	83429008	84022864	140310864	162770688	82809424	45866844	55422424	132170744	37850144	45633160	112846360	83092096	92464824	128127232	101471952	50506600	151417520	73299968	139772672
		threonine	1284	LC/MS Pos Early	564	1514	120.066	72-19-5	6288	C00188	HMDB00167	116438568	163748064	78296800	90329432	58879020	23154560	116821880	80074352	28950116	194789936	117926592	58672884	133625344	171524800	31658028	74660432	53574384	299530912	9995288	82123712	114327728	129116408	75564480	96512656	66603840	38596512	107184624	34467648	35155000	92732808	74465408	62302436	197031424	90654000	37968012	138147536	57099776	176700608
	Guanidino and Acetamido Metabolism	1-methylguanidine	48114	LC/MS Pos Early	100000715	2149	74.0713	22661-87-6	10111	C02294	HMDB01522	13621364	16255434	27218824	36313444	21721704	11667329	31266426	59943432	12713482	36146420	26945208	21027668	14599328	44885792	16642911	30195058	17080432	26149530	6144907	14441137	15830095	14111219	28392748	26755868	29577268	9011473	28750124	41071104	20072242	19299820	24506160	13275257	35443480	17198776	23660816	49833784	17113988	16715045
		4-guanidinobutanoate	15681	LC/MS Pos Early	100000096	2320	146.092	463-003;463-00-3	500	C01035	HMDB03464	237934016	221828112	70899176	310831360	174381808	147385472	494224768	308345632	171385872	355316384	589470592	199828608	163349760	348186848	227422592	590950528	206971168	634917632	269474976	542003136	250424240	277025440	187368064	598414912	288118016	272475520	328639264	233257504	225526736	230120576	492390592	166222224	304685248	281904352	197194976	340945568	266692016	681766784
		guanidinosuccinate	32446	LC/MS Polar	100001212	3550	174.052	6133-30-8	97856	C03139	HMDB03157	5986584	7361194	13462361	8846424	4512681	2.6442e+06	4.62049e+06	7.67249e+06	3.33953e+06	19290440	9094065	11160544	5805513	8.20997e+06	2.31039e+06	7657219	5012977	9197749	13870124	8.3829e+06	4.47574e+06	6870003	16867454	7.15414e+06	8311074	3456348	5.14434e+06	7552031	4.11726e+06	8260032	7326564	7646271	7771384	4.63805e+06	4.01249e+06	9715191	4761652	5668290
	Histidine Metabolism	1-methylhistamine	43831	LC/MS Pos Early	100001204	3040	126.103	501-75-7	3614	C05127	HMDB00898	5755555	12089284	21706704	21700070	12021962	7.43801e+06	13375041	9304008	4.08727e+06	20710922	35722776	13573809	14295550	28054136	6291070	12770355	19703352	39220140	9690841	27383810	5305735	11704148	16540251	18320800	12929705	8435906	11658310	7006671	4973421	8777437	21269164	6329359	24962778	11106895	9565312	23117756	20532508	26076452
		1-methylhistidine	30460	LC/MS Neg	100001051	1227	168.078	332-80-9	92105	C01152	HMDB00001	7.2708e+06	6991799	22655968	24219984	10345521	2608721	7681249	14992456	2.6295e+06	21306356	23457876	7.44316e+06	7158612	15351590	2880498	10005070	9534434	26869234	18196446	16782720	8195569	10008500	25965628	15993470	9534488	4152206	8028371	7083986	3092320	6637144	13643925	4150057	15973354	10011631	4126597	17646792	9308297	14227834
		1-methylimidazoleacetate	32350	LC/MS Pos Early	100001208	2064	141.066	2625-49-2	75810	C05828	HMDB02820	71844288	73666872	34229564	69360592	73496432	41985500	43074472	53762748	68632144	77034736	132004728	91661600	72448120	118273472	57605720	40848044	50906208	63661948	48996032	65284764	60761300	63157064	38405752	64242748	81378440	34875700	26219736	49752900	51198688	61277312	116161152	68902224	112155856	71935440	60552540	55771296	53030016	58030528
		3-methylhistidine	15677	LC/MS Neg	100000042	906.3	168.078	368-16-1	64969	C01152	HMDB00479	317206208	6335271	531788544	379151776	233333488	9370427	139372432	95619208	79442152	27017850	497484992	338415456	330021280	160608656	28130800	25049748	9951665	811054272	116410672	55011360	193950416	168783984	219590208	145840288	31744530	14966679	131026880	11146453	85965144	8064608	307837184	62859024	185196464	251008288	6817155	61305584	16275878	318347200
		4-imidazoleacetate	32349	LC/MS Pos Early	100001207	2055	127.05	645-65-8	96215	C02835	HMDB02024	8667991	10134460	5683377	11509215	8.05818e+06	4758579	6658186	5110214	4549871	6585636	12425815	3.93092e+06	7177149	9928849	8034779	14143984	5357027	12571813	7338000	7.83514e+06	9526769	14479041	8632662	17991128	10204703	7370170	6491284	4423054	5647593	6780152	11648533	4410377	10019017	7.84383e+06	9788192	13961767	4574878	8887751
		cis-urocanate	40410	LC/MS Pos Early	100003425	2406	139.05	7699-35-6	1549103	-	-	10340946	15301635	32810998	7519876	17400736	5067325	16009126	93956504	69006784	29970908	6498277	8365309	12699338	28362166	31117872	70692264	4388375	24067742	18028294	8.22625e+06	6896165	12467500	41874136	11527442	9308487	5266840	28752896	80280040	51754456	16472930	10579417	6371244	9903277	12735282	37694060	45436996	5851622	58408640
		histamine	1574	LC/MS Pos Early	354	3035	112.087	51-45-6	774	C00388	HMDB00870	ND	129609	284338	328185	170662	ND	479572	97872	ND	686542	724018	227878	227856	413106	ND	143676	234435	881858	374754	270479	ND	201443	417926	295093	210456	ND	404936	59390	ND	470383	365647	70683	338603	227131	ND	296647	218256	557685
		histidine	59	LC/MS Pos Early	355	2707	156.077	5934-29-2	6274	C00135	HMDB00177	506992096	690406720	475702528	553840768	795339904	149580048	1356913792	396293792	117878136	1174629376	1004352384	460663488	784195968	278099200	139972976	1003331392	289797888	2660775680	721075264	658568192	409593376	659457280	609048256	869409088	1040181248	288072736	962514112	242255584	167123136	584990848	663514432	375463520	458511232	519807424	173438304	1801909632	311030656	1527806592
		hydantoin-5-propionic acid	40473	LC/MS Neg	100002514	767	171.041	5624-26-0	782	C05565	HMDB01212	24972056	12617896	7714192	45235248	21685974	3677901	10981191	23657914	4811555	25685012	29123140	15194387	6650916	32577864	22088858	63398508	16223715	12698799	20608900	20252848	34155656	17776204	13763418	37159128	12115840	7502367	11800178	15931079	9427028	20184766	15672095	13794881	16757089	10736217	18018856	45591716	16915516	3609412
		imidazole lactate	15716	LC/MS Pos Early	100000263	2040	157.061	14403-45-3	440129	C05568	HMDB02320	55861020	81959184	83366336	106580552	46239648	55368872	70545000	49136564	33078508	154739968	117275296	53666800	82062928	140834416	113705272	173530624	99633744	176756832	86429352	71294344	62108712	80378480	97758520	116578008	81393472	55825680	66611720	52747032	40060040	103860000	80355192	45677032	150110576	47729948	165617888	189689616	102987120	103635528
		imidazole propionate	40730	LC/MS Pos Early	100003434	2263	141.066	1074-59-5	70630	-	HMDB02271	39526240	32457624	27553242	50318260	60478652	126000528	33835868	23186622	12976655	77485984	37055956	20791512	34630056	15833387	23260020	109771280	55198976	270212992	79897744	24712582	50182688	38794488	39508496	43440980	42812548	97003472	25208564	22093700	16298590	80854344	29425702	19813564	11910029	40879332	38717848	109424536	68922088	163886640
		N-acetyl-1-methylhistidine*	43255	LC/MS Pos Early	100004299	2100	212.103	-	-	-	-	64675776	32968240	102786136	155493216	77153288	5705500	21490160	55068756	64079520	89209440	80632608	68493504	27889584	90784344	61671664	18820606	59075776	67414072	64711140	148097648	48577952	37228396	113146208	97926208	63345872	6534813	7278880	45173192	49499272	54977216	60319252	36290248	70425840	52180960	76909440	31320544	72782728	44464464
		N-acetyl-3-methylhistidine*	43256	LC/MS Neg	100002204	1360	210.088	37841-04-6	193270	-	-	7222034	237267	40326048	19065868	9462962	126573	2196738	2261259	3448431	928032	11681790	6657086	4839554	3643200	925255	567273	376477	12743442	4041100	3866692	4052130	3683130	11971581	7046992	1004901	257867	2060030	465128	3739190	375103	6312041	1215040	3266661	3933393	268267	1410004	574464	6428803
		N-acetylhistamine	48679	LC/MS Pos Early	100006123	2287	154.097	673-49-4	69602	C05135	HMDB13253	3226987	4538361	14451786	3988053	18566964	4358882	5176877	3044420	2497272	7061804	18174668	4554939	15051642	193322160	9002018	3598747	5338500	22132360	9605662	4591517	6457252	11646296	12265828	6596037	11397442	3872858	4127885	2337519	943756	10398649	21235172	3613401	271594048	12963780	13865857	4639808	9373680	21393218
		N-acetylhistidine	33946	LC/MS Neg	100001293	900	196.073	39145-52-3	75619	C02997	HMDB32055	13521605	5845534	20963134	17383546	13138987	1393617	9756953	5515372	3442647	10207238	15785935	12013187	11119938	8760070	4.08399e+06	6353410	3551198	39250824	13596885	11237707	12445408	12506083	17421500	19339686	11000935	1478427	9118493	3557998	2781695	4900210	10273487	4383992	13108127	7748503	3625928	9900478	5656940	17667092
		trans-urocanate	607	LC/MS Pos Early	537	2285	139.05	104-98-3	736715	C00785	HMDB00301	101792376	71355824	118890248	60565084	34503368	45712408	68207376	83832384	69617016	125538808	117962256	78120536	47625160	74256512	91503944	62814468	75919528	76604328	69926432	41307940	106863064	61705100	104963080	61677456	47507816	57628176	47210664	76390288	66749180	108240744	101030104	59713632	74116752	56291324	121072272	83459184	77038344	56730720
	Leucine, Isoleucine and Valine Metabolism	2,3-dihydroxy-2-methylbutyrate	57547	LC/MS Polar	100010869	1318	133.051	14868-24-7	301941	-	HMDB29576	47123356	18525350	81219688	147352928	106524392	29800206	63699444	47728188	25863146	371194016	292069632	168170272	24675102	76871720	26241708	53106448	12765295	56672700	40891036	63232376	87692464	19843910	116451248	71953808	191849216	25923006	22917514	253283968	68019240	46813460	326276832	13598549	77967288	31081894	18433034	78073240	35492152	141387200
		2-hydroxy-3-methylvalerate	36746	LC/MS Neg	100001541	1800	131.071	488-15-3	164623	-	HMDB00317	194010	ND	344446	266254	ND	ND	158958	627466	299788	ND	ND	ND	129279	401105	ND	162787	ND	376410	816203	523154	221619	ND	ND	320771	479728	ND	ND	359235	386821	ND	ND	ND	397728	ND	389590	378748	226782	498865
		2-methylbutyrylcarnitine (C5)	45095	LC/MS Pos Early	100001509	3035	246.17	31023-25-3	6426901	-	HMDB00378	30361548	20145900	9998942	68657880	28670894	3704520	46839116	74827680	5835064	13850554	72320576	36394660	17739498	59974164	26317448	60791572	33646368	71942296	84952816	42825536	16904138	20939642	14670622	53468952	49036516	6978900	70987840	41781492	5363610	27910932	26164914	36194912	57566232	40420076	21697404	81104712	27414878	20679946
		2-methylbutyrylglycine	31928	LC/MS Neg	100001155	1884	158.082	52320-67-9	193872	-	HMDB00339	3474059	4624833	16958914	11171133	4305308	1767964	4466240	8013245	5432623	12061187	13210350	11559655	4395185	32108912	3947522	6930825	8.29497e+06	25883840	20811664	6223696	4822277	6212001	36704160	10097737	4334280	2369202	6889308	4045421	10839792	11140743	5881972	6235596	42381416	3811699	1946536	8997972	8483157	11455793
		3-hydroxy-2-ethylpropionate	32397	LC/MS Polar	100001170	1443.3	117.056	4374-62-3	188979	-	HMDB00396	5.07754e+06	12861913	12775327	10697503	12680482	5590621	10696420	18525070	3.26679e+06	12560059	19083704	9003798	8936819	9201572	2242400	13701423	9584173	16661634	9221738	8.07385e+06	4.70199e+06	8.02389e+06	5140062	13798334	14409384	6.87098e+06	9888280	14908653	4557117	4.55057e+06	11271652	6.27813e+06	17829976	6.58419e+06	3.85896e+06	31339308	14828768	9203220
		3-hydroxyisobutyrate	1549	LC/MS Polar	111	1619	103.04	2068-83-9	87	C06001	HMDB00336	8.28692e+06	17746918	19582346	32787918	11616370	3.60686e+06	21858624	31863730	2225356	25287048	35146608	11270148	17552290	29247720	5181606	17942640	16642753	54524716	17322412	19057194	7.01565e+06	18200926	15977409	36358344	18703092	5437379	16737964	20182880	4.211e+06	7637201	23280490	7453091	25325080	25641988	8963299	39837632	22081854	35606428
		3-methyl-2-oxovalerate	15676	LC/MS Neg	100000036	2064.2	129.056	1460-34-0;51829-07-3	47	C00671	HMDB03736	947253	3235332	3895836	8600991	2470388	205941	ND	ND	479055	ND	4560440	1782959	3.28982e+06	6372104	ND	1722736	1503955	17179064	469933	ND	557123	2301135	ND	3445383	ND	ND	441205	ND	ND	ND	ND	ND	ND	2665496	ND	5409288	1241417	8213736
		3-methylcrotonylglycine	31940	LC/MS Pos Early	100001149	1980	158.081	33008-07-0	169485	-	HMDB00459	1938090	2294528	4925798	4239653	2728486	1262252	2179273	2642911	4572945	6954442	5262857	4427450	3791361	10059446	3360598	3038609	2645092	9913028	12040039	2934868	2385066	3846852	19443012	3940373	1940747	2250847	2012281	2.04763e+06	8.35976e+06	13094292	2810756	4412729	10830539	3.89409e+06	1161644	2557823	3235688	5182084
		3-methylglutaconate	38667	LC/MS Polar	100002458	2579.6	143.035	5746-90-7	1551553	-	HMDB00522	23961806	20176114	86247384	20846114	11836199	9627270	22792818	31038138	6227467	12474747	17382314	23506350	12126918	51187856	8615211	17410058	15097685	25629780	17539982	36496008	19714262	19544746	63187772	19402638	13905527	10893621	24925276	28506844	11420883	16714987	13707876	14184192	35461156	11571009	10049123	20784328	15296365	18992420
		3-methylglutarylcarnitine (1)	46547	LC/MS Pos Early	100005849	2635	290.16	-	128145	-	HMDB00552	2.81069e+06	2134884	1773696	2499789	2234259	748576	8426032	4655805	996014	3097075	7030101	6121816	2444156	13370914	1204832	1815965	2.58086e+06	4167428	2237335	3964843	2260440	2864502	3432928	1.73148e+06	2978746	1.02065e+06	10437490	3515639	1143239	1756135	3940689	2387930	6.84854e+06	1059546	2783793	3066937	ND	2030008
		3-methylglutarylcarnitine (2)	46548	LC/MS Pos Early	100005850	2675	290.16	-	128145	-	HMDB00552	105769096	56799568	132423832	62163260	52462332	17987804	224290336	120174584	21836638	51736880	126552584	152674112	60423592	354101888	38653804	37393916	75946968	71338616	49731656	99095184	83192888	67984448	114321240	50229572	77519912	22135778	223897440	89774976	25168668	35426368	82783888	70874840	216052480	32714024	69108448	76530496	44567960	31262130
		4-methyl-2-oxopentanoate	22116	LC/MS Neg	100000551	2170	129.056	816-66-0	70	C00233	HMDB00695	787021	901860	1.74523e+06	1203906	ND	ND	ND	ND	ND	2013957	1252592	672143	ND	860226	ND	ND	ND	2932277	1131051	ND	ND	ND	825460	603198	666982	285372	ND	ND	ND	ND	ND	ND	ND	ND	ND	1037752	ND	2274589
		allo-isoleucine	46552	LC/MS Pos Early	100005840	2775	132.102	-	6950182;99288	-	-	1.76966e+06	8.24673e+06	1946971	11096750	2299204	1.67906e+06	2.85383e+06	30605258	1.11271e+06	2.75626e+06	2990753	2279939	2486430	2.38935e+06	1133627	1.6835e+06	1.69511e+06	8539607	3627456	1.99451e+06	1725495	3230119	3.16544e+06	1.45376e+06	3.86162e+06	1.81219e+06	1.94918e+06	1530495	2.0166e+06	2.25824e+06	1.96916e+06	1.94435e+06	3210100	2.02373e+06	1.52086e+06	3.01389e+06	1.73224e+06	8511404
		alpha-hydroxyisocaproate	22132	LC/MS Neg	100000706	1840	131.071	10303-64-7	83697	C03264	HMDB00746	ND	ND	ND	262163	ND	ND	150335	265858	234118	ND	ND	ND	ND	515787	ND	139691	ND	ND	615310	486041	ND	ND	ND	266180	231265	ND	ND	274421	183830	ND	ND	ND	187765	ND	143943	339540	122732	511486
		alpha-hydroxyisovalerate	33937	LC/MS Neg	100001300	1126	117.056	600-37-3	99823	-	HMDB00407	ND	723726	2421142	ND	ND	ND	1127688	ND	ND	1541920	ND	226286	ND	489960	ND	987712	ND	613446	ND	ND	ND	ND	2742036	1557238	ND	ND	ND	947787	368594	ND	ND	ND	ND	516544	ND	5501178	887162	3221347
		beta-hydroxyisovalerate	12129	LC/MS Neg	1442	1027	117.056	625-08-1	69362	-	HMDB00754	19494748	17795960	28162782	56556084	12617995	4713311	20124776	44889440	4292937	32602012	52967208	16332141	20717024	20556232	5670764	23429446	17841340	73514816	50075292	15040045	17221332	21168028	25760666	48781072	19488112	12555288	22539628	31618170	8498691	11049487	25659856	14845076	37609440	15824656	13559958	50349784	24767834	33354774
		beta-hydroxyisovaleroylcarnitine	35433	LC/MS Pos Early	100001594	2584	262.165	99159-87-2	-	-	-	55238156	54830956	79707752	94004312	56564832	39266192	75926784	110597984	35924880	92901000	104917680	64806256	66857624	49520744	50052008	88868256	70134920	148192832	153691040	100723888	52938576	55396164	85326936	105137064	109143264	47856204	88623168	96478480	37921228	86888288	71821792	49671484	41223896	70017848	60757472	131822688	70899232	68732552
		ethylmalonate	15765	LC/MS Polar	2054	2785	131.035	601-75-2	11756	-	HMDB00622	184158528	171329920	284294816	268701184	144565120	55488644	140124000	211380528	56017376	363380192	290067360	421372064	88637512	259963088	84969432	178335632	160425312	245643888	181921440	130879016	130743264	185695648	233320960	267581008	231222176	66649568	145238512	157052608	72357096	179467408	183493296	313110368	202039008	101301560	160779696	231267248	190895600	181824768
		isobutyrylcarnitine (C4)	33441	LC/MS Pos Early	100001055	2810	232.154	25518-49-4	168379	-	HMDB00736	408108800	146835872	180316720	391194080	130276664	68918960	239462944	285989504	114894400	190892576	354215520	300969920	330041344	503271488	169237456	183328720	208726032	457030528	636533056	374504736	291547392	268713216	511165536	306144992	220582176	169909248	397481440	283571744	140541408	304975968	181004352	304645536	474725536	519950752	156990368	209140800	206425072	202898112
		isobutyrylglycine	35437	LC/MS Neg	100001590	1420	144.067	15926-18-8	10855600	-	HMDB00730	4594622	5787368	27188180	11385941	3502623	1939325	5112034	7955366	10291428	21180624	10661649	13911108	11121687	58332516	4416077	5526493	7.12368e+06	29535560	18263546	6769113	5615818	12794902	61697480	11407583	4451954	4764064	10068596	5.109e+06	30514212	20870218	5385923	10029041	61475888	9576988	2452943	6796432	5923738	15412181
		isoleucine	1125	LC/MS Pos Early	376	2800	132.102	73-32-5	6306	C00407	HMDB00172	37516128	49324812	43654420	42127468	32502526	19106034	43034100	27319098	12612760	76763392	62030156	33443922	50419756	51902632	21895760	41131940	31525260	69197216	4352506	36941624	30394780	43968088	37693524	38257504	31628088	24524192	38087480	15772489	15459825	50576408	46644044	30214820	55302816	35556936	23133782	56300016	35540132	45021636
		isovalerylcarnitine (C5)	34407	LC/MS Pos Early	100001393	3085	246.17	31023-24-2	6426851	-	HMDB00688	3945057	2463071	1707809	10560418	7512108	1212706	48156496	23844634	446662	1914016	10632278	7.75978e+06	1.60174e+06	9566755	6208809	13809277	6000336	13975619	19172202	8594764	1.60342e+06	2211838	2795672	15976587	15455291	1.81177e+06	105729480	11811017	926044	4191843	2.32037e+06	14610524	11317723	8358689	4394698	39845448	3.8634e+06	2657199
		isovalerylglutamine	54913	LC/MS Neg	100010859	1956	229.119	-	-	-	-	4243728	5268069	15237186	8506579	7595868	2351331	3972093	4752534	4617508	4227704	9991747	6023412	5.90501e+06	7387484	3092086	3789064	3533979	14507049	4800737	4280219	6.30025e+06	5014158	11959692	8501503	2853795	4319441	6403125	4017236	10829262	7.34312e+06	5.78153e+06	4690704	5146366	11567025	1592296	2894852	4656210	11953211
		isovalerylglycine	35107	LC/MS Neg	100001452	1950	158.082	16284-60-9	546304	-	HMDB00678	11890651	19604660	86317840	32358384	22716268	9332806	31436316	25262208	34576488	65643324	54445412	55359424	28236828	113689016	20236730	16108831	23121242	151253312	63413716	21593484	16952180	33112332	215196912	33339304	13742785	15742819	40140904	15005117	110108848	85163968	22718958	28552078	124973720	37111240	7334716	17561070	25492152	97911120
		leucine	60	LC/MS Pos Early	397	2864	132.102	61-90-5	6106	C00123	HMDB00687	61214216	66569068	82805824	69416560	50311876	22073530	70949024	67058820	17012920	106877568	112850080	44295184	74107408	74273632	23993604	65299104	37174448	160484944	2778679	54840140	49562624	74443000	73463184	66078152	56306424	35513560	66252324	31339414	23710388	67926280	72057744	33717316	70699344	60371744	29538000	102502432	43452740	79069368
		methylsuccinate	15745	LC/MS Polar	2051	2800	131.035	498-21-5	10349	-	HMDB01844	70955312	100241664	84854640	33475240	36199596	18790250	35411640	58541128	24487426	106740832	71951688	84355040	39596356	59751828	22923076	26144582	43255880	70013104	64543488	51677704	52879504	62572488	89066064	27820640	64727456	17963232	47054240	40814708	27451476	50626312	42273728	50030740	64941628	35142428	36998792	50626312	34769832	129637856
		methylsuccinoylcarnitine (1)	53031	LC/MS Pos Early	100009275	2589	276.144	-	-	-	-	16516739	17403550	19857208	16656269	14969512	4601471	22171964	22650626	9244281	18289986	22453592	25889224	12392226	12647067	13925122	8655675	10723555	23860470	16730936	14470109	10487023	18772302	18258222	16157297	33968908	5983514	19842654	15595344	9071037	10377172	18611740	14568153	16634478	6525389	28622442	17104888	8.20658e+06	19935060
		N-acetylisoleucine	33967	LC/MS Neg	100001276	2325	172.098	3077-46-1	2802421	-	-	13691077	9743906	11177501	14349888	12807531	1853467	9978509	8177966	2531378	19063962	23081932	9111471	13469726	13576585	5816185	8322465	9886385	36117592	12869194	7.32514e+06	16767794	7.44562e+06	14385974	14384633	9823330	2384479	8.37868e+06	4734912	3958562	10149412	12187738	6443914	16116759	14736313	6427873	11356517	9534300	23802654
		N-acetylleucine	1587	LC/MS Neg	1082	2400	172.098	1188-21-2	70912	C02710	HMDB11756	2942882	2615197	2572540	5297352	4458112	355635	2239830	1132156	866388	6806535	3671030	1825529	3301256	1902157	1.50014e+06	1.01802e+06	1769361	7729281	2567401	2332787	3536987	2094466	2.91028e+06	6523867	2307069	562422	1390698	583197	984120	3855346	1769098	1.85691e+06	2882596	3664457	1507633	2.01152e+06	1553092	4511050
		N-acetylvaline	1591	LC/MS Neg	1084	1704	158.082	96-81-1	66789	-	HMDB11757	12629270	12755553	17751362	14854958	10782695	2.07219e+06	12036133	10091060	3119445	20753730	23668056	12707085	14436980	16548718	5086535	7.7871e+06	10118858	39853060	17824356	8.01318e+06	16665960	12141720	15572541	16166964	10388335	2925547	10128140	7683130	4601918	11074895	12679872	6.99754e+06	17383444	15618559	7.27359e+06	12405727	10866633	24846208
		N-methylleucine	35666	LC/MS Pos Early	100001581	2787	146.118	66866-69-1	2777993	-	-	1106754	307893	6.01464e+06	ND	783128	ND	1074640	781138	ND	1372924	62273304	660550	1356964	28051776	24656692	36381004	623429	5938370	990735	676422	1147827	5191987	1137601	ND	473386	474619	824089	787386	ND	ND	10622604	20656396	4177098	12235743	23164290	9131483	14930432	6427591
		tigloylglycine	1598	LC/MS Pos Early	1161	1926	158.081	35842-45-6	6441567	-	HMDB00959	15228018	18317352	12416372	10861925	18147616	12049097	27778930	19568396	26874944	76128952	47346604	26801006	17839072	109557936	22520732	27267546	26494058	78456088	34922292	25682202	22584788	17855200	27952900	14318903	9926157	12928586	27792528	11813747	60607644	85138224	29135854	42038080	78223552	26813034	8522390	25039200	25446958	60455232
		tiglylcarnitine (C5:1-DC)	35428	LC/MS Pos Early	100001597	2962	244.154	64191-86-2	22833596	-	HMDB02366	39558028	35376520	62102596	64680956	29915280	20612160	53092472	84464328	13344650	75297824	129771872	28894076	24953848	23761678	31245882	56111500	49006812	105369216	60391052	62579524	43683160	32774856	57465312	50319568	46733752	33259124	57069608	59587060	20121796	39671740	61193224	19395020	20970284	32219594	37137520	75605424	39231940	64579440
	Leucine, Isoleucine and Valine Metabolism	valine	1649	LC/MS Pos Early	566	2479	118.086	72-18-4	6287	C00183	HMDB00883	42103616	50730740	84781040	60306804	36992560	17201660	44634984	35471656	11052358	122490128	94801480	38062440	55038548	57236096	13764066	47105176	27945586	119862064	ND	29618420	33858640	57130088	48824576	47269368	46533088	26925614	45061672	36397728	20673148	49833608	62009184	20386216	59625880	47899368	20239704	71675504	30372254	58959860
	Lysine Metabolism	2-aminoadipate	6146	LC/MS Polar	381	3500	160.062	542-32-5;1118-90-7	469	C00956	HMDB00510	4518737	2.0927e+06	3.56223e+06	8785767	6132518	1.13555e+06	5224922	7523987	1.12271e+06	3778016	10223752	4.30901e+06	5158089	3560433	2.65654e+06	12106673	3.45901e+06	8118945	4.64093e+06	4.48333e+06	6.73782e+06	3286124	4.90151e+06	8390796	6.00453e+06	2.86591e+06	5.11907e+06	3.57972e+06	1.87748e+06	2.66327e+06	5741974	4.66361e+06	3.52493e+06	6.62518e+06	2.42392e+06	10921105	3506673	2758386
		5-(galactosylhydroxy)-L-lysine	43582	LC/MS Pos Early	100002462	2755	325.161	32448-36-5	-	-	-	14315043	17207360	30152516	11320131	13755361	6469994	11210282	17546242	4873301	25366904	20219472	11977096	10684852	24079024	5494587	14878750	11694554	32107240	13586426	16581649	11437547	17440498	22420500	10567060	21321964	7.53055e+06	11147126	11510546	5542354	11597233	15259460	6131244	19921016	7233089	8797468	24445952	8795768	21762440
		5-aminovalerate	18319	LC/MS Pos Early	100000454	2220	118.086	660-88-8	138	C00431	HMDB03355	34019668	21558974	ND	13771451	26814432	16482385	20120914	14115281	8535917	27290734	10494436	20992300	9746058	7477289	2817446	19537864	6262287	24756190	21057144	21364264	26085612	27615216	ND	16438476	23137408	25137052	8597879	2636826	8993797	21883346	19610364	18141984	18551440	23952076	5458969	27433438	11009116	24577004
		5-hydroxylysine	15685	LC/MS Pos Early	100000054	2790	163.108	13204-98-3	1029	C16741	HMDB00450	3349218	5247175	1255594	3854726	10029187	994524	2252408	5245304	1032228	9470915	7112309	3339413	5616949	3623270	727119	4362598	3276268	21336656	3271119	5866444	4219126	4453100	4878854	3776937	7080302	2126833	2669790	1706207	1237369	5361430	5486704	1608629	6212005	4984400	890724	7819582	2388431	8.30966e+06
		6-oxopiperidine-2-carboxylate	43231	LC/MS Neg	100004499	964.5	142.051	34622-39-4	3014237	-	-	2612356	3.62233e+06	3025053	7760996	4016644	1064001	4978956	3.99304e+06	1594575	12351464	10463263	1534211	3505617	7.7631e+06	1.79698e+06	10891935	2426157	15675843	2564738	1737767	4351607	3658503	2794010	5551382	1875744	1876036	4.18706e+06	ND	1.40249e+06	5311242	3725408	2153337	5394016	6536412	ND	9823403	2782945	8323415
		glutarate (pentanedioate)	396	LC/MS Polar	339	2900	131.035	110-94-1	743	C00489	HMDB00661	3.875e+06	4409564	4673437	6519091	3.47976e+06	3.24096e+06	3.2282e+06	22559686	3.70794e+06	29916878	3890898	4.10445e+06	2.02957e+06	8963367	1617222	3.66543e+06	3.06191e+06	8651689	16254126	7503963	2.49642e+06	5.25172e+06	4.33737e+06	12988333	10539280	4777983	3.93156e+06	23772664	4805544	15541206	3.73189e+06	4569324	6.24736e+06	3.56984e+06	3.0551e+06	5055707	5.53539e+06	4.87753e+06
		glutarylcarnitine (C5-DC)	44664	LC/MS Pos Early	100001593	2393	276.144	102636-82-8	71464488	-	HMDB13130	61688360	71916344	54363804	109920496	61075240	47639692	79644960	67688336	54666716	97208016	101830312	50634424	56932644	54344164	61820272	80445504	68017992	79530240	73602728	94546720	56536420	74824408	48537460	100941240	73170216	55992044	82686376	63855776	62145324	89301448	111342352	49714416	51484840	43436532	89518440	89102592	75531648	63597360
		lysine	1301	LC/MS Pos Early	407	2850	147.113	56-87-1	5962	C00047	HMDB00182	56050100	68542840	52827136	55937572	99809208	17731592	88160360	65433680	17492512	130113400	123965744	49471784	154188192	64250648	23938518	51577816	42602960	1061176704	39733400	86528032	47488144	70982048	68460664	80933472	79965480	28006478	100045672	23800080	22292944	65566360	85033704	44701212	84900192	114281112	25604112	92333456	40513984	246573712
		N2,N6-diacetyllysine	48455	LC/MS Neg	100006124	1604	229.119	499-86-5	91827	-	-	2606169	2779261	7635065	6.86086e+06	4.01057e+06	552266	1.80835e+06	7727178	1517124	11540009	5185999	2939802	3270595	5651140	4680988	2.03726e+06	3035889	5274073	5291500	4487780	2852180	3005806	7608613	6.59915e+06	5416551	589509	1856553	3867433	1652194	6389121	3.49338e+06	1.67181e+06	4646134	2984263	3885129	2903828	2987659	4.00047e+06
		N2-acetyllysine	36751	LC/MS Polar	100001721	3372.6	187.109	1946-82-3	92907	C12989	HMDB00446	2.58394e+06	2978063	24340818	8.15059e+06	4400426	476994	2.20738e+06	3.49317e+06	2.60231e+06	8.0136e+06	5.66321e+06	2215202	3.72209e+06	4075263	3.22008e+06	2.34612e+06	2.5025e+06	10113471	5.78179e+06	8.31553e+06	2.68629e+06	3.83381e+06	15619862	7.1742e+06	7.25061e+06	594852	1.89801e+06	2.55991e+06	3.02598e+06	4.75118e+06	3768155	1.24703e+06	4.08097e+06	3.12617e+06	3.84997e+06	3.23498e+06	2.98505e+06	5571788
		N6,N6,N6-trimethyllysine	1498	LC/MS Pos Early	189	2825	189.16	23284-33-5	440120	C03793	HMDB01325	374888256	287191040	901628544	660114496	420992736	321991520	352418752	515398624	117126488	706103296	849681088	302480384	489258880	470094912	174596864	436376640	340785632	973314944	555480000	459080672	467078464	348746944	633071872	658693888	499432032	307143360	380625792	262598560	163033680	313740288	672385024	186251408	432226784	692746240	228602672	566188544	424143936	579225984
		N6-acetyllysine	36752	LC/MS Polar	100001734	2612.6	187.109	692-04-6	92832	C02727	HMDB00206	4314156	5424560	3.81539e+06	5688573	4.75423e+06	1632737	4.73403e+06	9139356	1.45576e+06	11628144	11799852	3.57171e+06	6.56108e+06	7424147	2.89646e+06	3790540	4018266	14884724	5804152	4.76723e+06	3650340	6174784	4591651	4690942	7591880	2234918	4544145	4619133	1.69416e+06	4.8707e+06	6.83043e+06	3.36687e+06	6131973	5.03532e+06	2.28945e+06	6389777	3539757	7.37535e+06
		N6-carboxyethyllysine	37458	LC/MS Polar	100001769	4124	217.119	5746-03-02	-	-	-	879503	660189	272308	606431	623675	ND	1.41011e+06	679082	462009	1.07634e+06	1.23719e+06	662468	776265	1.1055e+06	424631	750376	854158	1.30028e+06	847947	628690	1.76859e+06	881122	ND	838929	1.12523e+06	ND	707727	696266	888273	708610	647678	388567	ND	650335	400989	1.24233e+06	1.30189e+06	1.16774e+06
		N-acetyl-cadaverine	43530	LC/MS Pos Early	100002249	2385	145.134	32343-73-0	-	-	-	22837236	8586087	5677658	2808045	5655508	8271996	4290424	1580032	3724137	27864384	4537091	4276469	5667760	115251928	5095966	6076134	3642588	37365552	16816966	2937155	7295774	7113348	3157655	6937176	1423870	23378680	6321086	2595224	5805763	32228756	5215137	10570501	185165792	7444637	6836443	8.0999e+06	3018156	37492716
		pipecolate	1444	LC/MS Pos Early	1025	2200	130.086	4043-87-2	849	C00408	HMDB00070	1802532	3917322	2506253	2382608	3716252	971170	1645913	2652188	985602	2203408	26772412	3085857	4382695	24198976	17914418	9404113	2220482	6406704	3.14311e+06	1581916	1759720	10575533	2201356	2740826	5079397	1314386	1760755	1402546	1.1196e+06	854305	4494669	8666726	17246304	6337893	12618184	7702523	6878923	2313363
		saccharopine	1495	LC/MS Pos Early	392	2530	277.139	997-68-2	160556	C00449	HMDB00279	3179137	2410783	5318044	5840602	3441383	2529139	3438972	7082216	1113503	5541750	5860854	2365205	2455196	6359839	1456421	4916804	5144355	4283145	6451808	3.86326e+06	2947477	2165503	4258475	4709729	6479098	2865806	3339150	4735462	1395683	2505352	4666592	1227226	6386291	1504645	2357804	7.75255e+06	5407783	3530712
	Methionine, Cysteine, SAM and Taurine Metabolism	2-hydroxybutyrate/2-hydroxyisobutyrate	52281	LC/MS Polar	100008928	1258	103.04	-	-	-	-	15236177	12741484	11356369	32961150	12573468	6.43064e+06	13002121	17685364	3.12267e+06	23034252	28716260	15869189	9769659	27582616	4.49901e+06	12615834	10077913	28839960	19386120	21974676	7909658	9639715	8694621	24086168	31945410	7204613	12405692	22712764	5046112	9023338	19036330	8262918	33034302	5551040	10782113	29630222	16456398	24166424
		cystathionine	15705	LC/MS Pos Early	310	2270	223.075	535-34-2	439258	C02291	HMDB00099	32226030	32991822	10351586	5819236	14767864	1803532	9393511	36469420	4211636	40307760	8923863	5524267	9154244	6646705	2813738	4272996	33836712	30849040	3.78869e+06	12442090	88797456	17373834	20568192	9931158	21855150	6742697	13987607	10131037	5628331	28047166	8462194	18982988	16142114	13329104	5934373	6628102	40892280	14271654
		cysteine	1868	LC/MS Pos Early	800	1488	122.027	52-90-4;56-89-3	5862	C00097	HMDB00574	3000403	3939363	5666256	7560925	2379976	2297446	3572873	1525109	965896	7750473	5389309	4.0729e+06	7166451	5863672	2227493	5225909	6053599	11956141	8945101	3438061	3365658	3858420	5900238	8.29161e+06	2361664	2553755	3770698	2781885	1282986	5695487	3520321	2909606	6359116	3390657	2769656	8.20491e+06	9051221	10690746
		cysteine s-sulfate	22176	LC/MS Polar	100000808	2273	199.969	1637-71-4	115015	C05824	HMDB00731	910823	1.3139e+06	425455	736753	433885	504081	1.18963e+06	1.30424e+06	742459	960978	568488	920155	232460	307512	530368	1.14367e+06	846353	1.43939e+06	2386482	4566942	821105	623136	1.41476e+06	1.18891e+06	662218	813818	1.19044e+06	653322	1.23018e+06	607262	552785	2231734	1.26345e+06	169304	901389	514183	1.8997e+06	1.254e+06
		cystine	56	LC/MS Pos Early	279	2000	241.031	56-89-3	67678	C00491	HMDB00192	31279894	32801930	52462888	14482968	39208384	22493724	34593392	53379620	14480644	45539496	47448888	30565382	26325836	39619116	13559735	33247566	30847760	94935184	12310722	58666036	31429916	29578270	45158092	17603480	46930264	23256290	32894778	38444136	18485934	31029652	31513356	18157328	38475388	19320134	20387616	49917360	23954176	48707624
		hypotaurine	590	LC/MS Pos Early	358	724	110.027	300-84-5	107812	C00519	HMDB00965	704656	991165	329120	659615	97889	ND	ND	ND	ND	468647	693183	541692	1308793	137576	ND	217416	ND	1512271	ND	ND	2.06686e+06	1209523	ND	737102	ND	ND	ND	ND	ND	361836	473176	138048	ND	547813	ND	548110	ND	932324
		methionine	1302	LC/MS Pos Early	415	2526	150.058	63-68-3	6137	C00073	HMDB00696	18586240	23476964	24980456	17568100	12646514	5312045	9577044	3955814	5987703	35145636	31567518	16220106	32092202	23949170	18869704	16419185	15347714	53763632	5278051	11074757	20349848	26158792	23852780	19077808	12585465	7122991	9229247	5861401	6283057	28314174	19568832	11988153	9328398	19791208	7411735	25484376	14666930	30127988
		methionine sulfone	44878	LC/MS Pos Early	100004635	1250	182.048	820-10-0	69961	-	-	5377085	7437393	6402177	3707711	4223481	2827998	8292052	2922780	873410	8773014	7116019	6476263	5477586	4340444	3203032	5082003	3679479	13155344	1600075	3918384	4815603	6031476	8.38109e+06	4231933	2392322	2967044	7798920	1777984	1187797	4071038	5785201	4716924	7.54303e+06	5241287	4080538	7998880	3.71538e+06	6183160
		methionine sulfoxide	18374	LC/MS Pos Early	100000039	1272	166.053	3226-65-1	158980	C02989	HMDB02005	13358262	12491271	10274601	8267530	11043104	6.90226e+06	17614652	14866396	4316160	13488315	10176235	6093190	7422414	7372984	6.81948e+06	9544221	5853385	9604417	835310	14199223	10350706	7.62658e+06	14401209	10343039	14738520	7668082	16168066	8635915	8086499	6583541	8123769	6113128	19069168	9530291	8038094	10592828	7846658	4573743
		N-acetylmethionine	1589	LC/MS Neg	1083	1787	190.054	65-82-7	448580	C02712	HMDB11745	152747	289146	402697	311678	ND	ND	ND	ND	ND	657805	320146	141073	386295	312553	105502	58622	120441	1241539	ND	74818	228215	324066	438909	344236	ND	ND	ND	ND	ND	356707	159570	65973	ND	209457	ND	203950	92347	747445
		N-acetylmethionine sulfoxide	45428	LC/MS Pos Early	100005463	880	208.064	108646-71-5	193368	-	-	1124649	1126409	2700693	1153664	1705363	151122	782082	902756	714344	2495233	1457427	815380	911383	1221332	1215955	548231	938854	2268627	836811	2034861	1338852	984029	3263144	1680649	2075393	ND	703868	632292	942538	1504752	794184	829093	1151398	1341802	1147122	626604	876231	1766445
		N-acetyltaurine	48187	LC/MS Neg	100005466	800	166.018	-	159864	-	-	26307658	31660664	30875430	31513574	17998532	15036987	14395277	31121730	12675129	120160136	93669728	26697572	24783826	63747600	11601944	12764324	17308234	157709824	21781892	27450270	24888776	30870322	27365172	23689016	20152732	12471252	14846987	21836994	13986213	26471210	59104580	14955631	61503108	16958516	20722368	22508262	24768246	134021584
		N-formylmethionine	2829	LC/MS Neg	194	1543.8	176.039	4289-98-9	439750	C03145	HMDB01015	963407	1550083	1575226	1043629	258609	ND	260923	ND	29992	2191415	2534295	4577900	2529032	1756845	386034	416941	663713	4790902	604724	315794	1346111	3372436	1686138	1237858	215419	126465	100322	171595	58350	1668885	1065668	2453640	489419	1374264	141709	1157200	575905	3632410
		N-methyltaurine	42989	LC/MS Polar	100004056	1576	138.023	107-68-6	6994586;7882	-	-	2057690	466111	11951795	1906877	2670045	ND	225927	7478906	667102	4524035	26414892	1061540	262495	915275	4275996	ND	ND	ND	8727521	1736408	3355492	17981384	8.23799e+06	4627393	27909640	ND	1413299	6352041	3.81149e+06	1937123	33462854	4223601	22960380	24562440	9090929	135952	3307383	ND
		S-adenosylhomocysteine (SAH)	42382	LC/MS Neg	197	1832.4	383.114	979-92-0	439155	C00021	HMDB00939	752242	703960	2492551	527213	745347	213943	453825	809703	116791	ND	1209399	497051	488953	1381034	346679	644242	629994	1456152	992765	ND	754138	693124	302704	645997	821528	91353	283317	591705	140195	138309	725164	306682	1267851	325457	321046	865109	587057	672833
		S-adenosylmethionine (SAM)	15915	LC/MS Pos Early	1263	3002	399.145	24346-00-7;86867-01-8;86867-0108	34755	C00019	HMDB01185	2776172	2194435	5438754	1732503	2.05962e+06	1371570	1818851	3479485	668787	2851691	2437808	1853902	1762466	2992830	1060814	3105523	1493985	4208484	271443	3351446	2181559	2760941	1715536	1719280	4186367	2073561	2168971	2470363	618898	1447703	2374162	815628	2920909	1327994	1469384	3773767	2169920	2710756
		S-methylcysteine	39592	LC/MS Pos Early	100002749	1955	119.016	1187-84-4	24417	-	HMDB02108	892764	2.06337e+06	1637367	164742	177571	ND	826081	129178	ND	1.69514e+06	7386594	904148	1061951	1903425	1227681	2.03198e+06	386441	2123727	1019518	1064472	1313390	2071149	650427	196538	840684	299887	540013	335610	ND	867267	2639408	2579016	1818140	1160100	1805974	2809429	1331868	2.53645e+06
		S-methylcysteine sulfoxide	43378	LC/MS Pos Early	100002927	900	152.038	6853-87-8	82142	-	-	19617808	84983128	21937232	19821684	15124051	6338945	30798958	12623004	6992659	52607328	101709376	13699997	22459124	22854818	10408492	28730900	9240314	63349824	9569232	37867656	29465920	79643072	26056420	19928436	43368888	13652130	32199292	17668994	6477257	35508520	67906400	28911284	38707308	30641044	23983652	99611888	22957668	46029088
		taurine	2125	LC/MS Neg	512	690	124.007	107-35-7	1123	C00245	HMDB00251	30798236	43649504	4403635	19935822	20487244	4680353	13368412	7183090	5162835	5891444	15174091	62651928	48859048	1773767	551081	13363783	1154592	54794260	12073488	55655020	93966312	38951836	7531029	21645674	4522232	2387158	11345407	1734922	7799089	3760010	17554818	10847969	1125072	33550364	710895	21905434	1129374	32996412
		taurocyamine	35117	LC/MS Pos Early	100001418	710	168.044	543-18-0	68340	C01959	HMDB03584	302110	ND	ND	8.08141e+06	372646	ND	345944	ND	1316362	ND	4531431	397165	1036279	ND	ND	269629	ND	646155	2968724	1454139	ND	734394	ND	10256984	ND	ND	339311	ND	1787339	ND	4196623	ND	ND	ND	ND	474074	ND	ND
	Phenylalanine and Tyrosine Metabolism	2-hydroxyphenylacetate	1432	LC/MS Polar	235	858.6	151.04	614-75-5	11970	C05852	HMDB00669	15836196	21267408	12766201	23578604	16858910	4664011	16857548	19367310	6750613	23424934	31528084	13496126	7.03659e+06	16611653	12651212	8030886	14102779	42232640	18673924	14870176	14273343	32133066	29501618	20159360	23689706	6416170	13227146	23306066	5754623	17833334	22425116	10550207	27467488	6.85609e+06	16988592	17430816	14079778	28285044
		3-(3-hydroxyphenyl)propionate	35635	LC/MS Neg	100001624	1980	165.056	621-54-5	91	C11457	HMDB00375	792162	3128126	ND	449974	1435971	5457030	4.14697e+06	3401922	3582055	801977	642232	622345	17433104	572425	51233428	347569	2515413	18797194	12170828	6980391	313139	13509754	3064745	290291	2583900	616029	6564335	2221287	2.07824e+06	515424	ND	1227589	2980712	26195398	108128608	165667	6377046	14266311
		3-(3-hydroxyphenyl)propionate sulfate	45415	LC/MS Neg	100005391	1294	245.013	86321-32-6	187488	-	-	4.07767e+06	11952349	52174988	25936076	11849900	34249368	11221132	15261773	19900704	58810796	15072669	5098234	13764881	21382042	41634864	1749780	7671286	73598256	59700700	20114472	2349684	40444300	52065300	19145218	15128225	3104786	16067583	18439386	10155091	27622360	13392490	11562839	13741611	15694977	78520856	2459717	12889500	45111036
		3-(4-hydroxyphenyl)lactate	32197	LC/MS Neg	240	1379	181.051	6482-98-0	9378	C03672	HMDB00755	24442008	10515722	28281092	13062541	11784389	5519490	11830774	11790404	5660793	36736832	31335704	8205390	10769112	20738548	12610811	19520384	11716355	26961200	23377974	9568914	67381632	9954697	45853684	17202056	5979070	9872221	9480540	13138597	8751303	16354953	14057504	5436182	20664884	7486860	8774327	18301540	11323554	15119441
		3,4-dihydroxyphenylacetate	18296	LC/MS Neg	100000449	1040	123.045	102-32-9	547	C01161	HMDB01336	10247912	1.83445e+06	2235127	1716816	1271166	614692	2620695	3100970	842277	15408838	4256531	2777937	1702632	2985674	1319693	2413615	1804993	3304958	ND	1427960	2862174	3027933	3589077	1590351	1.04509e+06	863263	1897434	1642044	782977	6432627	2692789	863660	1465312	1360064	1090413	2602784	1690433	2495211
		3,4-dihydroxyphenylacetate sulfate	48736	LC/MS Neg	100006254	800	246.992	38339-04-7	193283	-	-	49362844	6358240	5876048	4566631	12328378	3305429	5147899	13844804	5136912	49744660	23163632	12746575	3517929	20706776	15336211	6986717	5549264	6908893	5223827	21657544	18896068	9891186	12911188	3169658	11321332	2150724	3419132	12003718	5346916	26362296	16385318	3281134	8447339	3332816	6987359	7640778	7253984	9793805
		3-ethylphenol glucuronide	52936	LC/MS Neg	100009048	3133	297.098	-	-	-	-	ND	ND	ND	ND	ND	ND	ND	ND	ND	ND	ND	ND	ND	ND	ND	ND	ND	ND	ND	ND	ND	ND	1075132	ND	ND	ND	ND	ND	ND	ND	ND	ND	ND	ND	ND	524555	ND	ND
		3-hydroxyphenylacetate	1413	LC/MS Neg	114	1576.8	151.04	621-37-4	12122	C05593	HMDB00440	4142411	6308252	12263441	53114232	3004046	922718	8447348	5870435	1770009	4130715	16093522	2232634	2015697	9804851	8.2606e+06	1325006	1670163	4313109	6754310	1898286	2521836	7.99958e+06	15674621	25331188	7033122	339497	5398656	6714338	4599745	3116187	7529280	1939472	7352760	3453160	6002970	922269	1921609	5535473
		3-hydroxyphenylacetate sulfate	52921	LC/MS Neg	100006634	969	230.997	-	-	-	-	2492520	4473778	15777757	18421430	1414351	183989	3018264	4731915	1.78056e+06	1773349	8680527	1049312	965967	5124305	3016370	770019	688562	2154056	4632311	611256	2127199	5628628	5439923	9316095	2609576	299247	1332981	4.11981e+06	2693440	1666979	5230246	1033787	3.67206e+06	1323015	3169733	635279	562433	3612472
		3-hydroxyphenylacetatoylcarnitine	52933	LC/MS Pos Early	100006618	2808	296.149	-	-	-	-	1537920	12327849	1523782	56439152	2047775	ND	36685760	11108293	1408247	398584	43150032	4489100	1109414	40948288	13517496	2307514	811741	2404015	8769383	3074735	775503	14686135	552715	28172100	6835519	ND	22291306	10792120	596489	2045496	13526990	7539276	13561983	4154127	10405307	3017619	253313	2564381
		3-methoxytyramine	38630	LC/MS Pos Early	118	2635	168.102	1477-68-5	1669	C05587	HMDB00022	8357689	2785747	561605	1507673	948598	873660	1137560	1350770	826845	1884749	1317614	1231066	1307156	795894	769268	978510	1384744	1761999	1157382	1416323	3223030	2103786	ND	1474942	1067477	943766	775371	1306180	848396	942308	1087495	715983	512307	3214531	873570	1269381	1240483	1749750
		3-methoxytyramine sulfate	44618	LC/MS Neg	100004634	1722	246.044	-	-	-	-	15304002	788899	1390532	1380196	650181	431116	616871	2055617	284741	1266398	2107448	716837	652142	1133382	637555	703865	540806	1491374	1077047	758479	12801365	726610	2419336	1049257	1050101	477639	705716	1442273	440491	313353	958178	377395	686781	548923	612690	927626	502671	1285210
		3-methoxytyrosine	12017	LC/MS Pos Early	1342	2555	212.092	300-48-1	1670	-	HMDB01434	60523616	7042521	ND	2.3352e+06	2583371	2111311	3773406	3.70353e+06	1171536	4182464	2756317	1665290	2109792	1801406	1661820	1842654	1393446	3925244	2306545	4194973	135580368	5680566	1272791	2194492	2147417	744806	2974679	2471503	1615363	2494405	2069768	1349322	1485326	1523423	1896590	2709333	2110683	3212148
		4-hydroxycinnamate sulfate	48410	LC/MS Neg	100006095	1000	242.997	376374-66-2	6070438	-	-	1596162	552319	1263698	284636	564516	244523	274023	796348	878213	1718573	4091496	1995945	318791	561497	1.48548e+06	3067463	577213	1648560	1880600	2695212	804169	1031895	3903630	795736	2278425	256106	253874	1537073	528141	958425	2506620	705765	862474	291959	2124382	2049387	570702	2143891
		4-hydroxyphenylacetate	541	LC/MS Neg	144	1361.1	151.04	156-38-7	127	C00642	HMDB00020	22000886	30715600	34392112	23612974	20788736	35789376	39116848	26792184	10027840	125482816	92504968	28171184	22170714	67652080	15257266	33686816	29025686	113242880	24215912	65453156	29272204	46136680	67043144	29383812	25547856	43554244	21509012	23286416	14062192	70104984	37668548	10121923	74697960	11198066	23077668	35060364	45331892	103102272
		4-hydroxyphenylacetatoylcarnitine	52932	LC/MS Pos Early	100006619	2730	296.149	-	-	-	-	5020776	11478676	1891586	6158957	8811939	20453348	22079444	10470332	3652539	40565616	40435456	17453172	7.59544e+06	42697808	10806052	23775648	17166110	29181158	12484938	44358640	7.90774e+06	14870267	5386658	7403811	11732268	14824371	13986716	10047177	3.74513e+06	68980624	16487990	6347641	22903088	4000755	13782269	19568726	17063994	22168158
		4-hydroxyphenylpyruvate	1669	LC/MS Neg	1141	1690.1	179.035	156-39-8	979	C01179	HMDB00707	1469886	190026	ND	1354315	1001526	ND	ND	ND	ND	263744	690082	408995	535965	749764	ND	130287	537957	3338239	2037698	ND	3.33701e+06	ND	ND	ND	ND	ND	ND	ND	ND	696080	119717	ND	ND	ND	ND	514822	ND	2616744
		5-bromotryptophan	53242	LC/MS Neg	100009338	3525	280.993	-	96735	-	-	299332	125324	255679	424077	206586	110268	403896	451555	ND	507085	272969	240896	367614	247541	84067	342981	245493	553685	698532	318542	265495	108055	ND	401690	209731	120588	320002	345609	ND	221110	212957	151697	156984	253264	144159	554908	237474	316529
		5-hydroxymethyl-2-furoic acid	42040	LC/MS Neg	100003954	962	141.019	6338-41-6	80642	C20448	HMDB02432	3813092	4143704	1622405	1216243	1430115	858775	5059055	2119642	373939	1167952	6122920	4308148	468198	20322356	1187121	11110785	2925762	28071224	645483	5129417	1482338	4420862	7000011	943664	2492097	ND	753758	2162145	4061424	316250	5342204	656788	6072015	288242	1364794	2451872	11114455	16920188
		catechol glucuronide	53243	LC/MS Neg	100009326	1742	285.062	-	-	-	-	3.43538e+06	2051009	2938017	1595507	2.80221e+06	2043909	2381999	2151992	1635934	6431978	2669501	2347802	1405084	3725641	2465986	1132464	799224	3555638	6662885	6.08279e+06	1214990	4709559	10133637	1502672	2166669	980490	3.93846e+06	1701258	857090	1238522	2182680	2484072	5705951	477866	4088089	1535986	1724361	2576545
		dopamine	12130	LC/MS Pos Early	1748	2385	154.086	62-31-7	681	C03758	HMDB00073	28748808	3698513	2594640	1.69346e+06	1172777	1786538	2738443	3375293	1136489	4593355	3197750	2992419	2822763	3486457	1136676	2289176	2412503	4930280	307606	2334777	5.60061e+06	4515602	2735576	1843986	2044902	1911321	2403458	1.81399e+06	1.62545e+06	2241773	2493346	860204	941310	2006568	1221966	3076981	1676618	4.05488e+06
		dopamine 3-O-sulfate	48407	LC/MS Neg	100006361	1556.2	232.028	-	122136	C13690	HMDB06275	70430296	4.13852e+06	4792477	9483228	4088129	3050982	3.06562e+06	46091728	2891977	15635093	13694593	19474424	4201007	24543386	14432454	4373727	5415394	6456293	2625639	15920836	54168296	4290850	8232349	9357776	17462532	3736274	2500202	18992636	4209143	5066823	10309285	4.09038e+06	5236340	5289872	4956040	10152112	4444316	6.15381e+06
		dopamine 4-sulfate	48406	LC/MS Neg	100006360	1511	232.028	-	123932	C13691	HMDB04148	24998994	1630763	1450449	2310929	2147816	1879325	874840	9354071	944178	4916313	5685382	6358088	1906108	8449308	8.12769e+06	1337824	2265344	ND	804146	6.53294e+06	18914490	1666298	2.46961e+06	2542477	4218344	1323707	826150	6125717	1413259	2444948	3.99161e+06	1769360	2354125	1891747	1807650	2991172	1281037	1965909
		gentisate	18280	LC/MS Neg	100000447	1459.8	153.019	490-79-9	3469	C00628	HMDB00152	18659456	10950880	10372975	19685428	7206344	6032265	8274927	16267380	6267361	65022072	35070744	14416834	9875597	33773412	8571144	4460848	12309520	22843516	9237385	3420364	7.94973e+06	50619844	25696274	19650860	21699272	32968266	19506422	16516137	2150186	11263445	46912920	5913689	23530576	13419286	17773066	9168446	12823803	24856284
		homovanillate (HVA)	1101	LC/MS Neg	117	1649	181.051	306-08-1	1738	C05582	HMDB00118	47077276	8718649	9300825	12697862	9196246	5.32407e+06	7507297	12701174	3586820	37580808	18184292	11254398	9152860	10852378	7969692	6111107	6746682	23162118	7041697	13657825	37767164	10970029	24656880	10411623	9126203	4540189	6887866	11387204	5472147	14459974	12426452	5594958	11693573	5341916	7236754	11187368	8300078	14368840
		homovanillate sulfate	38349	LC/MS Neg	100002250	1047	261.007	38339-06-9	29981063	-	HMDB11719	20407896	3446113	14527067	3015046	6963805	1721444	2851003	5819285	1803519	18862888	8532618	2936368	3159715	6391757	4363036	5049942	2380061	5576263	5863506	6558197	10402837	5416801	16615820	2132119	6187802	2098443	2785436	4728065	2378204	7489462	5649853	1304555	4923650	1851139	2729859	7662331	2389043	5166385
		m-tyramine	39581	LC/MS Pos Early	100002797	2701	138.091	588-05-6	11492	-	HMDB04989	2459832	2173764	1817769	1.87233e+06	2230771	1696225	2422646	3574306	1648592	2257686	2783226	1.64689e+06	3245764	1627481	1364628	2819262	1648682	6254457	2843661	3294934	2.30754e+06	2029663	2.74936e+06	2404221	2742715	1662418	2357002	1770431	1893317	2099920	2077148	1304580	1092046	2513692	1045680	2859458	979850	2808204
		N-acetylphenylalanine	33950	LC/MS Neg	100001256	2597	206.082	2018-61-3	74839	C03519	HMDB00512	4235905	3875586	9265277	4426560	3034887	1116950	2160697	2.01355e+06	3222186	14099664	4475985	2347086	2169903	5397846	3162982	3157020	3123581	10279425	4.06222e+06	4326130	4437818	4536418	15068428	5764036	3864019	828101	1695639	1497001	5072122	5817770	2005650	1618662	7095527	2022501	2674483	3355824	3173747	6851461
		N-acetyltyrosine	32390	LC/MS Neg	100001104	1680	222.077	537-55-3	68310	-	HMDB00866	8529927	4734539	9354164	7333316	4911696	1098995	4.01711e+06	3715921	5520791	13243053	7201297	2974218	3807935	4785656	4562653	4696191	5705430	13646128	7185010	6014650	8851568	5440707	23932292	10600606	4583264	1276839	2.77351e+06	2836161	8707424	6164822	2800992	2616991	7966202	2523212	3457402	5543110	5514600	9225990
		N-formylphenylalanine	48433	LC/MS Neg	100006056	2360	192.067	13200-85-6	759256	-	-	236366	174962	322634	136957	172909	83448.8	185555	1697783	70099	174876	547515	ND	133112	588351	163343	360849	73379.5	754980	158508	112547	ND	361178	ND	108703	131727	129430	73879.2	237171	295721	92520.5	154329	137343	230924	96893.2	130371	225164	142191	847704
		o-cresol sulfate	36845	LC/MS Neg	100001806	2796	187.007	-	11615528	-	-	1604774	4742543	7.96515e+06	1467689	1174244	726403	500523	2885326	1379616	1573865	2295044	2742819	604669	434803	1371468	442719	1383768	13060202	1507009	3.95521e+06	796019	6.80064e+06	38655948	4541122	3.77961e+06	341546	564496	2.08251e+06	1354972	946976	3540764	299224	463951	637383	2010908	4131523	493829	2043529
		p-cresol sulfate	36103	LC/MS Neg	100001315	2890	187.007	3233-57-7	4615423	C01468	HMDB11635	5192700928	5786409984	10462826496	3395542016	2239160064	1503946880	1171754496	4524137984	4108771840	1908807296	4918475776	5529337856	3134030080	5130537472	342576448	48928140	3424428800	8055948288	4543866880	4234736384	3675834880	7210293760	13350941696	2364499456	2083957120	3993052672	1214034944	2928943872	5181215232	1407063168	2045834752	3453334528	8292186112	1398141184	1486019840	198492336	2969208320	5878835200
		p-cresol-glucuronide*	48841	LC/MS Neg	100006191	2420	283.082	17680-99-8	154035	-	HMDB11686	228913328	355257184	264424320	127233960	61892080	90218608	28574254	108250832	142730336	55271600	140296928	225112080	84425920	260061600	10711719	707968	260177952	239714720	178402320	156414176	141173328	529794080	684839040	70048160	48706424	330052832	32984892	74832848	152964256	51152032	28229284	151576192	580183296	32932370	83513952	9424423	219505984	179660848
		phenethylamine	12142	LC/MS Pos Early	1207	3065	122.096	64-04-0	1001	C05332	HMDB02017	ND	1104436	616249	ND	ND	ND	329489	438006	ND	2951968	1469411	ND	ND	1498272	403805	700741	ND	608435	ND	573519	425244	738534	ND	ND	ND	441973	ND	186985	ND	5100950	ND	ND	ND	634378	831081	ND	ND	764698
		phenol sulfate	32553	LC/MS Neg	100001510	2156	172.991	937-34-8	74426	C02180	HMDB60015	380549920	590544320	1407285248	319989664	486613696	304761472	252920960	435590816	241884480	1200653056	605473280	293496384	750675072	834629568	759255552	63873324	437863456	4037775360	4178203648	398332704	286418720	642255936	4179512576	367990272	693705984	779997440	219046800	295846112	314929248	280614240	582087168	215489200	569884544	337960384	726441984	94627168	126207592	2227053056
		phenylalanine	64	LC/MS Pos Early	460	2878	166.086	63-91-2	6140	C00079	HMDB00159	149524880	181120496	109093984	147936592	126875792	49731588	153178752	142500032	29320780	295813248	175361344	108816672	235630272	98191192	79228080	153306128	98766784	270078592	125189072	109849776	132421704	191532208	143171952	162202256	168191632	59619572	142965904	84403824	42113812	217860272	123754168	88067376	97917432	184293632	83968280	223407376	101276776	169246448
		phenyllactate (PLA)	22130	LC/MS Neg	100000774	2208	165.056	828-01-3	3848	C05607	HMDB00779	5508936	883369	750441	1312698	953557	499779	1380195	3437426	1313171	3497877	2541859	693057	1605245	2834103	1677817	2857904	647292	4893798	2295732	1581287	8336604	866559	2955702	2209189	667653	485907	838672	2573794	1872211	3031915	1003659	981154	2264710	1313769	2275105	1664695	739820	4961085
		phenylpropionylglycine	35434	LC/MS Neg	100001591	2945.3	206.082	56613-60-6	152323	-	HMDB00860	943783	1183144	289544	1860478	571922	50272	3261824	1417057	1424937	192573	1734630	1720952	143401	2252703	ND	120032	252195	339598	253030	270349	449452	1748332	972219	1831853	954297	ND	3063064	1478379	1803721	80108	1319955	1308505	2698690	102357	52275	653378	115790	308224
		tyramine	1603	LC/MS Pos Early	1133	2540	138.091	60-19-5	5610	C00483	HMDB00306	1447690	11169528	1540594	12295747	7390861	9536075	19263560	6882838	6005233	17448162	22172938	4307383	22430708	6635111	6010211	13810185	11630097	12734146	10571204	19376052	672595	9435120	1944538	14736562	6650505	13113929	14982963	6088228	7972045	15655126	17765788	5285946	3887431	16646792	5434319	15487395	9218637	12898286
		tyramine O-sulfate	48408	LC/MS Neg	100006092	1565	216.034	30223-92-8	153005	-	HMDB06409	1.8449e+06	1986169	2694988	3155723	2963560	7.93745e+06	2541500	3353502	754531	4926949	10677983	9104921	1856913	6142757	2441536	5881495	2637923	27886222	3352034	3037703	9343966	2148454	7.40365e+06	1958067	2112084	12896954	3386017	894940	1058629	4335975	4826993	2.00861e+06	9369734	3223703	1067592	5361616	2700285	7.22036e+06
		tyrosine	1299	LC/MS Pos Early	815	2430	182.081	60-18-4	6057	C00082	HMDB00158	132041264	95354936	46743284	105895992	94484688	44417064	162112416	96682272	15709293	138369808	124246656	59605052	178016000	57792744	62992080	124786352	97752840	181898048	140681264	71328672	136494720	105812280	68420336	137442096	82701096	46605672	159027536	77614728	18117764	128833592	91931408	80269184	49247376	145636096	50775996	165258864	82064824	103061112
		vanillactate	54910	LC/MS Neg	100006129	1625	211.061	2475-56-1	160637	-	HMDB00913	82292584	3881754	6117526	2372196	1.97299e+06	746161	1.86693e+06	3.35804e+06	851369	7227436	6582215	3058661	3305989	5306804	1530095	3299146	2416202	4253991	2547360	2405072	322791456	7.73776e+06	9979018	3096408	3447217	825818	1.85443e+06	4605940	1.0432e+06	7575642	3.51516e+06	972805	4035333	1595515	3544857	4055141	2197862	4640988
		vanillic alcohol sulfate	48733	LC/MS Neg	100006125	1808	233.013	754920-02-0	-	-	-	3336079	4390229	3381305	1962719	10003587	19658200	20527860	17306940	5556888	3514602	9204957	26395916	5520984	29335580	1347363	9696868	3438468	71898336	10378430	54938144	13583574	10827074	10858729	6177134	7824852	4406783	3417217	2684265	13085603	7663272	12841464	22333332	14929951	1116443	1511109	15620066	614238	127420632
		vanillylmandelate (VMA)	1567	LC/MS Neg	1111	941	197.046	55-10-7	1245	C05584	HMDB00291	52691060	49772304	84972312	46497376	26670652	17750516	32202350	39538064	12048360	57998348	64561776	63339376	42452416	43971788	19204364	34827964	24932760	71613240	43694612	58843848	50048968	57534364	73165824	49879440	35015640	21191376	30239048	31949532	14988905	28991500	45897012	30687288	32217082	24771994	21983272	51447320	25908964	45489040
	Polyamine Metabolism	4-acetamidobutanoate	1558	LC/MS Pos Early	1113	1350	146.081	3025-96-5	18189	C02946	HMDB03681	311982304	305706496	362854656	293890432	224785968	200761792	262280448	217206992	127432152	473260448	422155936	280051616	300764320	334560064	183213056	272435200	259851056	396867104	275623168	295245888	261643632	302135456	279229408	310045536	187015216	174455248	243459424	194646272	154834192	248502768	374426272	220487760	340857696	213036480	247586320	328569408	259121728	288908704
		5-methylthioadenosine (MTA)	1419	LC/MS Pos Early	212	2752	298.097	2457-80-9	439176	C00170	HMDB01173	25855384	17837576	7299459	16154553	18178876	10097440	11989680	13814049	7540006	16313374	17437984	21010200	12824472	19134168	12096177	14424335	10471763	21779898	25862020	12670276	19636624	14585259	8.1635e+06	14877716	39464320	18258962	11351986	22643708	9499316	13322118	18153076	10793750	21414904	8844110	14138270	17000004	17128948	20985000
		acisoga	43258	LC/MS Neg	100004541	2297	183.114	106692-36-8	129397	-	-	1685488	4234875	7581887	3618829	1.81934e+06	1002033	2.06122e+06	3449588	751291	7581962	4707104	2505912	3450852	2296203	801790	2261010	1615878	5780041	4.14606e+06	3340155	1532870	4293724	7454423	2670886	4431899	1448644	2.01442e+06	2143229	671915	1704345	2251368	1911887	2518257	1922388	1650581	4751062	1629004	2494704
		N(4)-acetylspermidine	32356	LC/MS Pos Early	100001214	3095	188.176	66039-56-3	128317	-	-	56298864	79925008	94392976	74969096	48340196	31785920	60903416	74983048	27989282	158900048	153284768	78547344	67263704	57202080	34597732	58597772	65164284	132981856	60846620	91933808	58225520	76636816	57515524	71949472	55182240	32381862	59111220	54867044	29604514	73643760	111808280	49706264	31054096	51301104	56083436	87116176	57032872	99604384
		N1,N12-diacetylspermine	52987	LC/MS Pos Early	100002132	3105	287.244	61345-83-3	132680	C03413	HMDB02172	4621685	6205742	12122148	4210198	1862005	700812	3154295	5978787	1127069	8.05491e+06	6975610	3.64778e+06	3664295	3105673	1383437	2549331	2981505	9072114	6889790	6113169	3800472	4640994	7431315	4819940	2991685	799367	3495925	3544607	1235349	2568172	4011993	2192516	2895052	2046540	2446498	5860504	3700789	4675953
		N-acetylputrescine	37496	LC/MS Pos Early	192	2230	131.118	18233-70-0	122356	C02714	HMDB02064	225868256	222971616	118455016	252879552	159432144	151992720	238971808	220632608	156306080	308252928	404794784	271099488	330729632	365018176	111322696	253572240	254852464	327470720	201043872	248106704	226736656	249082272	115164832	260145744	200769152	157740624	203288160	204677360	169897648	155458208	327734272	151229312	331523520	216235680	189714560	336994944	275838496	348193536
		spermidine	485	LC/MS Pos Early	50	3355	146.165	124-20-9	1102	C00315	HMDB01257	83561	ND	433559	ND	448815	114992	ND	76961	ND	485248	926128	286959	313990	622552	57148	778502	146617	767551	842525	292817	224866	247500	261001	ND	743612	181286	ND	ND	ND	134507	700447	ND	265897	87852	113296	610288	55866	453945
	Tryptophan Metabolism	3-hydroxyanthranilate	32353	LC/MS Pos Early	243	2407	154.05	548-93-6	86	C00632	HMDB01476	1356030	2492023	ND	3320925	395107	ND	4081588	2178803	ND	1957074	2669103	1669765	4230189	2401355	2823550	4420655	5112796	3663440	3742551	504096	1396994	3345107	1878222	7668778	1289807	795597	5338510	1701882	545273	1704495	1609760	1479116	6938554	7934147	2798674	8897609	4127953	1532062
		3-hydroxykynurenine	22110	LC/MS Pos Early	100000986	2536	225.087	2147-61-7	89	C02794	HMDB00732	3293375	914339	1092461	660161	ND	ND	1557120	716559	ND	1547025	1004770	538530	2481308	409083	ND	1279086	628924	951252	1638487	ND	77650296	1.12785e+06	1225921	920051	498504	ND	1493206	613058	ND	744870	737559	552120	936399	1273750	ND	2379543	819695	670112
		3-indoxyl sulfate	27672	LC/MS Neg	100000467	2222.2	212.002	2642-37-7	10258	-	HMDB00682	1026683904	580340480	1862519168	709389696	766609408	452562624	468420128	563991168	259993568	1814547584	855741184	495463712	983877888	1238941696	472805536	302475360	1009773952	2802743296	1335886848	1757706496	506789120	926546112	3056128256	823743680	868608896	977055360	385421824	366425984	301323936	965053952	496871296	319652256	1551824640	540598144	659120192	337170496	1181478912	2070103552
		5-hydroxyindole sulfate	52914	LC/MS Neg	100009042	1928	212.002	-	-	-	-	149758	428411	2741618	797284	510811	ND	637697	381042	290120	2088697	1088411	352824	525155	928912	125071	373975	691197	2448640	1824990	1268095	ND	507020	2313837	1405428	746771	305291	712173	769208	387995	776370	910840	532139	1.47911e+06	253794	651021	443000	1144987	1600547
		5-hydroxyindoleacetate	437	LC/MS Neg	71	1510.2	190.051	54-16-0	1826	C05635	HMDB00763	14966972	7279933	20800256	9337768	4225594	2604478	5308781	14635084	2894563	15055023	14037718	13568850	7.50009e+06	11065181	3563671	7523580	5891056	14723310	7253585	11424052	8.15325e+06	8401824	20440168	9268220	11385191	3236702	5287962	7145533	3838673	6424868	9258315	3257447	10709080	4161988	6572357	11098270	5288472	8979727
		7-hydroxyindole sulfate	52915	LC/MS Neg	100009043	1765	212.002	-	-	-	-	110091	985636	814193	180081	171894	52062	188398	55696	146852	3.55337e+06	405038	155803	422993	148870	81607	79968	132642	1494598	397998	822428	85108	1048508	1321131	212295	ND	133786	110389	ND	97943	917697	223421	208604	196026	344132	81764	82888	145324	975825
		anthranilate	4970	LC/MS Pos Early	1258	2606	138.055	118-92-3	227	C00108	HMDB01123	1194701	830839	1396784	ND	994427	992054	ND	1213939	ND	1166934	1013960	367288	950085	1.41708e+06	ND	ND	508737	1344557	1326534	1763654	ND	781499	3097955	1095403	1399790	1680533	ND	829027	646568	960561	476184	ND	1771332	517086	871107	684474	1195387	1005205
		C-glycosyltryptophan	48782	LC/MS Pos Early	100006379	2685	367.15	180509-18-6	10981970	-	-	22739696	25581292	21923140	24800124	19316048	11664826	18238380	23943236	11325115	26615240	22723132	19889332	19962772	24319840	13567639	18789638	28196058	19710360	22150304	27769422	16171368	23900344	22426536	23218120	19544192	11649493	16317103	22278442	12919740	20997720	20945744	15241428	19914036	9770714	16263424	20898932	25449906	18837660
		indole-3-carboxylic acid	38116	LC/MS Neg	100002185	1708.8	160.04	771-50-6	69867	C19837	HMDB03320	255185	557233	ND	ND	147870	155737	113315	365509	291841	273053	262094	424931	138473	289756	ND	ND	130498	906291	107904	591839	116059	891811	123402	152174	193009	ND	65892	208650	303121	ND	ND	69731	497098	28268	79445	977292	ND	461146
		indoleacetate	27513	LC/MS Pos Early	100001034	2850	176.071	6505-45-9	802	C00954	HMDB00197	115470560	187441632	62146052	299049088	164333168	326763264	192768432	236660784	113600208	238223968	269761408	153093856	109906496	99858456	141918656	187168720	70752464	209063824	199815872	258911424	82814928	189259296	54561888	568989760	241301792	309532192	207972080	251865088	144277776	120347064	180705568	231343648	183581312	85426168	175397728	249466400	187231984	108823840
		indoleacetylglutamine	42087	LC/MS Neg	100001731	2535	302.115	-	25200879	-	HMDB13240	10870510	18222356	8056283	30784176	12950612	22715068	12618313	14637783	10027106	91719656	36554640	16724293	7255444	24756190	1506397	23871672	6153897	84604088	10684440	20271800	9895362	16589950	11912590	57192556	19040920	27630164	10406540	10840858	11890858	38015616	20994842	16019930	27810052	3072821	1489819	39477700	5990032	37849600
		indoleacetylglycine	54730	LC/MS Neg	100006730	2610	231.078	-	446640	-	-	192710	265560	150256	557774	101802	365411	341615	279114	223368	1442472	625272	406255	110331	839763	ND	563765	115067	1402134	353869	253220	210457	237293	381117	1210938	211979	382482	221845	185833	289086	1036873	292862	433889	826982	29641	ND	1218390	136118	634861
		indolelactate	18349	LC/MS Neg	100000463	2286	204.067	832-97-3	92904	C02043	HMDB00671	28522564	10982271	22720788	21630560	6882712	4632750	14994020	23998908	9334673	48162056	28597742	5194464	13589873	18238012	9938940	11300752	7197567	38438748	28135800	13056403	42143620	16279801	32523742	36711064	12315130	8368838	11601433	22063144	13566498	20771354	15750567	4233970	29015562	10550622	19506408	14415736	5187661	32548608
		indolepropionate	32405	LC/MS Neg	100001083	2795	188.072	830-96-6	3744	-	HMDB02302	ND	614835	81748	33260	ND	ND	156538	86649	36370	ND	46828	24701	ND	ND	30001	ND	31990	ND	ND	1068549	72837	342510	ND	39938	135677	ND	ND	267798	105794	111356	68171	ND	169758	99408	163428	199075	ND	29207
		indolepropionylglycine	54917	LC/MS Neg	100010863	2926	245.093	-	7677842	-	-	6411550	13054460	9271630	16916658	1295055	2116791	9333666	8156137	7557960	6.09288e+06	17976198	14996038	14125370	12632774	9027153	ND	5868450	14295356	6545731	4454998	5343970	14447401	8422731	20532552	2997140	2227306	11118781	11741969	9577779	905576	26987136	11565282	20323232	17025004	13402909	377091	9449966	12150298
		kynurenate	1417	LC/MS Pos Early	98	2385	190.05	492-27-3	3845	C01717	HMDB00715	60396736	59819328	77088304	113421224	66825700	12914527	63419128	85654392	31838296	61378356	139378176	49956224	86078960	78463728	48014048	97163536	50996928	130638960	103864888	73908920	85446680	76845960	76917744	144162128	98913056	26094708	59809220	77977840	50147576	81952984	109947992	32449100	64638036	100202584	40472720	99265728	43786696	74954328
		kynurenine	15140	LC/MS Pos Early	100000265	2739	209.092	2922-83-0	161166	C00328	HMDB00684	5474743	3634237	4945965	2339506	4859164	1431179	12444969	6646121	3528995	5946200	3612930	1958177	5388835	2304137	976815	5808834	2291849	6185211	6708350	3295122	12224176	2907533	7858602	4260816	4975716	2262551	10423115	4473576	2980152	3770360	2836158	1851290	5833417	3728774	1025466	10960582	1845037	3272119
		N-acetylkynurenine (2)	48757	LC/MS Neg	100006378	2378	249.088	-	-	-	-	244050	140757	869437	122917	366186	57835	181767	377190	809033	347671	209650	64835	80959	410758	121560	177898	164542	344551	389677	269725	701951	157615	2183034	333906	385625	44636	150536	242070	1486656	159635	86853	78521	1869003	48607	96800	242243	125903	173048
		N-acetyltryptophan	33959	LC/MS Neg	100001254	2630	245.093	1218-34-4	700653	C03137	HMDB13713	2496058	1705920	3805432	1936496	1457678	816189	1326356	2676258	711293	4316327	2412440	1390978	1241673	1942730	805587	2035840	1.95208e+06	6904365	3151302	1049667	2796097	1909835	6063978	3446535	1627066	897658	1069625	2117404	949837	1785114	1.01087e+06	882878	3044421	891699	888589	2759965	2262443	3757895
		N-formylanthranilic acid	43549	LC/MS Neg	100004561	2150	164.035	3342-77-6	101399	C05653	HMDB04089	4205406	3497757	3.73167e+06	11403266	5363750	3237438	3.32143e+06	6839350	3.0719e+06	6269631	14921450	3373624	4795492	2822934	2611928	4989294	3.11095e+06	9235046	8910510	7.7481e+06	3064032	3310591	6533873	15008200	3.88592e+06	6126648	2748910	4680893	2997114	4512884	11004334	3069781	6867419	4051914	3701707	6557717	7.21473e+06	6.46672e+06
		picolinate	1512	LC/MS Pos Early	1022	910	124.039	98-98-6	1018	C10164	HMDB02243	7.35558e+06	3829756	6928377	11211169	4295940	1.88451e+06	5529881	16387425	2381604	6709807	8377661	2567244	9865308	5006688	6950584	8.24908e+06	4826393	12686299	8448140	6953663	5031868	5749048	5698491	15448855	6690801	3511573	5924309	11983122	3813466	3106405	5243736	3023628	6397173	10308923	7215230	14389859	5828649	5284043
		serotonin	2342	LC/MS Pos Early	504	2550	177.102	153-98-0	5202	C00780	HMDB00259	1358956	1619969	896766	2024848	2269730	812911	2132464	1245552	726278	2227750	2306632	1816361	2190041	1282736	871838	1774356	1861270	1929134	1.74579e+06	2.04678e+06	1261719	1378582	930882	2865192	3993952	904804	1867084	943911	853600	1304934	2110323	1103905	782223	1.54431e+06	1256210	2434643	1921022	1.62521e+06
		tryptamine	6104	LC/MS Pos Early	1095	3062	161.107	61-54-1	1150	C00398	HMDB00303	464320	5079236	2927142	4844561	1350081	2363481	5849964	2658465	2.04926e+06	16217898	5311273	926909	4484917	2143751	414334	3681577	1619993	13010320	2784855	3.86252e+06	154616	2735524	2166055	6467493	1140568	4210239	4721416	1738502	2789480	7350753	3.87426e+06	871584	693433	4875037	495048	6348784	1313206	9674557
		tryptophan	54	LC/MS Pos Early	565	2986	205.097	73-22-3	6305	C00078	HMDB00929	129706000	110836248	66652968	147881728	98948872	34799380	168381600	138495728	15122926	194080992	121499616	75793520	168335968	67899552	43560376	112917984	82035960	203263424	206010080	82678640	118009856	114184304	83482224	221128416	120758616	50162204	148027136	111186904	21304708	129351656	96681544	60166824	68455256	124721720	59993968	183332672	86705192	121724288
		tryptophan betaine	37097	LC/MS Pos Early	100001743	2673	247.144	20671-76-5	442106	C09213	HMDB61115	42038852	39314072	10063874	5359486	22877816	8.29542e+06	125142496	14774060	8980327	64127116	15339370	41684772	10214910	41889276	53512860	21738660	44446728	86555904	41483928	46293940	28759456	21719514	40780352	5273704	26181808	10646994	91419184	11432185	5492428	39635992	6585344	37533628	22821226	4794426	77864120	38676672	36077116	40379232
		xanthurenate	15679	LC/MS Neg	100000015	1476	204.03	59-007	5699	C02470	HMDB00881	3933371	2275397	7001987	9833500	3653027	830516	1816478	3226649	753408	2653362	11351585	2498732	3959075	8116977	2228940	6.95081e+06	2529017	8913863	7887497	3309038	5575073	4135107	6118085	13607155	3023625	2610090	1.86304e+06	2741383	1280883	4292371	8477281	1555238	3.82719e+06	5403797	1553946	6071477	1926494	4425870
	Urea cycle; Arginine and Proline Metabolism	2-oxoarginine*	55072	LC/MS Neg	100002784	963	172.073	3715-10-04	558	C03771	HMDB04225	1456214	722231	2438642	6119118	1310815	ND	315774	ND	ND	724955	4284410	1779708	1241500	2439173	646633	1.83291e+06	1389665	6.27421e+06	2362044	ND	1.81913e+06	1444835	395755	1659535	ND	83787	119018	ND	ND	965439	1275423	326291	ND	790521	ND	2.05262e+06	515735	3332945
		argininate*	57461	LC/MS Pos Early	100002769	2150	176.103	157-07-3	160437	-	HMDB03148	19200776	13263241	22849332	42522336	13364092	8005202	41469800	17535432	6566715	24276228	28576752	12042281	22116446	18326512	14819969	36601536	17690314	49103124	28674434	22205568	24152116	19065396	23646752	36201196	25593704	49418464	33224472	15673672	8513674	15301667	21789910	6255295	15537510	34880188	12705242	45451452	17280040	28917666
		arginine	1638	LC/MS Pos Early	231	2825	175.119	1119-34-2	232	C00062	HMDB00517	71921984	55673412	39719440	45816612	42794080	26606366	52561008	66833160	21671804	87039480	101924320	87290288	55321528	80305264	35644784	44406896	29721784	104581440	18740968	91693016	57123008	58969540	53863872	41187528	61293972	35014104	52046352	27195694	42507260	53350748	51554080	50547740	45317932	47189636	46347664	51681692	33812172	65060064
		argininosuccinate	15497	LC/MS Pos Early	232	2745	291.13	156637-58-0	16950;828	C03406	HMDB00052	2924109	3987712	3904504	7.36384e+06	2323103	1140185	7488296	3010871	1400433	9494835	4778916	4259182	2786524	5125559	4123709	9342245	4226808	11908310	1473981	6390297	2415080	3656052	4746352	8940269	5685346	2196689	6151757	2629475	1951734	4601912	3750730	4200593	8585750	1909021	6946156	10047918	6846010	12503467
		citrulline	2132	LC/MS Pos Early	391	1520	176.103	372-75-8	9750	C00327	HMDB00904	5699537	25642828	16891614	11145573	16610199	7.83414e+06	28505388	7761663	1868150	19751580	18837462	6980907	14785509	15109601	7585637	12899218	13487963	35699184	961470	8884157	13593229	15324507	9909699	14071812	10181274	5507092	22185188	4232434	4608830	7938549	15032155	8923687	8389955	13402394	7802265	20620642	11310620	18312500
		dimethylarginine (SDMA + ADMA)	36808	LC/MS Pos Early	100001810	2850	203.15	102783-24-4	123831	C03626	HMDB01539	808538560	881416576	1005217216	881937600	723592640	417721632	777012288	831444032	349402144	1253183360	1033681856	684904256	826094016	631251648	454704576	703130880	583323520	1389940736	876728704	708705920	675128192	833794816	788771264	875129280	1023925824	483280352	724753408	631378560	387827424	680055872	824971712	486972352	628251968	599386176	689715456	1005163584	675724864	1017320960
		homoarginine	22137	LC/MS Pos Early	100000961	2882	189.135	156-86-5	9085	C01924	HMDB00670	1645231	1520950	721327	1914696	1962834	544554	3820749	670488	539294	4030388	2909171	1602886	6790960	1696567	312717	943785	862483	62928556	1750619	2154124	1127352	1595293	490213	2467304	1.62122e+06	1.69538e+06	4287912	204853	562052	2037724	2209632	1335148	1464799	6767270	585674	1336446	689218	13752168
		homocitrulline	22138	LC/MS Pos Early	100000963	1908	190.119	1190-49-4	65072	C02427	HMDB00679	72617192	45605824	59585368	42528240	30226968	16665449	40117380	54873988	23708446	215606368	155683792	47412328	50867312	76015440	29175144	80972864	65582844	93116064	48996820	29251184	130970976	78366264	140031664	53732916	61745692	32896732	38351528	27003548	21098272	28751408	54647068	66967268	86609424	40539176	33503802	115682608	64591712	43148100
		methylurea	34378	LC/MS Pos Early	100001401	807	75.0553	598-50-5	11719	C16363	-	1.99843e+06	1027346	3209665	1464353	2368857	420541	1085593	3141471	893896	3757916	1561886	1025826	1092348	2327301	1746261	414336	874868	1622319	2327008	2995375	1.92608e+06	1887128	2603464	1670701	4.10385e+06	2013555	2456914	2062989	1185200	2526292	1749417	1817429	2752524	1416311	2381685	901314	834870	1289618
		N2,N5-diacetylornithine	43591	LC/MS Neg	100004575	1367	215.104	39825-23-5	10398396	-	-	32131570	26903660	60153404	36914872	16337010	6040616	13668149	22056604	10193842	98016424	71909568	21075606	29342804	24571152	29479364	31042752	19000764	70701136	30881572	33247320	36233500	34763528	86152888	30591312	13748641	8309336	21329508	24802586	11779797	40329620	51504504	23499690	45895424	27721464	67069744	51128360	33904728	52390416
		N-acetylarginine	33953	LC/MS Pos Early	100001266	2245	217.13	155-84-0	67427	C02562	HMDB04620	199319136	233142064	140666592	441738400	265490656	15404647	267825808	137609472	149769664	378018560	226722576	193514944	250711888	169066288	260713952	164581040	219263344	306633824	201974144	380064128	222061120	227650304	170331824	458740864	218572848	25089620	223285984	133531424	175446288	332859872	225542992	114983392	158385792	275330848	306401760	167806896	236607312	267126144
		N-acetylcitrulline	48434	LC/MS Pos Early	100001577	1010	218.114	33965-42-3	656979	C15532	HMDB00856	23375740	29293108	61925644	70287576	56018308	1613237	24605348	14200352	27663836	74058664	43136864	30140250	27518562	26525666	40706336	27612592	30242340	55409200	27906512	57515400	30587978	29053920	53019428	71133880	52428388	2385119	17255642	16736572	41446888	46053664	27476408	11968160	30153756	29457524	49123048	22554424	30958364	47255152
		N-acetylproline	34387	LC/MS Pos Early	100001334	1695	158.081	1074-79-9	322640	-	-	8937011	9996318	49071856	17713210	12944411	4474058	15160792	9814632	6225773	181634816	82165544	17259960	5185636	49371620	9030307	20981484	5394170	54425976	4744676	10462208	9994461	11083434	10989796	13029403	73631432	3029358	9323173	22018988	16101028	14727102	63127572	14405951	21370732	8785095	7131612	29360164	6081519	46477100
		N-alpha-acetylornithine	32984	LC/MS Pos Early	100000285	2000	175.108	6205-08-09	439232	C00437	HMDB03357	2122867	1198841	2540961	2114895	1600521	715282	1098259	3194502	1261220	2777686	3209304	1365977	801536	1503157	4689828	1515058	1546382	3397029	2247797	2336178	1.75103e+06	870498	3308330	1975700	1356008	956064	747185	1783077	1269787	1955877	2604426	1443096	1.00832e+06	838292	1597289	1343926	1897564	1474792
		N-delta-acetylornithine	43249	LC/MS Neg	100004523	858	173.093	-	9920500	-	-	908696	751738	803156	219574	365960	740128	1267649	1459818	176987	1220292	2182119	483286	733459	474364	324231	1564750	345756	4452901	1188264	456267	878705	1239089	963394	283165	366085	1248097	1659213	1156867	185381	485658	1.87787e+06	562283	820824	801116	650296	3022988	570638	3071090
		N-methylproline	37431	LC/MS Pos Early	100001956	1335	130.086	475-11-6	557	-	-	82570920	32961684	28413292	84560744	19758582	6740593	27691144	318852224	8518820	53813228	172655616	51185008	166444384	36364644	307559072	126480512	52779548	31391506	37338108	8653169	19228420	60025332	36709996	34859900	140815584	14611575	21497716	322731200	9713125	83198200	122233880	58784868	32303068	36067444	394798976	492266112	37412412	10833884
		ornithine	1493	LC/MS Pos Early	444	2800	133.097	3184-13-2	6262	C00077	HMDB03374	20037460	19198468	17732490	10863979	15692837	8661357	13441978	13547848	6285039	20160032	26091838	14573232	16319703	18823736	13469641	14636817	10998940	51802288	9098169	17770028	26269542	15265330	23396572	10129257	11423371	17081996	13712442	7776449	6451754	17427556	21414446	13475090	9555284	15974962	11202734	16295333	11602037	26810066
		pro-hydroxy-pro	35127	LC/MS Pos Early	100001167	2128	229.118	18684-24-7	11673055	-	HMDB06695	191202240	370273792	203717968	302039424	270624096	161593840	175521072	202383264	216645632	573508032	248664400	289014048	146066288	311083648	182772960	267018496	169597744	377160928	182001088	171589024	179757584	314381792	458973344	208345856	236485904	142368208	112977824	139562880	224988688	240567648	212349984	115769760	334397312	174982816	307506240	299116416	141211840	249796576
		proline	1898	LC/MS Pos Early	480	1603	116.071	147-85-3	145742	C00148	HMDB00162	44551204	38385528	35758956	31143612	18577640	14385217	25440788	30749876	6838182	29925714	49196156	27023616	26513756	56421108	42089720	28196230	47102200	50200960	34178708	40957596	31312516	43230040	39937904	41974288	23923966	12099583	19481736	18842874	9204490	27556460	32966296	29971436	50780564	18478780	39561808	40988924	46148476	48662428
		trans-4-hydroxyproline	32306	LC/MS Pos Early	1001	1064	132.066	51-35-4	5810	C01157	HMDB00725	2287017	6238786	1.95334e+06	10548869	3840797	4419928	5409533	7.96859e+06	3981846	5.36907e+06	2417053	6.71443e+06	1800051	7890856	6221285	2873554	7869351	3260898	37511412	2506330	7450730	8276232	11825651	10157913	1912349	3.02533e+06	4224248	3.0197e+06	4485536	4991242	2642011	4993905	22440264	4815022	3779784	4850425	6234111	3182245
		urea	1670	LC/MS Pos Early	533	700	121.072	57-13-6	1176	C00086	HMDB00294	7608397824	7559185920	7795484160	9623858176	6442962944	3100819456	8130269184	8058872832	3435173376	11533523968	9481658368	5728589824	5582595072	8448634368	4515059712	6557094912	5992671232	11490541568	9561232384	8411404288	6974679552	7494338560	11288871936	8885425152	6741168128	4997124608	7563070464	6607727104	4754654208	8848124928	6951209984	5104648704	8336421888	6674080256	4622195712	8076301312	5138507776	8259990016
Carbohydrate	Advanced Glycation End-product	N6-carboxymethyllysine	36713	LC/MS Pos Early	100001768	2500	205.118	5746-04-03	-	-	-	10147866	13741378	10628777	5088743	5.71215e+06	6867709	9721201	12084998	4618791	16214034	15981660	8444975	7616659	11627684	7379514	17652256	11180164	15152586	21830432	11302712	22639190	10478285	20341194	6276696	17230164	15331647	11931513	11574178	8.34469e+06	9587104	8688842	6852757	10882984	6534232	6239445	20836404	11291992	15139006
	Aminosugar Metabolism	3'-a-sialyl-N-acetyllactosamine	40042	LC/MS Polar	100003257	3300	673.231	-	-	-	-	707540	1.07609e+06	799294	931063	1064143	341228	714596	1.17544e+06	206574	1.35937e+06	1.43792e+06	787830	527734	1.65375e+06	387887	588774	960104	1.46087e+06	1174619	1162801	579633	984262	981385	796014	1.87242e+06	390833	713434	962890	247346	582672	1.04045e+06	496803	1.11735e+06	397602	704897	1.01892e+06	1.01565e+06	1.44209e+06
		6-sialyl-N-acetyllactosamine	40428	LC/MS Polar	100003259	3641	673.231	174757-71-2	16212424	-	HMDB06584	928635	1.16052e+06	1.37524e+06	1.40266e+06	1.34808e+06	445834	987928	1.42188e+06	286944	1.43982e+06	1.86e+06	832708	482117	1.71485e+06	430996	454842	1.44143e+06	1475368	1.574e+06	1.61025e+06	757486	937405	1.77691e+06	1.10147e+06	2.43379e+06	555717	796269	1.07344e+06	332467	680006	1292607	504827	1.14681e+06	439726	764483	907617	1.50368e+06	1.24542e+06
		erythronate*	42420	LC/MS Polar	100001320	2186	135.03	88759-55-1	2781043	-	HMDB00613	1149630720	1712256000	2348624128	1169345536	1531502720	959888000	1329691264	2493969664	728794816	2285550336	2489746688	1237494400	1330556928	2663836672	689583168	1554310912	1963230592	2655226368	1807070848	2023858944	1098047360	1991113472	2024903040	1670723968	2484175360	1034906048	814090368	1384317696	848792576	825948608	1827595904	1275510272	1859513856	1186447616	1690841472	2177552128	1974456192	2116643584
		glucuronate	15443	LC/MS Polar	100000257	3233.3	193.035	207300-70-7	444791	C00191	HMDB00127	92922832	81903152	361172448	92852184	93293496	112695760	70149248	125913120	81689816	128397568	102704000	62966048	55251252	114159048	72629936	89333728	64951944	167921872	72988192	144481920	68271120	95835016	330624320	77080640	183882432	98831824	76837352	128873688	81889776	64025432	86104368	52821736	339924128	43387608	89761560	100299424	99596288	109231640
		N-acetylglucosamine/N-acetylgalactosamine	46539	LC/MS Pos Early	100006435	715	222.097	-	-	-	-	64986072	39997424	69978760	56534928	32657466	24531572	34431888	42207920	12738849	55355128	45834544	36988976	33319928	52750452	21694694	43717300	36504628	77931224	41067928	48828188	43002320	45347724	58975036	50437732	63558180	21201438	30510966	28293120	15857847	26578572	35666228	28571776	59593840	19128728	35294328	59074880	53817492	46479792
		N-acetylglucosaminylasparagine	48149	LC/MS Pos Early	1215	1212	336.14	2776-93-4	123826	C04540	HMDB00489	3874660	7738246	14724075	7.51777e+06	6942579	2603940	5440289	10285097	1.73446e+06	12637629	12513088	5377398	4258836	8379639	3606990	7068101	4708590	14311539	6279789	8.33061e+06	3760124	7.62431e+06	12166520	6456511	10877928	2289425	5597727	6784557	1855549	5662197	7.75128e+06	3170485	8789035	2262645	5363894	11243657	5167632	8927379
		N-acetylneuraminate	32377	LC/MS Pos Early	1162	660	310.113	131-48-6	439197	C00270	HMDB00230	33495446	34983460	61887360	42234536	27790182	22434056	30330784	42527552	16790956	64077708	60313732	32412504	30704568	61637392	22703960	31221852	38006508	55850256	52732856	41273380	24053316	30497632	50742592	37879880	48498456	22352080	30585862	35849896	18747108	35964744	50602272	27794176	64159244	21509928	38101908	45182960	44705940	42655472
	Disaccharides and Oligosaccharides	3-sialyllactose	40424	LC/MS Neg	100003408	730	632.204	35890-38-1	123914	-	HMDB00825	2494326	2191449	7.85176e+06	2443974	2954767	1219582	2087216	2691855	700092	3712437	4657589	2637052	1842599	4233511	1121990	2593705	3302369	5152245	2566484	3808155	2409962	1845907	7584720	1792969	3317009	1598403	1737699	1979014	865727	1919727	3204849	1057737	3947888	1027511	1634466	3903589	3484882	3698522
		lactose	567	LC/MS Polar	393	3500	387.114	5965-66-2	84571	C00243	HMDB00186	7766017	2718967	5.49676e+06	6736825	5.60708e+06	4.4032e+06	6865121	7.65173e+06	843200	3.38607e+06	7343656	3.73622e+06	1514640	21319550	1.91677e+06	3211549	6.15741e+06	5668439	4.39893e+06	6635829	7199404	2.23779e+06	6.72066e+06	3.76236e+06	9696590	2.12485e+06	4.03458e+06	5.81853e+06	1.77143e+06	2.80705e+06	3.38022e+06	4.11364e+06	3.7989e+06	4.32701e+06	2.72836e+06	8530162	6.47713e+06	4.69219e+06
		Lewis X trisaccharide	39368	LC/MS Neg	100002933	815	528.193	71208-06-5	4571095	-	HMDB06568	966198	418435	ND	ND	ND	ND	1.02975e+06	ND	ND	ND	ND	448720	ND	ND	ND	ND	ND	296236	ND	229326	278382	154571	ND	ND	ND	ND	658600	ND	ND	ND	ND	593701	ND	ND	ND	ND	ND	ND
		raffinose	586	LC/MS Neg	879	978	503.162	17629-30-0	10542	C00492	HMDB03213	2031004	658302	912175	202560	750806	102999	407031	66124	59412	ND	1288238	486303	88605	1707932	622836	487887	1645887	1451828	208614	676172	982076	323409	704208	ND	209150	277336	88684	124025	285637	1106396	346258	374044	1101766	84136	168151	548872	352252	1602036
		sucrose	1519	LC/MS Neg	935	865	341.109	57-50-1	5988	C00089	HMDB00258	100907536	10222158	37844968	7784554	45019220	9839715	9707850	27310390	11110733	2147549	69779712	39353552	2158131	216428544	3820368	31722988	82763232	25879110	317117	28192956	62955232	23834440	84518464	8051804	22248828	8711320	7001320	7126340	13721191	2870347	29211692	9422542	102774480	6588854	13291621	84475728	23147020	105206880
	Fructose, Mannose and Galactose Metabolism	galactonate	27719	LC/MS Polar	100001026	3085	195.051	299-28-5	128869	C00880	HMDB00565	709079936	168822576	452858528	107890768	96932208	158045248	311515328	395991584	64384520	500560800	577163328	104690752	50891512	390124960	276248000	1927658112	138771296	269852192	208154160	151903632	154427456	218182048	481460032	73276072	380958400	59340844	269780768	359656288	189682384	265644224	417348832	104937720	197438160	89097408	189506256	1109362048	121675200	165997888
		mannitol/sorbitol	46142	LC/MS Polar	100001740	2260	181.072	-	5780	C01507	HMDB00247	51532332	675907712	51352812	39463456	51096084	23286396	19069716	467227968	82083120	278769344	236741456	148375584	33641264	110958928	442248352	40670392	103414008	122134272	7408330	57862196	72079360	239704256	71464496	34147124	103396576	60949092	27021694	182920320	224199296	74172400	114721208	49512888	249312192	57730980	159360592	82222944	77245192	187814336
		mannose	48153	LC/MS Polar	803	2200	225.062	3458-28-4	18950	C00159	HMDB00169	223226	292104	327341	1337781	587719	ND	ND	384863	ND	ND	606998	ND	ND	ND	ND	ND	308191	ND	ND	ND	ND	ND	ND	1.24825e+06	911887	158509	ND	115218	ND	ND	145704	143039	411985	ND	ND	440165	84362.6	ND
	Glycolysis, Gluconeogenesis, and Pyruvate Metabolism	1,5-anhydroglucitol (1,5-AG)	20675	LC/MS Neg	100000580	802	163.061	154-58-5	64960	C07326	HMDB02712	5882015	11140986	425355	1442972	1963817	2768532	9448457	5388489	706030	10685444	9881412	5029982	4873637	4110627	3306965	3111418	4102173	9159334	ND	3776399	4646215	13976612	2578920	1606372	404937	1202874	5843074	5416283	ND	4490905	6246260	4300308	12047333	2928119	2172429	8260617	12239018	7849284
		3-phosphoglycerate	1414	LC/MS Pos Early	132	590	187	80731-10-8	724	C00597	HMDB00807	277189	226894	919810	171784	512218	225208	143807	347983	ND	1142716	360128	1.03917e+06	442433	1694397	200762	1564514	47845	753952	772000	398103	467136	401451	1083022	135532	957356	262302	281829	477131	61819	563783	197552	175243	1127433	657947	230708	436922	119894	558069
		glucose	48152	LC/MS Polar	572	2342	225.062	50-99-7	79025	C00031	HMDB00122	12384855	9248287	15589579	13308749	8962186	5711013	9392049	8981330	2811291	12293856	19623922	12471301	9732997	12350493	6788009	9661209	9176289	22131664	ND	9131893	9307602	11717700	15194252	10177164	14750152	7.68355e+06	9163550	6.3954e+06	2903459	6.3832e+06	12739781	8627047	11944174	6169757	9007167	29672998	9174681	16475396
		glycerate	1572	LC/MS Polar	1052	2070.4	105.019	600-19-1	752	C00258	HMDB00139	10568356	17074312	7.20101e+06	14390732	5548598	7273088	15153414	74922048	8880853	16740352	20825942	5852616	14505068	14048654	11471771	20812600	11809946	23385562	16206094	32318640	4978382	18551184	12737156	37924084	26105248	8279913	13128617	78116552	15698081	7.66276e+06	17582940	11703200	85372416	15103868	77928168	24475646	19360648	16149752
		lactate	527	LC/MS Polar	482	1468.8	89.0244	79-33-4	612	C00186	HMDB00190	20066028	17454990	14143113	25189542	9019034	10806588	17025272	23412232	4873336	23583428	22599072	14547048	17208348	80683032	10298274	17275370	16311534	36372748	32655590	23869884	10455035	19018606	14824373	42757268	22520934	8414796	10177624	14187257	11464639	23205808	16483947	9137524	23152290	9326493	18941094	125903536	34994132	22723016
		pyruvate	48990	LC/MS Polar	823	1083	87.0088	127-17-3	1060	C00022	HMDB00243	850012	ND	2.11895e+06	ND	885280	380855	ND	ND	ND	ND	2.59248e+06	2.58209e+06	2.05865e+06	3196984	ND	1.34412e+06	ND	8432311	1.80794e+06	ND	1.89014e+06	ND	ND	ND	ND	510302	ND	ND	ND	1.70137e+06	ND	ND	1.3782e+06	ND	ND	2.49393e+06	3.45544e+06	5396417
	Pentose Metabolism	arabinose	575	LC/MS Polar	828	1804.5	195.051	28697-53-2	66308	C00216	HMDB00646	3.51803e+06	3511278	9092421	8513273	1223868	1813555	5132244	6.17936e+06	1.00896e+06	25414048	15838660	2.7788e+06	2.77511e+06	3.7998e+06	3.65939e+06	4556942	3.76052e+06	17269250	7.14547e+06	7611682	636475	6109433	4.56936e+06	7122709	9436571	1.67813e+06	4125424	4.02651e+06	1234443	1.77082e+06	10346166	3.94276e+06	5.62277e+06	1.16526e+06	6489486	11039070	9425658	11220925
		arabitol/xylitol	48885	LC/MS Polar	100006430	1932.4	151.061	-	-	-	-	42366972	57426832	119150776	65318760	45340168	25463958	40629124	70765888	18332122	201498896	146820432	45207472	33497494	105484280	27736744	39690376	46710228	185093216	40890336	53945356	39051980	75691440	106431472	54448712	80869416	35057000	38413204	55570864	22602596	38249120	85066720	23749940	83970744	37637540	55487376	59330992	55090004	133246984
		arabonate/xylonate	48255	LC/MS Polar	100006115	2664.6	165.04	-	-	-	-	279594432	351097472	633329920	435868608	230034064	115726000	199187184	662460992	148071232	923030272	331755264	290349376	226499200	431905952	205616272	214998480	300797248	449275936	278116864	386389792	261240864	385251744	535635776	313428832	538648832	128403776	203352480	467789120	135060704	227073056	470296384	255139296	508620608	125773648	330082272	445206880	433883520	475858976
		fucose	15587	LC/MS Pos Early	918	750	164.092	2438-80-4	19466	C01018	HMDB00174	10303071	9091907	8127847	6985421	7842503	7676527	7474577	9046353	3.36264e+06	10049561	11352170	9478530	10891411	11317055	3548362	14472586	6889853	17262510	8338002	12245585	6153175	8066238	5292101	6.90693e+06	12086795	6.51869e+06	6558182	6204486	4.00445e+06	6.60767e+06	12328300	7647281	8382643	5510652	9812732	14924908	11973876	15520691
		ribitol	15772	LC/MS Polar	100000406	1789.6	151.061	488-81-3	6912	C00474	HMDB00508	5.4686e+06	3499449	6.89138e+06	6665067	5037624	2.40468e+06	3.44287e+06	3.74925e+06	1.03796e+06	10050259	8759520	6846966	4.56028e+06	7.22165e+06	3809855	3.95188e+06	ND	6470424	3.49554e+06	2.73354e+06	6.52061e+06	4.0003e+06	6.78893e+06	6.18911e+06	10818156	3.29911e+06	3.03693e+06	4237652	1.16086e+06	4.01005e+06	6.56024e+06	ND	6472123	2592246	ND	7.30495e+06	6786535	8198872
		ribonate	27731	LC/MS Polar	100001007	2425	165.04	5336-08-03	5460677	C01685	HMDB00867	154129472	92293216	136829520	231063840	131029640	43666732	72271560	333979040	135909488	267664336	565388160	94805720	73849440	249843472	90833592	176731552	118247176	191653136	95053352	182520928	151318688	267774176	578692864	161269344	501323904	52857196	183767376	434917408	118749992	134722304	578465216	199367312	668059136	132651536	359447328	359057184	244451184	384461856
		xylose	15581	LC/MS Polar	826	1727	195.051	609-06-3	135191	C00181	HMDB00098	2.9788e+06	2.32564e+06	12136112	15243387	970210	1618974	4.5039e+06	15026602	4.6674e+06	3.35124e+06	7809084	1.34988e+06	2437666	3.43272e+06	2.57619e+06	2.27975e+06	876124	11925394	3.88991e+06	4795447	473654	2.36542e+06	11961092	14234962	10652224	1.23803e+06	2.80067e+06	4143052	844798	657228	4.79648e+06	3.16963e+06	15260199	1.17914e+06	5812655	9058611	7906571	4761307
Cofactors and Vitamins	Ascorbate and Aldarate Metabolism	ascorbate (Vitamin C)	32354	LC/MS Pos Early	233	770	177.039	134-03-2	-	C00072	HMDB00044	ND	ND	154527	ND	ND	ND	335969856	ND	ND	ND	ND	ND	ND	ND	ND	457009248	99694488	ND	ND	ND	ND	ND	ND	ND	ND	ND	236053024	ND	ND	ND	ND	ND	ND	67380512	ND	80529888	9724303	ND
		dehydroascorbate	34302	LC/MS Neg	301	739.6	173.009	490-83-5	835	C05422	HMDB01264	ND	ND	ND	334240	214100	246584	72811736	430906	194256	ND	ND	ND	78250	ND	327976	6092525	710530	ND	ND	ND	ND	ND	ND	530134	759835	324909	80347872	1161988	ND	ND	ND	ND	453625	237865	141235	5936625	15660914	ND
		gulonate*	46957	LC/MS Polar	100001586	2750	195.051	20246-53-1	9794176	-	HMDB03290	227024544	259286736	271104448	326652288	236800176	82832592	203769008	417188736	111683352	278382400	167363392	277609408	205224672	299714944	163985488	189124000	236929744	17701426	416561376	252457952	196824240	169278240	204840112	217719472	392889760	100476584	158992800	329483200	154291920	190641472	154920048	194900784	340398240	135109536	272141472	268602368	403757856	40567472
		oxalate (ethanedioate)	20694	LC/MS Neg	100000841	603	88.988	144-62-7	971	C00209	HMDB02329	3935052	1971908	2617638	2684110	4722983	6190373	9229805	3913645	4922949	1253480	ND	6755004	6007332	21421992	4415774	9245796	1622765	423955	25395130	3472044	4156060	623715	1844031	2297993	16307166	7095460	7326619	5086838	4168421	1234318	5320531	3653693	48440848	4236775	11320028	3670602	6196515	2138275
		threonate	27738	LC/MS Polar	100001022	2384	135.03	70753-61-6	151152	C01620	HMDB00943	39247200	46549108	56949480	50066456	29298882	17596092	67289936	78880480	16511889	129818960	59028756	45386900	25959310	63497564	19748020	39979672	66152432	ND	29672432	44083840	38317244	54488304	49557568	94143440	69887896	20838766	184819744	39867052	27257946	40894812	56738856	ND	69345776	34714512	21416570	52822952	39077952	46698092
	Folate Metabolism	5-methyltetrahydrofolate (5MeTHF)	18330	LC/MS Neg	1244	1820	458.179	68703-91-3;68792-52-9	146	C00440	HMDB01396	ND	ND	ND	ND	ND	ND	ND	ND	ND	ND	ND	ND	ND	ND	ND	233121	81031	ND	ND	ND	ND	ND	ND	ND	ND	ND	39093	ND	ND	ND	ND	ND	ND	2149382	ND	165482	ND	ND
		folate	1826	LC/MS Neg	328	1467	440.132	59-30-3	6037	C00504	HMDB00121	ND	ND	ND	ND	ND	ND	ND	ND	ND	ND	ND	ND	ND	ND	ND	ND	ND	ND	ND	ND	ND	ND	ND	ND	ND	ND	ND	ND	ND	ND	ND	ND	ND	ND	ND	ND	ND	ND
	Hemoglobin and Porphyrin Metabolism	5-aminolevulinate	2290	LC/MS Pos Early	1306	2049	132.066	5451-09-02	137	C00430	HMDB01149	5826152	7406385	9003715	6.26727e+06	4108848	4254024	5702632	5164023	3289691	10122378	12246829	3996609	5764744	7378315	3.91739e+06	6400983	3.73135e+06	14260107	4234508	4605808	6857476	7250630	10940567	6.30349e+06	4955345	4311760	5783055	3723480	4.06008e+06	6062573	5520833	3932106	6246536	5922030	5282576	6.81994e+06	2815915	10566243
		L-urobilin	40173	LC/MS Pos Late	100002568	901	595.349	34217-90-8	5280818	C05793	HMDB04159	941007	4.0637e+06	1620635	14203936	4504296	ND	ND	1348492	236169	ND	954562	27698160	ND	ND	ND	ND	ND	ND	ND	3168468	3217302	224610	275959	8.26711e+06	1371031	ND	314918	127923	230982	ND	1420147	4820891	793286	ND	ND	ND	ND	ND
	Nicotinate and Nicotinamide Metabolism	1-methylnicotinamide	27665	LC/MS Pos Early	55	1940	137.071	1005-24-9	10129985	C02918	HMDB00699	251005984	411298880	7528123392	437239104	434311136	203673584	409460000	267756304	313535040	370840608	554226112	280885440	533230208	309692096	266911696	302225856	366293024	1032784064	385100512	420309088	296138176	310737952	5273907712	434378016	335032256	281190240	518031648	238562656	428817728	246768768	593190528	212923360	337477536	321431584	474744352	310748544	420783552	527049216
		N1-Methyl-2-pyridone-5-carboxamide	40469	LC/MS Pos Early	100001468	1250	153.066	701-44-0	69698	C05842	HMDB04193	220794336	213923104	7320042496	544328512	410205440	217237568	442343456	615229888	248290368	372506688	523591392	223021056	452702112	616769536	189336576	415306464	427855680	497088160	502597632	592466752	256629456	337183744	5827770880	560812480	474783968	235556112	562431360	357392960	479328544	168965552	387212544	156817856	489197664	356202368	319174368	404236800	388922944	190259184
		N1-Methyl-4-pyridone-3-carboxamide	57584	LC/MS Pos Early	100001469	1260	153.066	769-49-3	440810	C05843	HMDB04194	142623584	129871392	4576325632	322007680	245101440	142191808	281702272	310000832	153785776	203989024	292691264	136359088	253574112	330684512	122495320	256573440	239382832	217989216	280498368	276158400	151162496	185750224	4102757120	308135072	280186496	136175952	325945216	217205600	281889280	118971896	225968544	89118560	319626816	213070528	180765024	253744016	239271360	115040184
		nicotinamide	594	LC/MS Pos Early	432	1942	123.055	98-92-0	936	C00153	HMDB01406	10791493	13715936	67317984	12237145	17435000	7915111	13039041	9092538	4916841	12255438	14175140	8811904	6714500	17576876	6290299	4246847	5333688	15597851	7002242	15991963	11922928	8394800	33558376	10111409	11965032	6.58108e+06	14424330	10998317	6556376	9407684	13047088	7.37422e+06	9514465	6.85161e+06	8097514	9372653	4732800	9224612
		nicotinamide N-oxide	39582	LC/MS Pos Early	100002763	877	139.05	1986-81-8	72661	-	HMDB02730	914754	1982910	106411544	8049433	4517008	2402478	6472022	2193297	530630	2989219	6910989	1.71047e+06	1.66054e+06	4997974	1.02006e+06	8918423	3354704	9505472	912780	932067	1.65379e+06	1.97711e+06	52004808	11736627	1616290	5954646	6.85211e+06	2515438	952534	1507152	3.33508e+06	1097095	6323509	2815045	2518034	11343450	3912805	4721901
		nicotinamide ribonucleotide (NMN)	22152	LC/MS Pos Early	1312	766	335.064	1094-61-7	14180	C00455	HMDB00229	139271	181061	2556946	183652	118424	536184	153232	339257	ND	641379	308456	ND	185293	260698	78820	165415	ND	ND	278698	ND	95922	213019	1410871	ND	215470	ND	132831	233431	86356	271359	ND	ND	296567	126182	158724	101607	129877	87439
		nicotinamide riboside	33013	LC/MS Pos Early	100001310	2040	255.098	1341-23-7	439924	C03150	HMDB00855	4949632	6140819	21492340	4798298	6422617	4350968	2745538	4236787	3138185	16002322	8893389	5015699	4606353	3297310	5095612	4573428	5.64716e+06	10589013	5947324	4631572	4523652	5406312	12654950	5633119	7.08817e+06	3047819	1742043	4587067	3425625	4272780	10056967	3296108	3135642	2422835	8039801	4098885	8500039	15213435
		nicotinate	1504	LC/MS Neg	567	1180	122.025	59-67-6	938	C00253	HMDB01488	209778	142502	142070832	313842	ND	ND	186501	200885	ND	ND	424306	191786	ND	271258	ND	198393	ND	195777	490356	797632	312388	ND	19745066	616398	498284	370412	291749	172771	357751	ND	247037	ND	238869	ND	ND	609967	ND	354276
		nicotinate ribonucleoside	33471	LC/MS Pos Early	100001316	1536	256.082	2625-49-2	161234	C05841	HMDB06809	1995785	1.90749e+06	121908464	1099012	1.89855e+06	661431	1958148	719958	500203	2184481	1574020	2560490	1229445	1418894	260926	935755	1698287	5095408	2099901	1.4427e+06	2.92977e+06	1252546	65742260	1207343	1311429	744443	1346799	773009	1179744	1132044	954280	578084	1179171	568678	377037	970752	785703	4624850
		nicotinurate	35121	LC/MS Neg	100001455	1467	179.046	583-08-4	68499	C05380	HMDB03269	ND	ND	6181242368	ND	ND	ND	ND	ND	ND	ND	ND	ND	ND	ND	ND	ND	ND	ND	ND	ND	ND	ND	2476693248	ND	ND	ND	ND	ND	ND	ND	ND	ND	ND	ND	ND	ND	ND	ND
		quinolinate	1899	LC/MS Pos Early	182	845	168.029	89-00-9	1066	C03722	HMDB00232	19099584	13309457	38328832	17791576	14687996	7278284	16573268	29748328	6806129	24064124	26064620	10390282	17082972	29771818	10102638	24647420	14486075	20633134	26226858	20571578	18593112	13835785	22435562	20619024	22231986	10558796	19542532	26710328	7924105	13059338	17398112	7651502	27177812	11408653	13801290	27197106	13689956	13828075
		trigonelline (N'-methylnicotinate)	32401	LC/MS Pos Early	100001092	1388	138.055	535-83-1	5570	C01004	HMDB00875	1857774080	647035520	4311985664	1392126336	1234894080	2866231296	1231204992	2225297408	1834891904	1557832320	3956836864	970316352	701607104	1842806784	2516767232	1673691520	720349312	2816265984	1352200320	1548739584	1898718336	1567536768	3831216128	1385236352	2621777664	266563504	1655125376	1778302208	1883085440	1129073536	2012052096	1264190592	1175920000	1203421696	2861363712	1193827968	1383652480	2056296576
	Pantothenate and CoA Metabolism	pantothenate	1508	LC/MS Neg	1024	1498.7	218.103	137-08-6	6613	C00864	HMDB00210	49295680	213260848	83349048	181271712	75622984	91530904	428893568	121778144	229548960	72140824	122446848	51366240	61985440	96944752	26985596	132977944	52452152	98644968	109399024	97435544	37353880	119866120	231986480	149114096	107078400	98009704	427856928	97791432	431557952	36702952	118516056	28305788	114772328	37758540	57450540	209902592	74549224	64982584
	Pterin Metabolism	isoxanthopterin	27732	LC/MS Pos Early	100000749	1110	180.052	529-69-1	10729	C03975	HMDB00704	592671	281491	2005865	921068	750748	525596	641302	868260	78447	ND	423625	322974	ND	544798	793156	ND	323192	491664	1190412	829519	372122	ND	138474	460264	1174285	481044	879219	1027540	55682	159843	522477	189601	660994	ND	896955	ND	726529	1052490
		neopterin	35131	LC/MS Neg	100001474	860	252.074	2009-64-5	4455	C05926	HMDB00845	1271128	851308	1513834	677999	493672	349761	400839	1442034	310703	1.61739e+06	1288100	512152	793421	1338505	420170	521094	530059	1598724	1001376	585528	946810	926629	621234	637761	600465	355104	442931	1306212	316027	737605	764358	271522	1328370	377306	460812	795332	574674	927709
		pterin	43023	LC/MS Pos Early	100004216	1805	164.057	22363-60-4	73000	C00715	HMDB00802	1.66729e+06	1.00402e+06	1625853	1920852	817892	574583	1405771	2997643	282906	690897	1141970	1131874	659835	771661	763102	759140	683709	2669088	1267115	1102360	1090264	351510	1010062	1574558	1070389	720847	1.67591e+06	1218603	285833	599346	902372	589619	721925	539921	1215591	1123657	1048693	2.09131e+06
		sepiapterin	48139	LC/MS Neg	100005969	2162	236.079	17094-01-8	65253	C00835	HMDB00238	702452	1122595	2402165	717640	342323	293573	152343	596579	227940	1.43503e+06	1283412	719836	1106918	692057	477436	568100	ND	2662079	ND	247722	229452	869348	1018800	294069	919866	558769	156303	602058	339932	732794	772615	96871	440088	309191	285193	555359	ND	2967759
		xanthopterin	54728	LC/MS Pos Early	100006338	1400	180.052	-	8397	-	-	1643292	1775866	5891883	2257763	641373	591614	510314	689105	150571	1548318	1017742	1337390	419868	1147445	976882	455745	575147	1422981	2091762	1533328	985071	819183	756147	1249695	436374	642612	625357	311003	76248	1314566	943083	839831	1842680	271903	1325753	943507	1182783	1064608
	Riboflavin Metabolism	riboflavin (Vitamin B2)	1827	LC/MS Pos Early	500	2292	377.146	83-88-5	493570	C00255	HMDB00244	ND	1514846	7724979	3633727	4427479	2563314	13403766	7.74697e+06	1981315	3040518	1241314	1803690	388304	2405736	935724	3762634	2664990	1177483	4444800	14053524	ND	568605	1427325	2819988	6130860	797957	20721336	4835559	8522109	1965159	1366121	986259	2152403	1961928	3505768	4428705	2.42405e+06	863953
	Tetrahydrobiopterin Metabolism	biopterin	12358	LC/MS Neg	1548	1398	236.079	22150-76-1	445040	C06313	HMDB00468	2311855	2211649	4683560	1552706	1060234	1347337	490075	305213	337558	5005370	3721549	1668712	2115260	1686827	818978	1327596	432870	6446937	4.06361e+06	945817	1606060	2367453	3259100	1362068	598451	1651059	525988	771705	247973	2581429	2249565	591548	1055129	906470	739026	1624807	355928	2809913
		dihydrobiopterin	35129	LC/MS Neg	100001506	1552.3	194.068	6779-87-9	1879	C00268	HMDB00038	ND	52679	ND	978699	ND	ND	620642	485613	ND	890842	ND	ND	68842	ND	191280	301845	408282	569856	1178777	312143	ND	ND	ND	1002873	ND	ND	450604	ND	ND	327172	ND	186521	59777	155031	236854	707180	1140099	378214
	Thiamine Metabolism	thiamin (Vitamin B1)	5341	LC/MS Pos Early	873	3050	265.112	59-43-8	1130	C00378	HMDB00235	2356409	4527177	7288882	10693961	25052676	3470704	19253800	17466728	17826436	13624149	23376624	2582683	2678690	12230482	4045094	15366158	9660467	34808100	5199354	14439284	3697622	3.44475e+06	11716878	8086844	17149466	3071365	18045326	7.93357e+06	45067604	9952406	13561547	1.52745e+06	5412209	4878713	3842608	19125860	8459593	33400372
	Tocopherol Metabolism	alpha-CEHC	48188	LC/MS Neg	100002206	4045	277.145	4072-32-6	9943542	-	HMDB01518	200786	ND	ND	166691	ND	ND	2065305	2275030	220543	586941	770414	ND	727270	679172	ND	769155	445421	372496	ND	ND	236296	197717	1084763	401622	116260	262334	1749272	1024861	ND	98751	186343	ND	830898	125493	ND	1275018	563932	407924
		alpha-CEHC glucuronide*	39346	LC/MS Neg	100003101	2616	453.177	477200-36-5	-	-	-	1358450	1387736	5451172	2553505	1.63222e+06	5003548	10474728	10285389	1626339	3478129	7759620	537118	2903436	6.70486e+06	681816	3494371	4706279	4354191	1917571	10210717	703314	1493649	5479098	2915715	2056092	5236037	12641488	5790010	783798	992908	3.44456e+06	202098	3256548	439382	567374	6222871	3885573	1055231
		alpha-CEHC sulfate	47666	LC/MS Neg	100005972	3090	357.101	-	-	-	-	2008389	3527992	15803383	6073259	2002710	20316842	6491823	18575698	1592139	3600146	14193095	903702	7382533	5699570	739784	7.78197e+06	14416806	6063322	3019494	10399057	1166416	2881845	15210836	6326582	2332520	16344461	8412476	9363543	698175	795668	7.3295e+06	223342	2209273	1070755	653092	13115730	8572954	2474208
		gamma-CEHC	44876	LC/MS Neg	100002094	3843	263.129	178167-75-4	133098	-	HMDB01931	404931	107754	359343	311482	233440	615450	611526	1027582	362801	471623	1381572	499643	587607	1061376	103778	309436	209215	2418042	716221	572999	157271	241666	344897	368432	401630	504940	613169	543678	138907	158988	157313	158466	974524	110452	165839	574112	343398	577472
		gamma-CEHC glucuronide*	42381	LC/MS Neg	100004243	2500	439.161	-	-	-	-	9717838	4347173	11007602	6237188	6087984	15067519	9653799	15436974	5799083	9676376	35318768	8060577	16809284	26702164	3549637	7478118	10442528	64123336	19783660	20094232	3890837	6.30893e+06	12385255	5.28202e+06	3934561	9986397	14995810	8651294	3.25881e+06	4275563	5700616	3073364	20771068	2820295	3738941	13879156	12987400	15795114
	Vitamin B6 Metabolism	pyridoxal	1651	LC/MS Pos Early	491	2343	168.066	65-22-5	1050	C00250	HMDB01545	2177763	3776059	1575980	16755082	3079442	5701704	13630680	4682734	3443016	3227091	4979549	3065469	33386248	3836405	1708033	32218224	11980645	6228820	3637412	4120698	2504982	2783972	1122079	18427204	1967704	5735105	14317458	2675635	11511950	1692997	6191495	2721459	4101875	45862748	1475943	52816912	12626525	7358815
		pyridoxamine	2150	LC/MS Pos Early	568	2975	169.097	58052-48-5	1052	C00534	HMDB01431	587547	515204	1129252	1377891	623576	447882	674986	634015	369464	1144856	1333453	561404	1408778	849911	256063	1707872	794366	1423418	818530	631122	517575	747563	879921	1254218	1226567	536446	753656	522006	1067065	451981	922297	303358	590036	2245677	476501	2746079	1267358	1307577
		pyridoxate	31555	LC/MS Neg	100001121	2185	182.046	82-82-6	6723	C00847	HMDB00017	179736208	311381376	745628160	855584960	393949344	274081312	910730240	929351744	393372864	648217856	803702912	264564960	2417446144	611800064	143048736	1583183232	786911680	346063168	253745536	643268800	98098976	389236160	758876864	669983488	555425856	211769632	1094005888	339047456	1010539328	231116928	571606208	115613920	484916064	3464594688	253544048	1036175168	1047967872	347349824
Energy	Oxidative Phosphorylation	phosphate	42109	LC/MS Pos Early	461	576	98.9842	7664-38-2	1061	C00009	HMDB01429	330583424	438436736	1065367872	239875728	290928832	143083936	307886400	530633344	121718528	954590784	559981888	420620384	297110976	475698240	193867472	602553344	217898816	819531904	577580352	265388704	296446688	494647008	861189184	160494688	407867744	233611536	386587968	432607520	182175728	423375200	312693408	140211456	496541696	294661920	286579872	570373504	216415696	588427904
	TCA Cycle	2-methylcitrate	37483	LC/MS Pos Early	90	1370	224.077	6061-96-7	439681	C02225	HMDB00379	7470108	9393506	8486199	9535662	6466294	3933727	7.70361e+06	8180492	3211314	14163271	15705798	10584762	7412807	12491393	6156632	7652462	6158179	11824984	6678639	10036808	7497288	7341410	5625381	7.5335e+06	10034078	3811135	8434573	7576089	4954017	10523881	10586689	7518459	8789639	7246848	5573782	7.77604e+06	4981122	10482176
		aconitate [cis or trans]	46173	LC/MS Neg	100001359	580	173.009	-	-	C00417	HMDB00072	449142784	498176960	962952640	804839616	439847712	497507616	540828864	572951680	227743456	803149312	899291456	508541920	396211648	905506112	345434432	761860800	716867840	1230435200	769335424	836259264	310608896	503143904	964462464	779683008	572052608	415611840	443157376	515383616	277869856	406220800	681128960	562131264	1028432128	227710080	613461888	1154539264	986847488	1012971712
		alpha-ketoglutarate	528	LC/MS Polar	93	2700	145.014	305-72-6;328-50-7;22202-68-2	51	C00026	HMDB00208	40592352	30385394	105378424	309273856	42108644	2825596	9547168	3240238	2152930	28292176	59782232	158356352	56792960	97397840	4.42816e+06	13270169	16984756	287296256	61141612	3.58626e+06	39900160	40018436	11510439	17065572	8319607	4.0876e+06	10587608	6091694	2.96265e+06	19090708	11131413	6.50453e+06	9299101	11554063	3.2213e+06	42700624	8862241	140646528
		citraconate/glutaconate	47076	LC/MS Polar	100006438	2600	129.019	-	-	-	-	99294512	21321790	188974896	67114264	112662608	289664800	34054436	234882240	100952024	125783008	153523184	24098746	9297796	33583056	59923316	30086958	8783350	127763592	43937444	123415056	23920652	76660728	154335840	48284508	183273088	7.49924e+06	48945668	85300240	128561720	17062240	85318336	20968816	41517148	15807306	96510432	47952704	22174218	106547008
		citrate	1564	LC/MS Neg	1124	582	191.02	77-92-9	311	C00158	HMDB00094	1245858432	2295920640	1961760000	2266455296	1755405696	1119829760	1025616384	2311955200	869628736	2085569152	1780066688	3595275520	2185941248	3303765248	1481561728	1166215552	1752802816	1846910208	1837183232	1422270208	920791232	2546892288	2126059776	1845986816	1905062144	1235169152	1180944896	1821258240	1109470464	1068062208	2093754112	2277242112	3980990976	1311778688	2491266560	1710201472	2109517312	1397742208
		fumarate	1643	LC/MS Polar	330	3084	115.004	100-17-8	444972	C00122	HMDB00134	1.88402e+06	3084427	6689516	8328594	2.48912e+06	1.38449e+06	1.6398e+06	4908347	943133	3501282	5.22969e+06	4429604	2.85805e+06	6941491	1.94753e+06	2.38017e+06	2.54585e+06	2894541	1.61021e+06	2.60015e+06	1.49033e+06	2.61108e+06	2844980	7107389	5318451	1.02817e+06	1.4092e+06	7585457	2.73672e+06	1.00024e+06	4165379	3.27664e+06	6883685	2417270	5.83003e+06	7093661	4498277	2.46071e+06
		isocitrate	12110	LC/MS Pos Early	1206	773	210.061	20226-99-7	1198	C00311	HMDB00193	41047208	41999488	86885104	28090432	52764008	60799800	115012368	52557384	17718046	70322624	70424616	62198552	31450508	112086536	31638594	127076032	70651704	73298568	32332998	59015260	32819788	39902680	77587504	23350572	74675992	44534720	113985576	43357288	20434148	32826092	61315064	40304952	77923896	46620844	41149008	89267616	64291112	65790644
		isocitric lactone	54724	LC/MS Polar	100009239	2970	173.009	4702-32-3	98259	-	-	37602724	17432176	63999844	23622468	50692520	31423040	16261483	78217568	1.90351e+06	150984032	112871616	36744696	8657362	242054848	6.07296e+06	30344014	16497050	116299256	8415113	33026794	28695240	29711658	73317104	11397559	187696944	7034694	44976784	33351730	2.50488e+06	11312738	61707220	7.28594e+06	61059796	13326779	14140743	41683860	17983100	112599224
		malate	1303	LC/MS Polar	409	3343.1	133.014	6915-15-7	525	C00149	HMDB00156	44599332	52135972	228325648	219985392	55619844	34011036	38262012	313441536	35580628	161732480	107818008	85354408	55185480	161523568	20974844	62008204	35865772	143946048	17349182	82440984	32750142	66724296	133429984	182511904	169490480	29322806	35104716	305302112	60662468	35592004	74781896	47401856	206799632	37073164	64231964	239735280	66458840	90077224
		mesaconate (methylfumarate)	18493	LC/MS Polar	100000446	3000	129.019	498-24-8	638129	C01732	HMDB00749	3.76657e+06	2.61021e+06	7512833	2671650	3.45837e+06	2.82849e+06	3.54731e+06	5071897	1.60624e+06	6911581	6808955	2.76808e+06	2.4489e+06	7.06708e+06	1.51063e+06	4160929	1.88638e+06	8125370	1.37128e+06	4947856	2.5608e+06	2.92777e+06	6522872	1.9272e+06	9689433	1.43e+06	3600909	3599276	2153469	1323951	5385529	1.50171e+06	4.08813e+06	2.27735e+06	2.0374e+06	4659921	2.9939e+06	6.02557e+06
		succinate	1437	LC/MS Polar	252	3149	117.019	110-15-6	1110	C00042	HMDB00254	89002616	153081152	125590016	239514912	99773752	61741752	91035352	241344336	122961248	177340496	90613480	104235952	125845536	207933056	87536368	120437952	94638496	189429392	181150576	130430976	78551960	186768176	140549504	417775872	237446160	63727388	102249992	339939072	148111136	84825376	105925360	147809872	206025776	117034552	168085392	172964592	105936248	90327856
		succinylcarnitine (C4-DC)	37058	LC/MS Pos Early	100001948	2291	262.129	256928-74-2	-	-	HMDB61717	63596388	44998464	56644188	55223680	53978912	34599008	38040932	31810162	19211522	121572568	80690280	77830112	39867344	34158736	30872902	47657432	53491136	60025896	35970996	42808896	60601812	43353676	61778064	45679604	68380808	40378068	27715698	38516868	26777670	64840512	68651104	47757024	24574396	26341008	29390868	42077028	57369648	55231888
		tricarballylate	15729	LC/MS Neg	2053	578	175.025	99-14-9	14925	C19806	HMDB31193	3574067	6541276	ND	515801	609192	21913542	888645	ND	1576972	120976176	670734	4874570	1010551	10967188	1112997	ND	1501313	ND	2912970	3822724	2.85291e+06	3225162	30151380	1515344	2308608	1465609	870251	1281815	2435106	24781818	1136173	13386758	26220254	ND	2240840	1.82738e+06	3.44616e+06	934555
Lipid	Carnitine Metabolism	carnitine	15500	LC/MS Pos Early	100000007	1978	162.112	461-05-2	10917	C00318	HMDB00062	837200064	519812000	118335856	957795328	415504256	258179728	2019233280	1385060992	146614704	267122688	1061324544	834543168	378377664	1486490752	862394496	1117383680	830545408	905075968	1574547328	1323901056	247103280	398582400	128644816	1236709376	865060672	256224832	2445081856	991121536	99849304	743512000	500885984	1510071168	1193934336	969557248	668361344	2083622528	429218464	306755040
		deoxycarnitine	36747	LC/MS Pos Early	100001662	2052	146.118	6249-56-5	134	C01181	HMDB01161	7230422	5584093	2196627	6992065	3.51256e+06	1623954	24718364	7305698	1778335	5838278	19796652	8248049	11097799	16070814	9148332	16678781	7088557	10024812	15041239	13846249	3030276	5448079	3222045	13397019	7.21817e+06	2147517	40950004	4.18959e+06	1630028	8617662	7977371	18559838	8613028	41326512	5929188	32533736	4014430	4194685
	Fatty Acid Metabolism (Acyl Glutamine)	heptanoylglutamine	54918	LC/MS Neg	100001745	3526	257.151	-	-	-	-	227460	408284	1901021	657160	310795	327089	89667	125317	94693	268553	334712	211967	186617	254475	41140	190295	120470	380643	284044	214329	155420	143644	342231	403472	142676	122812	119334	164402	138316	109865	305897	153552	188043	164183	69057	332350	127202	268917
		hexanoylglutamine	54907	LC/MS Neg	100001733	2780	243.135	-	-	-	-	21832396	25497520	211873936	49025096	33272416	28475206	12136013	9798330	6868516	22845478	22498084	16961648	17275002	16841856	4724631	14328341	13274772	31413144	20917350	22779988	17246512	13167538	39556084	21837508	14164128	15906362	16388746	12045692	10194661	9777564	18028794	13357316	13403523	14915310	12544147	27190558	15189148	22041364
		N-octanoylglutamine	54919	LC/MS Neg	100003941	4164	271.166	-	-	-	-	704160	873934	2838933	1090026	880745	734408	321652	240208	228453	648815	347594	379176	406828	488911	138652	240423	247129	1175298	678288	412566	615269	759308	603029	571358	353514	370030	375088	287416	340490	329382	279083	421673	469635	428756	305993	456062	231395	1220527
	Fatty Acid Metabolism (also BCAA Metabolism)	methylmalonate (MMA)	1496	LC/MS Polar	418	3078.4	117.019	516-05-2	487	C02170	HMDB00202	77528704	54198596	52513876	127408048	42559908	8842293	70838384	51626132	7.75771e+06	99556096	98809960	71616392	23584114	116470344	23483632	66811536	37062704	129200312	49930340	23196254	81759280	49532904	75915880	35164736	67043708	13531128	51454596	65377448	12842836	77598896	67343488	39297260	116005240	31877012	33569344	81409856	46388092	89846928
		propionylcarnitine (C3)	32452	LC/MS Pos Early	100001162	2590	218.139	17298-37-2	107738	C03017	HMDB00824	18965980	14604767	18166456	40801588	14028599	4448970	155812336	105244512	2666596	7786406	32723724	25130924	13036335	59524052	28698176	109725248	25827460	33572844	91338928	79964168	6136270	10463638	4836283	68719024	41583492	5702503	240126976	51328056	1591211	21469048	8675365	59674536	52991420	63344156	18994396	274459520	10343709	6527057
		propionylglycine	31932	LC/MS Neg	100001150	960	130.051	21709-90-0	98681	-	HMDB00783	ND	173834	ND	ND	ND	ND	182760	219478	ND	ND	ND	ND	281755	ND	ND	ND	ND	868389	ND	ND	ND	270661	ND	211899	ND	82326	ND	ND	154747	ND	ND	ND	287125	461233	ND	237777	ND	699838
	Fatty Acid Metabolism(Acyl Carnitine)	3,4-methyleneheptanoylcarnitine	52929	LC/MS Neg	100009234	4096	346.187	-	-	-	-	86866	ND	ND	182498	ND	ND	906672	759308	ND	51394	291940	101692	ND	254507	91041	171492	55998	112248	421511	184229	ND	ND	ND	168974	193144	ND	1907064	399636	ND	59087	40296	202769	236276	54181	61099	458509	36335	ND
		3-hydroxybutyrylcarnitine (1)	43264	LC/MS Pos Early	100003926	2400	248.149	-	53481617	-	HMDB13127	11099050	15203210	435362	16686141	15693527	4246314	13010704	19694836	2525289	5205557	16888268	8880502	4985736	14121846	8028715	13068182	10841695	9906553	11188555	17548220	4403365	8309369	548085	14957607	14268659	4278477	20569608	11044950	1603704	4734104	6.73339e+06	9317879	11160844	7.32222e+06	12096326	19287908	8076334	4796672
		3-hydroxybutyrylcarnitine (2)	52984	LC/MS Pos Early	100009271	2340	248.149	-	-	-	-	869438	978251	1.2008e+06	4329921	1.24307e+06	1.76547e+06	7.54133e+06	8023465	ND	378820	1272684	1722782	372082	2382419	1.0417e+06	4.44732e+06	1.62692e+06	1.59578e+06	2887170	3031082	ND	483635	116303	4839802	1.61926e+06	409422	20123524	2619102	176840	985886	686357	3.21919e+06	2588064	2.02402e+06	598270	15997582	776985	ND
		acetylcarnitine (C2)	32198	LC/MS Pos Early	100000802	2282	204.123	5080-50-2	1	C02571	HMDB00201	348818720	258983424	335327872	779423936	201412544	137605856	1398633216	942494656	55994492	142766624	847762432	406579808	200960608	1019405440	390248320	729042112	434729760	545478848	892876032	931287616	81420232	235844560	67815752	931029184	492208704	88282448	1935465856	586216512	50227560	271597376	319006880	568242240	912405888	619669312	329919360	1710629504	178074960	154373408
		adipoylcarnitine (C6-DC)	52988	LC/MS Pos Early	100006614	2558	290.16	-	-	-	-	42069232	43865736	48500200	73799440	30812966	31974968	24794192	45482056	10176433	71162768	41536520	33731328	17439604	50597432	14191409	35169824	61946144	35838040	29168992	59958232	31771680	25825892	20525340	57575632	41787384	20530712	32176684	30223552	19197012	30462136	23461908	31588860	29986246	10958510	23585488	93262768	48143712	28149676
		decanoylcarnitine (C10)	33941	LC/MS Pos Late	100001251	1130	316.248	1492-27-9	10245190	-	HMDB00651	1369990	2.9805e+06	13333582	5186584	1143917	1846854	2521697	2757060	ND	8187872	6953798	1482593	1142992	2.74739e+06	ND	ND	1254139	5.51193e+06	1667354	2785712	840366	1639581	4970902	3715818	3.14878e+06	921498	3629062	2447815	ND	1935454	3987541	1554854	2399167	769173	1993999	4539395	1891919	1.57054e+06
		hexanoylcarnitine (C6)	32328	LC/MS Pos Early	100000781	3308	260.186	6920-35-0	6426853	-	HMDB00705	2325633	3293910	7563802	3112125	1078214	2631944	2477250	2102020	1053671	2299738	3587144	2.75159e+06	1990314	2762879	1097201	2433266	2570350	4237800	3642243	3390849	1337153	2539034	3494075	2438592	2731828	2352155	4.06824e+06	2291684	1064880	1447811	2393725	2920696	2630659	1291493	2482221	4695055	2683160	2468058
		laurylcarnitine (C12)	34534	LC/MS Pos Late	100001392	1235	344.28	25518-54-1	10427569	-	HMDB02250	722957	709311	7344058	3714629	1564737	1424725	522894	715814	472615	2167371	1556730	1224564	1.02039e+06	2245374	314609	386860	792798	939042	771748	319160	627943	581084	3259822	2612951	2368811	910969	695115	1266044	785783	903720	1525621	874108	1210761	691766	1638193	1356444	825976	458045
		myristoleoylcarnitine (C14:1)*	48182	LC/MS Pos Late	100006051	1316	370.295	889848-55-9	-	-	-	441312	628476	11970494	3034179	1199468	574756	316353	558471	303120	2306848	991535	875014	857970	950459	362444	218548	516583	927675	1363631	322938	300849	346420	1964141	2222666	2133314	430657	1152314	1364636	629832	722852	1085059	374825	858302	399828	2228525	717546	643609	255538
		octanoylcarnitine (C8)	33936	LC/MS Pos Late	100001247	950	288.217	3671-77-0	123701	C02838	HMDB00791	9099611	13297334	14505581	17696400	5.87469e+06	5435909	28001866	12812687	1770826	9843332	15386817	8.01224e+06	6.46796e+06	17632376	5657327	10132460	7.19494e+06	10478966	18611372	20105208	3333620	10338467	7205080	13529314	10340149	3931271	55501008	13542197	2351834	5789197	10047429	11604870	18481452	8287988	12526974	27359906	6436317	3621716
		pimeloylcarnitine/3-methyladipoylcarnitine (C7-DC)	53224	LC/MS Pos Early	100009407	2773	304.175	-	-	-	-	25573614	31057400	11515279	19078202	18149940	14441430	19475428	27601702	13948449	72684816	63443404	27570764	25488280	21480514	12242859	17419758	18921268	48067116	14081042	29242708	22498882	25184064	27733614	16557881	35579292	12613829	27015694	19026994	16969382	29848538	32626576	15832617	18403416	7897941	13605654	38668496	13840458	26448128
		suberoylcarnitine (C8-DC)	52990	LC/MS Pos Early	100006627	2964	318.191	-	-	-	-	24617828	32259860	111999488	24435542	23955506	44939988	13427977	29292482	9819105	31861542	39721132	25907714	12058364	27153700	7173523	16565748	26950530	41911656	22023814	24563848	15984210	13142176	23597034	10549997	28093928	16432887	24107328	20950704	14153423	14591030	19633728	19905012	14151305	5798953	14705526	44683728	23779544	16693522
	Fatty Acid Metabolism(Acyl Glycine)	3,4-methylene heptanoylglycine	55012	LC/MS Neg	100010861	3818	198.114	-	-	-	-	764412	505027	2701024	918539	560885	1173414	1424133	1724858	589751	2180131	546115	1070918	1124898	1449353	960363	515624	845582	2388469	855759	766718	546092	278281	4040441	706201	1703306	908624	1725812	999772	696857	812697	294588	620616	3617415	549779	568564	960734	1141767	2892980
		heptanoyl glycine	42629	LC/MS Neg	100004195	3720	186.114	23783-23-5	10932172	-	-	57595	97831	105227	148417	ND	ND	74579	62516	79979	ND	149407	101673	30912	127942	ND	ND	65609	145174	169711	ND	42934	83341	182403	95633	ND	ND	64212	54846	124240	63635	106676	87738	217259	41534	ND	80501	80453	109335
		hexanoylglycine	35436	LC/MS Neg	100001527	2900	172.098	24003-67-6	99463	-	HMDB00701	1.94994e+06	5782841	14236614	9342484	2585599	4274873	7706128	3555762	3188550	12574261	6266737	10371601	5544400	10219247	2201802	4298580	3589926	10509378	11520096	4877988	1827116	4501988	12202532	5228715	2358495	3091273	11623624	3.2175e+06	8111531	6979427	4840010	5380171	10831305	3425276	2822894	9465059	3775032	6710240
		N-octanoylglycine	43502	LC/MS Neg	100003940	4335.4	200.129	14246-53-8	84290	-	HMDB00832	111174	191454	ND	312029	ND	66734	113457	113561	149330	99081	ND	95304	288370	37831	123103	ND	ND	487579	520057	ND	89045	105964	126119	369465	66320	90163	137012	89368	212273	ND	ND	184808	371576	212128	246785	ND	80454	338919
	Fatty Acid Synthesis	2-methylmalonylcarnitine (C4-DC)	35482	LC/MS Pos Early	100001596	2440	262.129	149181-64-6	53481628	-	HMDB13133	8861583	9751922	7.59439e+06	8831061	8435625	4478757	8893168	6118428	3926943	10447568	10955551	10716929	6449243	4791438	5293618	8655412	10521160	8535664	6724240	10404813	7729500	8.35649e+06	6661729	8736298	9041462	4543322	8544263	6295099	4596546	7.82461e+06	11079714	7.95057e+06	4423839	4543565	8450021	10569431	9536250	7127250
		malonate	15872	LC/MS Polar	818	3447	103.004	141-82-2;26522-22-85-0	867	C00383	HMDB00691	25588646	28362578	72029632	40902984	20905774	9594595	15501672	32655700	8.11744e+06	22148850	38643868	30774862	11269713	42993176	25348398	65561560	38997568	35944864	25438592	18708066	18007390	33787980	29492522	ND	36210508	9557678	13639860	20774010	7.85986e+06	20908846	33469522	31083518	53809212	25649124	42376608	38343276	34939204	33397510
		malonylcarnitine	37059	LC/MS Pos Early	100001526	2086	248.113	853728-01-5	22833583	-	HMDB02095	3.7734e+06	2331176	3206920	4177094	3324539	2714249	3399217	5460372	2133642	3.31692e+06	4818312	3819177	1712501	2326144	2901898	4021856	3.19996e+06	2893285	2431903	4.06456e+06	3207167	2152537	4526700	4292304	3849115	2496372	2073320	4471863	1886403	3.32186e+06	5022401	3123994	2156755	2146241	3176268	5630033	3060767	3.17963e+06
	Fatty Acid, Dicarboxylate	2-hydroxyadipate	31934	LC/MS Polar	100001153	3000	161.046	18294-85-4	193530	C02360	HMDB00321	12903596	6.77062e+06	129256336	21271092	11221875	4592297	9281390	76022816	3.95023e+06	ND	ND	19378820	7551512	22543688	6882099	32695124	5650115	587726848	12921418	20125276	19389848	11640504	49136032	9851581	35609836	8.25151e+06	11843344	30329198	8.23277e+06	16816600	68459864	7974719	10773404	7.36352e+06	11364453	31372772	5.90856e+06	207372192
		2-hydroxyglutarate	37253	LC/MS Pos Early	100002070	958	131.034	40951-21-1	43	C02630	HMDB00606	2886738	3332390	7137294	6392750	2641230	2502638	7824728	9616611	3179381	11223446	5759468	3828234	4063726	3723974	1362260	8034563	3488923	8548245	7525099	8153124	2323490	3281010	6677583	6626768	6440938	2907316	6914501	7864686	3898381	3146823	4239894	2163201	5044916	2852098	2325192	7693268	3862807	5882657
		3-carboxy-4-methyl-5-propyl-2-furanpropanoate (CMPF)	31787	LC/MS Neg	100001178	2840	239.092	86879-39-2	123979	-	HMDB61112	3145659	1387866	6697833	2256157	2251458	2457406	1723521	4689092	724148	1926805	6112743	550031	5006248	ND	643768	162605	346182	ND	1717687	1700572	1657298	1247626	3209690	1821750	5769069	3.52581e+06	1823602	4314467	690030	464247	4869212	714480	2.09236e+06	3008626	919096	391715	2.01325e+06	194791
		3-methyladipate	36749	LC/MS Polar	100001765	2865	159.066	3058-01-03	12292	-	HMDB00555	16306520	27278182	114934472	24107536	13082729	14600759	10580701	19805692	16009737	24091342	106751896	58311640	47861056	22335150	10202212	9035058	9544799	14071446	18228042	14633724	22308134	25422858	30593274	12925969	35495804	8.36482e+06	19962566	22025272	18749162	12757372	28571892	25570270	26541222	12461920	18317960	16552332	9308297	9563188
		3-methylglutarate/2-methylglutarate	54676	LC/MS Polar	100010834	2832	145.051	-	-	-	-	13372335	14631703	51546532	11087316	8933833	7.33615e+06	14774151	18924230	6.60988e+06	16938364	17675522	13894718	15954705	51561660	3358097	9910106	12476756	14782621	12326370	21649596	12483385	12395699	47269192	10615137	10405209	7.7648e+06	18488002	16507516	8625688	9175774	11843532	9718660	42038560	9788666	5.86518e+06	13807662	15571726	8798432
		4-octenedioate	31941	LC/MS Neg	100001152	740	171.066	38561-68-1	11805205	-	HMDB04982	8992666	6776957	77754280	9353622	5751339	8973767	5316673	9494630	2298031	10615527	11166253	10362307	5376762	9734559	3124318	6099866	6166451	10567073	6233344	8955646	6232266	4173803	18419112	7022174	6479507	5698373	8840714	6316485	3415995	6366626	7.20587e+06	6357963	7.94623e+06	2.07695e+06	6324492	11934981	6041819	4885726
		adipate	21134	LC/MS Polar	100000863	3000	145.051	124-04-9	196	C06104	HMDB00448	12187715	10283187	109465976	132360712	5514008	15989483	4.94938e+06	18915720	4870041	22082322	12534807	15129665	3.6999e+06	24251692	1.62045e+06	8542513	9380082	30911102	6834714	13580819	7.82856e+06	6.95873e+06	16536669	72201824	13539796	5.33194e+06	6.2514e+06	13083356	28876520	8271459	7.43821e+06	18672980	11764508	3.15497e+06	3598949	17189544	12840267	14541487
		azelate (nonanedioate)	18362	LC/MS Neg	2029	1276	187.098	123-99-9	2266	C08261	HMDB00784	18855086	15527893	7589230	4662197	12947121	13397138	10506443	35531028	4562770	7186927	49200000	6491206	4841105	7.45397e+06	20617698	14893279	10965117	49087940	6451038	26408438	20312032	13111189	20161136	4103252	19833768	12427149	9722833	12746618	5086181	5156748	35810644	5128834	19849836	4758557	5117670	23326368	7.57381e+06	30593060
		dimethylmalonic acid	42978	LC/MS Polar	100004251	2702	131.035	595-46-0	11686	-	HMDB02001	1.21754e+06	1.21997e+06	2.43241e+06	1.50829e+06	702039	265687	671701	737872	458700	1.74903e+06	1.24981e+06	782831	663168	2.61085e+06	531333	981694	750646	2.46677e+06	955965	971341	1.1171e+06	2434805	2.5399e+06	1.33442e+06	1.83401e+06	610914	590094	678393	1.19633e+06	1.22152e+06	711036	347573	1181468	594564	553809	734249	658385	1.37251e+06
		maleate	20676	LC/MS Polar	100000707	2510	115.004	110-16-7	444266	C01384	HMDB00176	50582896	21118302	30139126	34642312	29952780	66957692	27349602	36279936	8.24361e+06	72654816	99732312	29972230	12342339	68163336	12821972	49680060	31126604	85773016	14991223	47519496	30714842	19471418	36301504	37353928	55204896	36145236	28384224	28370636	14281804	12762068	49466020	19445234	40950160	19388202	21358118	44643744	58626644	80120272
		pimelate (heptanedioate)	15704	LC/MS Polar	100000101	2745	159.066	111-16-0	385	C02656	HMDB00857	14214555	7.17303e+06	16437370	4.00948e+06	5.57397e+06	7062029	6.3388e+06	19625896	2.17787e+06	22912224	25927020	10370757	2.38482e+06	29985024	8835447	6.28028e+06	8774352	34059352	2.7977e+06	13177159	11714135	10338684	23698758	5085570	22640052	4327673	7824322	8958498	2.15735e+06	8958338	12677340	6091129	11328777	3.54262e+06	5.01976e+06	8958498	8693971	14485030
		sebacate (decanedioate)	32398	LC/MS Neg	100001211	1788	201.113	111-20-6	5192	C08277	HMDB00792	3757921	2118048	647312	1495421	425086	3647895	582977	2970817	ND	ND	1363575	605996	645817	ND	1711576	839865	1098003	703656	2191839	2625492	1332541	368484	595253	1100967	444918	489691	1320289	1042616	85010	ND	1157232	3522180	2444790	402964	2662154	4.05847e+06	2.8727e+06	404887
		suberate (octanedioate)	15730	LC/MS Polar	100000016	2577.6	173.082	505-48-6	10457	C08278	HMDB00893	18048438	10079938	35616980	7561235	8.07473e+06	13945641	7670551	29661894	2.35048e+06	13282507	41653180	9908044	4264482	21005990	9605141	7.32659e+06	13428235	46870060	5186941	15949833	15026469	8765654	18665936	7579622	22947076	5.93524e+06	8043494	8668206	2.60024e+06	6595395	21087436	10771214	10246553	5677448	8661825	13095458	10409477	19423582
	Fatty Acid, Monohydroxy	2-hydroxyoctanoate	22036	LC/MS Neg	100000743	3736.8	159.103	617-73-2	94180	-	HMDB02264	233805	162710	1243807	337429	357055	325917	626106	540089	145268	463290	484795	434178	127682	467638	237789	222302	172282	580466	1407808	335214	156050	340585	1.45051e+06	356473	593985	391624	904939	351675	102787	183942	122435	187203	531840	70816	252763	553644	389941	273128
		3-hydroxyhexanoate	53230	LC/MS Neg	100006367	1725	131.071	10191-24-9	151492	-	-	937911	1078847	1965792	1296693	510213	315871	815724	1645077	390825	ND	612893	312023	1263123	168254	602225	406355	437428	1227590	1798181	752782	388926	836536	ND	1084165	417022	356929	1153106	1050389	372051	134628	ND	612168	1143733	862073	1872599	1140423	1492728	777560
		3-hydroxyoctanoate	22001	LC/MS Neg	100000773	3446	159.103	88930-08-9	26613	-	HMDB01954	607120	172532	2466259	208898	264979	310451	131440	327339	ND	ND	112588	226763	ND	ND	94814	231911	ND	ND	304947	349568	169527	109998	372172	117743	304948	95178	114932	371441	ND	ND	ND	141006	105995	ND	410453	164778	144678	122323
		3-hydroxysebacate	31943	LC/MS Polar	100001145	2411	217.108	73141-46-5	3017884	-	HMDB00350	74361936	8902556	115206552	10267052	14938097	16042403	4.45485e+06	11566641	3.46078e+06	8559542	11366236	17644416	8774965	10190356	4.80248e+06	6556618	11063071	10749500	4.385e+06	18298704	24797532	5.01226e+06	9335908	2.96286e+06	6164844	6455860	10072992	8912772	3.98715e+06	6.13604e+06	8453876	12330238	2.21138e+06	3.65004e+06	10463122	9445199	10831234	13504319
		3-hydroxysuberate	31936	LC/MS Pos Early	100001143	1892	191.091	73141-47-6	22328017	-	HMDB00325	3.80484e+06	2654738	15438487	1294955	1709444	4564234	1.02373e+06	1798521	2251911	6280202	3256678	3073734	876708	2108644	845706	1061309	1.85132e+06	3552167	462785	2146011	2761486	957884	3325511	575268	1819981	2018010	1616682	1113349	1625243	3366576	1753231	1525034	672039	542016	994043	2038841	1354080	2958877
		5-hydroxyhexanoate	31938	LC/MS Neg	100001148	1267	131.071	44843-89-2	170748	-	HMDB00525	3851569	23544862	53698000	22320704	6212140	5032771	4228004	12671489	7098605	8335877	21657060	12801693	3064618	6658923	2234042	5144370	5653343	16835048	6763595	6933584	2450717	14496946	37522232	13436285	6934891	3269146	7190459	7184186	12415384	1879251	19276678	9313875	13798507	1885895	4259141	8994997	8211871	11834133
		7-hydroxyoctanoate	32442	LC/MS Neg	100001223	2232.7	159.103	17173-14-7	167627	-	HMDB00486	ND	156449	ND	442381	ND	ND	ND	836026	451423	1374199	ND	ND	ND	ND	ND	ND	ND	ND	ND	ND	572441	ND	2215784	ND	10161293	ND	ND	ND	485840	ND	ND	ND	362915	ND	ND	ND	ND	ND
		epiandrosterone glucuronide	47111	LC/MS Neg	100005400	4642	465.249	4271-00-5	10298641	-	-	223584	497757	1630075	1337312	284545	182426	728080	538128	127381	1856341	3196311	1104081	361200	71685	129964	763189	213135	2884861	93452	782499	211573	1475523	1143463	1139637	430702	262674	715914	568067	198660	491966	2944029	453618	161830	161051	262256	1682406	271577	2567672
	Glycerolipid Metabolism	galactosylglycerol*	57345	LC/MS Polar	100003064	2518	299.098	16232-91-0	16048618	-	-	4.24056e+06	2.69938e+06	5996116	2461149	5616232	1.17951e+06	3444642	3.36167e+06	1.76382e+06	14402750	10398396	5179756	6391903	2.55846e+06	3.98309e+06	3.40421e+06	3.82388e+06	12170403	1.53714e+06	3.24611e+06	6950519	4325455	9131403	2.58873e+06	5.13666e+06	1.19767e+06	1.73684e+06	5974463	3.20613e+06	7.10383e+06	3.31959e+06	3.02328e+06	3.34869e+06	5917723	1.69875e+06	4623385	2.24619e+06	20519648
		glycerol	15122	LC/MS Neg	1254	758	91.0401	56-81-5	753	C00116	HMDB00131	899285	1279354	543785856	1074533	1080970	991855	804907	874375	431358	ND	2234770	901613	1316157	1978659	222149	2836920	1227492	1855408	ND	993529	523389	1726878	419747168	1141913	687176	807439	984234	742385	889259	682827	750724	931313	1528886	879309	1008557	4263502	1321084	1267585
		glycerol 3-phosphate	43847	LC/MS Pos Early	100000258	580	173.021	29849-82-9	754	C00093	HMDB00126	5437613	4928928	21730752	12020114	8648453	4500574	6018462	11393424	2290827	18822692	7168714	9260774	3980685	11628298	3555601	13060571	3070485	11801820	8.14469e+06	4503868	5044351	5548587	16315190	8086917	9913085	3.90468e+06	6202965	11626286	3088867	12209008	2860666	2253642	9107049	7725511	4.03896e+06	9230323	4752119	8949577
		glycerophosphoglycerol	48857	LC/MS Polar	100001619	2430	245.043	-	439964	C03274	-	1.4306e+06	1.08889e+06	1.554e+06	1.76038e+06	758505	413443	305647	468403	521224	3.57655e+06	7.81813e+06	23957620	1.72168e+06	1.11811e+06	1.94356e+06	727749	1.0195e+06	301249	1183314	906235	1.52219e+06	452109	1.69041e+06	1.18392e+06	291967	567475	520843	603218	542951	1.3344e+06	932640	1.76614e+06	2.05806e+06	1.4496e+06	1.31142e+06	1.36834e+06	1.35102e+06	761206
	Inositol Metabolism	chiro-inositol	37112	LC/MS Polar	100001859	3191.2	225.062	643-12-9	-	C19891	HMDB34220	5454464	446400	ND	1.12096e+06	537744	270082	316219	5043810	270363	672176	2.59502e+06	230487	1.61665e+06	1.44672e+06	6834120	35360044	3.01198e+06	ND	ND	ND	279824	874762	1231509	228594	21395106	192107	846596	3.55356e+06	140252	1406253	2.09401e+06	350790	447322	187009	15716715	31957742	907452	548455
		myo-inositol	1124	LC/MS Polar	363	3506.3	225.062	87-89-8	892	C00137	HMDB00211	7.80027e+06	21844872	9361060	14457337	13123609	3.2479e+06	7.58636e+06	12906082	3.70642e+06	6296509	42265948	5729806	7912661	3.29283e+06	13206848	41635940	18256584	7686120	9556738	4268923	5929776	24272476	10145164	18767336	43996316	5.31893e+06	8086470	24236816	3476208	4.32699e+06	21160686	3.61565e+06	8.17949e+06	8.31174e+06	19641684	62429044	9834072	6349630
		scyllo-inositol	32379	LC/MS Polar	100001215	3468	225.062	488-59-5	892	C06153	HMDB06088	11662666	35331876	12726854	23082172	5640475	3.42124e+06	6.30569e+06	32878768	5920034	18189378	52707612	10946889	17402814	10148732	19615852	30789884	11471478	10002120	12248323	5.94405e+06	8730283	44075924	14865017	17477850	16129528	4044167	6.75911e+06	28763670	6.60561e+06	11913190	32018738	7.92273e+06	15753964	7844646	50467176	64666200	9106006	7.02764e+06
	Ketone Bodies	3-hydroxybutyrate (BHBA)	542	LC/MS Polar	254	1443.3	103.04	625-72-9	441	C01089	HMDB00357	584919	4.13322e+06	109827432	1.80316e+06	1.15394e+06	2.02876e+06	1614266	1.16339e+06	538541	3.40785e+06	1.68408e+06	1.28118e+06	1614266	ND	ND	1.31367e+06	ND	2.41309e+06	788159	ND	575108	1.81315e+06	1642935	1.166e+06	1.25489e+06	886924	2.07613e+06	897118	947191	927806	1852359	1.36789e+06	764610	2.29935e+06	1.41147e+06	3656893	1.85659e+06	2435596
	Mevalonate Metabolism	3-hydroxy-3-methylglutarate	531	LC/MS Polar	112	2700	161.046	503-49-1	1662	C03761	HMDB00355	577900864	261338384	729765888	364444736	310625888	235958432	263654144	530967904	112540200	602833856	615819328	292028672	229529744	615249856	176009120	281847744	246038944	742990656	364036800	538023296	454516608	344241216	571144576	294949408	582759168	208153984	269901472	404596288	147919856	205694352	435761856	120563264	391024000	252440880	268984512	343548096	252470608	519367296
		mevalonate	39583	LC/MS Neg	30	860	147.066	96949-03-0	439230	C02104	HMDB00227	3.50572e+06	3.37443e+06	27953722	4.04655e+06	2.60236e+06	2166251	2531159	4.79331e+06	1.73969e+06	7332760	14989393	1.8895e+06	647284	4857052	1.9821e+06	2.79876e+06	2.42125e+06	13710086	3.68055e+06	4520376	1.64224e+06	4.07966e+06	5.20043e+06	3.08714e+06	3.67523e+06	751426	2.46938e+06	3920629	2327174	1.08012e+06	3720162	1.03568e+06	2.09922e+06	655914	1.07709e+06	4431287	3.05042e+06	8398209
		mevalonolactone	48118	LC/MS Pos Early	100000772	1375	131.07	674-26-0	10428	-	HMDB06024	3437353	9074971	32430132	6098922	5398099	1442025	7078374	6615688	2263452	30810250	13946405	4705538	5605013	8632698	3941859	4.85505e+06	6.84543e+06	27938920	5558806	6044894	3.70022e+06	10257389	10408366	7838895	10785815	2971412	4683573	6053910	3.30466e+06	11399409	6.6292e+06	3.4702e+06	9509362	3292003	4.34533e+06	7.8741e+06	6852408	16427130
	Phospholipid Metabolism	1-palmitoyl-2-oleoyl-GPE (16:0/18:1)	19263	LC/MS Pos Late	1526	2509	718.538	26662-94-2	5283496	-	HMDB05320	46978	68644	185734	103226	ND	ND	87333	69824	45125	156167	211540	ND	ND	232672	ND	ND	53562	236424	7791890	84291	ND	102825	199585	143955	ND	ND	89686	31032	ND	165430	88757	ND	106864	ND	77168	116118	82949	115559
		choline	15506	LC/MS Pos Early	1256	1961	104.107	67-48-1	305	C00114	HMDB00097	159352560	276130048	151933760	160954816	205582864	106418424	236456160	232657216	65086672	393472512	294608288	198753200	272525184	148151840	87058184	259652464	203557872	288695200	326395776	185390736	180999936	324679232	226144176	183790240	252492464	131698696	233242784	235914672	96030856	184837712	191905296	135613648	189619888	186866784	121022120	325031776	168162448	307309664
		choline phosphate	34396	LC/MS Pos Early	267	700	184.073	72556-74-2	1014	C00588	HMDB01565	6450576	6068751	23602376	12173969	9714807	5012895	11776254	29161338	3270398	26545324	8179372	8229772	5395454	14410536	3398697	31449742	3.66173e+06	11998827	23457888	6835623	4296133	11589263	13713890	9734122	10269987	4532225	13960658	22348888	4616170	13201763	4158293	2.82745e+06	9744083	8899227	4976274	19889152	9308421	11542062
		glycerophosphoethanolamine	37455	LC/MS Pos Early	100001620	659	216.063	33049-08-0	123874	C01233	HMDB00114	2730604	4369402	8368227	5997189	4477935	3182606	6074332	5932402	1538670	9996195	5.52595e+06	2719908	5188999	6644895	2160377	4605979	3286741	4536546	5487665	3563770	1725912	4230622	5927295	5629768	5589002	3497617	5681267	6245120	1937119	5820334	3373697	2031585	5488037	4799346	2873339	5958048	3875637	4056541
		glycerophosphoinositol*	52307	LC/MS Pos Early	100001621	516	335.074	16824-65-0	-	-	-	365796	387408	1242822	275527	296753	ND	180823	558599	ND	781149	670167	438479	126462	603011	75124	539438	335796	1058719	182978	329738	333031	180708	635694	191311	866639	ND	128298	415569	83128	297588	300985	68253	867276	130810	113574	603117	285465	985141
		glycerophosphorylcholine (GPC)	15990	LC/MS Pos Early	100000269	672	258.11	28319-77-9	71920	C00670	HMDB00086	7454024	12337102	44161536	9058095	5621713	3063529	6.54571e+06	7829462	3436977	27461768	19934910	9030913	6.8471e+06	22039512	2164092	8643644	5141948	24836088	2303012	4511267	3489517	14222300	23612044	12568335	11481367	3454814	6336296	3939461	3023814	8858258	10754975	1677610	13875706	2186898	4487209	16142190	6890991	11667810
		glycerophosphoserine*	57404	LC/MS Pos Early	100015666	577	260.053	-	3081457	-	-	945728	1359445	2.01211e+06	1642369	1041032	850022	1023046	1674920	610747	1933883	2425702	1200306	862467	1906117	576993	1910549	1189976	2685388	1182310	1505863	816989	1091837	1391969	1915021	1905611	929677	831366	1024808	735378	1253905	1643671	839175	1573298	329949	926932	2670603	1137700	1731284
		phosphoethanolamine	1600	LC/MS Pos Early	1026	700	142.026	1071-23-4	1015	C00346	HMDB00224	5168828	6618067	10916281	7913481	8185596	4953270	8020535	12414721	2421775	22327450	5522078	7731758	8384678	8632623	3.80992e+06	19462582	3.58767e+06	8885620	12656049	4356323	5418931	12482457	7.37738e+06	6461703	7.48233e+06	5098192	11170034	11597536	3281030	14031602	3233588	3372986	7.32008e+06	10153730	4571398	12500932	5472044	5820162
		trimethylamine N-oxide	40406	LC/MS Pos Early	100003397	2100	76.0757	1184-78-7	1145	C01104	HMDB00925	328882304	467503488	1663763456	503395360	501227552	369722144	554553408	382328224	143237712	622679424	524691328	306331840	553765760	566658880	273793344	803561024	646972672	747471936	543045376	522555776	424463520	500540640	1018291712	599830144	843222720	535263040	1576877568	396516768	338465024	440817760	410102368	307022304	698961856	261023264	347906560	611817472	542601152	641428480
	Plasmalogen	1-(1-enyl-palmitoyl)-2-oleoyl-GPE (P-16:0/18:1)*	52477	LC/MS Pos Late	100009005	2600	702.543	-	-	-	-	53858	97066	208103	70628	46578	ND	132728	ND	ND	206117	270117	ND	ND	675390	54629	ND	72396	291799	388071	129147	ND	164781	179082	204890	133147	ND	139371	ND	83594	208747	116276	ND	170031	ND	162486	83876	179963	144042
	Primary Bile Acid Metabolism	cholate	22842	LC/MS Neg	136	5165	407.28	81-25-4	221493	C00695	HMDB00619	2347885	3504415	303327	64785	72913	511384	2182415	3618485	57573	1.13772e+06	2867996	1141894	1789101	143829	381495	210274	87132	6125489	1943505	1616569	2039852	3508229	166121	ND	1664478	113507	290282	680218	419059	191288	1.5729e+06	904907	171007	ND	ND	509816	100113	2053291
		glycochenodeoxycholate	32346	LC/MS Neg	1628	5236.1	448.307	16564-43-5	12544	C05466	HMDB00637	ND	12092.8	64435.2	7001.7	ND	75739	5501.2	168974	ND	186027	252125	133150	103950	77521	11178.3	306807	27347.3	631456	105743	35985.9	37298	ND	153805	ND	ND	51204	ND	ND	ND	47211	125043	ND	88931	ND	ND	618876	ND	289082
		glycochenodeoxycholate glucuronide (1)	52983	LC/MS Neg	100009264	4806	311.666	-	-	-	-	395868	433863	990784	169941	262520	381987	122669	812917	ND	427104	912030	1188970	260821	2339775	169007	253448	817939	2537743	255696	914383	259379	151215	1417269	246870	402023	406217	108589	208167	61356	70234	573336	637519	2428687	65929	29954	471927	583813	1306440
		glycochenodeoxycholate sulfate	52974	LC/MS Neg	100006641	4820	263.628	-	-	-	-	771512	658618	715862	909176	741189	1020663	1239438	4714485	ND	2234521	5729570	901680	3866205	1250208	556678	8763679	765916	5558473	8953978	886774	1062965	133160	1184585	1699830	676840	644455	1586879	1625785	158295	816905	3561342	597164	1659521	2027510	708273	17735904	1292250	1316589
		glycocholate	18476	LC/MS Neg	342	5163	464.302	475-31-0;863-57-0	10140	C01921	HMDB00138	281091	92388	214406	251148	439539	361636	531792	928209	98313	444821	1312644	352181	546184	372651	60985	832804	403040	2417853	1266500	620729	236517	122596	460634	392535	454315	523386	535964	568915	52842	124913	861593	225736	578634	222362	63738	2208866	715695	542432
		glycocholate glucuronide (1)	52977	LC/MS Neg	100009259	4533	640.334	-	-	-	-	222987	1.76919e+06	577941	350825	382236	196667	332964	427940	302249	175992	2807041	3.65062e+06	185420	1264958	130865	ND	215481	354474	131241	3398487	128122	142349	628409	370775	1342647	347329	280533	354831	198038	ND	1302446	1618317	3936412	33689	349326	193550	201976	121275
		tauro-beta-muricholate	33983	LC/MS Neg	100001250	4774	514.284	25696-60-0	168408	-	HMDB00932	210644	71333	ND	95116	387641	ND	49155	120407	23104	ND	226309	801425	128698	44206	ND	ND	76918	ND	140022	106855	153663	35247	ND	53270	728613	ND	170951	ND	26638	ND	309080	456738	35584	72122	ND	ND	43927	ND
	Secondary Bile Acid Metabolism	12-dehydrocholate	44644	LC/MS Neg	100001072	4871	405.265	2458-08-4;2458-08-4	94235	-	HMDB00400	202670	719510	ND	ND	ND	233097	310054	251336	41705	3428426	217083	334703	532186	ND	355354	949810	ND	1233600	136955	111852	177835	69842	49911	30611	136771	72080	ND	ND	115276	709772	127834	448278	51908	46579	93008	1897770	ND	773599
		7-ketodeoxycholate	31904	LC/MS Neg	100001063	4821	405.265	911-40-0	188292	-	HMDB00391	4193249	2539046	ND	ND	ND	726674	311131	1842449	ND	3.3998e+06	2300097	706072	1929008	51202	112690	536363	ND	1461325	320330	162040	4823086	2775360	ND	32937	140189	365841	44846	193209	169512	949493	878110	503082	87309	ND	19916	353771	22114	1091796
		deoxycholate	1114	LC/MS Neg	302	5294	391.285	83-44-3	222528	C04483	HMDB00626	324131	859523	467115	ND	178069	411817	138437	302194	ND	184327	232668	909572	168609	719861	111149	ND	93142	1.49428e+06	1994069	1207132	405106	637220	536768	90019	1324090	478667	ND	154687	107344	50865	97871	371888	792274	ND	124108	ND	89528	878683
		deoxycholic acid sulfate	52969	LC/MS Neg	100006638	4880	235.117	-	-	-	-	663968	977954	132967	ND	ND	ND	217217	485236	ND	ND	144811	712204	341143	164367	61979	ND	ND	914139	ND	522295	294125	183480	ND	ND	302757	111329	ND	78998	36206	ND	ND	603907	351734	ND	ND	ND	ND	661235
		glycocholenate sulfate*	32599	LC/MS Neg	100001989	4750	254.623	-	-	-	-	6653028	7615277	12891322	3433835	458386	1412430	3241596	5410737	676106	3361229	9619206	7459944	4900889	6448965	1241186	4817116	2503373	7428591	4584918	2301975	7687744	4619814	10436183	3435069	884735	1275778	2757671	4073686	472111	1170459	5295207	4.00895e+06	6430459	1030323	2121651	8.14684e+06	2522689	4600709
		glycodeoxycholate	18477	LC/MS Neg	100000436	5281	448.307	360-65-6	3035026	C05464	HMDB00631	85496	127477	400456	112966	194993	159823	40352.7	319130	ND	69640	620469	489940	116411	172725	51900.6	ND	292260	1544825	181664	426892	102522	ND	717845	124093	505900	285861	ND	ND	ND	ND	304257	188615	564969	ND	ND	ND	177873	692207
		glycodeoxycholate sulfate	52975	LC/MS Neg	100006642	4875	263.628	-	-	-	-	2998639	3183327	6587739	2677994	2942229	2729778	2226840	7.32892e+06	913476	1715276	10611332	9388511	6722937	15700122	818304	ND	4004488	16201078	8693825	5784221	2044279	474914	7.14848e+06	4300202	3911946	2841750	2384644	3586055	1223667	504380	5816054	7.63688e+06	14593170	4641388	1348335	ND	5907440	4745111
		glycohyocholate	42574	LC/MS Neg	100004083	5020	464.302	-	-	-	-	ND	ND	ND	ND	ND	ND	39574	ND	ND	ND	259363	54409	125818	ND	ND	225385	ND	230727	346149	ND	ND	ND	ND	77198	ND	ND	59266	ND	ND	ND	205837	ND	ND	98330	ND	446458	34202	70453
		glycolithocholate sulfate*	32620	LC/MS Neg	100001657	5011	255.631	15324-64-8	72222	C11301	HMDB02639	7957126	3667797	16628405	6.90191e+06	3.86051e+06	4795133	2634480	7729215	2597537	2635983	15589571	15086968	3747476	14871300	715430	153137	5064411	8516845	9622302	11239021	5858196	857387	15298497	10849205	6.52391e+06	5.92803e+06	4890917	4306677	1191533	827350	7853946	8236609	16860460	1458119	2008963	766142	8085674	3777223
		glycoursodeoxycholate	39379	LC/MS Neg	100002911	5033	448.307	64480-66-6	12310288	-	HMDB00708	426832	140740	118066	44371	141428	ND	188323	334593	640900	226268	262252	859765	99148	210906	ND	279397	231522	1736367	931142	682752	406501	ND	95831	176354	184138	36157	67109	97409	701421	180937	136438	666291	265656	ND	ND	553360	198248	810346
		taurocholenate sulfate	32807	LC/MS Neg	100001990	4750	279.614	-	-	-	-	550609	424966	1.94758e+06	1493253	167927	104193	589626	754529	115073	108393	2747396	1188331	1303326	911347	189178	861082	471119	739122	446739	109622	944040	198188	1817431	1870165	80991	76777	887757	741428	62908	20847	1810106	408608	702984	533274	474894	1341828	470409	261209
		taurolithocholate 3-sulfate	36850	LC/MS Neg	100001658	5026.7	280.622	64936-83-0	440071	C03642	HMDB02580	1322626	879282	2036901	4249698	795471	411481	975095	1721672	522264	147758	4559317	2494632	851421	2341016	166974	ND	1342624	945376	1113186	873593	1043848	ND	2476323	4693778	901097	587055	1588247	863946	323042	ND	3634052	1270480	1953632	533060	522071	ND	1556962	321822
		ursocholate	57573	LC/MS Neg	100002913	4648	407.28	2955-27-3	-	-	-	1080476	4216787	155994	28805	382726	28365	384424	575896	ND	760898	366952	242735	5002983	825404	133926	654738	58791	11246756	1696199	426603	812773	1530796	195510	48995	1006739	22028	16014	114924	112091	2943381	208008	260799	831726	217264	ND	1.01948e+06	58742	8.28567e+06
	Sphingolipid Metabolism	sphingosine	17747	LC/MS Pos Late	297	1393	300.29	123-78-4	5353955	C00319	HMDB00252	188688	112603	122570	160087	107127	48275	63997	ND	85551	365391	72708	137787	58321	4.00343e+06	ND	80062	148460	116781	279707	104610	124797	202052	132174	400006	135559	78526	49157	ND	227859	1407500	ND	84883	241365	79036	238703	ND	391973	61620
	Steroid	11-ketoetiocholanolone glucuronide	47135	LC/MS Neg	100005402	4280	479.229	17181-16-7	-	-	-	7132002	5114101	5414758	9542987	5830112	889047	5287878	10592225	5513737	2632940	13081086	7935866	2733904	593223	657299	2231008	2.88278e+06	5184678	221201	4.67519e+06	4479412	6.55539e+06	3816681	10673412	5833997	1887535	5979765	10947824	7368003	798243	10245399	4244653	235013	1119933	1465753	3422818	4677815	2308941
		11-ketoetiocholanolone sulfate	38167	LC/MS Neg	100002125	4420	383.153	-	-	-	-	147499	80507	97974	80143	ND	113197	80104	120545	ND	ND	181882	344485	304425	ND	ND	ND	ND	329836	ND	41469	119550	164828	ND	103050	68734	65500	77682	72906	43811	ND	145195	195254	ND	78641	ND	ND	38815	153910
		16a-hydroxy DHEA 3-sulfate	38168	LC/MS Neg	100002126	4240	383.153	-	-	-	-	3734494	4066494	51603	1244170	629002	930173	1.90077e+06	6490141	634541	499416	3356433	15662369	2936942	405392	216983	1882728	428614	19899140	558374	2683432	2796016	3539904	136240	3290542	2747077	2169632	1563381	2249802	655345	1420555	2675925	16603548	443903	1063468	454946	2818053	296126	12943171
		17alpha-hydroxypregnanolone glucuronide	47403	LC/MS Neg	100005418	5071.9	509.276	-	-	-	-	833671	1.97077e+06	5685123	4.5181e+06	2039532	529602	3.45126e+06	1.55817e+06	ND	6828756	9194790	801566	2787897	479975	ND	4.95872e+06	1.4736e+06	10473656	147706	4.96506e+06	434960	4368479	4810574	12763327	4.95864e+06	1401170	3684073	3.26843e+06	159168	1688338	6721408	ND	1107613	984990	856832	12200124	1.11458e+06	7991763
		21-hydroxypregnenolone disulfate	46115	LC/MS Neg	100001999	3935	245.067	1164-98-3	134595	C05485	HMDB04026	1274858	3597487	1256061	1771656	658324	1617124	1475113	2516217	300832	4244480	6982463	3707354	3586282	984673	415981	3730430	878451	13671888	258174	2.00053e+06	1208764	4.1875e+06	802881	1751907	834488	2020411	1318598	1928131	313447	1810509	6526230	2338290	559646	882596	646363	7231794	849242	9211583
		5alpha-androstan-3beta,17alpha-diol disulfate	37187	LC/MS Neg	100002021	4215	225.07	-	-	-	-	74319	ND	ND	ND	ND	ND	83781	264783	ND	48650	921751	338547	ND	ND	ND	61742	ND	533454	ND	368048	26255	66543	ND	61264	ND	ND	26798	82170	37500	ND	981459	374591	ND	ND	ND	77938	ND	274132
		5alpha-androstan-3beta,17beta-diol disulfate	37190	LC/MS Neg	100001987	3880	225.07	571-20-0	242332	C12525	HMDB00493	ND	671779	206615	178337	210012	83136	451676	751814	ND	376622	711764	ND	95549	ND	ND	364651	57490	3880435	ND	350443	ND	481445	562398	341534	492837	104828	289952	265143	ND	195258	747273	ND	72191	ND	ND	619046	ND	2193330
		5alpha-pregnan-3(alpha or beta),20beta-diol disulfate	46172	LC/MS Neg	100002015	4310	239.085	-	5127902	-	-	ND	ND	ND	1889392	ND	22626	ND	ND	ND	ND	241319	ND	231319	ND	ND	42380	ND	413508	ND	ND	ND	ND	208870	8589601	ND	ND	ND	ND	25481	89793	114425	ND	643899	ND	ND	197264	ND	984874
		5alpha-pregnan-3beta,20alpha-diol disulfate	37198	LC/MS Neg	100001988	3962	239.085	-	-	-	-	391356	983350	297600	25984566	222821	565652	191378	455406	ND	1001613	1657779	678601	1781360	171427	ND	260631	49823	1796724	ND	413223	437986	665103	395258	72278920	229753	425133	206506	243511	ND	2265516	1436649	449249	92482	248920	ND	709601	ND	913564
		5beta-pregnan-3alpha,21-diol-11,20-dione 21-glucosiduronate	47401	LC/MS Neg	100005417	4732.4	523.255	-	-	-	-	660856	1411077	511215	1260285	830555	489226	878760	2733730	371782	2416307	3491171	1.9102e+06	596434	595311	314668	1489684	724113	2021607	235383	1042275	678041	2082778	369679	1112850	1486269	1210699	713037	2152153	392651	841416	1.81e+06	546580	565890	274065	571569	3351808	1004059	830682
		andro steroid monosulfate (1)*	32827	LC/MS Neg	100002152	3871	383.153	-	-	C04555	HMDB02759	646780	2047838	76303	1281184	468645	404272	837869	1217053	115421	1202055	2389661	2680725	834679	331026	235643	1313157	269889	5813145	159671	741004	596091	2383625	196341	1991729	593465	747466	717732	757508	128047	1047728	2639718	1998833	289025	470079	416013	2698167	205916	4092040
		androstenediol (3alpha, 17alpha) monsulfate (2)	37207	LC/MS Neg	100002026	4712	369.174	-	-	-	-	ND	ND	ND	ND	ND	ND	ND	ND	ND	ND	ND	ND	ND	ND	ND	ND	ND	816975	ND	ND	ND	ND	ND	ND	ND	ND	ND	ND	ND	ND	ND	71546	ND	ND	ND	ND	ND	557286
		androstenediol (3beta,17beta) disulfate (1)	37202	LC/MS Neg	100001992	3740	224.062	-	10634	C04295	HMDB03818	842293	6445823	1.28466e+06	2579651	530175	2157953	2719315	9992718	239408	4.14106e+06	11524190	2153702	3394354	757325	589481	5929648	965026	55189300	995244	1562030	654537	5857570	2239184	4045854	1049060	2882197	2066412	7573568	346176	2995606	12066673	1775676	1000556	1140813	1096593	11166554	837820	33440592
		androstenediol (3beta,17beta) disulfate (2)	37203	LC/MS Neg	100001994	4065	224.062	-	10634	C04295	HMDB03818	3115657	7241961	3.93674e+06	5090135	2177446	4285529	4757370	6683241	538578	8747887	17685214	9538979	7453432	1084371	898643	9462768	2.07617e+06	46744984	1378468	5044962	2853153	7898683	5457566	5062450	3707420	6429195	3994365	5482273	874343	4756164	17528754	7326805	1057741	2177825	1415900	16762879	1789671	28331072
		androstenediol (3beta,17beta) monosulfate (1)	37211	LC/MS Neg	100002028	4500	369.174	521-17-5	-	-	HMDB03818	161243	333235	ND	169128	ND	ND	120921	559110	355876	27878	425291	354052	886239	44936	ND	131189	40119	19877396	143744	102014	76454	550532	104031	484282	48050	74570	47746	451367	473454	78095	230961	620354	43580	184049	35298	206427	ND	16399559
		androstenediol (3beta,17beta) monosulfate (2)	37210	LC/MS Neg	100002029	4500	369.174	-	-	-	-	ND	ND	ND	ND	ND	ND	ND	ND	ND	ND	ND	ND	ND	ND	ND	ND	ND	537982	ND	ND	ND	ND	ND	ND	ND	ND	ND	ND	ND	ND	ND	ND	ND	ND	ND	ND	ND	400221
		androsterone sulfate	31591	LC/MS Neg	100001073	5022	369.174	2479-86-9	159663	-	HMDB02759	1329965	11349904	3979336	6569056	276177	1500714	8415994	3431613	2192898	4249159	12279075	3396231	14685919	2270670	2122866	2621935	2527622	49501504	1325586	2353677	774781	14394986	7159138	8454096	743561	2327739	4293228	3281101	1906855	3830819	9865713	2851140	2513114	6264782	3633888	4310712	1782416	34624496
		cortisol	1712	LC/MS Neg	356	4713.2	361.202	50-23-7	5754	C00735	HMDB00063	169773	125972	ND	318763	49153	ND	668709	509023	82512	130658	224425	86413	1019995	ND	ND	203422	ND	96824	ND	116528	88743	793761	25361	293006	39562	132930	359748	326541	75531	157625	307393	54624	ND	350039	21829	493195	29840	93746
		cortisol glucuronide	47400	LC/MS Neg	100005434	4246.5	537.234	-	-	-	-	225914	155401	162899	325816	176527	97764	247018	504952	44945	281541	463720	199309	305156	108546	56609	616595	155935	459320	ND	524163	157119	618781	166326	352811	254462	228246	218093	337107	85114	150801	349798	56019	55906	66743	143564	937990	205590	393837
		cortisone	1769	LC/MS Neg	273	4572.5	359.186	53-06-5	222786	C00762	HMDB02802	505347	429990	423121	1042820	674384	356618	1319797	1163217	610933	592173	1024963	521760	2781715	81009	488034	1070989	514479	935590	114675	1002770	485930	1160104	368839	1.3217e+06	570972	1.02675e+06	856719	772843	547352	660002	968537	605815	191828	1252420	759238	1406551	413474	937091
		cortolone	40040	LC/MS Neg	100002549	5059	365.233	516-42-7	160499	C05481	HMDB03128	318804	775288	222314	328791	123462	66597	406460	234038	ND	397450	492844	258967	1787331	109526	82345	478301	210963	463933	ND	770228	254993	1030199	143789	687189	146251	225497	140391	100522	ND	236816	224988	127788	78183	401363	160752	1089519	195044	212107
		dehydroepiandrosterone glucuronide	47109	LC/MS Neg	100005405	4510	463.234	-	-	-	-	ND	118144	ND	422557	ND	108362	80287	134449	ND	522049	528728	128761	141286	ND	ND	156033	82970	525534	ND	37938	ND	295171	ND	260562	ND	78342	60580	144677	ND	170609	499679	64278	ND	61002	155510	314591	122188	447633
		dehydroisoandrosterone sulfate (DHEA-S)	32425	LC/MS Neg	100000792	4745	367.158	651-48-9	12594	C04555	HMDB01032	738864	4.08278e+06	180681	667389	ND	283833	697391	3912996	3255054	564955	3433148	2388453	5805157	252087	156902	1161367	382860	111879680	418601	698170	460983	5411888	381019	1882203	348030	749859	355602	2959746	3734538	803660	1659177	5210579	326684	1332340	275665	1.55451e+06	243891	68905736
		epiandrosterone sulfate	33973	LC/MS Neg	100001287	4855	369.174	22229-22-7	-	C07635	HMDB00365	150941	2108354	830025	1175018	ND	115391	1633693	1104491	884502	641169	3498248	529755	1133666	186998	146152	409090	390510	14621731	ND	642038	115909	2534838	1345002	2104667	131389	218263	739262	727670	1063654	779727	2747472	514733	246625	397630	312696	698484	212425	8760999
		etiocholanolone glucuronide	47112	LC/MS Neg	100005403	4915	465.249	3602-09-03	-	-	-	5279064	18513216	43410316	30267400	3224158	5496426	11052626	26765672	5714080	43136424	49459176	18444532	13020493	7.41222e+06	4743559	9244254	5611815	47840648	3.88461e+06	19193984	4014615	24901552	29813248	15868956	3926097	6377875	9778219	20161486	6125586	16438839	38750520	10430289	6963094	6459871	9523017	16890284	6406298	28795754
		pregn steroid monosulfate*	32619	LC/MS Neg	100002067	5000	397.205	1247-64-9	-	-	-	ND	ND	ND	ND	ND	ND	ND	ND	23618	ND	ND	ND	ND	ND	ND	ND	ND	930916	ND	ND	ND	ND	ND	ND	ND	ND	ND	ND	ND	ND	ND	ND	ND	ND	ND	32056	ND	599448
		pregnanediol-3-glucuronide	40708	LC/MS Neg	100003470	5145	495.296	1852-49-9	123796	-	-	1894160	6096790	5561674	101188000	1751954	1824578	1295659	4554265	1608978	5.9577e+06	9156696	6692911	6.21509e+06	1839575	693648	1753418	1.04445e+06	8349192	506444	3447719	2296545	3663193	5050836	319277696	2075840	2002181	1652550	3.00496e+06	1537281	6701179	7251639	2847151	1416351	2300806	1060412	2414113	610336	5648125
		pregnen-diol disulfate*	32562	LC/MS Neg	100001993	3868	238.077	-	-	-	-	2464269	9550226	2285837	1694830	3065425	3632396	3931201	6621807	291070	5027164	23525528	4690342	6322029	1468316	737607	10033887	947292	40087804	803716	4267779	2531613	7583694	2759400	2367884	4319203	3.85507e+06	3.83564e+06	6500023	348934	2630499	19103088	3270232	1128277	2936696	1335821	18154522	912241	25708418
		tetrahydrocortisone	38608	LC/MS Neg	100002403	5121	363.218	53-05-4	5866	C05470	HMDB00903	133704	446383	213662	174409	156305	155871	152658	222780	42690	673722	351702	185067	614882	82366	ND	419284	158222	793474	ND	702932	91632	902300	93603	227278	156767	366732	89736	99642	ND	194151	190690	53428	73821	125615	143870	1637885	104970	302914
Nucleotide	Purine Metabolism, (Hypo)Xanthine/Inosine containing	allantoic acid	33434	LC/MS Polar	218	2960	175.047	99-16-1	203	C00499	HMDB01209	849767	948872	11743021	1.21623e+06	1.23923e+06	888141	954714	2208064	624049	2.20845e+06	ND	1.94362e+06	683200	3.26618e+06	589899	1.37988e+06	858218	1.96709e+06	194395	2.90905e+06	1.7961e+06	1.38656e+06	2.54541e+06	595824	3725162	630116	1.46726e+06	1.5543e+06	4.61788e+06	1433797	759996	653391	950569	2886830	243728	1829326	213669	1.68273e+06
		allantoin	1107	LC/MS Polar	1002	1672	157.037	97-59-6	204	C02350	HMDB00462	19564588	33676172	25663026	10363430	27309202	6515481	24567324	15016673	7478304	41133464	45490976	19410838	17876364	29947932	20604636	30235978	21064896	53951168	13428368	22094760	19294286	44877172	41069844	9420737	27700068	5497282	16917618	27321348	10648446	14197141	44190104	20413478	20509972	15602833	10758443	36193044	20584926	81465808
		hypoxanthine	3127	LC/MS Neg	171	1291.2	135.031	68-94-0	790	C00262	HMDB00157	5480361	16604302	32908908	8751634	7226898	1077420	15774603	52348040	904364	11793894	11583266	8812563	17647256	5608099	987345	8656571	3933847	15602681	21518208	13241632	2903860	14940078	15595388	8261644	14808309	1848108	15488186	25941574	755378	3975016	10411858	1817758	6011237	3369629	9929377	15430898	6544602	7776697
		inosine	1123	LC/MS Neg	361	1602.1	267.073	58-63-9	6021	C00294	HMDB00195	1696658	1412745	3709335	1487222	1416312	418257	1105731	3108798	207959	1291887	1.87701e+06	1091888	1.34391e+06	604302	276430	1791056	737569	1619112	2752595	3765250	1306688	1274068	2057196	1604995	2262651	445060	901376	756274	148244	408727	1370608	514925	1072592	614720	1023791	4233860	1139979	877280
		N1-methylinosine	48351	LC/MS Pos Early	100001409	1430	283.104	20245-33-4	65095	-	HMDB02721	21657680	42735620	62732776	31361360	27776418	8661364	25914792	33108302	6779574	67522848	45060268	29685470	41608740	41510600	12061944	21079804	35990924	60869844	22140036	34593632	21063128	27737348	34085604	29276152	37109432	23157120	21250806	29349726	8628381	28791932	28938482	15837461	43157728	16703847	17834710	38498476	25448412	29494228
		urate	1604	LC/MS Neg	1134	757.1	167.021	69-93-2;120K5305	1175	C00366	HMDB00289	856328320	924107584	967983104	1219900416	623102272	308532352	879430976	780810368	377226496	973874496	841020544	772384896	490941280	667216256	561646336	657592128	603708096	891427776	1365418368	902157376	664239104	665449664	767667264	887498112	468644704	381947072	769253184	499871744	356638816	689285760	748720768	536285504	872475520	514341408	789515264	458304096	931661184	913496832
		xanthine	3147	LC/MS Polar	1004	2023	151.026	69-89-6	1188	C00385	HMDB00292	35236760	70294600	33763276	59186604	11011529	21541416	25449836	137226672	3.33414e+06	44266072	40297160	33597720	38466860	18007284	19756074	16796282	25845450	27169598	74650728	21734454	16908444	44481504	23958678	36224984	10195391	30180050	23674196	35615164	2.67061e+06	25412938	34645024	22929230	28672946	13981412	76886184	21571868	40352356	11406743
		xanthosine	15136	LC/MS Neg	100000299	1075	283.068	146-80-5	64959	C01762	HMDB00299	3085072	3463253	10396665	3589644	2236113	1969123	2909043	20000504	868025	5717690	5979064	2820149	3200339	3.33154e+06	1494686	3.46081e+06	2066982	4993734	5872175	3.30235e+06	2514706	3894310	7210025	3314115	3.68348e+06	2103183	2225710	6426396	990128	2153275	4.10246e+06	1470497	3205429	1.7573e+06	2513381	4778540	2505176	4360756
	Purine Metabolism, Adenine containing	1-methyladenine	1527	LC/MS Pos Early	54	2133	150.077	5142-22-3	78821	C02216	HMDB11599	6948869	2136432	11251313	1640022	1.95635e+06	ND	2.05565e+06	3.566e+06	1950392	5126402	10620763	3.30398e+06	1.62506e+06	5829244	3.71255e+06	2.87569e+06	1593810	6834423	22192688	3.74312e+06	3.86243e+06	2795842	5296931	10414335	6035047	927719	1.8271e+06	2.53226e+06	1398208	2828971	4498853	4220593	2.16054e+06	2.66547e+06	2.75576e+06	3.83754e+06	2.7614e+06	9195509
		2'-deoxyadenosine	1553	LC/MS Pos Early	211	2252	252.109	16373-93-6	13730	C00559	HMDB00101	323133	902506	161725	479426	ND	310922	808045	376322	ND	889139	530596	468405	375875	199228	ND	325945	467357	287724	ND	ND	346199	744838	445899	ND	210927	407969	519921	427523	157650	482012	556326	266948	458640	ND	ND	456893	182751	408047
		adenine	554	LC/MS Pos Early	880	2221	136.062	73-24-5	190	C00147	HMDB00034	5339161	11197715	1275358	6101407	3311691	2787557	9551247	6689324	3356929	5234563	7684194	9965730	8387165	11553290	5946585	7651136	6.98509e+06	8445646	27464382	40519200	3567087	9863686	1022255	12683667	2302537	1905818	8579494	4586988	9084631	9219207	8047984	6166201	4696307	7.75736e+06	6451931	9341516	7.72458e+06	7777740
		adenosine	555	LC/MS Pos Early	798	2169	268.104	58-61-7	60961	C00212	HMDB00050	4676444	5090547	7698030	6800614	3291765	3878742	6534687	3363740	961845	6171312	5551194	3488253	7310167	2258699	5085747	8194085	4112039	2819216	583423	ND	5430269	4101253	5862212	5783468	4712177	2844471	6718561	2286705	667102	3208182	5647047	3624120	2124875	9793700	4566780	12293248	3317853	2288219
		adenosine 3',5'-cyclic monophosphate (cAMP)	2831	LC/MS Neg	207	1952.2	328.045	60-92-4	6076	C00575	HMDB00058	6052234	4066614	9968104	5083687	2886487	2069408	4227158	4445856	1447362	9045096	6614793	4142247	4491385	5363124	2297908	4.60051e+06	2593671	14060898	8187035	4348205	5529495	4343850	7280775	4849722	3279526	2128727	4169762	2997853	1590145	3518745	5048297	1900462	5474018	2926122	3862030	6280214	2454611	8969182
		N1-methyladenosine	15650	LC/MS Pos Early	1242	2120	282.12	15763-06-1	27476	C02494	HMDB03331	70827888	67115488	53822148	63726288	35894060	34841524	45447864	64434044	36952300	86790848	84560048	67224584	52813760	69165504	37351908	32719130	45707896	93766528	64262200	50670968	54151032	68980064	53620064	51847908	49138684	31689264	21450548	49449676	34121652	48247072	65783960	41696076	58216236	42527648	51835052	58187212	55625148	68349952
		N6-carbamoylthreonyladenosine	35157	LC/MS Pos Early	100001415	2008	413.142	24719-82-2	161466	-	HMDB41623	3035554	3207614	3084513	1396909	1849776	1541077	2221613	3260922	1307230	6.18106e+06	4667575	2.79276e+06	2360421	3890930	1.58937e+06	2544760	3069270	5448960	4487347	2660589	2274380	3341009	2715347	1330053	3709355	1571656	2051713	2474314	1411001	2813791	3164014	1763764	3.90329e+06	578339	2788655	3716484	3.35625e+06	3.95594e+06
		N6-methyladenosine	37114	LC/MS Pos Early	213	2264	282.12	1867-73-8	102175	-	HMDB04044	2308931	1624833	605400	2998780	1220692	638473	1344653	1132180	971818	1761395	1130392	1631250	970280	1079052	1139562	644338	724474	1036015	1207034	1765449	1371775	1267810	740626	2867662	2289522	754556	1284039	1339420	1355960	1096948	1178183	2000736	2263955	632222	2098537	803413	2677700	1224927
		N6-succinyladenosine	48130	LC/MS Pos Early	100001664	1930	384.115	4542-23-8	-	-	HMDB00912	2438907	3341089	4699192	1941763	2408887	2116657	2464092	3742085	2320552	5340817	4114327	2567969	3.13959e+06	5377328	1.42176e+06	2571559	3567581	5204123	1943582	3.63837e+06	2.90095e+06	2369598	5201232	2229271	3587371	2260060	2.96856e+06	2779281	2500576	4361630	2616127	1621164	2.99921e+06	3714418	2.0318e+06	4289118	1878897	4053774
	Purine Metabolism, Guanine containing	1-methylguanine	32395	LC/MS Neg	100001133	1643	164.058	938-85-2	70315	-	HMDB03282	341499	325881	ND	327857	181211	127229	229696	199258	56720	508097	310590	293301	118065	252365	114680	173165	209669	655518	2275785	322473	144115	211335	179281	305809	286694	113467	210609	145556	82009	298611	225963	170241	206503	67038	153029	271642	225275	629263
		2'-deoxyguanosine	1411	LC/MS Neg	348	1751	266.089	961-07-9	187790	C00330	HMDB00085	128982	106559	ND	141878	62625	ND	107496	177342	ND	173646	149124	120869	65840	ND	63545	118768	68523	201533	98922	114786	ND	99761	92656	84023	80496	ND	74579	87562	ND	ND	89814	76331	76979	36892	104322	202016	ND	107149
		7-methylguanine	35114	LC/MS Pos Early	100001456	2175	166.072	578-76-7	11361	C02242	HMDB00897	125829624	155564416	251372400	161068816	78849728	85559584	129955320	158430592	57623240	196986928	177343648	117848904	130938336	167977312	120314256	111031000	124575264	226117424	202188496	124313272	98063232	105250384	144473856	135100000	110396464	58409772	159900320	113602944	66548304	131789688	148582096	100974888	136651824	110482680	133382088	157790640	117603288	205361488
		guanine	32352	LC/MS Neg	172	1330	150.042	73-40-5	764	C00242	HMDB00132	742474	1734544	3469342	1568460	1026569	98526	1.76678e+06	2639402	34513	1704082	669267	925773	1347945	513224	106814	504543	510410	1637968	1258674	ND	260091	1148681	534161	1290552	1405068	119941	1641874	1.02275e+06	ND	659384	591252	217500	442525	367984	764689	853986	1021623	1108426
		guanosine	1573	LC/MS Pos Early	1099	1728	284.099	118-00-3	6802	C00387	HMDB00133	889213	634438	354350	ND	956925	926208	ND	ND	79642	316026	466257	514671	946371	ND	244422	1343197	864424	320350	223037	459559	724355	586683	ND	333817	565059	858262	ND	ND	ND	148359	211018	573013	ND	370937	492950	2133926	493007	ND
		guanosine-3',5'-cyclic monophosphate (cGMP)	2827	LC/MS Neg	104	1593	344.04	7665-99-8	24316	C00942	HMDB01314	461332	614127	1085329	339354	124170	207080	407180	582579	256984	625211	367773	380447	588247	425735	159509	335406	314309	1073686	769598	343578	418979	427974	684151	171206	127218	146588	416144	ND	325920	342661	325559	297566	993357	343999	232241	368519	431020	836170
		N1-methylguanosine	31609	LC/MS Neg	100001122	1915	296.1	2140-65-0	96373	-	HMDB01563	3077992	5632183	16480482	5962577	3193438	2026384	3682118	7954602	1513244	9575959	9904986	5395081	4169313	5.83973e+06	1804542	3682030	4519012	12718973	3043154	3991946	3038295	5478513	9620435	4660643	5506433	2063860	3.50712e+06	5841151	1910400	3014637	5839967	2426793	5600952	2223033	3544752	7045639	4703119	7801637
		N2,N2-dimethylguanosine	35137	LC/MS Pos Early	100001412	2210	312.13	2140-67-2	92919	-	HMDB04824	62928508	77373800	43471744	73811232	49289796	36111216	80197688	82652064	29006308	97380952	82162288	68769808	70147072	98525808	47784872	57385588	86492256	82486336	70659904	75268432	49118184	77567072	35448704	77581224	67500488	39896208	76291432	75901416	32685516	70262536	77530016	59194240	79474776	60432132	62573936	81779840	89259368	65669944
		N2-methylguanosine	35133	LC/MS Neg	100001467	1988	296.1	2140-77-4	3035422	-	HMDB05862	2943655	5838545	9979293	5805440	2461832	2232793	4531580	8011661	1516600	6483947	6744996	4234529	4895676	3091615	1513221	3336394	3292062	7530045	3278183	3259504	2370189	4959352	5474178	4886135	3964303	2454872	3869009	4413433	1683896	2680176	5039303	1.9508e+06	4.01198e+06	2201551	3407857	5980391	3546209	4834512
	Pyrimidine Metabolism, Cytidine containing	2'-O-methylcytidine	57554	LC/MS Pos Early	100010895	2411	258.108	2140-72-9	150971	-	-	20457358	22270424	10238587	18503748	15288521	12078295	21983716	12444600	9617320	19413228	15663304	22545360	34333640	11505012	11272047	14169225	10717674	28864468	12113561	20964700	22748440	20978482	9294729	19906988	17521990	13514560	17581884	9221949	8019455	18513362	18612824	19230976	11144793	24430694	11541699	14780184	11519892	24416924
		3-methylcytidine	35132	LC/MS Pos Early	100001466	2176	258.108	21028-20-6	159649	-	-	5051527	10305977	10354479	9990871	5824506	6363690	10168087	8621052	3614857	12861265	11331224	7381373	16197878	9710253	9251387	9648230	9987480	10042654	5595337	7449075	6593164	9443569	7787633	9534399	5933426	4.10393e+06	13603765	7426496	3867982	8906397	11747702	7.99651e+06	6585756	14237061	11394895	12633903	8666987	8436916
		cytidine	514	LC/MS Pos Early	827	2124	244.093	65-46-3	6175	C00475	HMDB00089	1480720	2611784	529642	1107608	1416662	794494	1986719	2526362	1331045	1627937	1391702	1165975	2360155	906238	631650	615074	813051	2.2555e+06	ND	618315	1312172	2782752	644188	965227	1870448	832370	791145	1439660	912330	1287656	1081705	793789	959772	1864491	635228	1133426	732509	1944075
		cytosine	573	LC/MS Pos Early	881	2060	112.051	71-30-7	597	C00380	HMDB00630	1232486	6490525	1640866	1602752	1561982	1218211	846822	3255970	1887645	4984559	2126130	1551643	2623232	1236681	4509662	1010554	651033	2434161	961714	1653206	1470979	2972178	1931731	694510	1986219	1315022	852148	2803447	1138187	3.79752e+06	1247199	785538	1210683	2140971	1125698	1568466	585235	2208450
		N4-acetylcytidine	35130	LC/MS Pos Early	100001413	1580	286.103	3768-18-1	107461	-	HMDB05923	15650720	16893556	12213041	18613968	11700944	6553955	17701368	10040236	5644520	23174010	17828124	16213640	15574463	12721541	5330159	12259643	14287676	22563460	ND	13929761	7183408	14976524	8578640	20447480	14466378	7.92388e+06	13518641	8425667	8.31084e+06	10021692	13632352	10598236	15678734	7256413	11533563	22084660	12870018	15068220
	Pyrimidine Metabolism, Orotate containing	N-carbamoylaspartate	1594	LC/MS Polar	1108	3800	175.036	923-37-5	93072	C00438	HMDB00828	3.40736e+06	2.07774e+06	2.94743e+06	3.53837e+06	2.10627e+06	702577	1159362	9445882	481406	4639156	4.04903e+06	2.32918e+06	939857	5.24354e+06	802492	2.07288e+06	2400192	6.7062e+06	3.72239e+06	3.74229e+06	3.07456e+06	2.52525e+06	9832755	2.4472e+06	6653609	795030	929204	5641473	909766	2405972	2.36631e+06	1.05872e+06	4.05721e+06	1.19625e+06	826008	2.91513e+06	2.32801e+06	5.83495e+06
		orotate	1505	LC/MS Polar	445	1638.1	155.01	50887-69-9	967	C00295	HMDB00226	28959634	24106538	18722784	27958256	21228368	5917534	16198097	280618112	6157583	29160960	39655008	29392990	37728520	35768948	6917316	36554872	14255237	49189088	36851692	26877576	19233178	26806554	48027816	20566024	36061040	8438834	14614867	121682032	5.5469e+06	11872070	24580398	22697200	22697200	17391500	18815338	38607524	15329409	38897456
		orotidine	35172	LC/MS Polar	100001416	2250	287.052	314-50-1	92751	C01103	HMDB00788	11940410	13255958	17348552	14206842	11869040	3.92756e+06	9378035	209422704	3.46674e+06	19127298	12880167	6873101	6466262	19263280	8777916	12460885	17083474	17402392	11321224	18777326	13200272	11532926	14342638	12945068	17727970	4.14757e+06	8282039	185688368	8695898	11824674	13060235	5.46673e+06	14735071	8675826	7.75659e+06	15709231	14959220	19471706
	Pyrimidine Metabolism, Thymine containing	3-aminoisobutyrate	1566	LC/MS Pos Early	1114	2215	104.071	10569-72-9;214139-20-5	64956	C05145	HMDB03911	633306624	112006744	154031008	79284184	875770304	557426240	64419572	112493592	229040640	178061376	88332016	50592840	34327864	76425680	20625900	51196036	46974960	260522288	74097976	64648244	692280064	90040272	34555056	63484224	1227756544	605968832	120491008	72564560	169449152	75044296	60519848	71890632	96297280	28688262	61745208	56040240	51729524	143993520
		5,6-dihydrothymine	1418	LC/MS Neg	158	1637.8	127.051	696-04-8	93556	C00906	HMDB00079	331189	575236	1000898	716323	642771	353361	965459	878352	269221	1934589	1465522	647892	677905	696891	319498	489634	667206	1338661	838304	629096	297099	699550	727276	583142	1502656	343200	739819	473563	300606	705162	888193	375087	675722	457822	569678	704687	717784	927016
		thymine	604	LC/MS Neg	882	1654	125.036	65-71-4	1135	C00178	HMDB00262	542570	896219	226406	1066933	573048	325562	873921	1063701	283982	2464444	1430144	911919	627916	610870	338295	887962	360935	1512870	1317915	732003	425507	1107190	655564	1014925	662151	555944	749685	714575	335066	1099311	855754	582966	680389	451012	506651	1625246	387740	961430
	Pyrimidine Metabolism, Uracil containing	3-ureidopropionate	3155	LC/MS Pos Early	1053	875	133.061	462-88-4	111	C02642	HMDB00026	16045523	17597012	19991378	22213332	9189420	12034433	13951215	22002776	4.18934e+06	35866680	33528660	17635690	24995688	10202397	10060158	19190342	14629204	52281312	18321276	13278485	10672099	22760406	12543370	23842196	13219926	8897463	12851749	23110198	4865687	12953140	20604036	10682095	10338321	13272931	24111308	31565146	12544141	30712308
		4-ureidobutyrate	22118	LC/MS Polar	100000718	2217.5	145.062	2609-10-01	1571307	-	-	2.19595e+06	3.52186e+06	3.00564e+06	5.02124e+06	3.16147e+06	2.05391e+06	4.87152e+06	6298491	2.60837e+06	5136423	4221792	1.52825e+06	2.02539e+06	3.3982e+06	4.69993e+06	5.3731e+06	2.87906e+06	3469233	3.63223e+06	4972680	2.55236e+06	3827816	4.9666e+06	7935127	10011136	4365076	4739929	7.03588e+06	5.45682e+06	4350440	4.01858e+06	1.49129e+06	11513378	3.68728e+06	5895549	3658807	4.06054e+06	3.50257e+06
		5,6-dihydrouracil	1559	LC/MS Neg	1125	1120	113.036	504-07-4	649	C00429	HMDB00076	652060	1317699	1516510	1237658	784792	425759	1079460	1021744	389731	1466513	1300193	1122867	1096424	996368	308682	688862	813904	1832659	1484405	527558	447369	1251148	1093743	1084339	1514664	295001	1151272	680222	465158	579642	777782	540414	860849	662979	791871	1485619	827355	1029824
		beta-alanine	55	LC/MS Pos Early	244	1905	90.055	56-41-7;107-95-9	239	C00099	HMDB00056	16922480	3.1505e+06	2151677	3885879	4997827	428832	2.71692e+06	6269900	1284860	5538741	4.97528e+06	7530346	6590584	1.35356e+06	397461	4.46708e+06	377964	34986624	3.77081e+06	8.1548e+06	33329724	9764087	3158260	2.97644e+06	1.80116e+06	335637	3098769	333112	2410980	582428	7264293	3.80812e+06	3.41544e+06	4690993	456351	10432486	2.55846e+06	3.00413e+06
		N3-methyluridine	35135	LC/MS Neg	100001424	1944	257.078	2140-69-4	99592	-	HMDB04813	447170	805897	1530885	722520	454386	248386	536020	753927	203105	1166169	1193111	572935	570685	1021941	292347	629718	582444	1632611	575470	726667	410844	752224	1296869	639044	452417	331087	416442	714880	235645	305241	586870	371168	741716	289965	586411	1071577	608829	1251744
		N-acetyl-beta-alanine	37432	LC/MS Neg	100002102	773	130.051	3025-95-4	76406	C01073	-	5365300	8785027	12105952	13772700	5743860	5031057	7515459	9154025	3212685	19222412	16811208	4.81394e+06	9606344	19174374	5906739	8404106	4862065	33652792	9204006	4567182	6166779	8967353	9335745	12971832	5174994	5996712	6304604	5110078	3689915	8277399	11406679	2851052	18874736	6776981	7445820	14781878	5799408	29065288
		pseudouridine	33442	LC/MS Neg	821	1100	243.062	1445-07-4	15047	C02067	HMDB00767	148456384	173581072	272507488	175461232	142680064	89399712	138298224	222537184	64098356	275509344	271503200	148725936	148507872	226950992	79321312	147998992	137884464	289111392	202437952	174690720	135918000	189535136	223019040	175766112	151772752	83160776	124471456	150626448	64026480	119139352	208846016	97932752	249538208	103070648	121455912	241357104	137783456	214773728
		uracil	605	LC/MS Neg	825	1086	111.02	66-22-8	1174	C00106	HMDB00300	5809465	16039025	12348502	20330224	5.36234e+06	5372196	10029802	17548776	7432414	25159526	16647798	10174652	11887746	4520910	3347570	11290492	3.40351e+06	25906000	17108240	11423602	4898899	12627116	8638522	12676988	11881459	6400049	10335865	13869204	6078021	8967090	11401396	4794147	8056262	6423996	8750993	25168832	3341950	14536870
		uridine	606	LC/MS Neg	535	1457.6	243.062	58-96-8	6029	C00299	HMDB00296	720042	1.71886e+06	ND	881548	555070	500413	939162	1768051	494555	954684	803013	535617	1075529	577581	275968	710762	378227	1683629	1467064	655620	592663	1661891	347265	1086484	796985	662312	1150072	997483	487885	451719	814737	451370	646852	780248	415076	1393902	408007	989780
Peptide	Acetylated Peptides	4-hydroxyphenylacetyl glycine	43525	LC/MS Neg	100004418	1622	208.062	28116-23-6	440732	C05596	-	15682.5	107346	89560	ND	44259	124356	130506	76232	34859.4	324201	157636	96822.8	ND	524171	29242	176774	48841	426499	100425	169472	51499	119188	266310	12825.6	ND	108182	48119	64103	82302.9	230912	56401	69027	504773	ND	ND	270520	54963	251883
		4-hydroxyphenylacetylglutamine	55017	LC/MS Neg	100010850	1650	279.099	-	-	-	-	8.05642e+06	22403444	24155210	8080170	13911570	14335490	14681510	12435381	7125560	53345768	43887732	13703448	7454057	54484624	6817505	19738468	14865191	50747496	14101953	34272472	18241038	24755944	36731400	8514103	13209380	14354738	7563072	9816072	8.3274e+06	31265712	22267204	5994903	59742528	3747951	8656615	18160878	16775000	40640984
		phenylacetylcarnitine	48425	LC/MS Pos Early	100006108	3092	280.154	287108-21-8	-	-	-	285555	200516	ND	254356	ND	ND	1257704	1791725	ND	ND	975788	ND	ND	1213790	ND	273463	431051	387522	1006879	1280127	ND	201697	213121	322019	481825	191413	2198322	694772	ND	395354	ND	450212	812756	206058	107683	803687	ND	ND
		phenylacetylglutamate	52925	LC/MS Polar	100009045	2325	264.088	-	11579826	-	HMDB59772	15199161	17842976	23403422	7.43299e+06	10319002	5045594	4482847	8345283	8122499	11252524	11148111	13959872	7.39532e+06	18868870	3278214	3.17836e+06	12642727	15674687	18515320	24379302	11682094	26134698	50309936	5.09419e+06	12646730	11440127	4.4663e+06	6.70847e+06	9009078	7.96735e+06	6136903	7.80133e+06	29401166	4.52552e+06	4.35589e+06	3485161	10258203	12136660
		phenylacetylglutamine	35126	LC/MS Pos Early	100001417	2145	265.118	28047-15-6	92258	C04148	HMDB06344	1742332160	1766903936	1712698240	921784448	1424212992	1098270976	858745472	1092566912	1290808064	1298011264	1660523392	1448010368	1061098688	1513043584	811141120	773822720	1552116096	2135935616	1853475456	1864764544	1484586240	2060049280	2479515392	1075043072	1483771648	1653840896	824399104	931099776	1402862848	1312043264	1060914496	1340382720	2005469824	863538560	895285120	544100672	1494773120	1745393920
		phenylacetylglycine	33945	LC/MS Pos Early	100001275	2317	194.081	500-98-1	68144	C05598	HMDB00821	27453524	13082327	5760858	8866825	11535128	12725694	25704742	22549526	15786180	21178824	15205736	28703846	5474972	57989964	4569320	25446538	14898130	17892932	17184716	12620258	15102005	15571977	23353334	8723203	13626477	8160735	11567570	21672880	27158412	29200904	8926321	33673412	18736236	3.94324e+06	6887865	107387168	11613898	10495913
		phenylacetylhistidine	52926	LC/MS Pos Early	100009044	2909	274.119	-	-	-	-	24755536	23758592	21064520	13130689	19493590	9638917	7158927	16461507	13771818	11333929	26246164	21062864	9934042	12297721	5231736	11887755	20042096	17599482	33146648	25543056	19155492	36644180	45752048	18372082	26330812	29762554	6122482	11117396	18312482	16567356	11875787	16078106	16945196	7326736	6808589	6474279	17825822	22842614
		phenylacetylmethionine	54736	LC/MS Neg	100009241	3620	266.086	-	-	-	-	2742938	3454378	8570267	1544557	3757681	43229	238802	ND	134045	2260833	4742663	2547649	3.10149e+06	3784595	854453	1343557	2728978	7254853	2232831	1163396	3521273	5659285	18057868	1685184	1749096	689948	123290	114082	444368	3792558	1489091	2432368	822909	1591675	130651	748574	1661351	5.63552e+06
		phenylacetylphenylalanine	40699	LC/MS Neg	100003760	4260	282.114	738-75-0	47583	-	-	320823	278115	363002	107598	370100	163773	63132	261559	135393	382012	474298	229174	168395	303471	66992	122162	277448	497493	541011	315784	268687	393352	795609	153244	257198	380392	51623	173256	168254	277990	143900	161982	308157	109270	41094	69041	143391	351794
		phenylacetylserine	54911	LC/MS Neg	100010900	2195	222.077	-	-	-	-	6.52878e+06	12599800	11992506	2.9215e+06	8298517	3836157	2866085	6.75188e+06	6.05293e+06	4.85606e+06	6245928	10038467	4403068	6.45069e+06	1.52257e+06	2.94653e+06	5560359	9163688	13819249	8.22984e+06	5773049	11659151	19386802	2.42637e+06	5776975	9245293	3.27588e+06	4671394	7244773	5297702	2.96858e+06	7443987	7461853	2582420	2270227	1614681	4483083	5005765
		phenylacetylthreonine	54915	LC/MS Neg	100010899	2580	236.093	-	-	-	-	10607938	9858156	18474304	4583074	5107375	2509515	1535681	5122615	3872348	4041433	8784387	4913055	3876725	17349980	2144217	2284239	5914320	9213617	12411619	7557115	11414538	9530333	19229148	4902861	3849459	9466618	1455258	2256758	5323828	4280526	3155717	4941060	23959656	3065074	1869880	1474354	5.31338e+06	6080039
	Dipeptide	phenylalanylglycine	41370	LC/MS Pos Early	100003588	2898	223.108	721-90-4	98207	-	-	829735	1375847	1089956	2340935	682022	629334	842487	1011567	336760	1847792	1644104	1040721	1089727	1333089	839462	1545517	759626	1801398	775037	826818	917218	621596	1108781	1875060	934172	528912	970084	722155	721031	1404380	1124872	653801	878625	579935	1.03216e+06	1688641	995431	1423796
		prolylglycine	40703	LC/MS Pos Early	100003674	2136	173.092	2578-57-6	7408076;6426709	-	-	11544217	2664582	15653413	21198388	10387860	2587435	6121323	3316766	747897	17181916	20163738	6071661	3.56621e+06	6.90331e+06	2701279	12499087	12916396	12779034	6.90267e+06	4378154	10908745	2645155	18015196	15718908	6668988	7534675	4737141	1.79525e+06	1307122	7425863	12468660	4051921	9085872	4682989	1260885	9182637	8.13076e+06	6316216
		valylleucine	39994	LC/MS Pos Early	100003210	3138	231.17	22906-55-4	352039	-	HMDB29131	864910	857265	1889003	698328	225665	294156	669971	1075573	307827	1563191	1747679	959972	606335	790596	280153	703316	566300	1826260	842499	1217455	658527	1403299	1212625	1.00439e+06	220593	479948	589592	1081915	405819	861649	1291181	429948	ND	484564	518123	1481194	320109	965608
	Dipeptide Derivative	anserine	15747	LC/MS Neg	100000044	1124.8	239.115	10030-52-1	112072	C01262	HMDB00194	27903408	ND	27033100	1674415	12719777	ND	1.03575e+06	6755585	1.30341e+06	835233	15614132	51439300	5031456	4760626	109238	4278701	ND	178184688	187008	1357454	14469240	447639	8018547	1771217	1.00831e+06	ND	2955786	87693	7.0533e+06	ND	19446212	4736630	11857102	11661049	ND	2497112	158117	2.65029e+06
		carnosine	1768	LC/MS Pos Early	249	2942	227.114	305-84-0	439224	C00386	HMDB00033	43433440	5.76775e+06	7954027	25522296	15788358	2627600	25160222	47196388	4074853	46378704	102671096	45451820	18967442	53714604	11450699	72042568	9234272	208283520	8876265	43114600	33886392	8076153	46598812	17366188	16363911	4465139	23554824	10175568	4391109	17117216	38910604	25256532	18681184	19111056	6641073	93669344	17620864	22688360
		homocarnosine	1633	LC/MS Neg	41	820	239.115	3650-73-5	10243361	C00884	HMDB00745	324625	1008249	3027577	740488	372254	266356	1352685	1684710	343356	3178807	3.12328e+06	1275964	760131	1800916	732441	1.67843e+06	596571	975917	785332	731037	304207	781033	944124	1763097	470967	387429	1077826	727801	343305	688573	790732	753241	781558	620472	1172977	2.02432e+06	813995	630745
		N-acetylcarnosine	43488	LC/MS Neg	100004046	1235	267.11	56353-15-2	9903482	-	HMDB12881	4523601	7729712	39137564	18710944	12775635	6204518	16246639	24897468	2275672	24351778	24136808	7.44512e+06	7.1569e+06	15307275	5538135	25913868	14121843	33594124	21929270	16170090	4437319	9558177	33034904	15058406	15796728	6684279	14648406	17280516	2447853	10031356	18810988	3797747	14834348	5934587	6310002	35961336	13963862	20599368
	Gamma-glutamyl Amino Acid	gamma-glutamyl-epsilon-lysine	33934	LC/MS Pos Early	100001262	2717	276.155	17105-15-6	7015684;7015685	-	HMDB03869	114387	1310354	ND	88984	472324	348833	1344436	1367222	873371	2551812	265341	309291	847482	833303	274583	3139091	ND	3072230	906794	ND	401378	1.04509e+06	516748	ND	384575	867606	886317	383197	1239533	1256338	ND	404106	1590309	864605	223238	3693971	ND	1455562
		gamma-glutamylglutamine	2730	LC/MS Pos Early	1140	1430	276.119	10148-81-9	150914	C05283	HMDB11738	136900	497947	545301	184962	161107	193872	378494	91142	ND	390224	410705	236857	381447	562419	170902	161403	367036	991697	491017	ND	125567	460230	502044	321394	ND	197855	348428	ND	ND	ND	ND	290194	586339	206869	199161	220125	203878	529673
		gamma-glutamylglycine	33949	LC/MS Pos Early	100001294	1535	205.082	1948-29-4	165527	-	HMDB11667	1282546	3988107	1151104	1.00011e+06	1782096	1190433	4991970	2.94848e+06	2878267	8468952	2437657	1819873	2750137	3539770	1931065	4227116	944887	8.28754e+06	2835524	1233421	1778838	3.89144e+06	2303108	1332425	1298681	1759920	3363894	1248557	3809901	4371511	1439656	2523134	6291308	2111703	1.55216e+06	6541840	686993	4466978
		gamma-glutamylhistidine	18245	LC/MS Pos Early	1235	2740	285.119	37460-15-4	7017195	-	-	245187	1220584	ND	320306	480337	250958	1168518	836657	392870	1896470	443060	560111	699181	611691	393557	2191292	115410	3.0663e+06	ND	242575	272232	1494989	ND	611416	ND	562317	676042	368930	653993	839632	371883	587304	1.37748e+06	661460	334124	3264041	222101	1712940
		gamma-glutamylisoleucine*	34456	LC/MS Pos Early	100001485	2940	261.144	-	14253342	-	HMDB11170	10051350	11839407	9132592	13977255	16529669	6186145	15924085	12289570	5161250	17706152	19290424	7298070	10672342	11438072	9672322	17521296	13274340	15171035	10745467	4144464	13541684	9896716	8010922	17416648	10755310	9508983	13536538	7.57509e+06	8088022	13815003	13103774	9807762	10969799	12993078	7973996	16938840	13306311	15757729
		gamma-glutamylleucine	18369	LC/MS Pos Early	1268	2991	261.144	2566-39-4	151023	-	HMDB11171	167495	697331	105538	335561	573248	ND	1041550	1042204	379213	1527332	389809	263876	446438	584435	395361	2344650	108119	3003103	895128	ND	268972	702006	ND	509429	254896	648971	841830	333292	628952	890803	248084	529246	988014	796047	320798	2.9645e+06	114956	1188185
		gamma-glutamylphenylalanine	33422	LC/MS Pos Early	100000491	2992	295.129	7432-24-8	111299	-	HMDB00594	764699	1884593	541927	595169	1168714	584549	1551008	1852248	538855	4072942	1380996	815690	1065530	1414549	898337	2482168	368274	4250108	1538310	391670	939220	1678821	967627	850574	975543	848297	1102058	864025	880624	2251956	713100	881457	1.96421e+06	1134233	675861	3343932	509191	2447884
		gamma-glutamylthreonine	33364	LC/MS Pos Early	100001314	1750	249.108	5652-48-2	-	-	HMDB29159	4.12821e+06	8079988	2778794	3359381	3200022	1802160	5119655	4683105	1971246	10075994	3639409	2451346	7103643	7419721	3679629	5413377	2755456	11387309	3573732	1896621	4045606	4701552	3100872	4485927	2135733	2966573	5145994	2171822	2584836	3462902	2503650	3509012	10097487	5849195	3593860	6429675	2395997	7769009
		gamma-glutamyltyrosine	2734	LC/MS Neg	1102	1240	309.109	7432-23-7	94340	-	HMDB11741	67193	180460	ND	ND	128710	79382	248545	283928	126109	527882	ND	54200	150663	78245	135523	528093	ND	707698	319345	ND	109480	196886	ND	120782	ND	169648	184769	67590	166421	236426	41328	123950	180736	148131	63799	677638	ND	284142
		gamma-glutamylvaline	43829	LC/MS Pos Early	100001126	2700	247.129	2746-34-1	7015683	-	HMDB11172	20052448	22152268	18176224	29182520	26628142	14035539	29251556	23887392	15117708	36631480	29537356	15774648	27643220	23776570	21049608	40326644	25899872	41823872	22819980	13224554	23170996	22528320	21654238	33230350	16339995	25714088	30569350	16840112	21635092	38038608	21213006	20957780	21455704	29783556	16554000	35931792	22495312	27746110
Xenobiotics	Benzoate Metabolism	2,4,6-trihydroxybenzoate	35892	LC/MS Neg	100001718	1574	169.014	83-30-7	66520	-	-	298221	655174	642246	537267	709314	378888	1164813	650343	188385	29911308	12020826	90212	4062865	8551089	1120924	5053324	1373119	2385678	1243933	183182	374208	1408150	746926	906620	1066501	342451	2890847	1067370	55403	1738693	5475316	359397	7038618	988645	2559486	3312625	1359070	3987012
		2-ethylphenylsulfate	36847	LC/MS Neg	100001809	3416	201.023	-	-	-	-	69349	1356415	431482	528033	29188	37176	29977	190514	118588	134283	213203	ND	77267	ND	33648	ND	138322	980633	68935	150408	33030	1107056	2538217	450640	102888	34916	33756	ND	111843	ND	362974	ND	ND	125266	52992	186190	50949	167515
		2-hydroxyhippurate (salicylurate)	18281	LC/MS Neg	1869	2184	194.046	487-54-7	10253	C07588	HMDB00840	1944592512	51940252	38088328	466991904	550856704	972287296	142290880	573219776	378019168	153832288	180215168	46134248	267118304	135452528	643487936	21849480	2536786432	81564736	31096600	28541036	66807756	3377394176	161585520	418709152	4248812032	3448427520	91594264	274183072	534350048	43214960	160764064	33111954	85381152	81928584	1101484800	60697020	1917387776	59802124
		3-hydroxyhippurate	39600	LC/MS Neg	100002122	1687	194.046	1637-75-8	450268	-	HMDB06116	126985544	195796160	119487456	266341472	220574640	583657536	293561504	353610144	210923520	525190720	138879264	108798464	269850304	264454528	706483840	16505669	195543696	1384497664	600084928	468606496	44135648	585171904	306150752	171836656	295253760	59313104	342505632	391032704	83778064	310695232	112773512	131579952	231349632	300819328	1264228352	29537348	306998752	747016320
		3-methoxycatechol sulfate (1)	48763	LC/MS Neg	100006375	2163	218.997	-	-	-	-	15041201	15551639	137181504	4968713	11034085	56188488	13506788	18781960	17677432	784767040	58860396	7871102	29634310	19936348	33423636	13714620	63256644	55515584	7510912	28115388	12054296	62744724	119339968	7542711	53313772	165726784	65368920	35644096	15337719	373828000	79810400	6.78031e+06	37231356	15822256	50159724	47389104	82806752	69118816
		3-methoxycatechol sulfate (2)	48752	LC/MS Neg	100006376	2200	218.997	-	-	-	-	4896730	10718786	3391444	737569	3611641	3239660	4213089	3596463	2642386	12132031	5900992	7992158	3.09331e+06	7168146	2106403	1.3592e+06	2080131	17747840	3487473	7302537	7025902	11635656	9464795	5003417	8828858	2813517	4006370	4128551	2505359	6893250	7387282	2658996	4838704	1849624	3774112	3683096	4067919	10376689
		3-methyl catechol sulfate (1)	46165	LC/MS Neg	100004112	2790	203.002	-	-	-	-	19607128	12296689	73687936	12280149	11998422	27886192	5757566	44261136	17546236	3638990	10004564	3042332	1813095	2975463	13440034	5897974	13980774	93415560	18432592	30681948	8.37021e+06	12333143	137627072	22205236	30355876	2541833	6926078	16232283	24643920	1297805	7324948	2826203	4952527	2356681	16956104	22974750	6222238	67978296
		3-methyl catechol sulfate (2)	46164	LC/MS Neg	100004110	2860	203.002	-	-	-	-	1116471	545157	2420687	613685	924413	2432416	375975	2697566	1186939	316025	817803	177403	89326	172875	643487	390347	611394	6000404	1415563	2759821	299067	1077172	10038924	1088282	2476649	197753	400647	766536	1708083	50802	592199	155885	353125	172872	905685	3487842	249486	5161940
		4-ethylphenylsulfate	36099	LC/MS Neg	100001756	3580	201.023	123-07-9	-	C13637	-	3034385	12805399	3231930	4556642	3119209	8558373	3664138	3105525	43778752	3519369	4.07284e+06	3608180	5089969	3599474	1054614	1066415	3122805	29551260	35933976	3131410	4596003	15878088	5167526	2560952	2876447	4.15023e+06	7438310	3062666	7754286	1244678	2309123	4122526	3900138	1807861	1123800	2091437	748918	4958994
		4-hydroxybenzoate	21133	LC/MS Neg	100000862	820	137.024	99-96-7	135	C00156	HMDB00500	4.04103e+06	2134467	1147922	3.32761e+06	1827593	1263808	1464678	4918554	2087877	2290306	3203118	1726793	4016482	1167963	2593563	3719836	2810796	3.70799e+06	2348521	8120999	1494260	6025320	1883860	2582117	4447383	3961570	1495059	3326086	2563553	1170359	2463043	1665238	3.52388e+06	1771533	31795944	7.06644e+06	4925772	2750442
		4-hydroxyhippurate	35527	LC/MS Neg	100001423	1475	194.046	2482-25-9	151012	-	HMDB13678	143255936	115587320	115524944	92414240	55837996	98923784	126682360	112260480	102603496	424968384	315917088	155076096	331308800	164665680	223179712	290707776	192483136	350518336	153658336	710998912	66262168	245467040	189950192	105998672	159587424	138625376	68635864	99331528	98397840	343111264	151373696	82191520	157216464	157921408	1778173184	244624688	252415888	306256288
		4-hydroxymandelate	1568	LC/MS Neg	1115	772.7	167.035	7198-10-9;184901-84-6	328	C03198	HMDB00822	11268145	1328528	7014095	2054779	7353757	2906698	3.95979e+06	9202538	3054788	9709835	12625964	3582171	4802079	7201984	5.38556e+06	19101840	4996936	15629965	4851518	4836398	5928299	3.16803e+06	9911297	2926207	10267427	5038227	3294041	9739328	4.17866e+06	10489930	7662049	3661081	4727757	3346079	3662010	41897900	2436886	9125275
		4-methylcatechol sulfate	46146	LC/MS Neg	100004111	2665	203.002	-	-	-	-	191472704	94839440	325695008	419276096	195633872	73861920	78803592	129725872	89830488	252036256	284621792	185230976	109490120	193085408	48636688	12280677	238379840	206895168	80227232	74071368	122651176	214195072	288274944	148031024	80826400	203128432	95429936	83072696	87003568	146550096	188950256	194783344	271502560	101984600	70051624	40341384	186287264	201656688
		4-vinylphenol sulfate	36098	LC/MS Neg	100001755	3320	199.007	2628-17-3	6426766	C05627	HMDB04072	8699751	36633368	25626358	6264615	54432780	4497548	77149720	5863475	25378672	51688516	24349176	33347426	30373554	115416704	7601721	17829100	4863230	92542424	18535012	119050896	15856481	87743136	16562726	10855314	37772204	4991165	58362096	6.8153e+06	27381948	29196822	17950864	5978951	15962318	11882264	60436388	51251384	6876077	34498072
		benzoate	15778	LC/MS Neg	100000008	1750	121.029	65-85-0	243	C00180	HMDB01870	83058416	1066177	ND	1248009	ND	504517	646511	4059859	2697512	4199341	ND	926759	ND	1477195	ND	940137	1061069	1426976	9197020	5778487	1667431	1280206	9896773	1654318	3807125	931462	1070202	2392479	2556531	ND	ND	635703	3684454	ND	1638603	1183269	2216527	4388362
		catechol sulfate	35320	LC/MS Neg	100001605	1906	188.986	4918-96-1	3083879	C00090	HMDB59724	440859616	341412928	504263616	343611328	239941824	225095184	320118944	606850624	368536576	1164964480	459585184	297077056	261145968	502137952	238295744	211520960	94765016	834962048	382968096	330410624	199331968	614517504	693569344	351139872	595970496	115011744	406002944	395601888	339187936	271687040	396270816	243036224	600276736	148187312	474088064	291894816	193136304	631408448
		hippurate	15753	LC/MS Pos Early	100000014	2116	180.066	495-69-2	464	C01586	HMDB00714	2940608256	1638524032	1050828096	2380235776	2032351232	1956933504	2331355904	3236328960	2273414400	5547474432	2228385024	1918572288	830078592	1985171456	1280165504	921115072	1767551104	2020136704	900596864	913590848	1278217472	3155992064	3497167616	1970384896	3968191744	376114624	1789421824	3116063744	1869955840	1467854208	2631566336	1669472768	1899667584	962830592	2275878656	1010607360	976022720	1168812288
		methyl-4-hydroxybenzoate sulfate	48429	LC/MS Neg	100006116	2873	230.997	-	-	-	-	2334057	5045368	9881721	42467052	8657714	9959461	1203471	10497748	19730634	7048431	11226185	3358540	14953321	9406133	888725	354795	1119033	7187417	1930894	177009	1914715	9434256	5452206	34307424	36242600	6662578	1683023	3.64439e+06	37925152	681308	2331421	837662	11389173	1319041	16598448	1084907	5238718	722403
		O-methylcatechol sulfate	46111	LC/MS Neg	100004208	2344	203.002	-	22473	-	-	111455832	149690496	210173504	57488636	111864168	74814552	125385360	129418472	95267600	226712032	100618136	67063628	68908648	123753200	66502008	54180080	45002976	185435168	131854000	148841984	52131820	224216048	334632384	65460672	214866832	46433812	136141344	84130128	97773952	61171044	63343564	73434416	162950272	45960352	119732808	84644320	70798360	151926208
		propyl 4-hydroxybenzoate sulfate	48460	LC/MS Neg	100006264	3971	259.028	162338-10-5	-	-	-	77332	128591	730890	8001890	740365	411541	7506787	425112	3596028	310935	2277065	777243	3239784	202244	ND	ND	56710	118880	184184	ND	43520	228481	533307	5666949	4350439	436197	4011106	133442	17667596	ND	576829	236790	611863	115076	1594444	ND	1549416	95415
	Chemical	1,2,3-benzenetriol sulfate (1)	48761	LC/MS Neg	100006373	1453	204.981	-	-	-	-	3617588	708697	3778013	207243	593324	10280498	3415082	7086063	2074785	361364448	27368668	199056	8966509	8113884	1672332	5465408	14643525	8032986	719904	7574181	4399138	12368490	2753415	719239	ND	31036512	12353146	2713064	2383988	140831376	31250996	377069	9106103	8193869	9674918	6.91516e+06	23000624	12589373
		1,2,3-benzenetriol sulfate (2)	48762	LC/MS Neg	100006374	1709	204.981	-	-	-	-	61160168	23752080	292080384	19030012	18312024	155725536	23679744	49226808	40553784	2595937280	346728416	6574558	106311864	152437952	40164036	66234604	136215904	181746336	39444840	108377256	65405676	131215568	96930864	21048916	49970616	338377216	161715520	56912236	62051888	1357485568	379392800	12969570	191368832	104592120	136542448	91499216	221747744	313771872
		2-aminophenol sulfate	43266	LC/MS Neg	100004322	1677	188.002	-	181670	-	HMDB61116	19852236	44731952	208568144	4772254	16698842	24390064	57245252	36181908	10177425	12189839	64820516	20990308	28781390	87304528	31128452	6128186	14428425	147728224	27176942	11448821	64905012	97147488	210696832	14571872	9579961	629646	43572984	45597180	8966158	7.74631e+06	25852378	13929846	73498568	14073288	60155408	12299915	24254394	81482232
		2-methoxyresorcinol sulfate	48445	LC/MS Neg	100006184	1863	218.997	1446269-78-8	-	-	-	7458322	1568675	10168634	1043758	1669868	33443700	1187009	3184758	2278875	814423040	54032340	419078	19208336	40837896	3809084	5330265	51576892	10488397	4777808	15516787	8211200	18172096	4.43614e+06	1910453	4599509	92347160	18153664	7107074	3493150	286752032	73121440	864491	50285100	13107240	19828406	6210872	63111120	21465714
		2-oxo-1-pyrrolidinepropionate	40452	LC/MS Pos Early	100003265	1600	158.081	77191-38-9	3146688	-	-	9607573	19906304	8410527	11136977	11101707	6799903	10857823	11818460	5.72922e+06	17099044	29168084	11803096	5998228	12479571	6439858	9120020	5495678	5321077	12994109	13348284	9333843	15381802	12163803	6611157	11799297	4045856	9578094	8.2828e+06	4040163	6548049	44364216	7228874	15011891	4938353	8052021	11621268	7163338	13508081
		3-acetylphenol	42983	LC/MS Neg	100004099	3400	135.045	121-71-1	8487	-	-	ND	246107	230577	ND	151327	671630	305315	333628	ND	755151	ND	ND	255724	216905	657842	ND	279296	1792973	412122	534034	ND	618565	371384	ND	351263	ND	642322	294379	ND	243884	ND	113642	ND	446235	1590742	ND	233706	929389
		3-acetylphenol sulfate	48693	LC/MS Neg	100004326	2477	215.002	-	-	-	-	1.37173e+06	4789789	4150207	2287144	2692319	3341004	1.00736e+06	3570702	2393601	829769	3.91268e+06	901648	1226150	4305247	2316187	304976	1177925	11404916	11330956	5010648	653646	4414997	5519424	1286601	5.40109e+06	1397700	1099558	1.71124e+06	2844670	370862	1546542	957478	6477485	916567	5027637	905486	1.39236e+06	6798729
		3-hydroxyindolin-2-one sulfate	48419	LC/MS Neg	100006103	2082	227.997	-	-	-	-	11682446	7326163	12324361	7321911	8586767	3.74477e+06	4196121	6863560	2690054	53942884	8155851	6959242	10173114	8193374	2617941	2975469	4957459	15454377	12914977	10455227	6068379	17070084	37058000	5362539	15494278	7483799	4346208	3409048	4012444	7.7384e+06	4791371	4.1412e+06	9038026	7254434	3792938	3.73682e+06	5349229	12356363
		3-hydroxypyridine sulfate	48448	LC/MS Neg	100006098	1595.5	173.987	1955-23-3	-	-	-	76000176	52617684	115904568	35882952	94395384	152201056	17310968	142150352	110862608	25513032	111102376	26429360	2.07003e+06	23776442	66921552	27896114	1691329	454712320	131693280	158718544	33383392	61860592	102755976	24702628	139232080	4915425	24357804	54653372	173234272	7019021	29805414	18151172	23162208	5199072	61120808	23411940	6634905	94088632
		4-acetamidobenzoate	57585	LC/MS Neg	100009413	1403	178.051	556-08-1	19266	D03836	-	1349820	1507501	813220	ND	631955	ND	2048201	4771055	4403424	632236	2943251	2261603	1084671	ND	1253010	ND	ND	2248860	ND	1111784	981920	1729587	706809	ND	1483262	1.72285e+06	4377050	1728989	21849462	1662499	713575	854565	1230245	319419	396052	1472780	ND	1167915
		4'-hydroxypropiophenone sulfate	48461	LC/MS Neg	100006269	3012	229.018	99179-84-7	315296	-	-	169445	263040	601862	685169	324568	253037	427322	896735	1085391	1143049	1430959	418898	388721	1333502	3032430	2309529	207477	2132178	555213	693263	493189	1273347	1357948	429849	1287980	146274	1747475	3011964	1081289	1536485	2.03008e+06	354841	1587632	321572	1404921	1856023	174942	1462901
		4-hydroxypyridine	21126	LC/MS Pos Early	100000825	2308	96.0444	626-64-2	12290	-	-	2865736	1312625	6134357	1359379	4150520	7395589	624061	12172485	4980747	208995	530215	1100776	ND	870934	2705255	921037	ND	19419162	17164152	5036048	2348530	2049917	8872120	1396974	3.71684e+06	ND	812958	7.00598e+06	7.39736e+06	980487	302609	699326	312591	419737	4.14795e+06	ND	910454	3292153
		6-hydroxyindole sulfate	48698	LC/MS Neg	100006260	2498	212.002	-	-	-	-	6758441	6283337	37108844	18968188	9655723	2746208	11851097	6362843	3535479	37499752	9213668	5677469	13305681	20140642	6695121	8.03672e+06	13877837	46742932	31025130	37088872	1856588	6767368	52858872	19801344	12502072	9252513	10479097	6259486	3.85267e+06	18771960	5315440	6630660	32227076	11149675	13857795	8538338	22150170	31268308
		azeloylcarnitine (C9-DC)	52943	LC/MS Pos Early	100006630	3149	332.207	-	-	-	-	11097356	10204649	26090720	5491767	3.96693e+06	11149588	4526628	14342527	3341257	20418358	26810248	7.46761e+06	21111850	4326254	3324866	4733860	5895528	22173030	5186918	8268906	10503064	6972734	17643272	4886773	6176851	7.28832e+06	9263637	8813921	3964745	8763467	11000010	3.62141e+06	3082952	3389354	3131384	10636976	6329027	8.13779e+06
		benzoylcarnitine*	43265	LC/MS Pos Early	100004555	3041	266.139	105450-08-6	-	-	-	13736978	6644544	44797664	15239228	20976508	5231113	5172083	25163668	3829682	11687618	13667568	7544095	2824104	4359113	8.17389e+06	3773861	11087726	8851830	5505589	7095166	5871396	8504158	40109264	11776383	27313312	2829229	6449933	22650952	3722365	4367433	11025743	4591937	3840480	2773897	13513740	6004941	6826949	5111311
		diglycerol	40700	LC/MS Pos Early	100003700	818	167.091	627-82-7	42953	-	-	8732745	19052468	58334784	15599394	9390035	12287476	14560896	81490792	3348268	16147128	26238982	9865230	5287118	25465084	7732590	12630928	18113356	38657296	14729821	23632300	8361561	25683986	79089864	19672272	35870468	5125105	9273077	24861922	6283446	9056547	21282756	5228462	32180248	3547390	9195722	21442776	14337514	60825616
		dimethyl sulfone	43424	LC/MS Pos Early	100004284	832	95.0161	67-71-0	6213	C11142	HMDB04983	1437934	1.03502e+06	2102790	1373939	886789	440503	2471718	2.05797e+06	699625	833361	2440151	772187	1447319	1056999	454334	931132	817874	1424911	1756593	7631021	1590376	4288933	1931816	1467764	2991492	937686	1993799	1.97086e+06	527199	302166	1952039	2610526	4688633	1856165	917089	1552312	1745999	897900
		ectoine	35651	LC/MS Pos Early	100001635	1980	143.082	96702-03-3	126041	C06231	-	109125408	8757561	16314067	38373768	41933888	9167769	26204956	32499324	31751380	12021434	49716768	13847094	30608632	15536562	13587234	10213996	8276293	107716296	29547796	29949164	23517892	43266092	48941464	22547404	16854168	10368243	11900728	16611818	7382653	5053561	144870704	6138742	47384368	38526320	12259253	10047201	6776627	21929156
		ethyl glucuronide	39603	LC/MS Neg	100002849	793	221.067	17685-04-0	152226	-	-	603725	400627	ND	23558982	ND	236438	ND	811512	ND	128292496	143034160	184758	256796	403273	555357	ND	ND	38282348	ND	11048008	ND	411983	ND	29526918	567100	ND	ND	13214743	ND	381656	137538672	ND	ND	ND	162972	ND	494226	56553592
		gentisic acid-5-glucoside	48729	LC/MS Neg	100006372	1434	315.072	1820-89-9	10914066	-	-	1423590	207506	964840	506907	668382	282848	298775	1313942	343102	5294273	8221950	3440237	281768	5924341	5791298	871125	628509	1497461	149306	1027372	705391	201605	5830526	517416	971751	464990	564921	1432460	204341	610577	3125339	199647	1282470	544861	ND	1166307	334266	1214796
		glycolate (hydroxyacetate)	15737	LC/MS Polar	203	1790.4	159.011	79-14-1	757	C00160	HMDB00115	337635	1.32225e+06	437822	1.98918e+06	198987	103840	378936	779081	ND	2.55262e+06	1.7499e+06	542971	276646	704303	130318	1.35755e+06	1.62404e+06	7058900	934012	194974	180516	2.2878e+06	1.3764e+06	934012	229711	156201	247160	ND	68750.4	522965	863899	65583.8	1.68743e+06	414936	250136	1.77675e+06	1.9652e+06	4890256
		lanthionine	42002	LC/MS Pos Early	100003892	1730	209.059	3183-08-02	6994972;98504	-	-	7889186	12910410	19751476	4780970	10169537	4784757	8420502	9727713	5339690	27036408	21736060	10350638	9510324	16964740	9262077	10375538	7929271	21212848	10956266	10066172	11278490	16505739	25862520	4906999	13146372	6795897	10369711	6973416	8165595	7809604	11224199	8831659	14762201	9724833	9124530	11009360	10635900	23787116
		N-methylpipecolate	47101	LC/MS Pos Early	100005383	1932	144.102	41447-17-0	11862129;11286529	-	-	223533504	166661248	1038712640	200766016	187802624	158745696	137003552	932169728	348821440	566168512	368897792	150285232	200699968	300681408	389516256	835090112	678032448	535576608	290019936	234703568	184854912	196709408	881591040	182204464	229746896	116335280	136138704	825415104	438028096	385324960	229561328	106081432	202289376	182862368	567620032	1080624768	678283392	373584128
		nornicotine	38122	LC/MS Pos Early	100002224	2947	149.107	5746-86-1	-	-	-	ND	10217507	ND	ND	ND	ND	ND	ND	ND	ND	ND	ND	ND	ND	ND	ND	ND	ND	ND	ND	ND	8323361	ND	ND	ND	ND	ND	ND	ND	ND	ND	ND	ND	ND	ND	ND	ND	ND
		O-sulfo-L-tyrosine	45413	LC/MS Neg	100005384	990	260.023	-	514186	-	-	32211868	64033456	75905264	67656024	31718934	25883690	34180168	56880572	17938228	133224000	120689344	51960536	53481356	60220232	21873396	44003404	40815760	109700464	93839400	51710336	33717568	58486300	68147072	60187332	36302680	28528732	35606168	41852508	18520318	56381344	84865592	26984024	59530392	29511486	36118584	71008112	37227600	69857856
		S-(3-hydroxypropyl)mercapturic acid (HPMA)	44552	LC/MS Neg	100004568	1576	220.065	23127-40-4	3371179	-	-	3230324	3358065	6.49758e+06	2204292	1719592	803671	4071899	ND	395952	5390654	5094225	1910144	3.60846e+06	2144483	7662991	1662412	1354279	9826184	880613	2764255	3524151	7454457	6648151	2052145	2299337	1075481	885488	579063	275639	1776337	4150438	766828	3206342	2111531	1631619	3.63854e+06	1658590	9793183
		sulfate*	46960	LC/MS Neg	100002528	616	96.9601	14808-79-8	1118	C00059	HMDB01448	789159744	1114897792	1347652608	860194368	867032512	432923424	837377024	874740160	290745120	1174119168	1369764736	885648512	684424576	974661056	541729728	918556416	715410816	1431358464	513233888	854853696	1025860864	721328256	1306484736	579882240	558746624	581766400	777973056	784249088	644118336	802595072	1065813248	575498880	882858752	780634688	503764736	988918784	669074752	1236878336
		thioproline	53231	LC/MS Pos Early	100009232	1250	134.027	34592-47-4	93176;6973609	-	-	767549	700649	1597166	815730	602759	160157	1154315	ND	ND	1073887	1293811	1034043	434832	848765	856248	967977	1104890	1920559	1496487	813098	793500	330647	558628	1055524	575769	200249	1370702	147215	ND	546643	1071572	820872	1776429	887958	1142079	2182457	1635504	1.80784e+06
		triethanolamine	22202	LC/MS Pos Early	100000989	1963	150.112	102-71-6	7618	C06771	HMDB32538	11508373	9417015	1673477	4037863	58078032	2820979	8265679	3362704	2742960	1594296	1886251	11908940	2573344	2456897	3523156	821889	3024234	13050972	5726972	23977028	11961003	6955006	785561	4357190	6661884	3.18284e+06	7948498	2816131	2238152	1216117	1722848	5810523	2466563	2253884	9367973	939656	2655299	6172110
	Drug	2-acetamidophenol sulfate	48580	LC/MS Neg	100006190	2251	230.013	40712-60-5	181671	-	-	55572976	69008096	41134588	2364304	14516817	47343728	43881044	45699940	24345360	55804992	176491872	44856252	78271232	80787352	8521478	4382198	11854437	161404416	24147070	11884023	140683568	130550920	148140912	12515685	8961646	1058147	39262216	85165280	23829938	33966400	55610816	23819416	75575488	21227570	39966540	5831021	27089952	116420272
		2-hydroxyacetaminophen sulfate*	33173	LC/MS Neg	100001791	1674	246.008	-	-	-	-	1081280	719608	2187109	1172248	64334552	329084	1.03964e+06	312505664	323056992	ND	2694054	976201	1576884	63586648	10532565	163080	198332	1493680	517648	552845	4762433	4241564	1900126	2128554	343318144	586275	1441575	259559104	373830784	8161345	2953740	955926	1207972	705251	848178	147253	248252	179336592
		2-hydroxyibuprofen	43330	LC/MS Neg	100004169	3462	221.118	51146-55-5	-	-	-	ND	64906752	ND	246712	ND	ND	ND	ND	246017	248054	ND	ND	1945300	ND	ND	ND	ND	124144	ND	118501	ND	ND	54819100	793271	ND	ND	ND	418799	405939	136528	ND	ND	396065	ND	108410	ND	ND	1206140
		2-methoxyacetaminophen glucuronide*	33161	LC/MS Neg	100001795	1633	356.099	-	-	-	-	ND	ND	ND	60672	6268751	25511	ND	77601960	23444780	ND	113432	53017	ND	11534329	482430	ND	ND	207090	100278	ND	304716	138709	124688	118716	65783884	ND	74413	55217564	26670864	357645	44031	27204	140585	ND	57872	ND	ND	46197564
		2-methoxyacetaminophen sulfate*	47031	LC/MS Neg	100001793	1949	260.023	-	-	-	-	ND	ND	259616	ND	14508368	ND	ND	81118872	92952176	ND	289921	ND	310444	10756153	814257	ND	ND	ND	ND	ND	524454	420985	106650	245074	253068608	ND	62714	72968552	117083680	1052209	94558	ND	ND	74825	ND	ND	ND	51316116
		3-(cystein-S-yl)acetaminophen*	34365	LC/MS Pos Early	100001797	2420	271.075	-	5233914	-	-	1174059	161530	ND	472450	43815360	114271	153062	266817440	224307760	ND	ND	180502	2020393	63165684	3747387	205454	ND	214963	362597	362265	674782	188196	463509	291069	414425600	ND	115818	166679296	288164960	1.72516e+06	ND	245590	1403773	607644	1558715	ND	ND	156880624
		3-(N-acetyl-L-cystein-S-yl) acetaminophen	45721	LC/MS Neg	2048	2094	311.071	52372-86-8	83967	-	-	598333	133883	382511	445099	40230048	ND	60894	277380832	174185504	ND	ND	174962	3.14148e+06	43340128	2598859	ND	81347	ND	682323	60118	380062	ND	ND	156734	478239328	64270	ND	163317536	277978944	974500	49160	116448	1586591	610326	1.69665e+06	ND	ND	167483792
		3-hydroxyquinine	43496	LC/MS Pos Early	100002410	3271	341.186	78549-61-8	441264	C07344	HMDB01091	ND	ND	ND	ND	ND	ND	ND	16839122	ND	ND	ND	ND	ND	ND	ND	ND	ND	ND	ND	ND	ND	ND	ND	ND	ND	ND	ND	35944976	ND	ND	ND	ND	ND	ND	ND	ND	ND	546681
		4-acetamidophenol	12032	LC/MS Pos Early	1383	1750	152.071	103-90-2	1983	C06804	HMDB01859	ND	ND	ND	ND	120883576	ND	ND	871427136	990015488	ND	ND	ND	ND	38918408	8.06866e+06	ND	ND	ND	ND	ND	ND	ND	ND	ND	1244749568	ND	ND	1031841664	1128817664	2994122	ND	ND	ND	ND	ND	ND	ND	312617024
		4-acetamidophenylglucuronide	15736	LC/MS Neg	100000043	1400	326.088	120595-80-4	83944	-	HMDB10316	930229	276205	82968	599656	197387152	ND	117180	1648502912	791166656	ND	285280	680529	266827	166805616	4982103	ND	ND	93136	119408	338153	1532017	404788	395366	251570	1762032896	405291	70727	1000363840	1142536960	2580903	232873	513692	502690	90672	178033	ND	ND	697332864
		4-acetaminophen sulfate	37475	LC/MS Neg	2049	1792	230.013	10066-90-7;32113-41-0	83939	C06804	HMDB59911	3491660	1893802	721680	1682727	273072928	125957	473888	2674427136	3966386688	449656	2237585	1717301	3360618	151626976	14453251	578718	121450	450912	610250	1058979	3.89707e+06	1815429	1802865	927657	4752631808	2911206	339590	1831399296	5476859392	8465420	814196	1820746	862813	1103705	938183	ND	174665	990252032
		4-acetylphenol sulfate	44620	LC/MS Neg	100000711	2375	215.002	-	4684006	-	-	1554581	2499439	3147058	1228719	1.85728e+06	627629	2239450	3611763	7626363	4398997	9194753	2149387	1851621	4187083	1.9449e+06	3535614	825648	6852115	2445303	3626654	1292419	8596898	6218171	1411164	21547844	876377	2365477	2365415	3.029e+06	2164653	4631241	1448782	3495164	1301902	1.70981e+06	2150358	386441	5554577
		4-aminophenol sulfate (2)	54809	LC/MS Neg	100010871	1168	188.002	-	-	-	-	ND	ND	ND	ND	189852	ND	ND	853811	11050374	ND	ND	ND	ND	ND	ND	ND	ND	ND	ND	ND	ND	ND	ND	ND	6738105	ND	ND	770257	15798293	ND	ND	ND	ND	ND	ND	ND	ND	1.00541e+06
		4-hydroxycoumarin	37445	LC/MS Neg	100002049	2470	161.024	1076-38-6	54682930	C20414	-	294867	ND	116118	161969	3231008	ND	2909113	300207	2618537	ND	198400	ND	100103	100561	53986	1382097	314362	351515	323133	69270	280967	1040619	26145258	124134	1110311	109306	919305	6263581	461128	728449	72120	89562	800802	41508	948337	4523206	139410	111600
		acetylsalicylate	37493	LC/MS Neg	100001953	2020	137.024	50-78-2	2244	D00109,C01405	HMDB01879	ND	ND	ND	ND	ND	ND	ND	ND	ND	ND	ND	ND	ND	ND	ND	ND	4265269	ND	ND	ND	ND	ND	ND	ND	ND	ND	ND	ND	ND	ND	ND	ND	ND	ND	ND	ND	3611547	ND
		allopurinol	43534	LC/MS Pos Early	100004518	1240	137.046	315-30-0	2094	-	-	ND	ND	ND	ND	ND	ND	ND	113129888	ND	ND	ND	ND	ND	ND	ND	ND	ND	ND	ND	ND	ND	ND	ND	ND	ND	ND	ND	105964	ND	ND	ND	ND	ND	ND	ND	ND	ND	ND
		allopurinol riboside	38321	LC/MS Neg	100002454	1660	267.073	16220-07-8	-	-	-	ND	ND	ND	ND	ND	ND	ND	343905152	ND	ND	ND	ND	ND	ND	ND	ND	ND	ND	ND	ND	ND	ND	ND	ND	ND	ND	ND	10963646	ND	ND	ND	ND	ND	ND	ND	ND	ND	ND
		alpha-hydroxymetoprolol	54738	LC/MS Pos Early	100006385	2900	284.186	56392-16-6	114962	-	-	ND	ND	ND	ND	ND	ND	ND	ND	ND	ND	ND	ND	ND	ND	ND	ND	ND	ND	ND	479764192	ND	ND	ND	ND	ND	ND	ND	ND	ND	ND	ND	ND	ND	ND	ND	ND	ND	ND
		amoxicillin	52948	LC/MS Pos Early	100008962	2734	366.112	26787-78-0	2171;4663997	-	-	ND	ND	ND	ND	ND	ND	ND	ND	ND	12880527	ND	ND	ND	ND	ND	ND	ND	ND	ND	ND	ND	ND	ND	ND	ND	ND	ND	ND	ND	6720852	ND	ND	ND	ND	ND	ND	ND	ND
		azithromycin	52966	LC/MS Pos Late	100008963	918	749.516	83905-01-5	2269	-	-	ND	ND	ND	ND	ND	ND	ND	ND	ND	ND	ND	ND	ND	ND	ND	ND	ND	ND	ND	ND	ND	ND	ND	ND	ND	ND	ND	ND	ND	ND	ND	ND	ND	ND	ND	ND	ND	ND
		carboxyibuprofen	43333	LC/MS Neg	100004171	1920	235.098	15935-54-3	10444113	-	-	ND	61300444	ND	ND	ND	ND	ND	ND	ND	ND	ND	ND	ND	ND	ND	ND	ND	ND	ND	ND	ND	ND	227691760	ND	ND	ND	ND	ND	ND	ND	ND	ND	ND	ND	ND	ND	ND	ND
		Cetirizine	54745	LC/MS Pos Late	100009034	1052	389.163	83881-51-0	2678	C07778,D07662	HMDB05032	ND	ND	239660288	ND	ND	ND	ND	ND	ND	ND	ND	ND	ND	463379840	ND	32608158	ND	ND	ND	ND	ND	ND	703649408	ND	ND	ND	ND	ND	ND	ND	ND	ND	472478080	ND	ND	13709538	ND	ND
		ciprofloxacin	57614	LC/MS Neg	100000687	2724	392.126	85721-33-1	4011971;2764	C05349	-	ND	ND	ND	ND	931142208	ND	ND	ND	ND	ND	ND	ND	ND	ND	ND	ND	ND	ND	ND	ND	ND	ND	ND	ND	1182015	ND	ND	ND	ND	ND	ND	ND	ND	ND	ND	ND	ND	ND
		desmethylnaproxen	46331	LC/MS Neg	100001787	3045	215.071	52079-10-4	-	-	-	ND	ND	93177144	ND	ND	ND	ND	ND	ND	ND	ND	ND	ND	ND	ND	ND	ND	ND	ND	ND	ND	ND	32072912	ND	ND	ND	ND	ND	ND	ND	ND	ND	40468308	ND	ND	466504	ND	ND
		desmethylnaproxen sulfate	46106	LC/MS Neg	100001788	2276	295.028	-	184679	-	-	ND	ND	1338891904	ND	ND	226624	ND	ND	ND	ND	ND	ND	ND	ND	ND	ND	ND	ND	ND	ND	ND	ND	1107302784	ND	ND	ND	ND	ND	ND	ND	ND	ND	755428928	ND	ND	16998036	ND	ND
		diltiazem	42981	LC/MS Pos Late	100004015	888	415.169	33286-22-5	39186	C06958	HMDB14487	ND	ND	ND	ND	ND	ND	ND	ND	ND	ND	ND	ND	ND	ND	ND	ND	ND	ND	ND	ND	ND	ND	ND	ND	ND	ND	ND	ND	ND	ND	ND	ND	ND	ND	ND	ND	ND	ND
		diphenhydramine	38669	LC/MS Pos Late	100002732	911	256.17	147-24-0	3100	C06960	HMDB01927	ND	ND	509158528	ND	12692790	ND	ND	93111856	ND	ND	ND	ND	ND	ND	ND	ND	ND	ND	ND	ND	ND	ND	343590400	ND	3041144	398799	ND	12690786	13967604	ND	ND	ND	ND	ND	ND	ND	ND	ND
		doxycycline	39273	LC/MS Pos Late	100003009	829	445.161	24390-14-5	-	-	-	ND	ND	ND	ND	ND	ND	ND	ND	ND	ND	ND	3049705	ND	ND	ND	ND	ND	ND	ND	ND	ND	ND	ND	ND	ND	ND	ND	ND	ND	ND	ND	534320	ND	ND	ND	ND	ND	ND
		enalapril	52949	LC/MS Polar	100008948	900	375.193	75847-73-3	3222	-	-	ND	ND	ND	ND	ND	883212	ND	ND	ND	ND	ND	ND	ND	ND	ND	ND	ND	ND	ND	ND	ND	ND	ND	ND	ND	372151	ND	ND	ND	ND	ND	ND	ND	ND	ND	ND	ND	ND
		escitalopram	40459	LC/MS Pos Late	100003444	908	325.171	219861-08-2	146570	-	HMDB05028	ND	ND	ND	ND	ND	ND	ND	ND	162657008	ND	ND	ND	ND	ND	ND	ND	ND	ND	277427904	ND	ND	ND	ND	ND	ND	ND	ND	ND	205642528	ND	ND	ND	ND	ND	ND	ND	ND	ND
		famotidine	42613	LC/MS Neg	100003964	2620	336.038	76824-35-6	5702160	D00318	HMDB01919	ND	ND	ND	ND	ND	ND	ND	ND	ND	ND	ND	ND	ND	ND	ND	ND	ND	ND	ND	ND	ND	ND	ND	ND	ND	ND	ND	ND	ND	ND	ND	ND	ND	ND	ND	ND	ND	ND
		fentanyl	53000	LC/MS Pos Late	100006744	929	337.227	437-38-7	3345	D00320	HMDB14951,HMDB05029	ND	ND	ND	ND	ND	ND	ND	ND	ND	ND	ND	ND	ND	77672720	ND	ND	ND	ND	ND	ND	ND	ND	ND	ND	ND	ND	ND	ND	ND	ND	ND	ND	16697562	ND	ND	ND	ND	ND
		fluoxetine	44619	LC/MS Pos Late	1382	1025	310.141	59333-67-4	3386	D00326	-	ND	ND	ND	ND	ND	ND	ND	ND	ND	ND	ND	ND	ND	ND	ND	ND	ND	ND	ND	ND	ND	ND	ND	ND	ND	ND	ND	ND	ND	ND	ND	ND	ND	ND	ND	ND	ND	ND
		gabapentin	38686	LC/MS Neg	100002806	2407.4	170.119	60142-96-3	3446;6919078	D00332	HMDB05015	ND	ND	ND	ND	2623058176	ND	ND	ND	ND	ND	ND	ND	ND	2091012352	ND	ND	ND	ND	ND	ND	ND	ND	ND	ND	3124239872	ND	ND	ND	ND	ND	ND	ND	2029392128	ND	ND	ND	ND	ND
		hydrochlorothiazide	39625	LC/MS Neg	100002734	2046	295.957	58-93-5	3639	C07041	HMDB01928	ND	ND	76820600	ND	46453944	115088464	ND	ND	ND	ND	ND	97234000	ND	104121688	103091464	ND	197752576	ND	ND	ND	ND	ND	60749180	ND	36716016	115733112	ND	ND	ND	ND	ND	139405616	107371488	ND	102701552	1644178	144320624	ND
		hydroquinone sulfate	35322	LC/MS Neg	100001604	1395	188.986	123-31-9	161220	C00530	HMDB02434	6684859	22545996	8792370	3174323	11724367	6322892	15855393	6325038	14981092	17593024	25115832	17670320	25948252	21974406	9562824	4187537	11644275	33685320	14595903	7088220	11968069	21160930	24208520	5670780	14111278	18985780	8443717	9608483	11098484	5838623	26977832	6746633	11584203	4446566	8.06345e+06	10843309	2907297	30097274
		ibuprofen	17799	LC/MS Neg	1487	4925	205.123	15687-27-1	3672	D00126	HMDB01925	ND	552991	ND	ND	ND	ND	ND	ND	ND	ND	ND	ND	ND	ND	ND	ND	ND	ND	ND	ND	ND	ND	1408590	98179	ND	ND	ND	224475	ND	ND	ND	ND	ND	ND	ND	ND	ND	ND
		ibuprofen acyl glucuronide	45472	LC/MS Neg	100002406	4855	381.155	115075-59-7	163959	-	-	36937	39424016	2106712	819106	345965	ND	ND	243919	504224	3.00793e+06	206357	157127	5275608	1.63027e+06	186596	ND	ND	844947	ND	96918	ND	294729	69251056	1621198	28017	ND	ND	1002349	1.00684e+06	919119	91817	ND	509232	361113	252686	ND	ND	4816091
		lidocaine	35661	LC/MS Pos Early	100001538	3250	235.18	137-58-6	3676	D00358	HMDB14426	ND	ND	ND	ND	ND	ND	ND	ND	ND	ND	ND	ND	ND	ND	ND	ND	ND	ND	ND	ND	ND	ND	ND	ND	ND	ND	ND	ND	ND	ND	ND	ND	1181380	ND	ND	ND	ND	ND
		lisinopril	54787	LC/MS Neg	100009389	2617	404.219	76547-98-3	3937	-	-	ND	ND	4019104	ND	ND	ND	ND	1093526	ND	ND	ND	ND	ND	ND	ND	ND	ND	ND	ND	ND	ND	ND	4163089	ND	ND	ND	ND	298683	ND	ND	ND	ND	ND	ND	ND	ND	ND	ND
		metformin	38306	LC/MS Pos Early	100002405	2817	130.109	1115-70-4	4091	C07151	HMDB01921	ND	ND	ND	ND	ND	ND	ND	ND	ND	ND	ND	ND	ND	ND	ND	ND	ND	ND	ND	ND	ND	ND	ND	ND	ND	ND	ND	ND	ND	ND	ND	ND	ND	ND	ND	ND	ND	ND
		metoprolol	18037	LC/MS Pos Early	2028	3312	268.191	56392-17-7	4171	D02358	HMDB01932	ND	ND	ND	ND	ND	ND	ND	ND	ND	ND	ND	ND	ND	ND	ND	ND	ND	ND	ND	172054256	ND	ND	ND	ND	ND	ND	ND	ND	ND	ND	ND	ND	ND	ND	ND	ND	ND	ND
		metoprolol acid metabolite*	34109	LC/MS Pos Early	100001385	2950	268.154	56392-14-4	62936	-	-	ND	ND	ND	ND	ND	ND	ND	ND	ND	ND	ND	ND	ND	ND	ND	ND	ND	ND	ND	1160383104	ND	ND	ND	ND	ND	ND	ND	ND	ND	ND	ND	ND	ND	ND	ND	ND	ND	ND
		N,O-didesmethylvenlafaxine glucuronide	52358	LC/MS Neg	100006001	2639	424.198	1021933-99-2	-	-	-	ND	ND	ND	ND	ND	ND	ND	ND	ND	ND	ND	ND	ND	83542288	ND	ND	ND	ND	ND	ND	ND	ND	ND	ND	ND	ND	ND	ND	ND	ND	ND	ND	78574080	ND	ND	932219	ND	ND
		naproxen	12122	LC/MS Neg	1384	4155	229.087	22204-53-1	156391	C01517	HMDB01923	ND	ND	234023168	ND	ND	ND	ND	ND	ND	ND	ND	ND	ND	ND	ND	ND	ND	ND	ND	ND	ND	ND	106994368	ND	ND	ND	ND	ND	ND	ND	ND	ND	56019156	ND	ND	747707	ND	ND
		N-desmethyl tramadol	52355	LC/MS Pos Early	100006384	3360	250.18	147762-57-0	-	-	-	ND	ND	ND	ND	ND	ND	ND	ND	ND	ND	ND	ND	ND	ND	ND	ND	ND	ND	ND	ND	ND	ND	ND	ND	ND	ND	ND	ND	ND	ND	ND	ND	ND	ND	ND	ND	ND	ND
		N-ethylglycinexylidide	33080	LC/MS Pos Early	100001539	3209	207.149	7728-40-7	24415	C16561	HMDB60656	ND	ND	ND	ND	ND	ND	ND	ND	ND	ND	ND	ND	ND	ND	ND	ND	ND	ND	ND	ND	ND	ND	ND	ND	ND	ND	ND	ND	ND	ND	ND	ND	2692193	ND	ND	ND	ND	ND
		nicotine	38666	LC/MS Pos Early	100002736	2883	163.123	54-11-5	89594	C00745	HMDB01934	ND	92243168	ND	ND	ND	ND	ND	ND	ND	ND	ND	ND	ND	ND	ND	ND	ND	ND	ND	ND	ND	226486544	ND	ND	ND	ND	ND	ND	ND	ND	ND	ND	ND	ND	ND	ND	ND	ND
		norfluoxetine	37252	LC/MS Pos Late	100003769	1008	296.126	83891-03-6	4541	-	-	ND	ND	ND	ND	ND	ND	ND	ND	ND	ND	ND	ND	ND	ND	ND	ND	ND	ND	ND	ND	ND	ND	ND	ND	ND	ND	ND	ND	ND	ND	ND	ND	ND	ND	ND	ND	ND	ND
		noroxycodone	52363	LC/MS Pos Early	100006432	2930	302.139	52446-25-0	5489120	-	HMDB41960	ND	ND	ND	ND	ND	ND	ND	ND	ND	ND	ND	ND	ND	ND	ND	ND	ND	ND	ND	ND	ND	ND	ND	ND	ND	ND	ND	ND	ND	ND	ND	ND	ND	ND	ND	ND	ND	ND
		O-desmethyltramadol	53239	LC/MS Pos Early	100006382	3045	250.18	73986-53-5	-	-	-	ND	ND	ND	ND	ND	ND	ND	ND	ND	ND	ND	ND	ND	ND	ND	ND	ND	ND	ND	ND	ND	ND	ND	ND	ND	ND	ND	ND	ND	ND	ND	ND	ND	ND	ND	ND	ND	ND
		O-desmethyltramadol glucuronide	52357	LC/MS Pos Early	100006383	2741	426.212	383891-39-2	-	-	-	ND	ND	ND	ND	ND	ND	ND	ND	ND	ND	ND	ND	ND	ND	ND	ND	ND	ND	ND	ND	ND	ND	ND	ND	ND	ND	ND	ND	ND	ND	ND	ND	ND	ND	ND	ND	ND	ND
		O-desmethylvenlafaxine	43334	LC/MS Neg	100004173	4490	262.181	300827-87-6	-	-	-	ND	ND	ND	ND	ND	ND	ND	ND	ND	ND	ND	ND	ND	98969952	ND	ND	ND	ND	ND	ND	ND	ND	ND	ND	ND	ND	ND	ND	ND	ND	ND	ND	78513440	ND	ND	1008661	ND	ND
		oxycodone	52365	LC/MS Pos Early	100005837	2863	316.154	76-42-6	5284603	C08018	HMDB05024	ND	ND	ND	ND	ND	ND	ND	ND	ND	ND	ND	ND	ND	ND	ND	ND	ND	ND	ND	ND	ND	ND	ND	ND	ND	ND	ND	ND	ND	ND	ND	ND	ND	ND	ND	ND	ND	ND
		oxypurinol	41726	LC/MS Polar	100002489	1656	151.026	2465-59-0	4644	D02365	HMDB00786	ND	ND	ND	ND	ND	ND	ND	898267200	ND	ND	ND	ND	ND	ND	ND	ND	ND	ND	ND	ND	ND	ND	ND	ND	ND	ND	ND	458347616	ND	ND	ND	ND	ND	ND	ND	ND	ND	ND
		prednisolone	54742	LC/MS Neg	100009252	4701	359.186	-	5755	C07369,D00472	HMDB14998	ND	ND	ND	ND	ND	ND	ND	ND	ND	ND	ND	ND	ND	ND	ND	ND	ND	ND	ND	ND	ND	ND	ND	ND	ND	ND	ND	ND	ND	ND	ND	ND	ND	ND	ND	ND	ND	ND
		prednisone	54741	LC/MS Neg	100009251	4518	357.171	-	5865	C07370	HMDB14773	ND	ND	ND	ND	ND	ND	ND	ND	ND	ND	ND	ND	ND	ND	ND	ND	ND	ND	ND	ND	ND	ND	ND	ND	ND	ND	ND	ND	ND	ND	ND	ND	ND	ND	ND	ND	ND	ND
		quinine	39767	LC/MS Pos Early	100002968	3378	325.191	130-95-0	2728270	-	-	ND	ND	ND	ND	ND	ND	ND	30083516	ND	ND	ND	ND	ND	ND	ND	ND	ND	ND	ND	ND	ND	ND	ND	ND	ND	ND	ND	95789424	ND	584557	ND	ND	ND	ND	ND	ND	ND	1230573
		salicylate	1515	LC/MS Polar	501	802	137.024	69-72-7	338	C00805	HMDB01895	140685184	526545	1.73213e+06	13088252	9363061	16892626	3.99096e+06	12410878	20750874	706558	981918	231467	3.8105e+06	614137	8464654	832587	19912114	572365	2.85566e+06	351503	935549	26527386	10017923	15313288	53612812	81042696	2.28658e+06	6082442	25498758	349653	903544	349483	5322490	1016156	23123784	1.42709e+06	103712096	269775
		salicyluric glucuronide*	33384	LC/MS Neg	100001332	1463	370.078	-	-	-	-	37736552	1.0443e+06	1251620	7.63994e+06	18842080	28277136	3.41218e+06	16405016	8231579	2635477	1.77528e+06	400507	1376518	2539730	26433606	179413	41703620	858683	653521	1589810	1197855	172880304	3959539	5711985	80369768	70456544	1384719	8685179	8626408	694699	1917165	260402	1675325	766872	68300712	746241	23487868	617530
		S-carboxymethyl-L-cysteine	47897	LC/MS Pos Early	100002324	1490	180.033	638-23-3	1080	C03727	HMDB29415	2516467	1621553	17859232	1661865	2084513	2031122	2967342	1515597	1672487	3150824	6444500	4073322	2588683	5175157	2591341	2379883	2697473	11797232	2070068	2477584	3597489	3614895	9310717	1824588	2504958	3.40088e+06	4104286	928712	3094910	2507062	3.14431e+06	3254137	8742565	6253464	892939	ND	1781282	8095039
		sertraline	39757	LC/MS Pos Late	100002804	1070	306.081	79559-97-0	68617	C07246	HMDB05010	ND	ND	ND	ND	ND	ND	ND	ND	ND	ND	ND	ND	ND	ND	ND	ND	ND	ND	ND	ND	ND	ND	ND	ND	ND	ND	ND	ND	ND	ND	ND	ND	ND	ND	ND	ND	ND	ND
		Tramadol	53241	LC/MS Pos Early	100006381	3288	264.196	27203-92-5	33741	D08623,C07153	HMDB14339	ND	ND	ND	ND	ND	ND	ND	ND	ND	ND	ND	ND	ND	ND	ND	ND	ND	ND	ND	ND	ND	ND	ND	ND	ND	ND	ND	ND	ND	ND	ND	ND	ND	ND	ND	ND	ND	ND
		venlafaxine	38623	LC/MS Pos Late	100002807	848	278.211	93413-69-5	5656	C07187	HMDB05016	ND	ND	ND	ND	ND	ND	ND	ND	ND	ND	ND	ND	ND	2181747968	ND	ND	ND	ND	ND	ND	ND	ND	ND	ND	ND	ND	ND	ND	ND	ND	ND	ND	1895103232	ND	ND	43701712	ND	ND
	Food Component/Plant (phyochemicals)	1,6-anhydroglucose	21049	LC/MS Neg	100000939	919.7	161.046	498-07-7	2724705	-	HMDB00640	21501364	73767016	47024204	82067760	24937738	8957043	37117584	91819128	1579119	22037628	7115439	78512768	766080	96271280	13806854	32901610	52273500	295066848	10135503	36646640	24738478	36715028	36897292	10979205	33783800	11770200	4794817	11897785	10072759	5299549	4.11241e+06	23578616	127198280	1686303	8235634	42286288	30872634	39815928
		1-kestose	22012	LC/MS Neg	100000980	1054	503.162	470-69-9	440080	C03661	HMDB11729	4617414	942284	3878511	182719	261533	ND	131221	275425	86881	ND	819845	767531	77300	795460	132622	347496	2039820	656365	ND	627103	1119516	894594	1199450	ND	459131	ND	70837	240078	315429	184177	336429	115929	1335479	169376	117403	627486	371429	1916768
		1-methyl-beta-carboline-3-carboxylic acid	43449	LC/MS Neg	100004434	3190	225.067	22329-38-0	5406157	-	-	392129	219475	ND	ND	ND	111016	ND	465158	410342	79539	402496	55528	ND	819973	ND	455241	ND	277218	ND	213392	1188703	ND	ND	ND	86453	ND	29457	137341	409102	95376	88029	99654	ND	ND	ND	1652822	ND	ND
		2,3-dihydroxyisovalerate	38276	LC/MS Polar	100002417	1050	133.051	1756-18-9	677	C04039	HMDB12141	66397968	7545989	166913136	252199360	22574714	12694591	21646640	68443872	257909712	1543260032	1450797824	32859244	10278887	30726230	40495656	28251898	7132419	305501888	7580502	107051208	16149988	42253860	40495656	144613088	68724048	7670264	100493680	362874624	31935798	46576004	1001474496	75360080	30456208	12332448	27611728	30828024	18398102	511163744
		2,3-dihydroxypyridine	21132	LC/MS Pos Early	100000861	1420	112.039	16867-04-2	28115	-	-	2864791	2812048	2986253	1922509	3862878	5895037	3339979	9004156	2208269	1400846	1830306	1673929	514943	1876930	2669312	3381074	737921	12720091	817830	4300611	1168511	2127160	2518455	1389241	4955069	1490867	3143114	2127837	2733007	1276133	2941525	852925	976342	926363	3184871	1641933	896827	3249693
		2,8-quinolinediol sulfate	48691	LC/MS Neg	100004321	2612	239.997	-	-	-	-	7517540	4507762	208593	3190817	1136012	2684211	7.58665e+06	3591821	2382143	896423	4292158	5259858	1207267	13201131	1497010	24440142	712476	11117270	2299098	1521411	4303082	4.07728e+06	1325397	1321460	4485376	470278	5806915	5201329	5632724	2946263	1469008	8015229	1057481	7018418	1394300	9132364	2998466	1957377
		2-isopropylmalate	15667	LC/MS Neg	100000409	725	175.061	3237-44-3	77	C02504	HMDB00402	137899456	8407978	24561068	34259500	17255140	7335296	11128679	90785040	18383178	1002955136	1801426944	150312880	6459106	88025424	68890008	20553044	6155759	489086304	12256954	52632080	103065520	21058048	90285784	29011880	121707280	17564210	22963746	163735984	13562262	23278866	943370560	24864332	37619168	6637694	68451840	50721048	19695110	193694560
		2-keto-3-deoxy-gluconate	48141	LC/MS Polar	100005946	1900	177.04	17510-99-5	161227	-	HMDB01353	34170760	17622714	56668240	27104836	18592042	5344216	12248817	26645100	2026780	29304928	39918028	36794140	9710245	85362240	20498182	24182600	13110234	85839720	3425575	40040764	12287013	23369264	48411556	16733213	30676170	5.40205e+06	8840093	23411754	2.50086e+06	17719902	28760360	12505974	43516856	3.22626e+06	25897072	33643412	24048824	135482816
		2-oxindole-3-acetate	40479	LC/MS Pos Early	100003109	2378	192.066	2971-31-5	3080590	-	-	7436855	26312484	34471900	13558463	6630730	3964013	21789896	2602291	2785390	21158156	88294280	5135813	4357731	34354848	5214745	4250822	24520788	30539444	7017193	27911036	9520138	13636126	5739408	12135148	34186012	3729740	25621114	3267153	2657270	15465491	14725294	14873127	35889928	16543561	6783267	11200690	21329148	25592282
		2-piperidinone	43400	LC/MS Pos Early	100004295	1675	100.076	675-20-7	12665	-	-	9770932	74646104	ND	12978433	8397247	109922576	13488014	23618704	11435171	390720224	34568144	5482815	21878176	16944344	8.26549e+06	92707160	22312704	36998560	483380352	27531234	9816181	59627644	15886232	11107655	25124596	235084256	10159394	9765335	12845338	176800672	21689244	17228044	24825934	42891260	19044436	117811128	45437844	35427840
		3,5-dihydroxybenzoic acid	37508	LC/MS Neg	100002054	785.4	153.019	99-10-5	7424	-	HMDB13677	1299602	9659768	870011	341875	1504756	450503	1.56388e+06	826372	1119458	5767526	10153197	4605629	915337	2570237	506367	769630	1161315	1893765	1122734	3144063	958676	6486946	1984842	938933	1128896	426548	1158640	2967617	2210075	2311446	1883405	1454452	2.64138e+06	297818	668907	1162758	2169854	5977491
		3-hydroxycinnamate (m-coumarate)	20698	LC/MS Neg	100000842	1960	163.04	588-30-7;14755-02-3	637541	C12621	HMDB01713	260478	457458	ND	397659	612310	1324686	939734	1283848	354172	224427	364529	262484	1152667	83099	4456787	ND	512367	1508214	1728219	1644952	ND	1098132	188811	326630	559097	294337	1347619	937272	ND	60077	161548	296845	365290	1476814	11001932	ND	2.01259e+06	1395599
		3-hydroxycinnamate sulfate	48409	LC/MS Neg	100006094	1338	242.997	86321-30-4	6443141	-	-	546267	1603447	6436249	1756970	3112788	11103864	937330	1968236	1239556	5881574	1242181	501560	2107027	1300555	5660445	129995	1091607	13885405	6248362	3582515	176191	3807410	5263660	1189489	2810485	1064300	1341858	2494679	544651	1160942	839360	769396	630291	2286064	12201549	172666	2246437	11036713
		3-hydroxyindolin-2-one	42561	LC/MS Neg	100003823	2695	148.04	61-71-2	6097	C11130	-	431333	166083	253993	ND	ND	499231	178024	428015	401611	382341	269526	ND	273291	496332	ND	ND	634527	303256	2713144	470333	443804	266554	443049	158940	624169	1236836	ND	240177	659444	219038	140274	275198	951767	237995	ND	ND	302569	293474
		4-allylphenol sulfate	37181	LC/MS Neg	100001868	3805	213.023	-	-	-	-	1063535	2.78284e+06	2259416	4815255	3050432	175206	760739	3490471	1223730	1258247	1261478	921105	726675	1934557	1728088	877537	1572899	2497632	2.718e+06	807116	5533316	7750053	5018164	17946016	11676548	665895	4442548	10661157	4507216	8558189	10532112	2887510	4317648	2155537	5019375	17464160	1812182	9360202
		4-ethylphenol glucuronide	52937	LC/MS Neg	100009049	3167	297.098	-	-	-	-	385177	2857099	85175	341194	403604	2637185	403819	565848	6043875	458877	445311	799961	1095352	500508	82301	ND	ND	3.90647e+06	7410164	655368	795157	6057102	ND	353979	220825	2299659	1859846	150088	930125	44484	182445	1072536	908351	ND	ND	ND	129911	278791
		4-vinylguaiacol sulfate	48442	LC/MS Neg	100006126	3354	229.018	-	-	-	-	857207	2002584	1814719	91734	2047885	1435434	2310378	431152	3693890	5.74922e+06	35228096	944953	453533	10457948	2167993	7850213	193019	5950928	5129143	8053019	294448	3446516	2268601	119775	7468189	156197	3011634	615541	2796424	9516329	1846941	3147740	1299188	820228	969908	10573136	107244	8851093
		abscisate	21156	LC/MS Neg	100000879	3170	263.129	14375-45-2	5280896	C06082	HMDB35140	1.17299e+06	10051.5	165646	13752.4	5419.4	5787.1	29619.5	157798	170446	1143347	2500426	2127788	48231	178775	149292	550791	139631	143006	4343.5	234653	146929	50096	865816	172978	391533	20188.9	57728	259095	41917	157103	371245	140065	129923	77468	620611	2579228	62383	266291
		acesulfame	48569	LC/MS Neg	100006203	1581	161.987	55589-62-3	-	-	-	ND	3.39246e+06	ND	ND	698221056	23200622	94768696	19376366	96691320	7606769	ND	71382	112021	354893600	86687424	ND	667144960	586475712	51965732	54779	295472	649166	ND	16438107	266602640	5906826	1084294	5077971968	522772544	120650544	698554	179319360	361156544	247478912	87036432	4252328	294459392	191045920
		acetolactate	38645	LC/MS Neg	100002418	1300	131.035	6034-46-4	22	C00900	HMDB06833	366226	465742	860327	ND	ND	ND	200699	232061	104912	770599	1007532	371597	ND	832168	ND	ND	ND	13757891	ND	286243	481013	1.92738e+06	1644199	ND	ND	ND	ND	ND	ND	242469	602297	ND	ND	472051	ND	343223	ND	5.62942e+06
		alliin	41494	LC/MS Neg	100003473	1003.3	176.039	556-27-4	87310	C08265	HMDB33592	319371	ND	394969	ND	ND	ND	ND	130587	ND	405124	1353765	445996	156387	ND	239339	290392	ND	ND	ND	ND	727180	358404	220846	ND	163730	ND	ND	179533	ND	ND	1894079	ND	51786	214371	239487	541896	ND	600022
		beta-guanidinopropanoate	35101	LC/MS Pos Early	100001411	2145	132.077	353-09-3	67701	C03065	HMDB13222	1319536	ND	457215	46037168	967815	ND	894273	905381	2.9809e+06	1.50199e+06	5252837	1.32857e+06	1521068	ND	ND	719603	ND	3376437	8808809	899210	1886174	ND	201850	26509544	2214085	1103058	743519	1399479	2485475	261648	5020794	ND	457022	1907819	188423	1144887	160706	774403
		cinnamoylglycine	38637	LC/MS Neg	100002253	3127	204.067	16534-24-0	709625	-	HMDB11621	53345324	109962440	82829824	137076416	76587176	9862114	145440000	89587376	152964352	43887228	180816144	102753144	4831522	162449600	3544583	2276121	132014264	24413474	6811738	18189718	33492376	140072432	267732736	112853400	107319112	7261179	132832536	104336744	145570592	3075211	159213872	76530704	168370992	3459250	6919137	19157508	12696498	28784496
		daidzein	32453	LC/MS Neg	100001219	3566	253.051	486-66-8	5281708	C10208	HMDB03312	122156	763872	ND	ND	32055	1.66064e+06	124980	244691	969133	ND	ND	ND	4804091	ND	210691	ND	ND	5348562	814970	ND	ND	2.00273e+06	ND	ND	ND	2659522	249891	ND	115499	ND	ND	ND	ND	155844	100833	ND	ND	ND
		daidzein sulfate (2)	48728	LC/MS Neg	100006363	3330	333.008	-	-	-	-	689056	733896	ND	ND	ND	282186	412976	4187141	18692310	ND	ND	ND	7454360	ND	91869	ND	ND	10061320	1478890	ND	ND	1061971	ND	ND	ND	1064215	874944	ND	1265829	ND	ND	ND	ND	631439	ND	ND	ND	ND
		dihydroferulic acid	40481	LC/MS Neg	100003432	1928	195.066	1135-23-5	14340	-	-	1595082	1674450	1512083	746887	834599	1579160	1398265	5455379	1578517	3419579	1870280	311605	3822398	803396	19655318	3117386	504280	1625958	668523	2557208	417528	3458150	2175427	1578273	2848759	312589	2815389	5919677	1.03782e+06	1733748	930742	784934	2803109	3411022	19279088	2966153	2942635	2108420
		enterolactone	39626	LC/MS Neg	100003070	4515	297.113	78473-71-9	10685477	-	-	448792	1900715	616956	61987	206655	ND	294451	528559	1757129	ND	221474	425699	40239	93898	ND	ND	ND	247433	38457	855528	246786	9917856	1220914	355058	643414	ND	659375	700840	1026511	ND	246086	524127	453989	ND	98224	ND	ND	161657
		erythritol	20699	LC/MS Polar	100000846	1491	167.056	149-32-6	222285	C00503	HMDB02994	48353260	43645992	79916944	80420320	27455904	16529147	41197480	85886792	15518337	150420944	175162752	47234072	27679444	115100392	21201312	46426784	50950768	108008304	44203900	49267536	42860644	67195512	71933016	60937512	92419784	15917614	29908404	60536040	16364584	28517746	107191824	25394050	75935456	23842234	36972380	63481136	64692436	74750256
		eugenol sulfate	48715	LC/MS Neg	100006171	3782	243.033	95480-60-7	180632	-	-	6067828	3175506	11321868	1701010	29470662	1324438	636711	6357348	3075778	3.5957e+06	14499483	7217914	12605851	2447374	2598472	2490719	62479296	3.57135e+06	1184747	33579832	3.16975e+06	42672876	28731928	3587740	7.94064e+06	590312	1349341	9044317	1602616	177234448	2873690	6602696	3457594	4622049	5557106	6509056	777711	7.62352e+06
		ferulate	35630	LC/MS Neg	100001542	1755	193.051	537-98-4	445858	C01494	HMDB00954	289437	280710	218241	86840	160459	407936	175843	263854	82458	1556750	882723	359333	256180	657753	526150	355970	88051	756348	44760	393770	182660	486766	629618	ND	381061	57825	159080	383460	ND	804354	275551	ND	228709	102127	756408	460946	192113	589644
		ferulic acid 4-sulfate	47114	LC/MS Neg	100005389	1225	273.007	86321-29-1	6305574	-	HMDB29200	30236300	12445940	20913808	2541368	9405405	15760034	3987990	8913720	5790893	14302485	85732368	18358136	19832188	29411596	33390550	33083862	9426346	46401488	4208115	25903656	20245736	21901476	48871548	3169225	21052782	5710971	5100401	14377187	5813623	15202110	29862944	12989109	8031132	10821629	45227000	59900620	4128299	58401552
		ferulylglycine (1)	54936	LC/MS Neg	100010912	2239	250.072	-	-	-	-	11245412	11572086	5816393	4853875	4014977	16131221	4369347	15511363	4821450	156279040	26966916	12875701	18095452	28094038	28832732	40862388	3668791	36759540	2032308	16567802	10452847	21985452	29686932	12547145	9059984	1937909	7.22855e+06	25013218	3828598	135478848	9212503	6.99182e+06	18014662	6593054	19992400	29855200	8472035	40202240
		ferulylglycine (2)	54937	LC/MS Neg	100010913	2172	250.072	-	-	-	-	9301039	3171779	706882	1223338	2126417	17810538	5295936	10577348	6984517	122975176	8.17139e+06	3711596	5687354	8461653	7039202	18633322	1459851	10519113	858783	6513814	4836869	3.69416e+06	4555402	3293996	2109594	ND	4002789	8244005	2673187	76005304	5150209	2798207	4639866	2277807	3061986	13580156	2615181	12044091
		fucitol	38313	LC/MS Neg	100002455	816.1	165.077	13074-06-1	3429	-	-	14657334	15239478	32279544	33209714	12012365	5924015	14295185	130788232	4288097	38152976	37006164	14043791	8.31871e+06	40215388	11112536	13563608	9668866	35362376	14401285	26358854	12501079	51871436	142363808	17745712	25332512	4365194	10602506	33778788	4700186	14027156	23782940	5906799	55553808	5022185	14397316	22469570	19271636	44292264
		furaneol sulfate	54795	LC/MS Neg	100009328	1900	206.997	-	-	-	-	30911400	11890129	22528136	12936906	10775594	3308897	15241147	10933644	11849161	55375516	51487328	9124442	6985681	22294380	12814822	28743856	12275169	81545040	48819808	15527272	11015067	21076562	65611428	24305864	70563888	3243260	11963496	8619329	7699993	22602612	25599444	5942058	20078420	15197853	7332888	37046984	47134208	63915696
		glucoheptose	20705	LC/MS Polar	100000852	2573	209.067	62475-58-5	71306729	-	-	1.11153e+06	983730	846553	1.70359e+06	905285	486451	581685	1.16234e+06	941435	25697140	49499244	28312574	1.26329e+06	2.4229e+06	1.76101e+06	793251	814975	1.2028e+06	1.327e+06	1.09308e+06	1.30303e+06	970162	2.71196e+06	954667	1425975	572477	724800	1021002	857502	1.21184e+06	3.75847e+06	1.28305e+06	3.42939e+06	1.29534e+06	1204661	1.6857e+06	737976	1.88996e+06
		gluconate	587	LC/MS Polar	338	2922	195.051	527-07-1	10690	C00257	HMDB00625	253202368	263972704	336433504	193121392	145769664	108124840	300445696	260666352	130882520	259840352	337130848	273246272	248482096	446992000	98350344	253202368	257216096	486927872	6111121	336122016	141499920	339774432	257845280	213462400	353629952	134687712	368233504	173533712	145245504	87225712	154252080	125020208	268859712	214481424	163960288	353918784	220974864	416590144
		glucoraphanin	42571	LC/MS Neg	100003835	1320	436.041	21411-41-5	9548634	-	-	ND	ND	ND	ND	ND	ND	ND	ND	ND	ND	ND	ND	ND	ND	ND	ND	ND	ND	ND	ND	ND	ND	ND	ND	ND	ND	ND	ND	ND	ND	ND	ND	ND	ND	ND	ND	ND	ND
		homocitrate	39601	LC/MS Pos Early	100002554	1179	224.077	320573-06-6	439459	C01251	HMDB03518	2586229	2446244	9142726	3160273	2504138	1218752	2624033	4433938	1061712	10606845	8096555	2993796	2314886	3791944	1.55878e+06	4021440	2519945	8046123	2696492	3851980	1.84443e+06	2893233	6668452	3161818	4512722	1087985	2292759	3174019	1403139	2753256	4590072	1595713	3.14801e+06	1427926	2437490	4652612	2626934	6503076
		homostachydrine*	33009	LC/MS Pos Early	100001550	1750	158.118	1195-94-4	441447	C08283	HMDB33433	51270312	25083080	14952678	26782592	26865044	11472219	60077744	60784960	22830648	33110402	30147818	40127700	20437092	103855672	24550904	56296008	11941567	44036512	18434168	33411012	23207588	18969770	80707704	22376950	51120372	20405398	89282288	50247900	17849220	73952488	12201979	27973788	35278232	33112954	35883176	99379160	14549761	38038272
		indolin-2-one	43374	LC/MS Pos Early	100004318	2575	134.06	59-48-3	321710	C12312	-	3554120	3188179	4985393	1758363	3359884	2722222	1548983	2666647	1754852	6353884	2141810	2147826	5107889	4810683	1755098	1538243	3858255	5639945	5650006	6831093	2809217	4329325	12460521	2527315	4282466	7176807	1582187	1718886	2077522	3.68512e+06	1542009	1404302	5990206	2597194	2730039	1.7793e+06	3982432	7019651
		isoeugenol sulfate	48997	LC/MS Neg	100006089	3893	243.033	-	-	-	-	34032	253830	ND	197778	494943	ND	109242	ND	292405	367639	268141	921807	65368	45619	105908	68805	311154	352265	ND	264990	103633	573934	3989843	199210	311458	32450	ND	40836	100795	322517	115343	768171	45428	84309	179399	2729619	ND	137763
		levulinate (4-oxovalerate)	22177	LC/MS Pos Early	100000765	1433	99.0441	123-76-2	11579	-	HMDB00720	1438057	1395781	6037360	2211232	1682052	1919010	984392	10018478	ND	2125813	2572652	1224361	1448804	2088705	ND	2206660	1485496	3965044	1226718	2176725	1257284	1635039	2534868	1575052	2108803	1602857	1408712	1663247	1401764	1111916	1092694	737371	2358700	1144354	2306635	2696162	1711699	1927832
		methyl indole-3-acetate	1584	LC/MS Pos Early	1104	3339	190.086	1912-33-0	74706	-	HMDB29738	283467	573478	643047	1338270	ND	650868	780821	761177	66157	1305818	1406030	237882	151043	109120	185114	511480	163960	1494047	6483474	690657	60336	524786	657531	2291656	859954	654579	914974	888706	143331	232417	571886	471611	3226971	75929	761985	882423	2044626	293368
		N-(2-furoyl)glycine	31536	LC/MS Neg	100001086	1525.8	168.03	5657-19-2;5657-19-2	21863	-	HMDB00439	75357256	35553608	108275736	24990868	64109480	64005812	24427980	125147088	64205676	57126388	114249080	28218662	5237339	76260344	57065520	287784416	10282271	319045952	163596592	298877280	26305476	46866096	172309920	15626514	88942664	3.49839e+06	15833369	60497424	92840056	11776974	35319216	14884985	54511444	7926234	46429688	56501240	48448372	119600096
		N-acetylalliin	45404	LC/MS Pos Early	100005367	1348	220.064	-	-	-	-	161067936	1359176	145696784	58126176	16831248	656242	4508806	26571388	18232392	453122784	375871168	108161968	72816592	17240044	173719040	50410088	1724018	34335156	18399694	47324692	283276224	147996304	86308888	11685476	122940992	3112145	3211115	46730308	6892905	27253170	497960032	25128420	55750604	89787456	195101152	109745584	26308196	168711088
		N-acetylpyrraline	48438	LC/MS Neg	100006120	2545	295.13	-	-	-	-	3316923	3033429	1.89618e+06	5066662	8.12013e+06	779545	10920553	1604892	3189531	12300135	3317993	2301610	1651889	2891233	18963424	4536988	1986682	20511006	7172660	26167020	1.04407e+06	2426615	5468222	4558976	8509307	425314	2763674	2556557	6306714	6981650	3850358	1518744	12613470	314548	4990949	5807528	10788293	11282503
		N-acetyl-S-allyl-L-cysteine	47136	LC/MS Neg	100005818	2237	202.054	23127-41-5	152467	-	-	2099965	ND	2598802	5966816	1.03231e+06	ND	150035	79119	578984	42401812	2351360	3061283	7702049	374016	7234701	1206611	ND	2960619	769539	2677548	6042459	1.31393e+06	5799475	713507	1051120	ND	ND	146344	ND	1182408	2.99894e+06	857253	2264163	5334685	3216607	1.88947e+06	ND	23053168
		naringenin	44663	LC/MS Neg	100000920	3437	271.061	67604-48-2	932	C00509	HMDB02670	119773	67631	ND	ND	ND	ND	ND	166865	ND	276489	383342	ND	200509	ND	ND	450554	27222	446900	ND	175411	ND	462816	ND	ND	ND	ND	28536	203885	ND	302403	99100	51100	ND	ND	6150333	923206	ND	680206
		naringenin 7-glucuronide	54924	LC/MS Neg	100010898	3144	447.093	-	-	-	-	1873607	713179	188764	ND	30484	ND	46775	4329709	685994	1081101	7340268	ND	1189964	395135	986386	6501785	291324	1850897	245654	766354	155681	2517574	482108	50909	270966	75333	710195	7323202	ND	3869998	2562729	2608629	314356	278271	74901392	4665792	ND	5371843
		piperidine	38183	LC/MS Pos Early	100002398	2500	86.0964	110-89-4	8082	C01746	HMDB34301	251016448	53075576	227152144	108800304	109520952	8079335	43479008	102285608	52732496	53087912	49916564	66659892	7938882	216685904	31929440	45091860	9354811	117071248	56219248	43120688	85707288	42051628	192375264	146348848	70591432	9233759	38470332	170649744	63462848	41118808	40425176	105512736	171625184	47445052	78715472	105432024	10586758	77669640
		piperine	33935	LC/MS Pos Late	100001267	1168	286.144	94-62-2	638024	C03882	HMDB29377	ND	765456	1.00499e+06	615497	77815	ND	369865	ND	ND	101309	ND	ND	ND	ND	214530	105141	44031	ND	ND	39052	126126	350151	941554	302484	427312	43209	ND	ND	57751	ND	84214	ND	ND	729130	162293	ND	ND	247492
		pyrraline	48428	LC/MS Neg	100001767	2304	253.119	74509-14-1	-	-	-	2543661	1.46898e+06	ND	1811130	2768376	2.59132e+06	12570719	1.50768e+06	1231976	4462226	1966535	1982614	1463593	1679131	9815420	4759462	1147585	11714484	4798130	8111552	921414	989684	ND	1377811	2327556	856968	3403893	2374229	1932426	2902388	3.73893e+06	1568207	5.2904e+06	258142	1958163	6094909	6698843	8429944
		quinate	18335	LC/MS Polar	100000442	2432.9	191.056	77-95-2	6508	C00296	HMDB03072	701462528	38065080	1293858304	532591712	871262208	466993888	286143840	1536414208	600914880	186599696	52395400	242956048	11130567	40633128	691805376	28295206	15637266	1891093504	576167744	889869376	356310816	124038168	1120498816	489639328	1121013376	11089866	387832064	1001970816	653598784	106681328	48085728	128253688	46682028	12541778	922384576	46759476	175194800	749154048
		saccharin	21151	LC/MS Neg	100000870	1999.7	181.992	81-07-2	5143	D01085	HMDB29723	256128	2198352	1766687	520651	33064932	6855121	576885	17194456	8830867	5557414	369129	7038691	15105546	614515	5453811	388134	980426	12518367	20351044	5483946	825461	1978364	39210464	4.13234e+06	29063416	529418	1371266	4477785	5835964	4.11491e+06	569740	4047176	608183	1950977	11524087	1768288	4287287	72958656
		S-allylcysteine	43239	LC/MS Pos Early	100004509	2690	162.058	21593-77-1	98280	-	-	ND	ND	88757	70365	ND	ND	ND	ND	ND	1524165	ND	ND	473065	ND	344908	104941	ND	ND	ND	ND	498449	ND	78125	ND	ND	ND	ND	ND	ND	ND	439826	ND	ND	376563	ND	ND	ND	924935
		stachydrine	34384	LC/MS Pos Early	100001296	1440	144.102	4136-37-2	115244	C10172	HMDB04827	3267377920	2157339392	2341044992	1915160704	122784224	376847808	1328742400	6723038720	980495424	2389640960	8161526784	833940736	3179602432	2371630080	3724094976	7432654848	2265414656	382554208	171364800	746041984	1132191872	3586053632	3930616576	699721088	5635887616	166347088	737426240	6412692480	254653024	2295235840	5230058496	1333407360	2050577024	987461248	6745862656	12538229760	1918097024	453379872
		sucralose	36649	LC/MS Neg	100001789	3140	395.007	56038-13-2	71485	C12285	HMDB31554	242091	1290364	ND	ND	4992888	5173802	611308	ND	181571	ND	ND	ND	ND	830501	684843	ND	ND	ND	1.69701e+06	ND	51622	ND	ND	ND	7.58225e+06	2.02813e+06	ND	ND	84200	124945	ND	1.68032e+06	1620559	306669	442865	ND	152992	117329
		sulforaphane	38697	LC/MS Pos Early	100002816	2535	178.035	4478-93-7	5350	-	HMDB05792	ND	ND	ND	71538	ND	ND	ND	ND	ND	ND	ND	ND	ND	ND	ND	ND	ND	ND	ND	ND	315033	584549	ND	298545	ND	ND	ND	442101	ND	126555	ND	ND	ND	ND	ND	236381	ND	ND
		sulforaphane-cysteine	40451	LC/MS Pos Early	100003718	2433	299.055	-	-	-	-	ND	ND	ND	ND	ND	ND	ND	ND	ND	ND	ND	ND	ND	ND	ND	ND	ND	ND	ND	ND	991202	1555146	ND	ND	ND	ND	ND	ND	ND	987204	ND	ND	ND	128421	ND	230552	ND	ND
		sulforaphane-N-acetyl-cysteine	40468	LC/MS Neg	100003719	2230	339.051	-	-	-	-	ND	453464	ND	266838	ND	ND	ND	ND	ND	ND	ND	ND	ND	106863	ND	ND	ND	ND	ND	ND	2254362	3.86959e+06	ND	581909	ND	ND	ND	1438646	ND	1892584	ND	ND	ND	339772	ND	2.05678e+06	ND	ND
		syringic acid	37091	LC/MS Neg	100001919	1450	197.046	530-57-4	10742	C10833	HMDB02085	387639	208922	191903	ND	139190	ND	ND	421512	167530	4666087	5167111	315957	633250	340521	382446	382257	150136	1988976	185852	599183	267773	ND	678862	92708	564269	ND	147397	421942	109864	316753	1622693	139777	214990	ND	ND	320290	150452	1204614
		syringol sulfate	48454	LC/MS Neg	100006256	2395	233.013	52904-67-3	-	-	-	515784	1077639	5414607	474727	300536	1076347	592420	959850	636571	9117445	3923775	570885	731763	13604562	633121	429235	1606954	7066786	1187022	1543426	388188	1267883	48730992	1640472	2382430	1434963	1435959	523621	584563	2882353	1452515	842932	14763926	1306667	521477	30088428	2238640	2981033
		tartarate	15336	LC/MS Neg	100000295	615.3	149.009	87-69-4;6106-24-7	444305	C00898	HMDB00956	30828808	307883	10246896	34351300	4550840	5555072	6431080	1726821	43249252	665086592	424706368	101849688	9080794	1002132224	10508571	2918028	37624776	5.92136e+06	7150321	69766328	67434936	ND	5647470	11630163	4407873	506750	26884240	71239472	ND	4652203	366393184	441182	224274000	ND	5943567	3.08635e+06	5207316	4392481
		theanine	22206	LC/MS Pos Early	100000784	2180	175.108	3081-61-6	439378	C01047	HMDB34365	ND	ND	ND	ND	ND	79295	5955896	ND	ND	18379908	ND	ND	ND	ND	ND	224073	909414	ND	ND	ND	ND	1666917	ND	ND	ND	4066835	10306786	87316	720124	29234488	1047735	237005	243853	ND	ND	918346	ND	5825087
		thymol sulfate	36095	LC/MS Neg	100001757	4410	229.054	89-83-8	-	C09908	HMDB01878	3685763	4414015	5072917	2069539	14372506	361595	2130031	598287	4648778	2733829	95894584	7911268	24248522	31881880	48822504	71420984	2439855	106770824	20027508	7271335	3476885	14285565	64596848	5570320	35005428	214779	8684036	30160862	6569040	99256136	52333712	6409806	8935982	21151306	31926628	45592448	1459235	42556840
		umbelliferone sulfate	48674	LC/MS Neg	100006282	2442.8	240.981	69526-88-1	129659	-	-	3525183	1087852	1857448	2102071	46997652	328552	39560308	2614042	35848688	733299	1351064	292293	1345204	2188552	702093	17622342	4469438	2374103	3.5572e+06	338298	2682469	10370437	355940416	1.5526e+06	19576156	1591231	9369593	89182016	5826419	8808012	970149	1775244	11996130	546536	10756473	65937172	1.88988e+06	1345640
		vanillate	35639	LC/MS Neg	100001634	1100	167.035	121-34-6	8468	C06672	HMDB00484	1039920	663805	ND	1215731	652685	1354775	765069	3223193	615496	1560050	3.72333e+06	1786689	840111	1126264	1322309	1081124	ND	4.1828e+06	467992	5683891	1563445	1239997	942170	1112275	1337951	477232	495361	1.32377e+06	1180155	437486	1835316	1373441	1748933	451171	1.4947e+06	2652835	549160	5534070
	Tobacco Metabolite	3-hydroxycotinine glucuronide	43470	LC/MS Neg	100004494	1745	367.115	132929-88-5	183115	-	-	ND	573050	ND	ND	ND	ND	ND	ND	ND	ND	ND	ND	ND	ND	ND	ND	ND	ND	ND	ND	ND	651910	ND	ND	ND	ND	ND	ND	ND	ND	ND	ND	ND	ND	ND	ND	ND	ND
		cotinine	553	LC/MS Pos Early	848	2213	177.102	486-56-6	854019	-	HMDB01046	ND	78126016	ND	ND	ND	ND	ND	ND	ND	ND	ND	ND	ND	ND	ND	ND	ND	ND	ND	ND	ND	106104840	ND	ND	97730	ND	ND	ND	ND	ND	ND	ND	ND	ND	ND	ND	ND	ND
		cotinine N-oxide	38662	LC/MS Pos Early	100002719	1377	193.097	36508-80-2	9815514	-	HMDB01411	ND	3022264	ND	ND	ND	ND	ND	ND	ND	ND	ND	ND	ND	ND	ND	ND	ND	ND	ND	ND	ND	3616869	ND	ND	ND	ND	ND	ND	ND	ND	ND	ND	ND	ND	ND	ND	ND	ND
		hydroxycotinine	38661	LC/MS Pos Early	100002717	2030	193.097	34834-67-8	10219774	-	HMDB01390	ND	4733710	ND	ND	ND	ND	ND	ND	ND	ND	ND	ND	ND	ND	ND	ND	ND	ND	ND	ND	ND	3516543	ND	ND	ND	ND	ND	ND	ND	ND	ND	ND	ND	ND	ND	ND	ND	ND
	Xanthine Metabolism	1,3,7-trimethylurate	34404	LC/MS Neg	100001397	1985	209.068	5415-44-1	79437	C16361	HMDB02123	12008348	1128913	12401224	19888996	44199424	2444452	16862622	3292917	2181800	23725296	9638965	6241794	ND	72276608	17631734	21556684	19143984	18298322	40608908	24074890	5494507	544611	7.76047e+06	21650122	21213016	6464765	26019044	250175	4087942	26472308	7352659	3360047	30042372	ND	15047708	934118	15078431	16365683
		1,3-dimethylurate	32391	LC/MS Neg	100001106	1671.4	195.052	944-73-0	70346	-	HMDB01857	12875714	1854026	165550160	42022284	23271304	379789	25081548	ND	1213638	95141256	7782656	12534793	ND	52186512	6.19745e+06	12573031	16050031	66059400	31753236	11761468	9811726	ND	114815792	36559200	15128938	2952002	37934072	ND	4921081	50767240	4257765	4429709	17996660	100673	ND	2315499	21441540	35501612
		1,7-dimethylurate	34400	LC/MS Neg	100001399	1578.6	195.052	33868-03-0	91611	C16356	HMDB11103	74002096	8532967	259550304	119088376	136871296	6213628	112394032	30349674	14410147	366300960	63453720	50556848	856245	202849184	87086264	69910472	95185560	248201856	310700064	168223936	42383920	8.24729e+06	174381312	105867680	142865312	17207092	151097328	2747177	24866972	224600448	47611040	24080548	73712664	727497	119361200	8137192	116245264	218653056
		1-methylurate	34395	LC/MS Pos Early	100001400	1461	183.051	708-79-2	69726	C16359	HMDB03099	26689040	10163558	213608752	46137344	31462892	3542027	48852056	6714909	8750492	146505968	10405116	17248614	1603161	36877288	40863924	14418090	24080098	70008664	41893036	44324912	16355947	4973961	117640576	32284408	57238232	4826172	61384668	3531655	16560804	134636816	9583090	6603413	20624572	1235762	46694560	2507183	34523460	56474164
		1-methylxanthine	34389	LC/MS Neg	100001405	1568.8	165.042	6136-37-4	80220	C16358	HMDB10738	63807928	14971517	418755616	155870240	74149296	8062332	146236896	129605336	17077892	550470592	43036456	44156744	2260760	84423232	94806136	51557416	85757144	275882272	144598208	106934248	36681264	12898196	284907776	133023304	95838176	16198105	214370048	12030029	32139120	361054944	33282560	20802822	32912160	1.70533e+06	139346832	7346523	92814888	187994720
		3,7-dimethylurate	34399	LC/MS Neg	100001398	1418.2	195.052	13087-49-5	83126	C16360	HMDB01982	966271	11886067	4888457	17200688	13819785	2515785	8566964	4606363	699777	8376014	23059948	2953543	530729	18899222	1726482	675214	1.78115e+06	10904437	24370216	3365489	1.30672e+06	2880500	5117578	5823978	2968845	12122487	7981978	159184	587492	7335727	10228259	4741399	17869172	2286073	5.36052e+06	497225	4301927	9907945
		3-methylurate*	48252	LC/MS Neg	100004049	1024	181.037	605-99-2	11804	-	-	310115	1140040	4042618	3.85021e+06	3442619	256509	862779	3.08533e+06	485605	3372685	3261271	1211650	ND	8344053	737654	129852	436751	3.68266e+06	6067494	739035	313626	239114	2000074	867539	1.68784e+06	1096773	1047231	78646	527010	3315016	1337167	1578602	4580141	87553	1805260	ND	1491130	4937740
		3-methylxanthine	32445	LC/MS Neg	100001108	1700	165.042	1076-22-8	70639	C16357	HMDB01886	15502477	96959432	140531120	138024272	127444240	9926044	56759136	122090392	25025202	189834320	293812160	60639880	3797196	259406336	24835044	12683357	18910120	231204816	418267968	55711852	16499380	24650656	135894032	35925168	85043384	46951192	48719168	2.78163e+06	27663952	106126400	98800472	82859312	164055616	13044609	100437872	5745155	55873368	255099440
		5-acetylamino-6-amino-3-methyluracil	34424	LC/MS Polar	100001403	1710	197.068	1196153-01-1	88299	C16366	HMDB04400	76329552	45130080	368716512	142179088	233527760	5762660	119006976	34246988	72923624	440953728	46915380	126815616	2.59843e+06	180531168	122846640	110173040	101342288	593778752	356827328	168940288	55872360	68176952	347267776	134806608	287274592	13932935	170695008	4.74431e+06	127667072	221339408	39123688	85613000	58845772	2.95858e+06	191036576	22177588	127468608	255477392
		5-acetylamino-6-formylamino-3-methyluracil	34401	LC/MS Polar	100001402	1424	225.063	85438-96-6	108214	C16365	HMDB11105	11926023	31473944	130464944	46130084	ND	ND	36586804	1.84767e+06	4286114	193743680	14127883	20965806	2325076	32035282	54049984	74433480	89414096	1095474048	425996800	ND	9894212	57733588	171846720	36681240	ND	870356	70381320	ND	11325720	140711856	13154546	40255944	5913222	2.86499e+06	53335888	5898460	46713252	782661440
		7-methylurate	39598	LC/MS Neg	100002241	1138	181.037	612-37-3	69160	-	-	28225442	181987520	112359008	159015872	188453280	26479280	118473096	8.0739e+06	47995348	127652240	170616096	91141480	4710490	171255920	68322640	19051288	37768084	104557496	220111552	87488736	49576816	70862824	95929752	72622120	123264920	79316992	91628888	ND	35511392	125685600	94659728	108531032	154731504	27801472	78669888	6200028	78077664	158118496
		7-methylxanthine	34390	LC/MS Neg	100001396	1638.5	165.042	552-62-5	68374	C16353	HMDB01991	2580528	38862672	38060816	31782858	21647864	1415758	11281926	37399448	3837427	53826452	50636500	9019342	529490	33878912	4.01362e+06	1569485	1.58011e+06	47572880	51359652	8385511	2245928	8999231	33049718	6995621	20693988	8849844	12600915	632386	5421587	29955564	15607525	11755545	26924662	2424483	10615266	456889	4905431	59814732
		caffeic acid sulfate	53254	LC/MS Neg	100009337	870	258.992	-	-	-	HMDB41708	8932537	6914087	2453451	1593139	2910522	12097985	2552872	4094047	5495971	30624010	27145774	3103256	7.61455e+06	5265130	43045552	6658431	3219776	7387156	1.76996e+06	4098970	10509574	11485898	23201648	2.0114e+06	8718352	1466995	2879421	9596506	6817821	12002494	14368595	4117898	6736210	1427902	27566988	7992602	2604561	13585223
		caffeine	569	LC/MS Pos Early	849	2106	195.088	58-08-2	2519	C07481	HMDB01847	3871008	ND	4665138	4089345	34025540	2724686	10911309	2152583	2567160	5231455	4294832	1965256	ND	26638048	13286665	8623490	10283638	4882184	44297524	22850168	3051735	ND	2782995	5536311	16675913	8293207	13213225	ND	4335596	7.03107e+06	4094376	1066107	13485814	ND	9208500	ND	9892867	9418922
		paraxanthine	18254	LC/MS Neg	100000453	2279	179.057	611-59-6	4687	C13747	HMDB01860	5489188	1320936	9214706	10919812	24412812	1172286	22578324	7173398	1583644	16773079	3846488	1715368	ND	5141673	6943178	5800527	5567626	15478831	28489704	11328120	4398163	1502284	7368038	11087610	21870308	2713636	30609616	ND	3713671	10677199	2528427	1830554	3500498	ND	8162286	ND	5143400	14678021
		theobromine	18392	LC/MS Pos Early	100000445	1600	181.072	83-67-0	5429	C07480	HMDB02825	48305096	130991640	20413288	335648640	844772160	92900592	265104368	217669760	49492460	74634976	370162912	49367356	14036131	205437888	84972584	21144496	37286532	74347832	687024512	90319600	87658144	43228304	39473504	121412552	249298992	409214784	265459056	3107242	28680718	119561440	266379472	205950512	243672256	162793424	114973944	9345564	88875232	230883152
		theophylline	18394	LC/MS Neg	100000437	2356.9	179.057	58-55-9	2153	C07130	HMDB01889	4581052	ND	8359693	9857558	24611132	ND	19253796	5659558	2051454	15649504	3285230	2921568	ND	9184443	5905268	5956219	6769711	16888800	34623740	11415288	4262864	ND	6547821	11554807	13475332	1880907	20941908	ND	4409997	11856074	2677584	2261502	5042263	ND	8191764	ND	6990240	15478607
*Indicates tentative metabolite identification and no purified chemical standard.
[truncated: 22 more columns]
